# Supplementary material for: Transfer Learning for Mendelian Randomization with Pleiotropic and Correlated High-Dimensional Exposures and Its Application to Trans-ethnic Populations
Source: Research Square preprint supplement (doi:10.21203/rs.3.rs-7712945/v1), 2025-10-01
Supplement: Supplementary file 1 [file a9f90f7cdac0ca7ed5c33849.pdf]

# Supplementary File

## Content

|                                                                                                    |    |
|----------------------------------------------------------------------------------------------------|----|
| Figure S1. ROC curve of TL-HDMR simulation results. ....                                           | 3  |
| Figure S2. MAE of TL-HDMR simulation results. ....                                                 | 4  |
| Figure S3. ROC curve of TL-HDMR simulation results. ....                                           | 5  |
| Figure S4. MAE of TL-HDMR simulation results. ....                                                 | 6  |
| Figure S5. ROC curve of TL-HDMR simulation results. ....                                           | 7  |
| Figure S6. MAE of TL-HDMR simulation results. ....                                                 | 8  |
| Figure S7. ROC curve of TL-HDMR simulation results. ....                                           | 9  |
| Figure S8. MAE of TL-HDMR simulation results. ....                                                 | 10 |
| Figure S9. ROC curve of TL-HDMR.TSD simulation results. ....                                       | 11 |
| Figure S10. MAE of TL-HDMR.TSD simulation results.....                                             | 12 |
| Figure S11. Workflow of application. ....                                                          | 13 |
| Figure S12. The number of causal metabolites in application (Cardioembolic stroke).<br>.....       | 14 |
| Figure S13. Difference of causal metabolites among four ethnics (Cardioembolic<br>stroke). ....    | 15 |
| Figure S14. Enrichment results causal metabolites for four ethnics (Cardioembolic<br>stroke). .... | 16 |
| Figure S15. The number of causal metabolites in application (Large artery stroke)...               | 17 |
| Figure S16. Difference of causal metabolites among four ethnics (Large artery stroke).<br>.....    | 18 |
| Figure S17. Enrichment results causal metabolites for four ethnics (Large artery<br>stroke). ....  | 19 |
| Figure S18. The number of causal metabolites in application (Small vessel stroke). .               | 20 |
| Figure S19. The number of causal metabolites in application (Small vessel stroke). .               | 21 |
| Figure S20. Enrichment results causal metabolites for four ethnics (Small vessel<br>stroke). ....  | 22 |
| Figure S21. The number of causal metabolites in application (Ischemic stroke). .....               | 23 |
| Figure S22. Difference of causal metabolites among four ethnics (Ischemic stroke). .               | 24 |
| Figure S23. Enrichment results causal metabolites for four ethnics (Ischemic stroke).<br>.....     | 25 |
| Figure S24. Difference of causal metabolites among stroke and its four subtypes<br>(AFR). ....     | 26 |
| Figure S25. Enrichment results causal metabolites for stroke and its four subtypes<br>(AFR). ....  | 27 |
| Figure S26. Difference of causal metabolites among stroke and its four subtypes (SA).<br>.....     |    |

|                                                                                              |    |
|----------------------------------------------------------------------------------------------|----|
| .....                                                                                        | 28 |
| Figure S27. Enrichment results causal metabolites for stroke and its four subtypes (SA)..... | 29 |
| Figure S28. Difference of causal metabolites among stroke and its four subtypes (EUR).....   | 30 |
| Figure S29. Difference of causal metabolites among stroke and its four subtypes (EUR).....   | 31 |

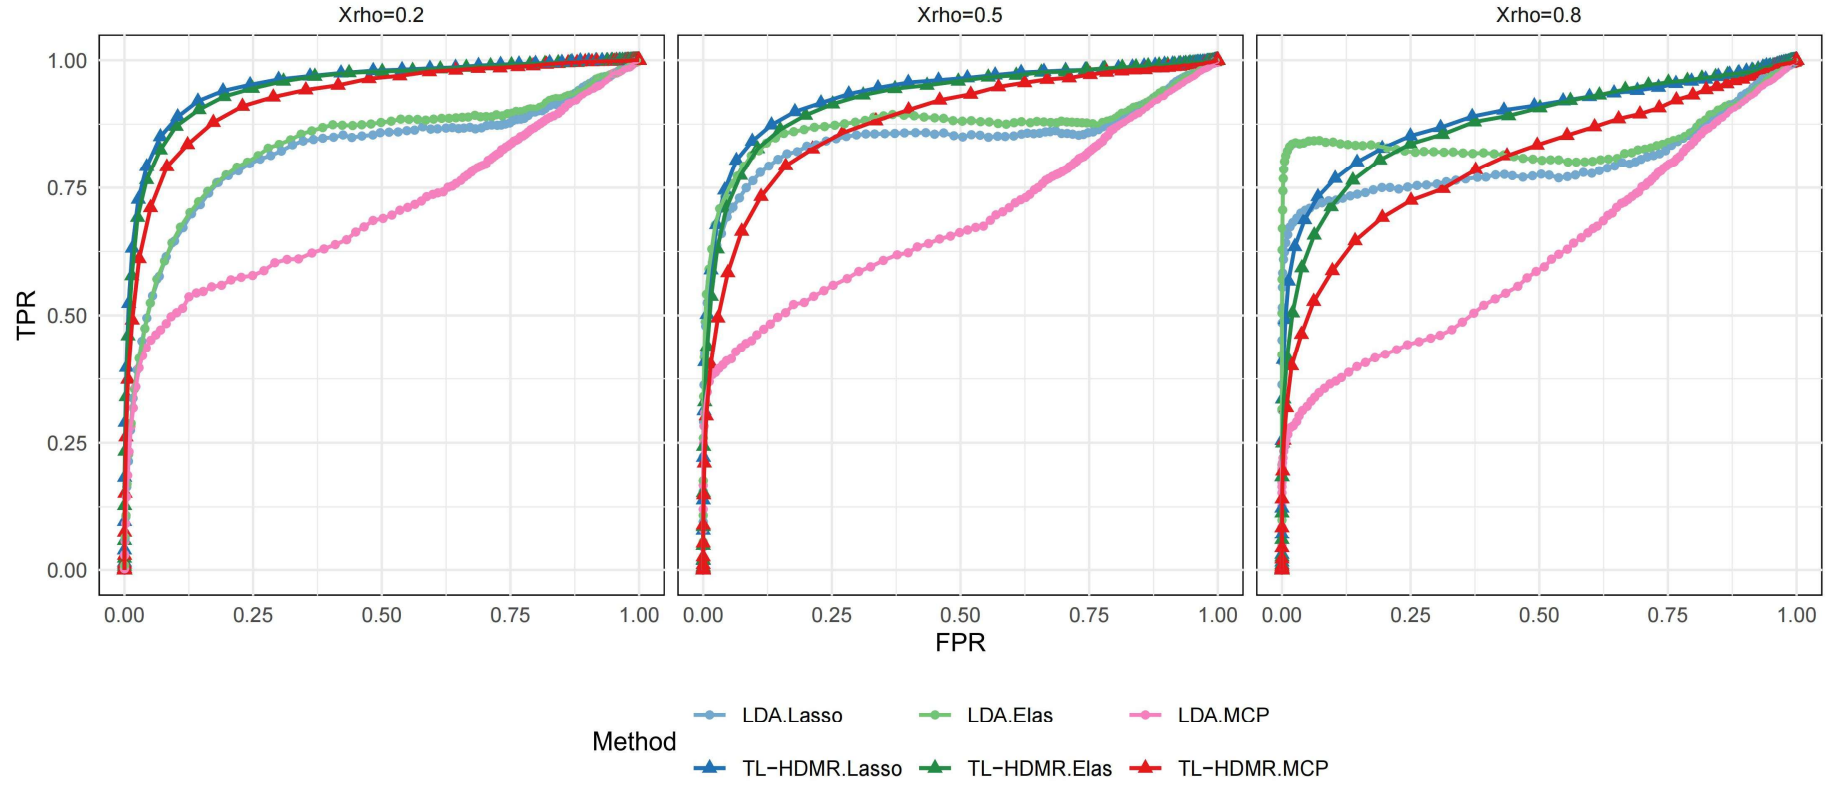

**Figure S1. ROC curve of TL-HDMR simulation results.**

$\rho_p = 0$ ,  $\rho_g = 0.5$ ,  $\rho_X$  is 0.2, 0.5 or 0.8. The number of IVs in the target datasets is 80. The number of source datasets is  $K=3$ . The number of exposures is  $P=100$ .

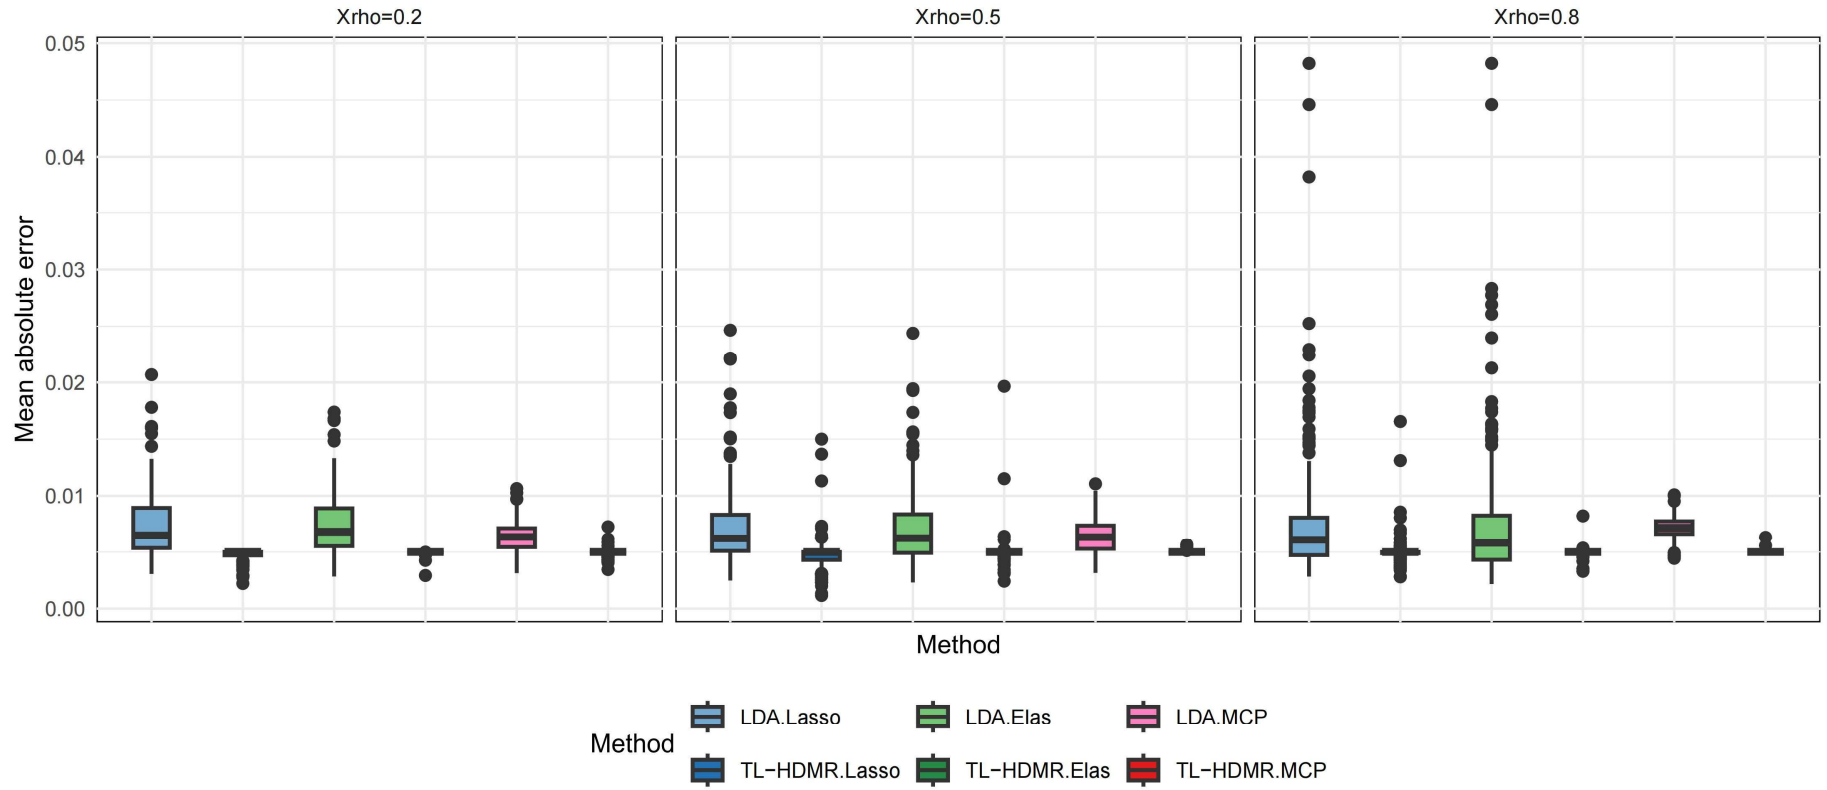

**Figure S2. MAE of TL-HDMR simulation results.**

$\rho_p = 0$ ,  $\rho_g = 0.5$ ,  $\rho_X$  is 0.2, 0.5 or 0.8. The number of IVs in the target datasets is 80. The number of source datasets is  $K=3$ . The number of exposures is  $P=100$ .



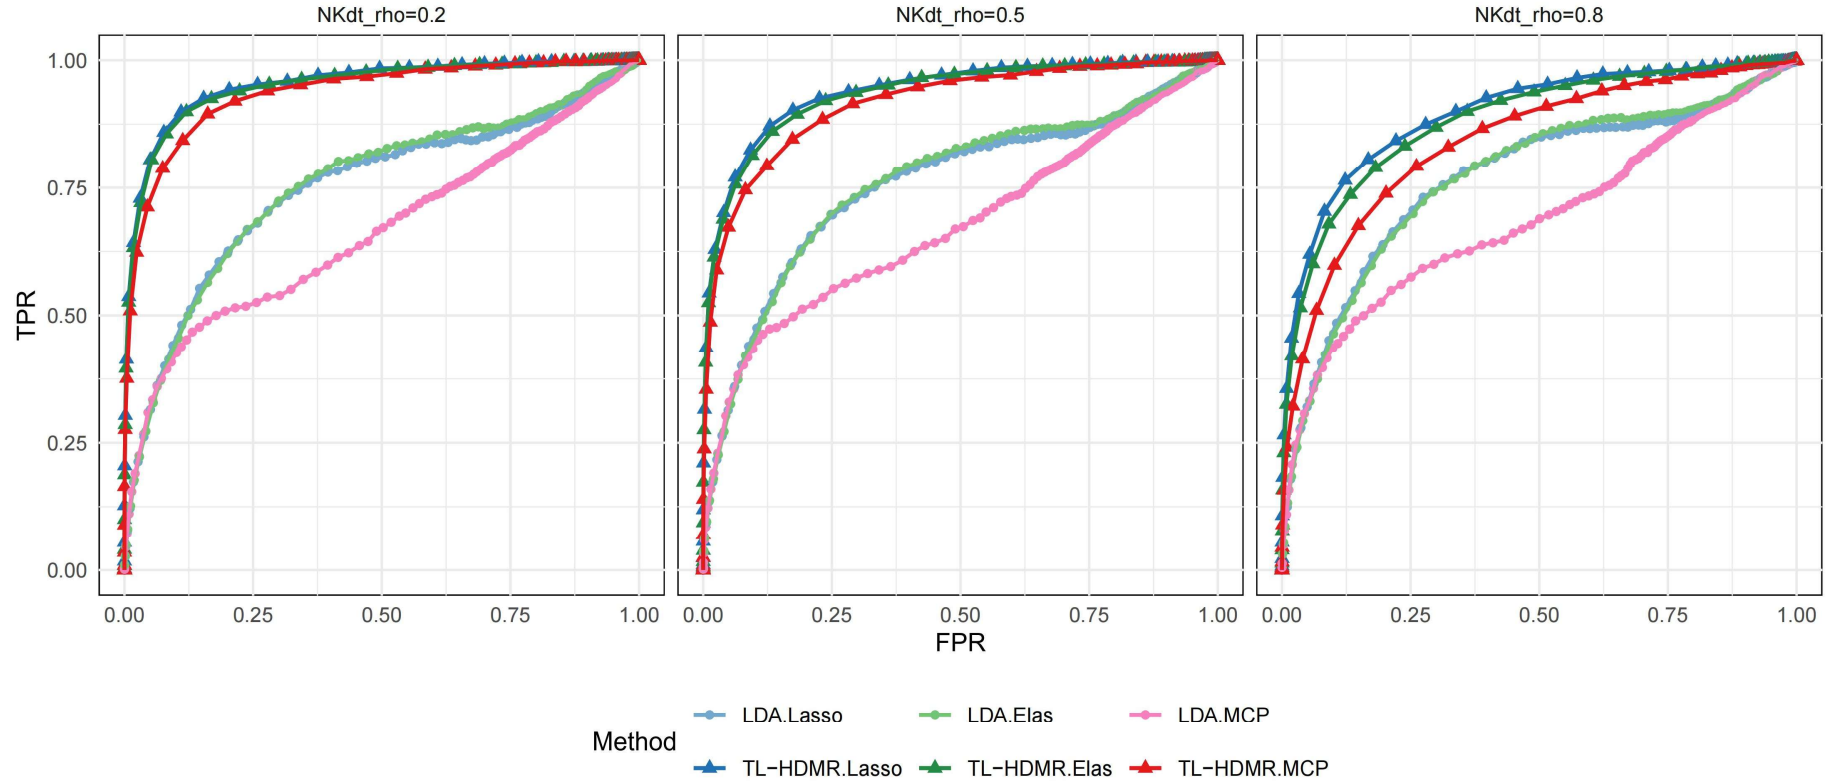

**Figure S3. ROC curve of TL-HDMR simulation results.**

$\rho_g = 0.5$ ,  $\rho_x = 0$ ,  $\rho_p$  is 0.2, 0.5 or 0.8. The number of IVs in the target datasets is 80. The number of source datasets is  $K=3$ . The number of exposures is  $P=100$ .

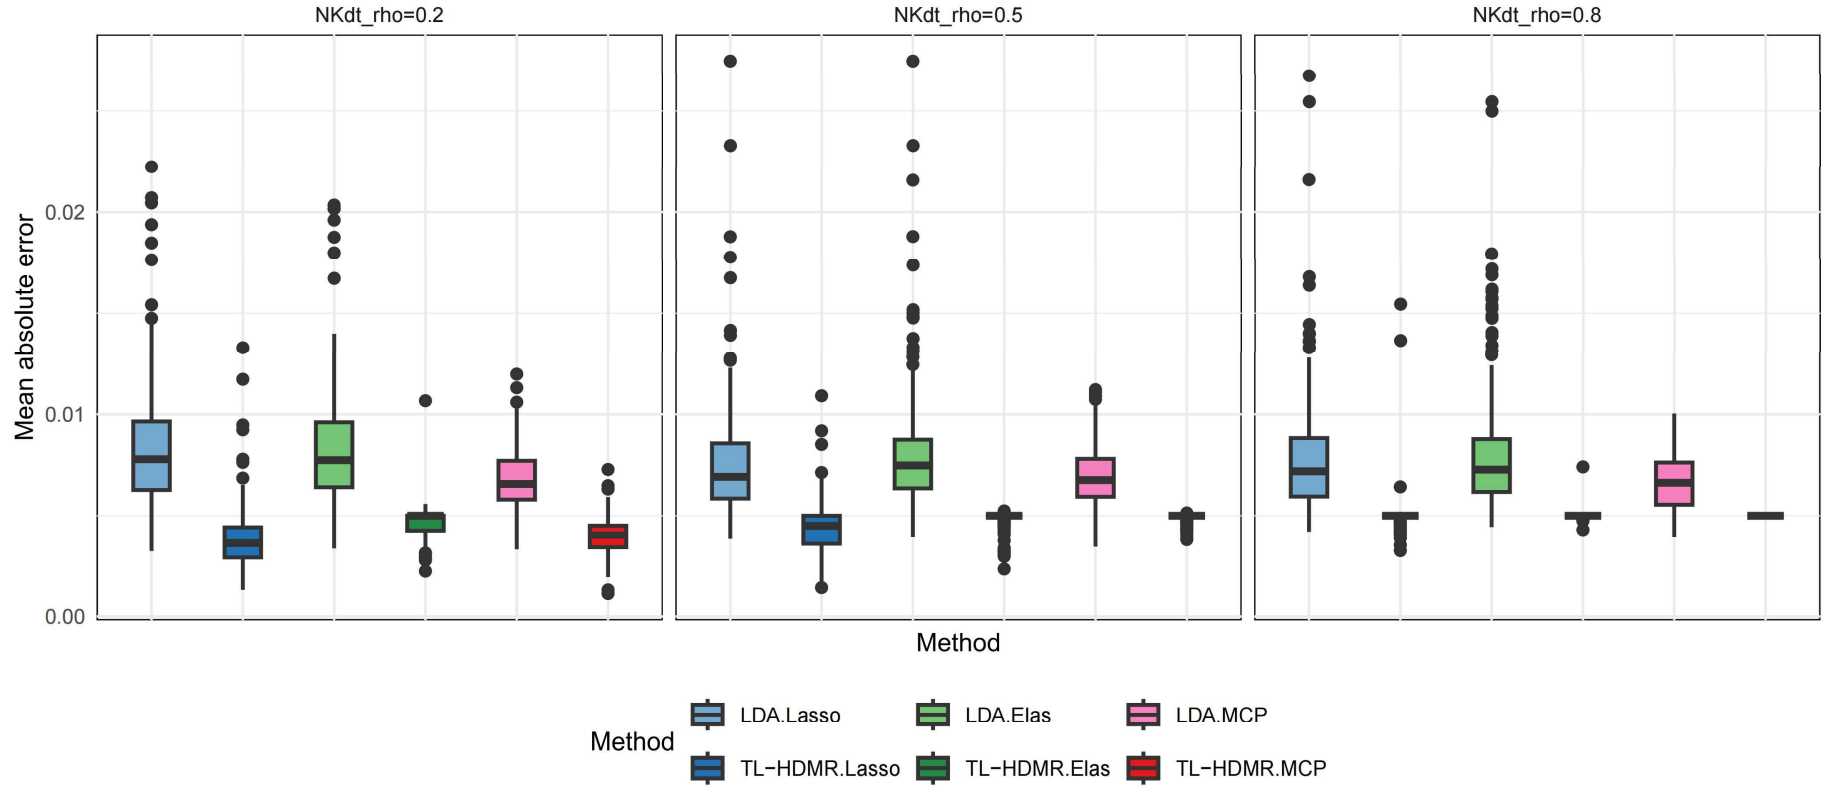

**Figure S4. MAE of TL-HDMR simulation results.**

$\rho_g = 0.5, \rho_x = 0, \rho_p$  is 0.2, 0.5 or 0.8. The number of IVs in the target datasets is 80. The number of source datasets is  $K=3$ . The number of exposures is  $P=100$ .

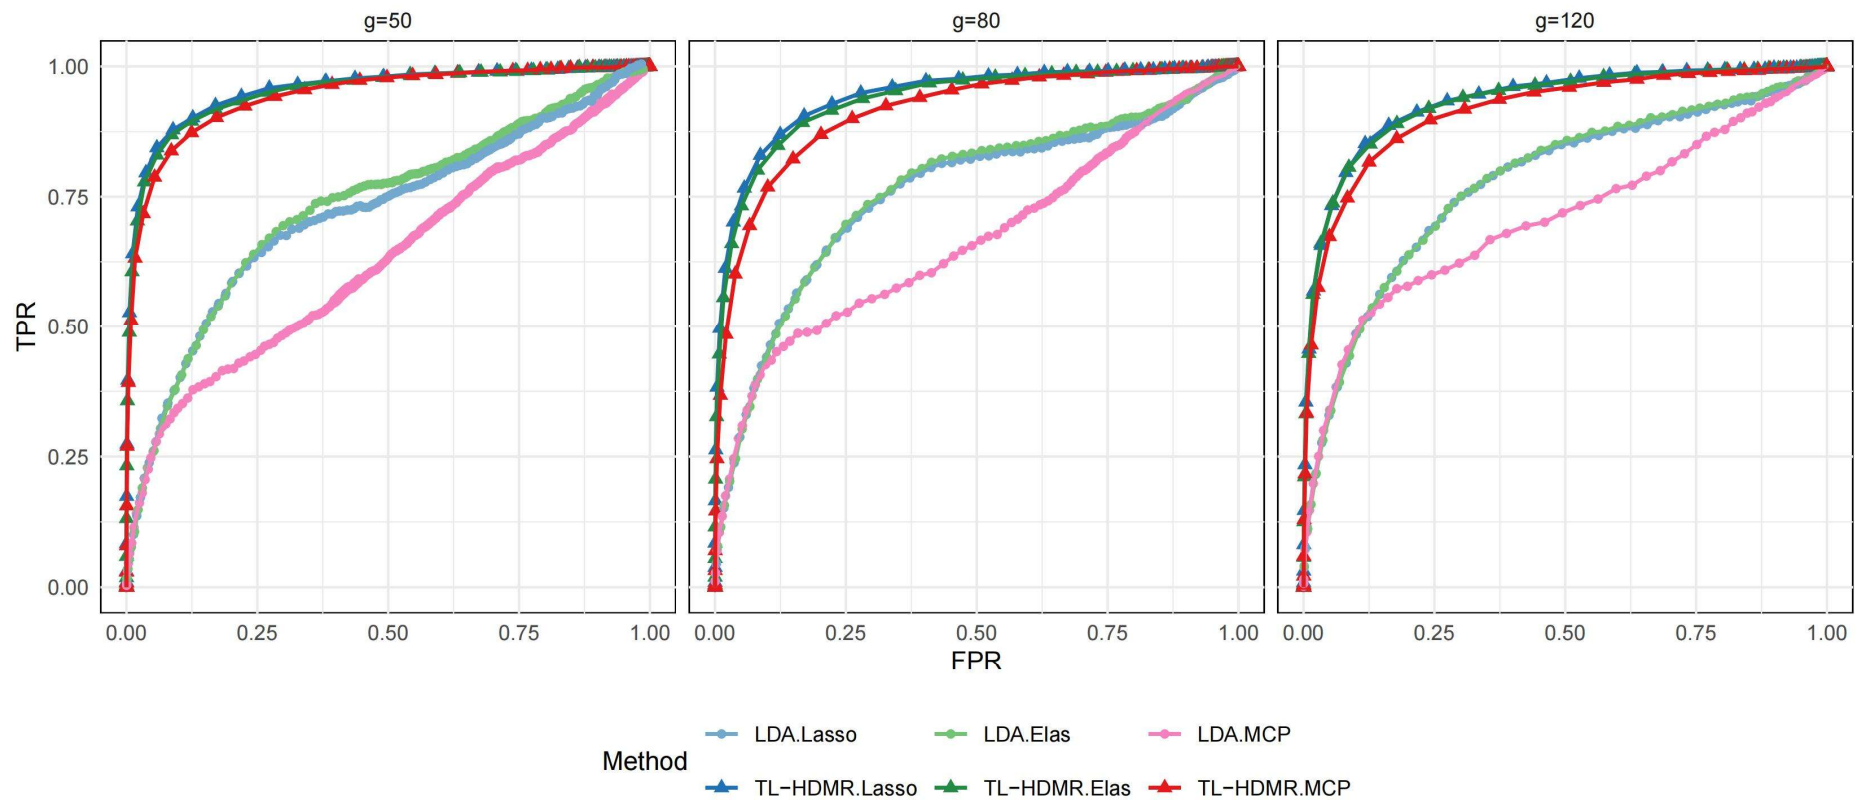

**Figure S5. ROC curve of TL-HDMR simulation results.**

$\rho_X = 0$ ,  $\rho_p = 0$ ,  $\rho_g = 0.5$ , The number of IVs in the target datasets is 50, 80 and 120. The number of source datasets is  $K=3$ . The number of exposures is  $P=100$ .

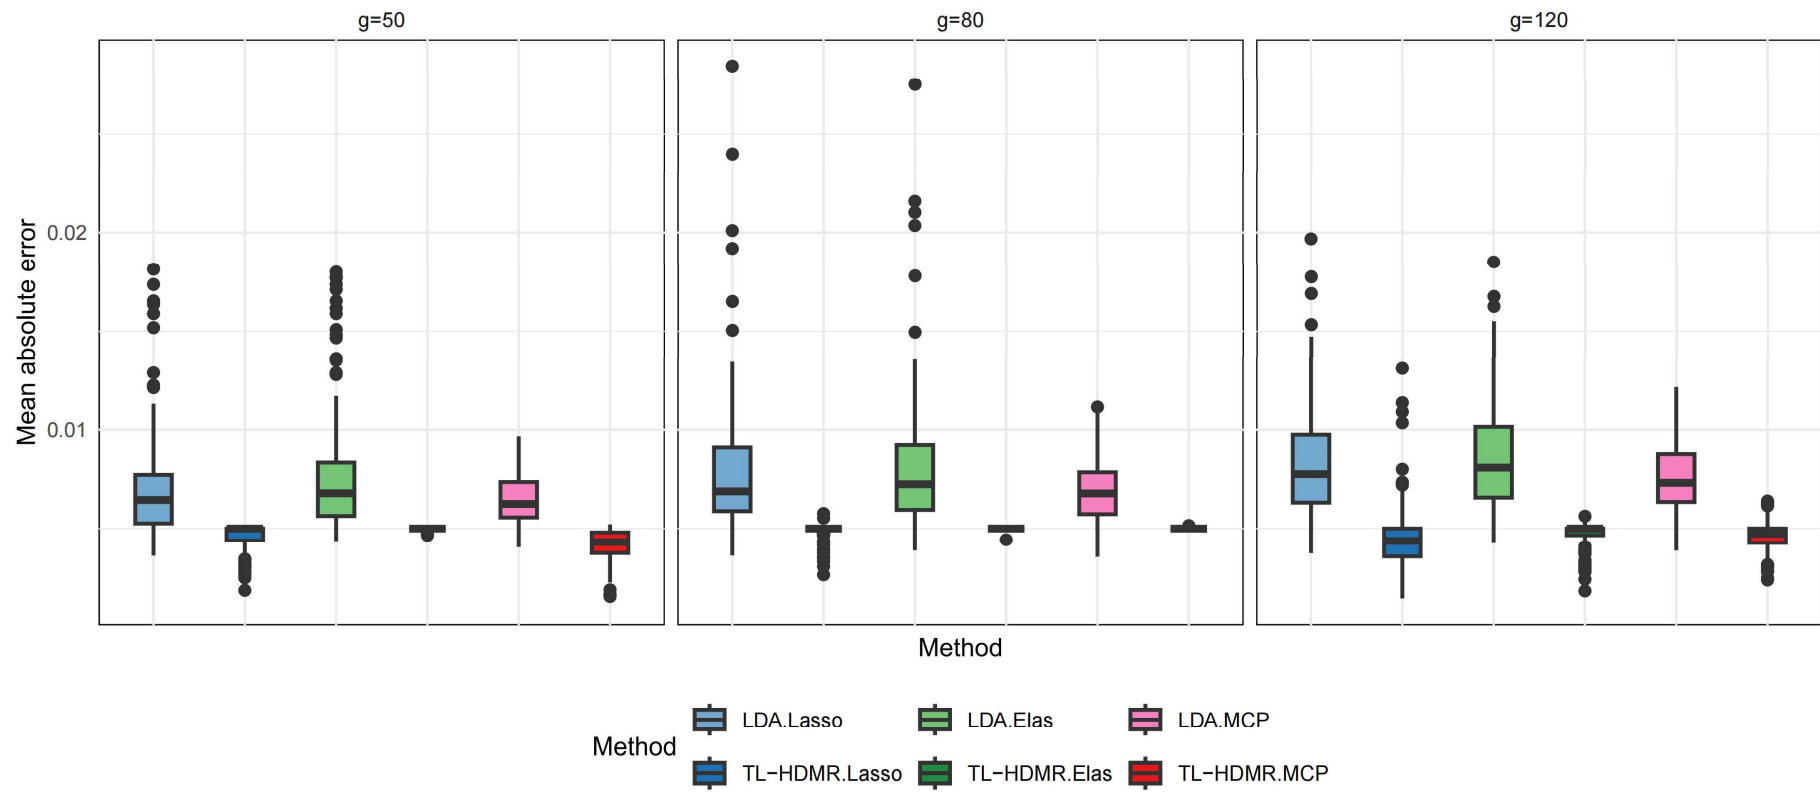

**Figure S6. MAE of TL-HDMR simulation results.**

$\rho_X = 0$ ,  $\rho_p = 0$ ,  $\rho_g = 0.5$ , The number of IVs in the target datasets is 50, 80 and 120. The number of source datasets is  $K=3$ . The number of exposures is  $P=100$ .

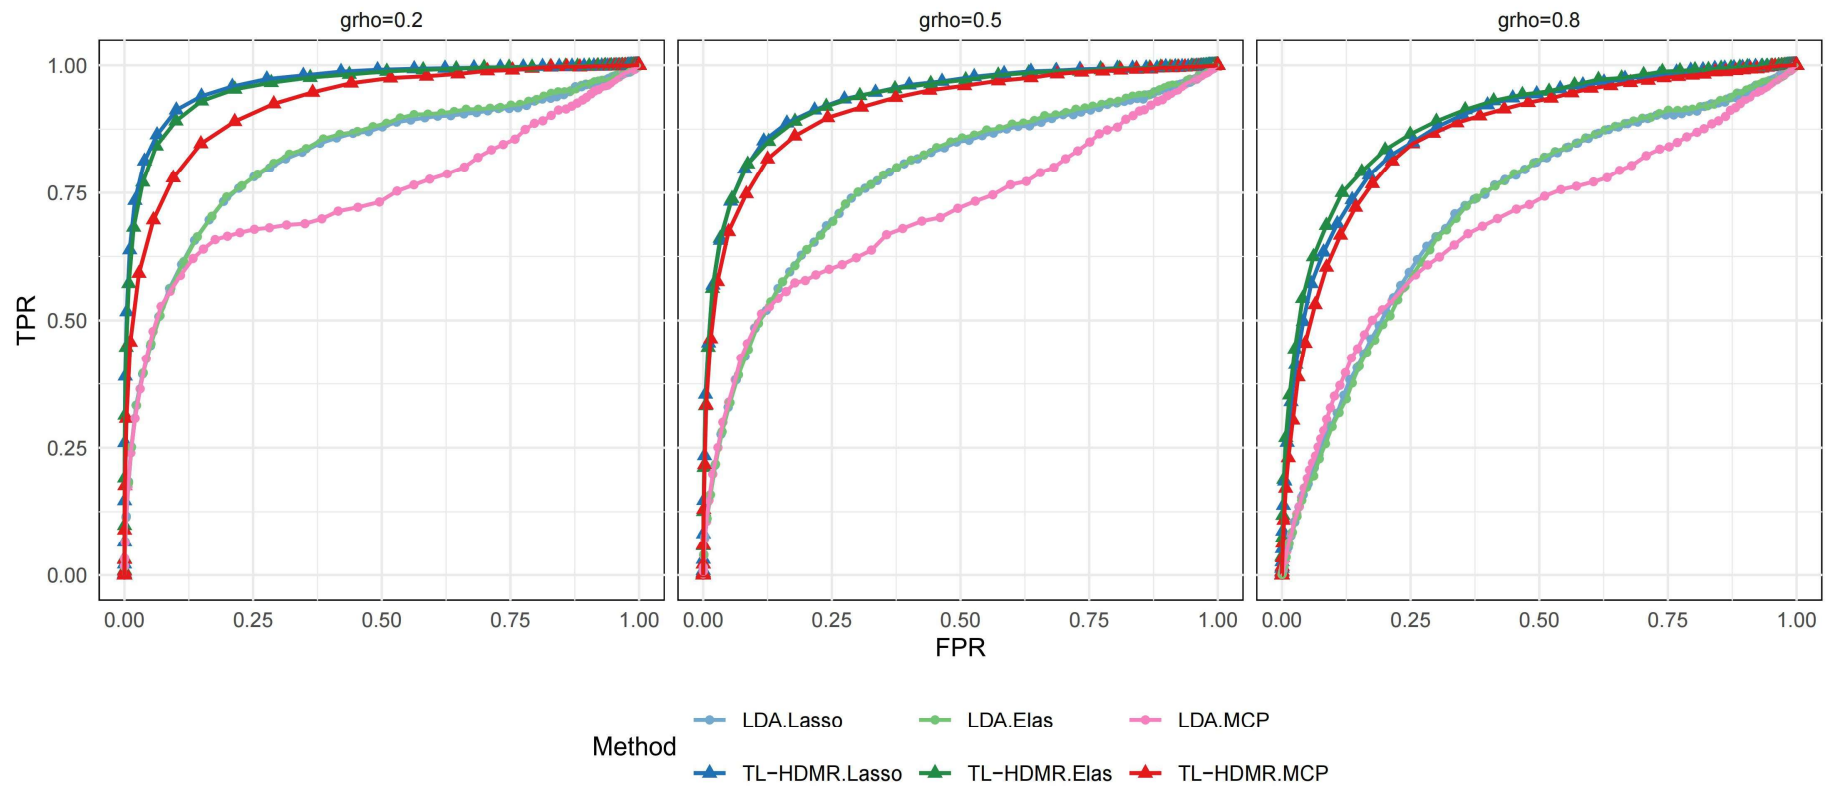

**Figure S7. ROC curve of TL-HDMR simulation results.**

$\rho_X = 0$ ,  $\rho_p = 0$ ,  $\rho_g$  is 0.2, 0.5 or 0.8. The number of IVs in the target datasets is 120. The number of source datasets is  $K=3$ . The number of exposures is  $P=100$ .

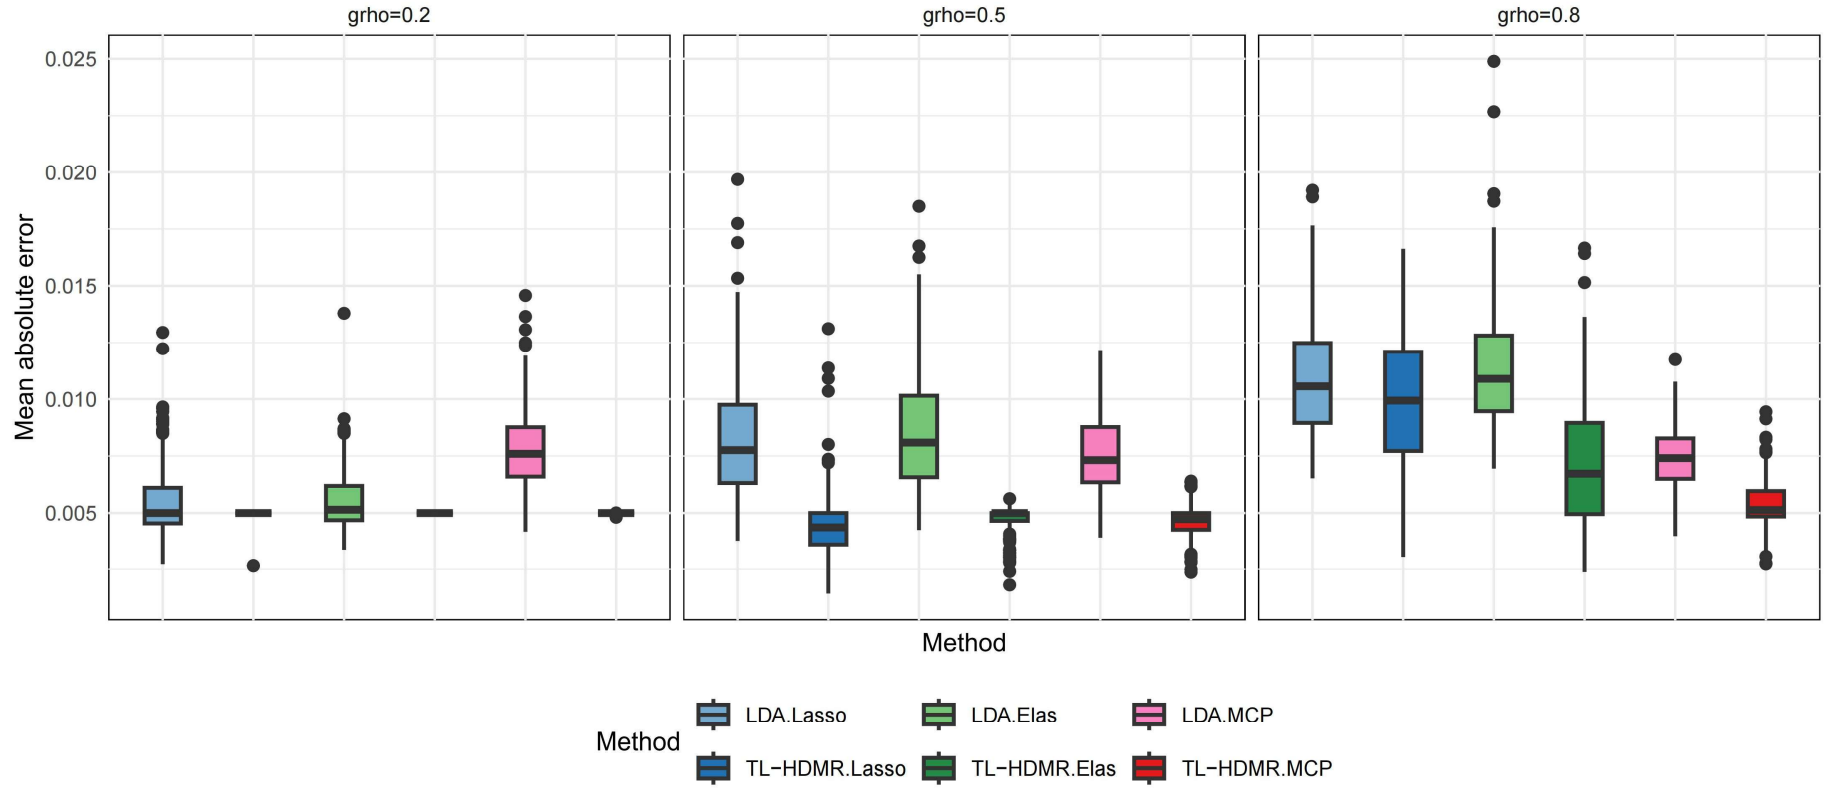

**Figure S8. MAE of TL-HDMR simulation results.**

$\rho_X = 0$ ,  $\rho_p = 0$ ,  $\rho_g$  is 0.2, 0.5 or 0.8. The number of IVs in the target datasets is 120. The number of source datasets is  $K=3$ . The number of exposures is  $P=100$ .

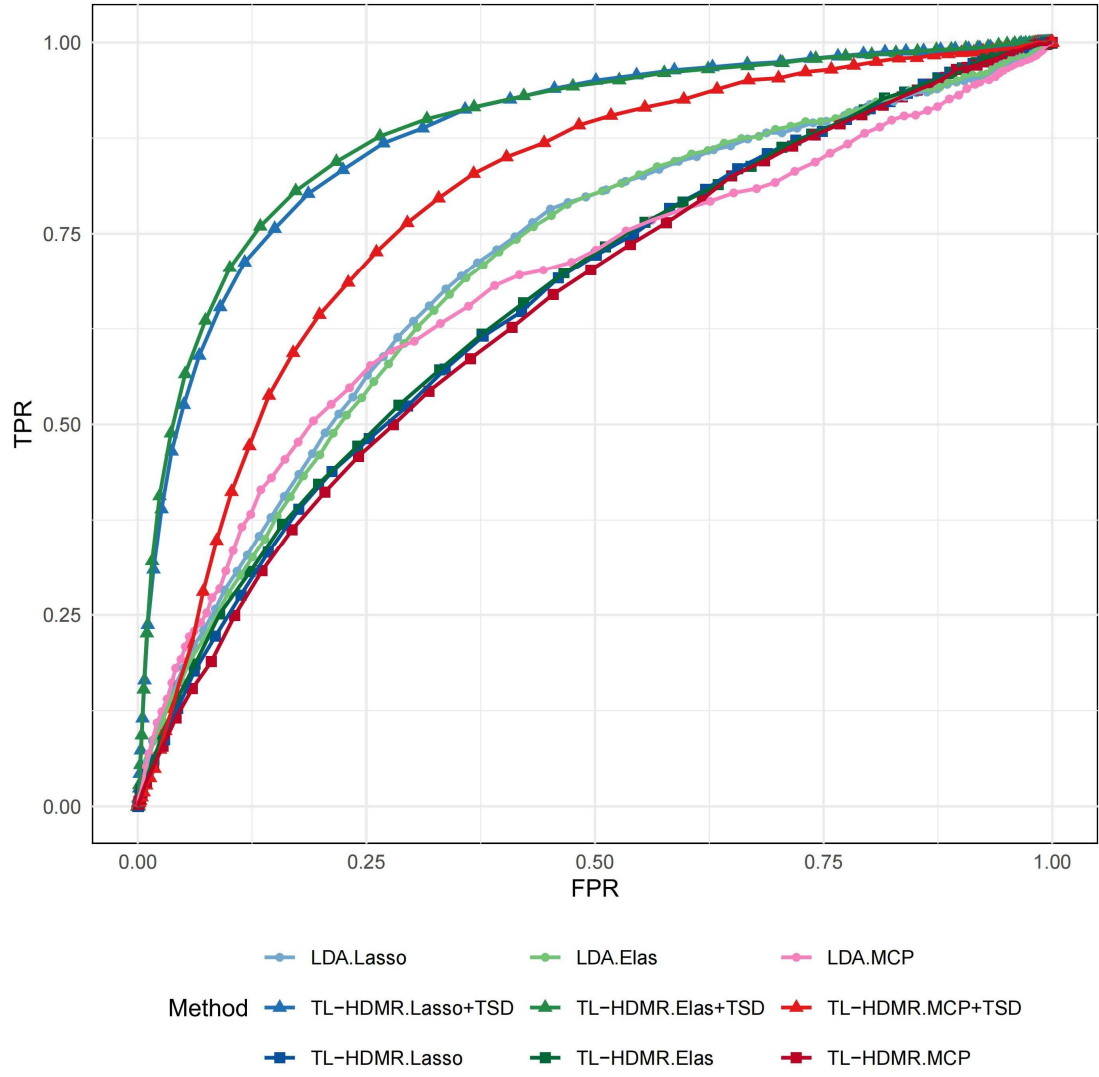

**Figure S9. ROC curve of TL-HDMR.TSD simulation results.**

The LD between SNPs is  $\rho_g = 0.8$ . The number of IVs in the target datasets is  $J_0 = 120$ . The number of exposures is  $P = 100$ .  $\rho_X = 0$ ,  $\rho_p = 0$ . The number of candidate source datasets is  $K = 5$ , and set  $\delta = 0.05$  for three true source datasets, set  $\delta = 0.2$  for the other two spurious source datasets.





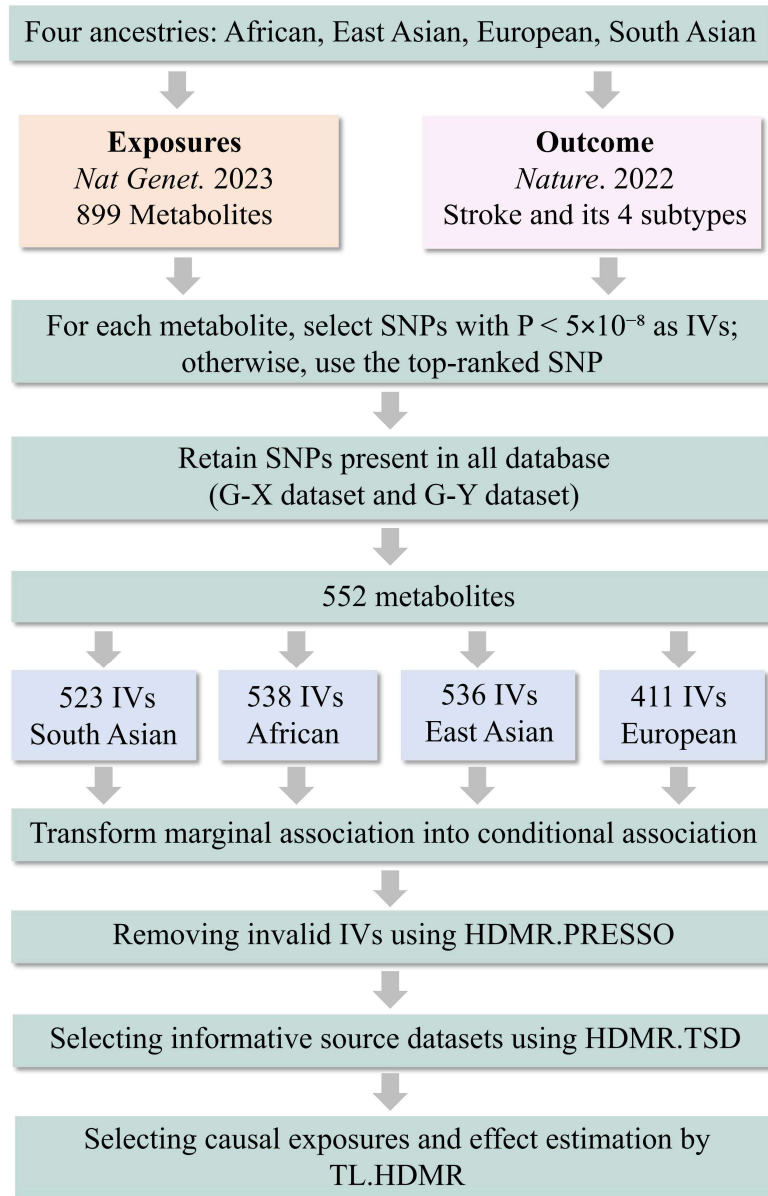

**Figure S11. Workflow of application.**

## Cardioembolic stroke

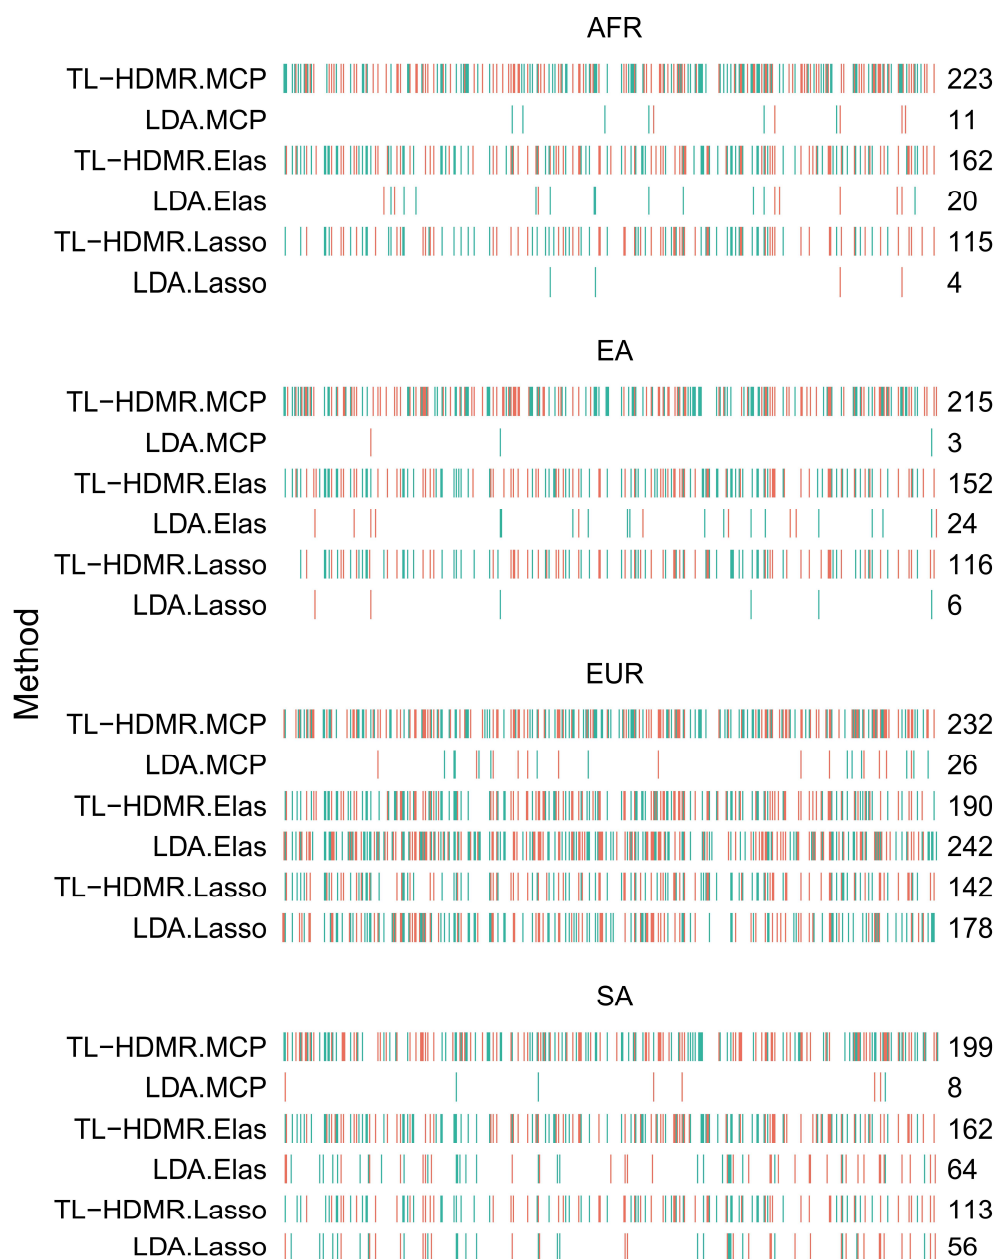

**Figure S12. The number of causal metabolites in application (Cardioembolic stroke).**

## Cardioembolic stroke

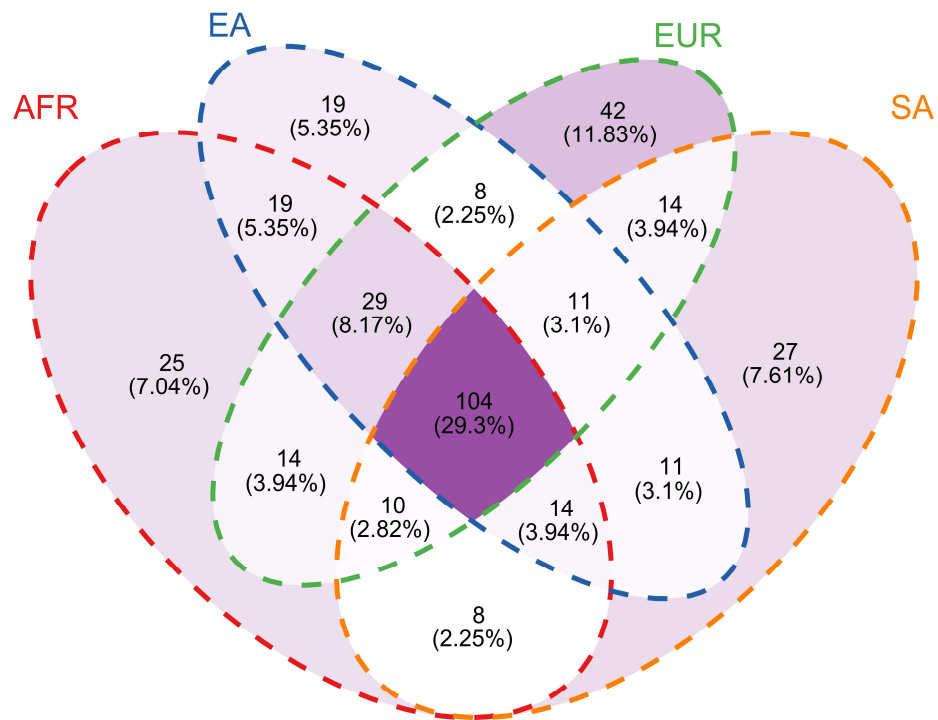

**Figure S13. Difference of causal metabolites among four ethnics (Cardioembolic stroke).**

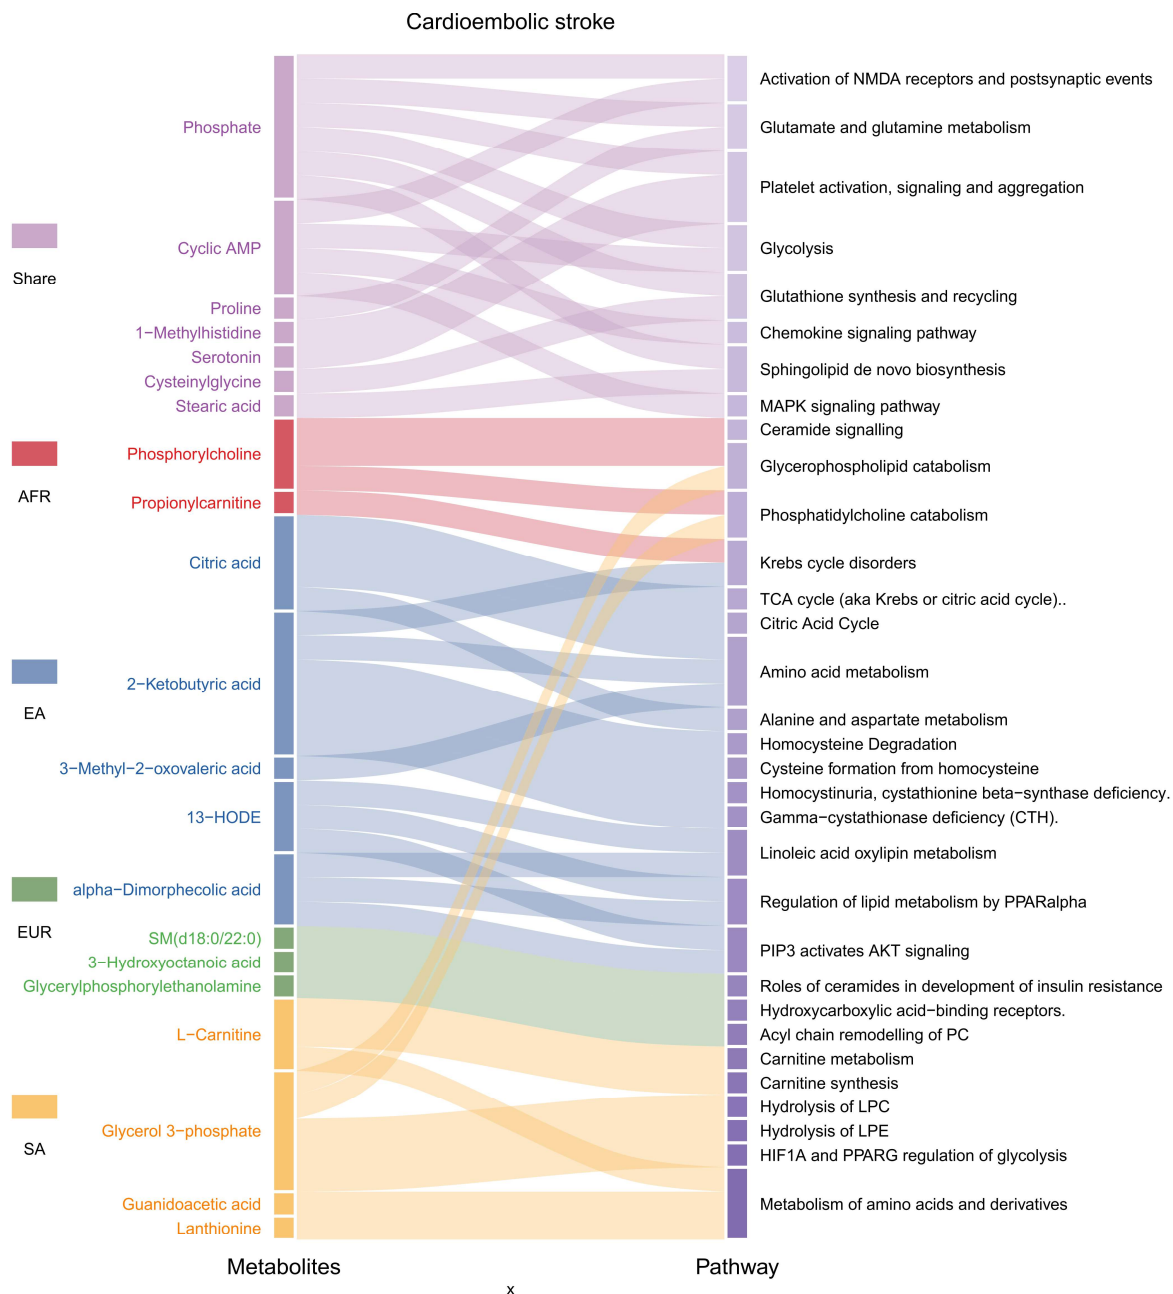

**Figure S14. Enrichment results causal metabolites for four ethnics (Cardioembolic stroke).**

## Large artery stroke

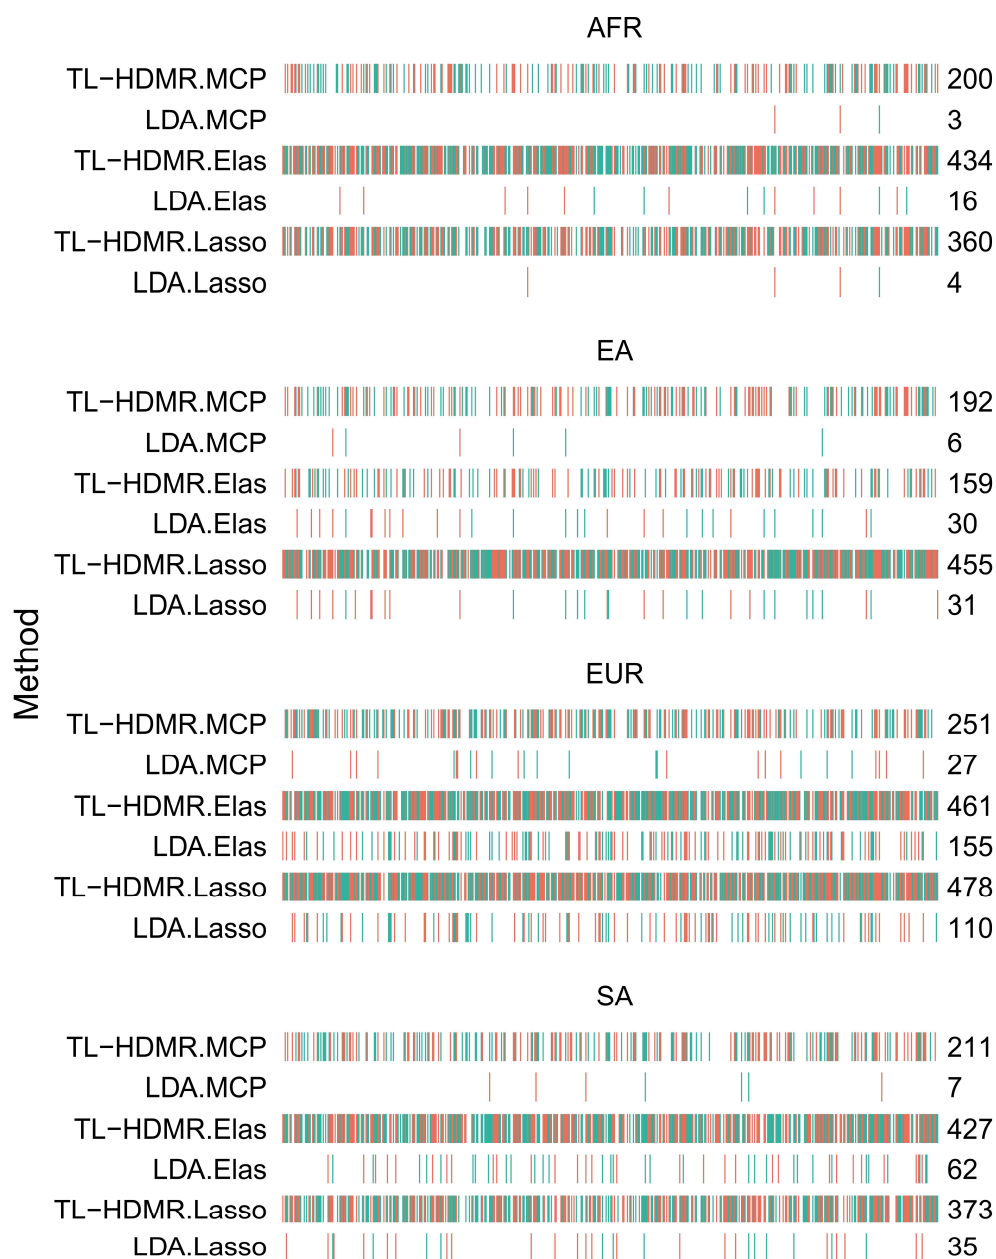

**Figure S15. The number of causal metabolites in application (Large artery stroke).**

## Large artery stroke

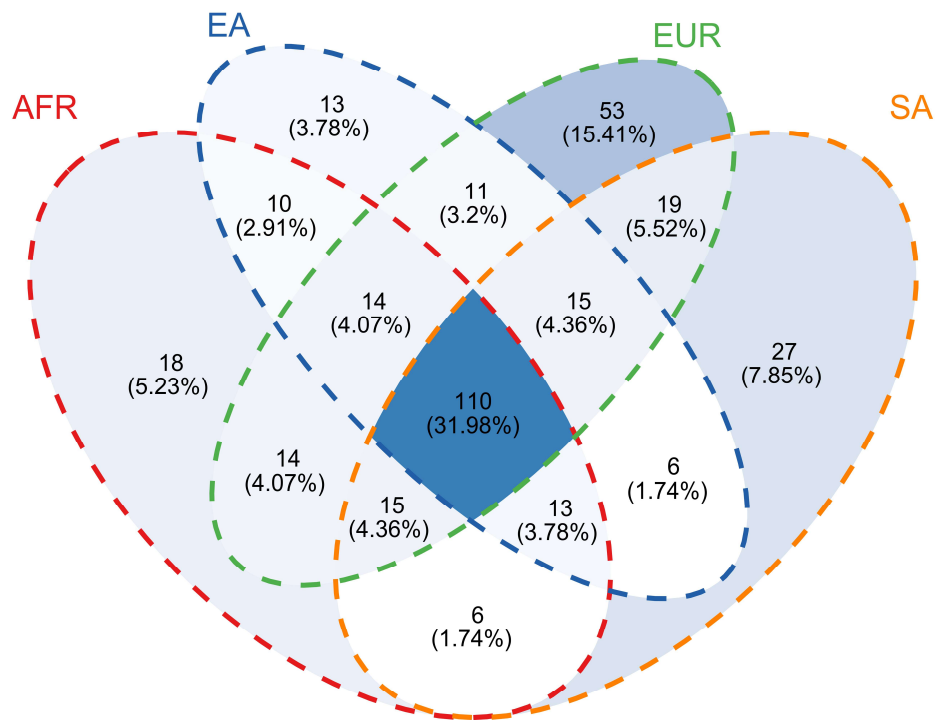

**Figure S16. Difference of causal metabolites among four ethnics (Large artery stroke).**



## Small vessel stroke

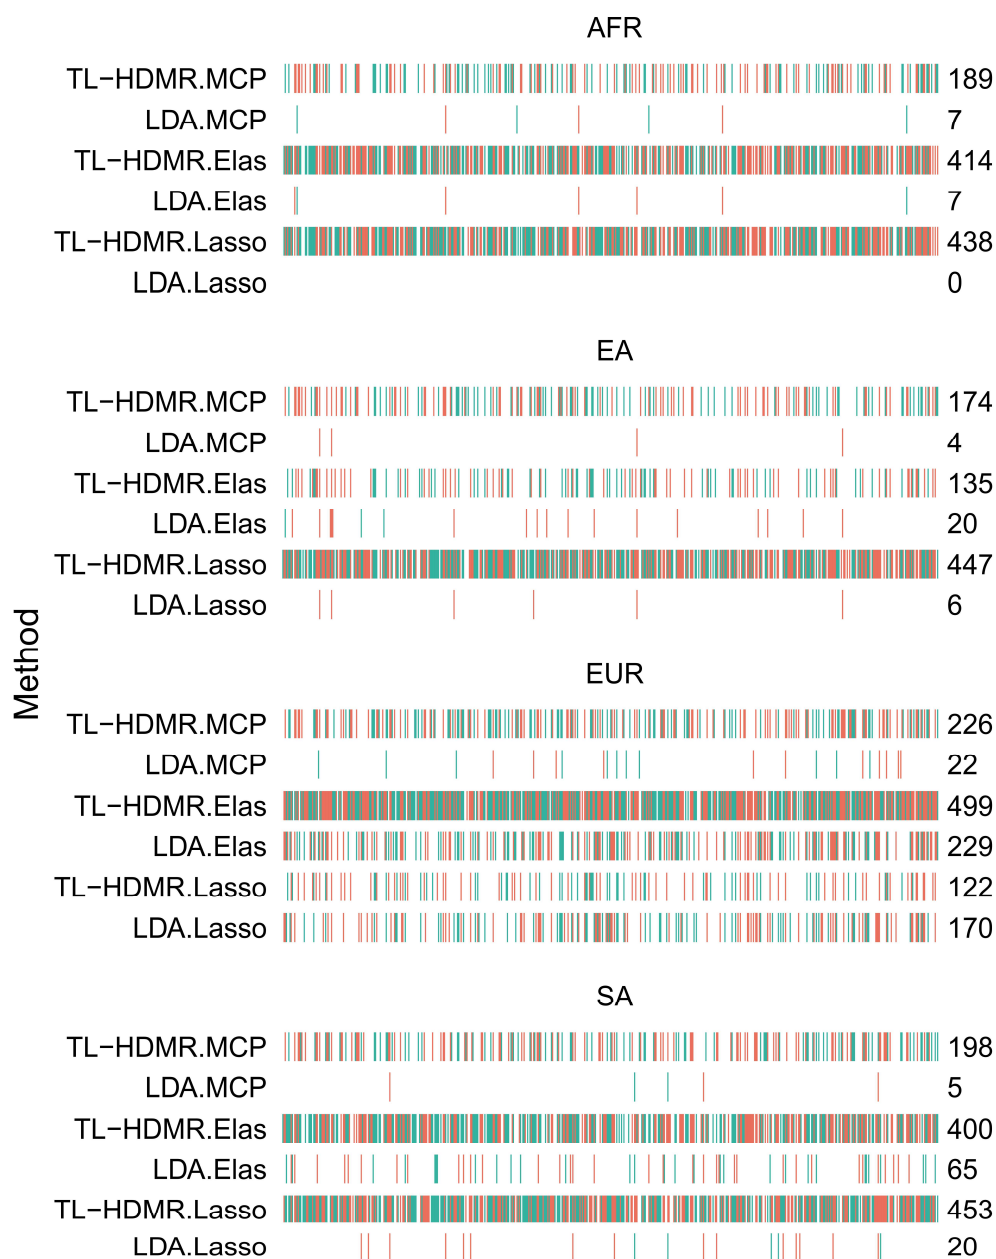

**Figure S18. The number of causal metabolites in application (Small vessel stroke).**



## Small vessel stroke

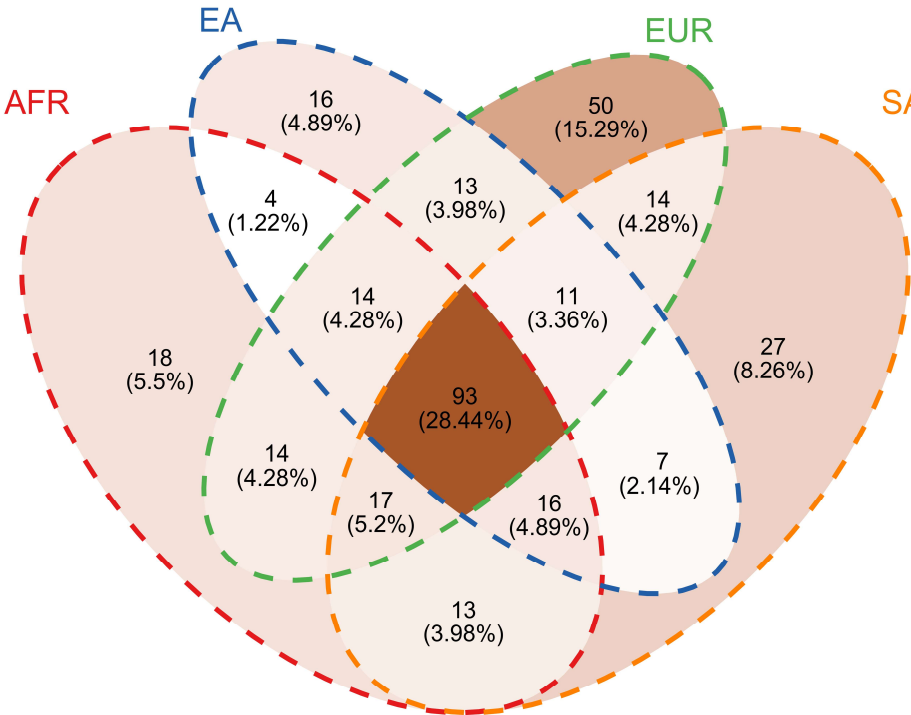

**Figure S19. The number of causal metabolites in application (Small vessel stroke).**

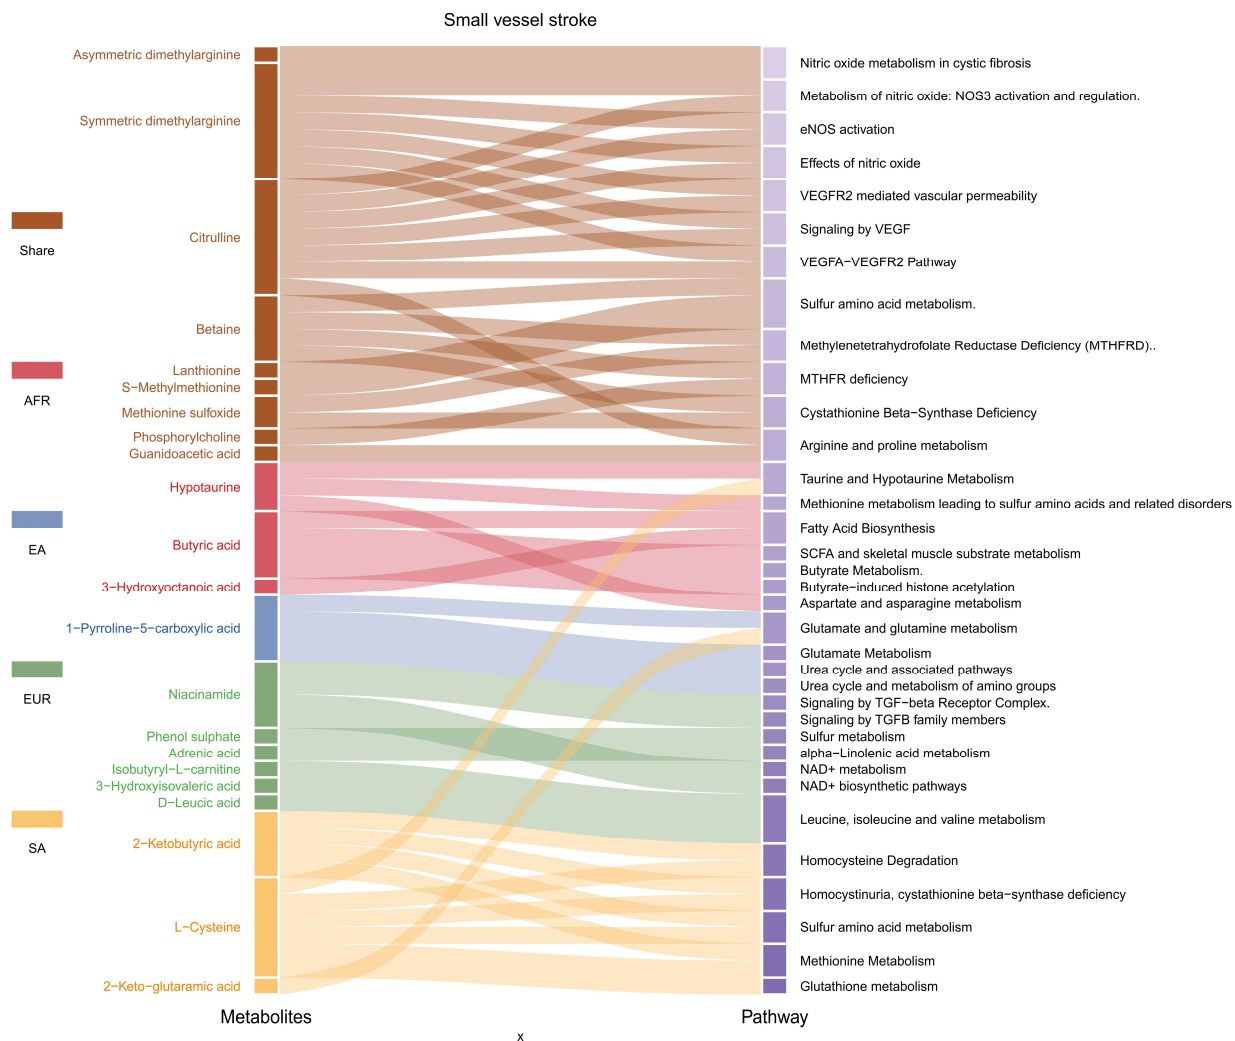

**Figure S20. Enrichment results causal metabolites for four ethnics (Small vessel stroke).**

## Ischemic stroke

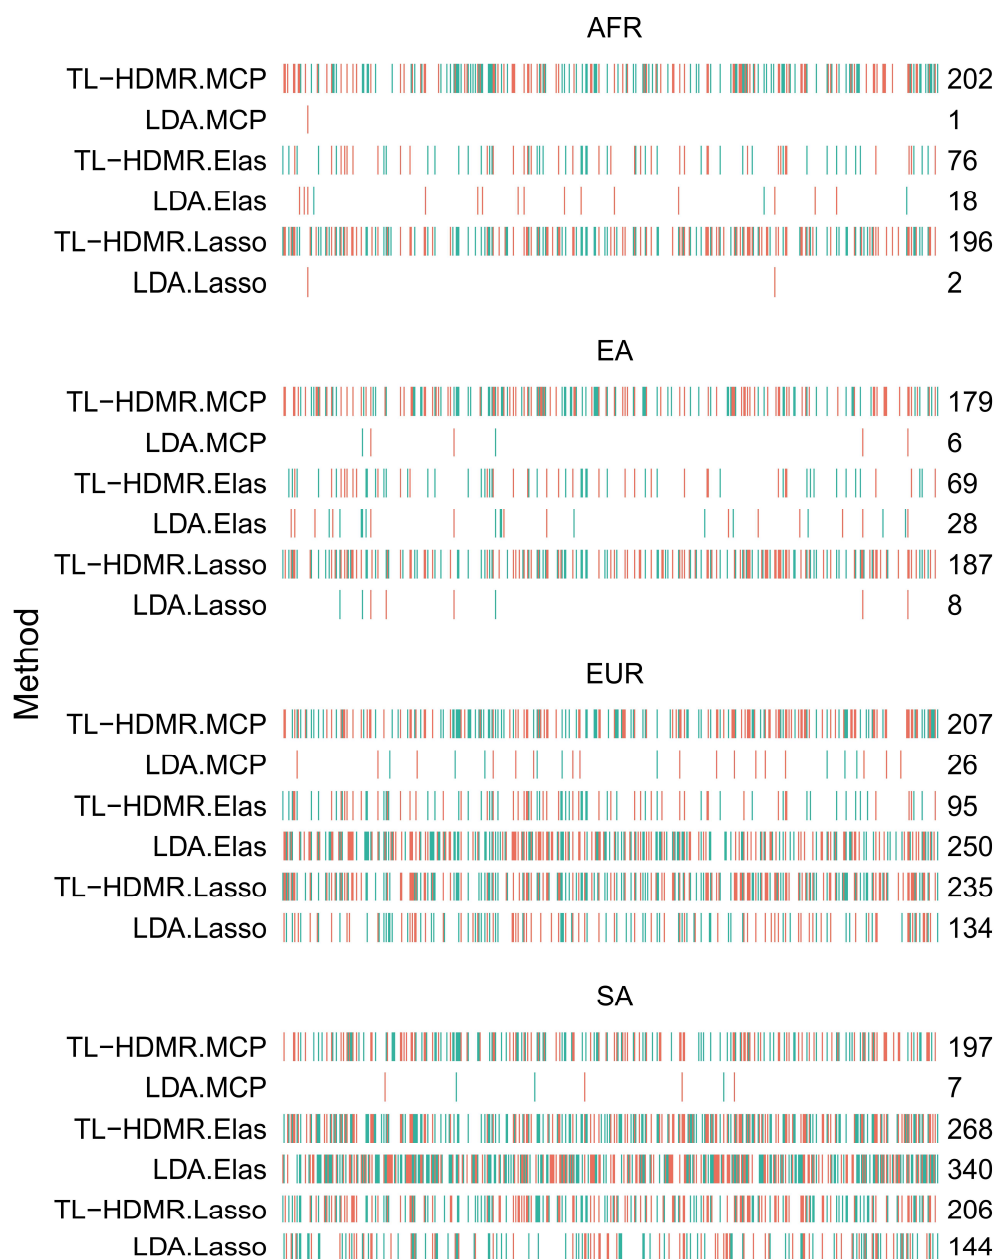

**Figure S21. The number of causal metabolites in application (Ischemic stroke).**

## Ischemic stroke

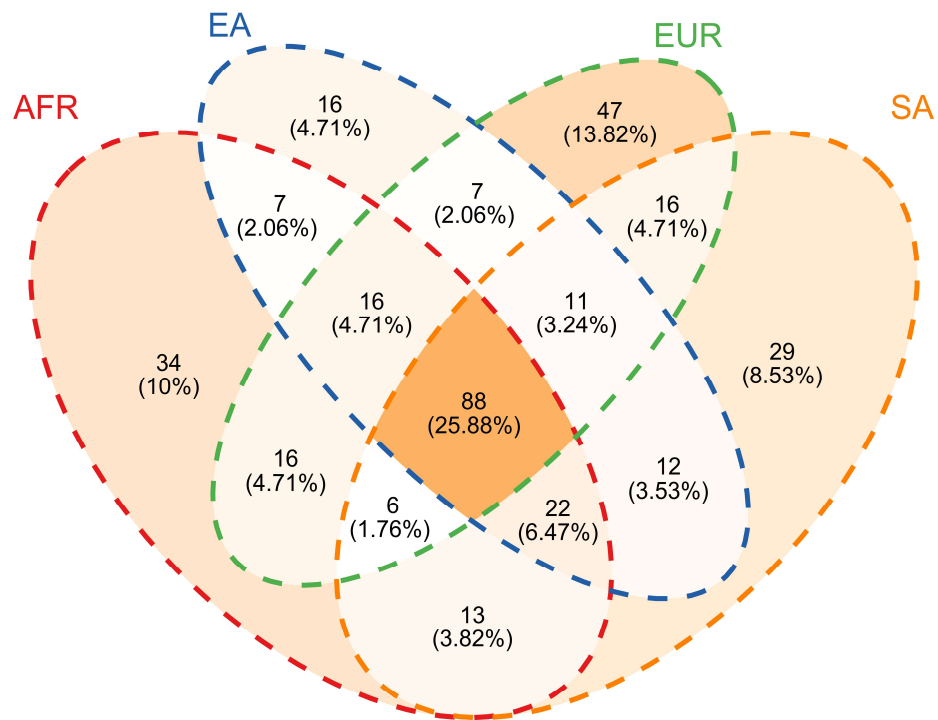

**Figure S22. Difference of causal metabolites among four ethnics (Ischemic stroke).**

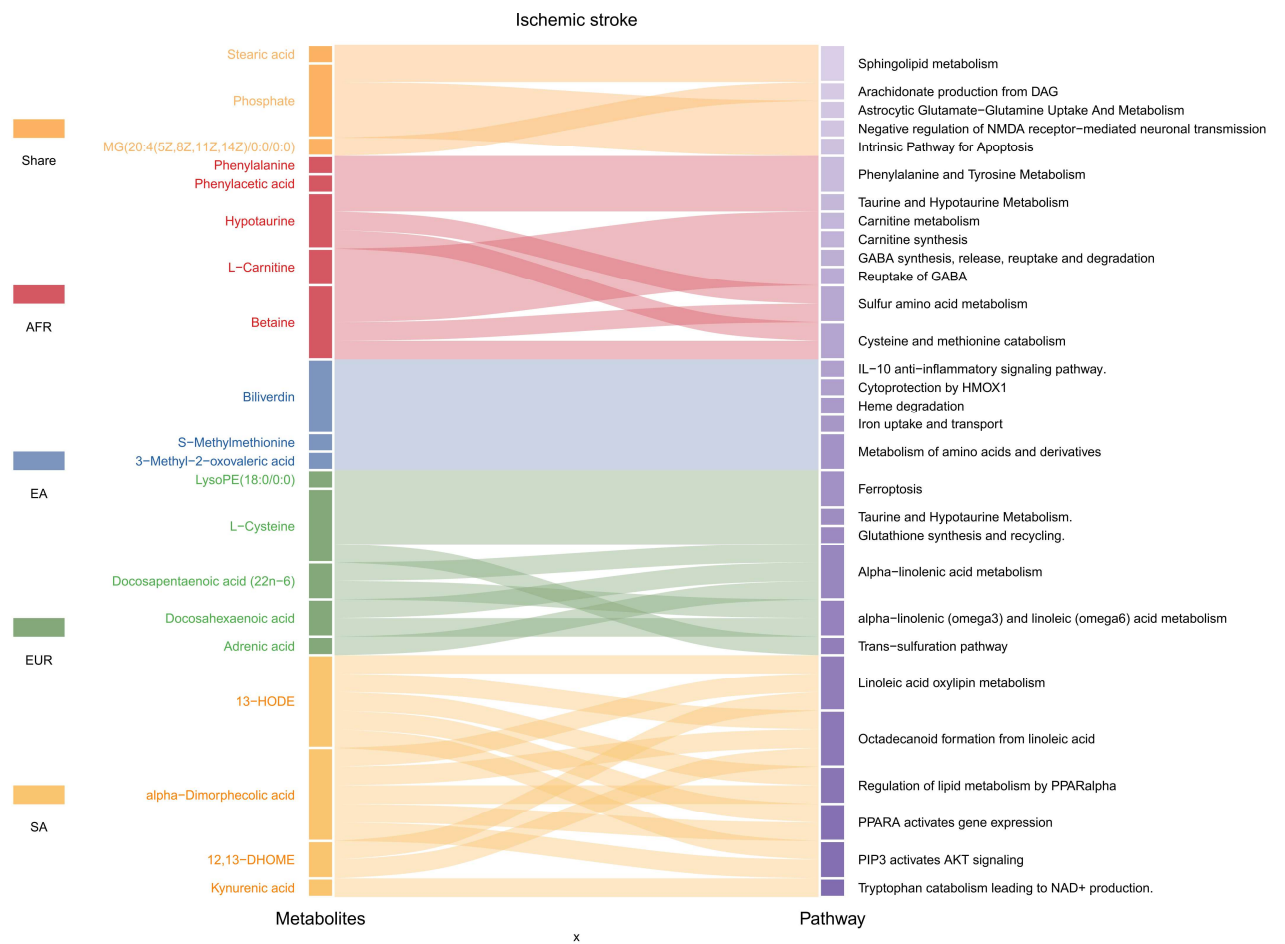

**Figure S23. Enrichment results causal metabolites for four ethnics (Ischemic stroke).**

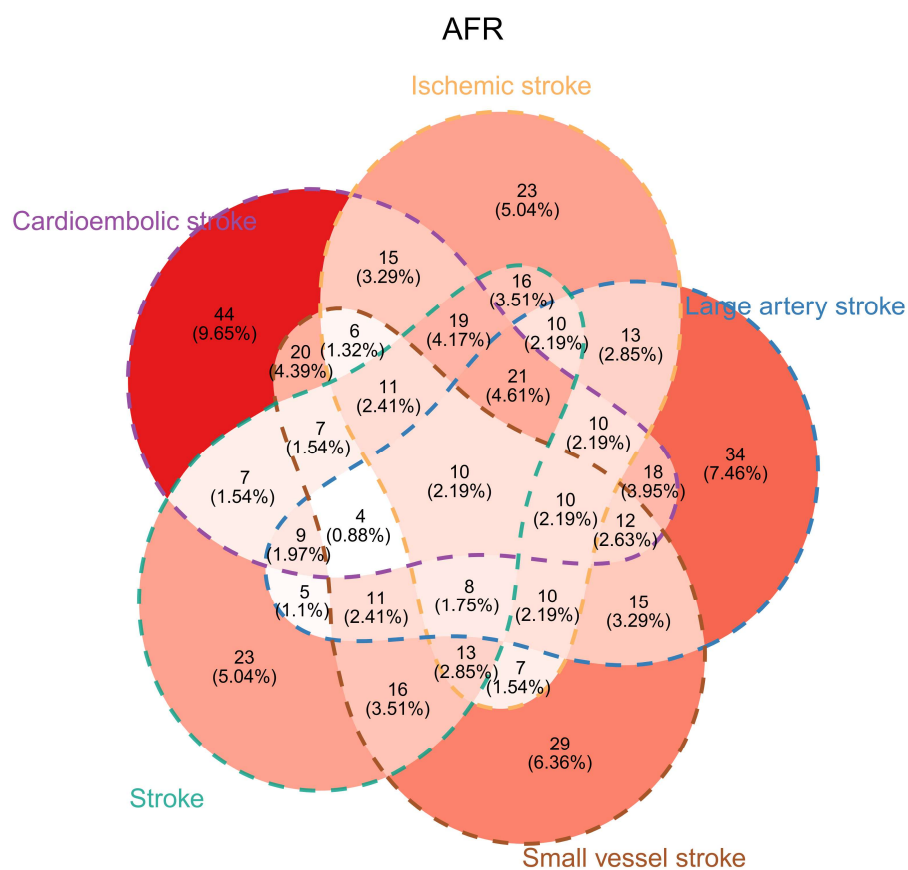

**Figure S24. Difference of causal metabolites among stroke and its four subtypes (AFR).**

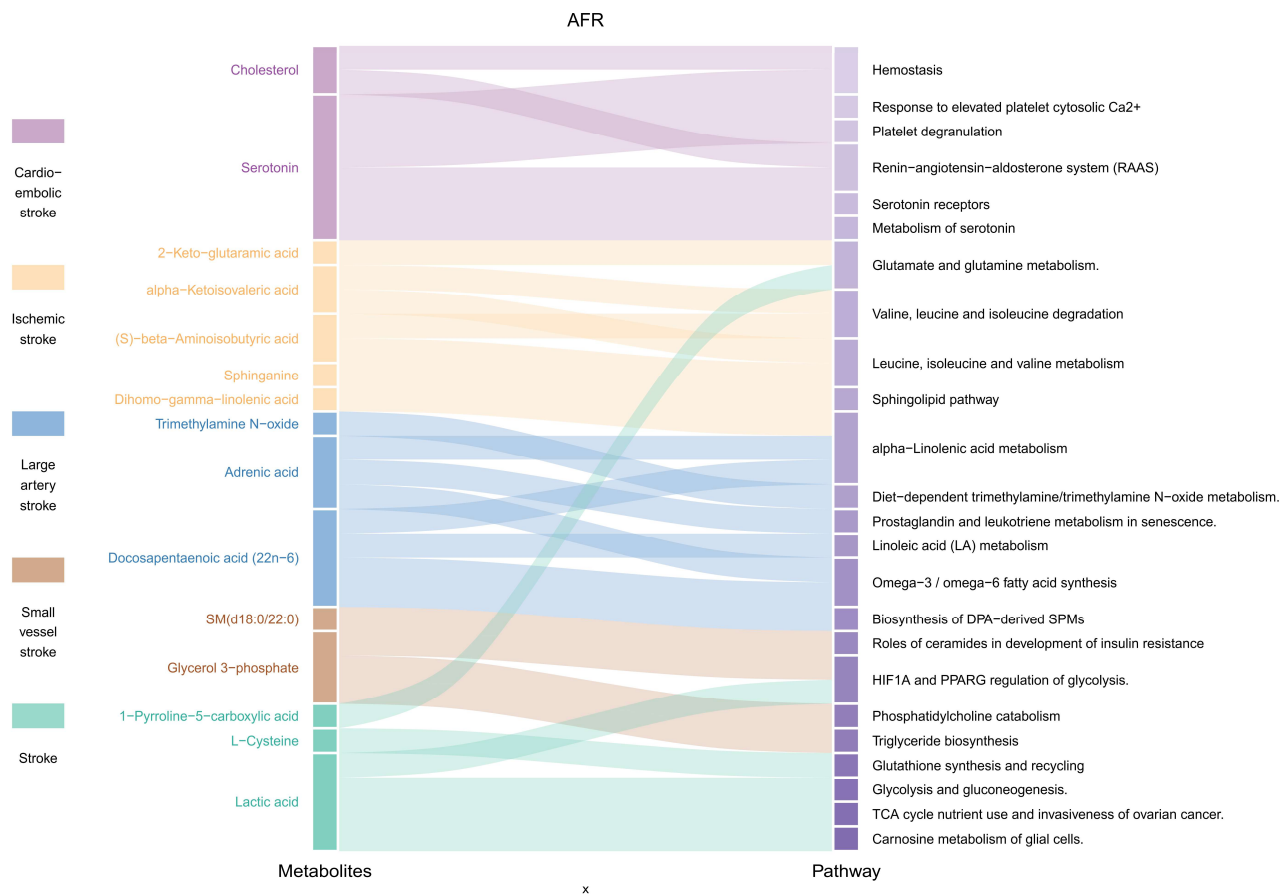

**Figure S25. Enrichment results causal metabolites for stroke and its four subtypes (AFR).**

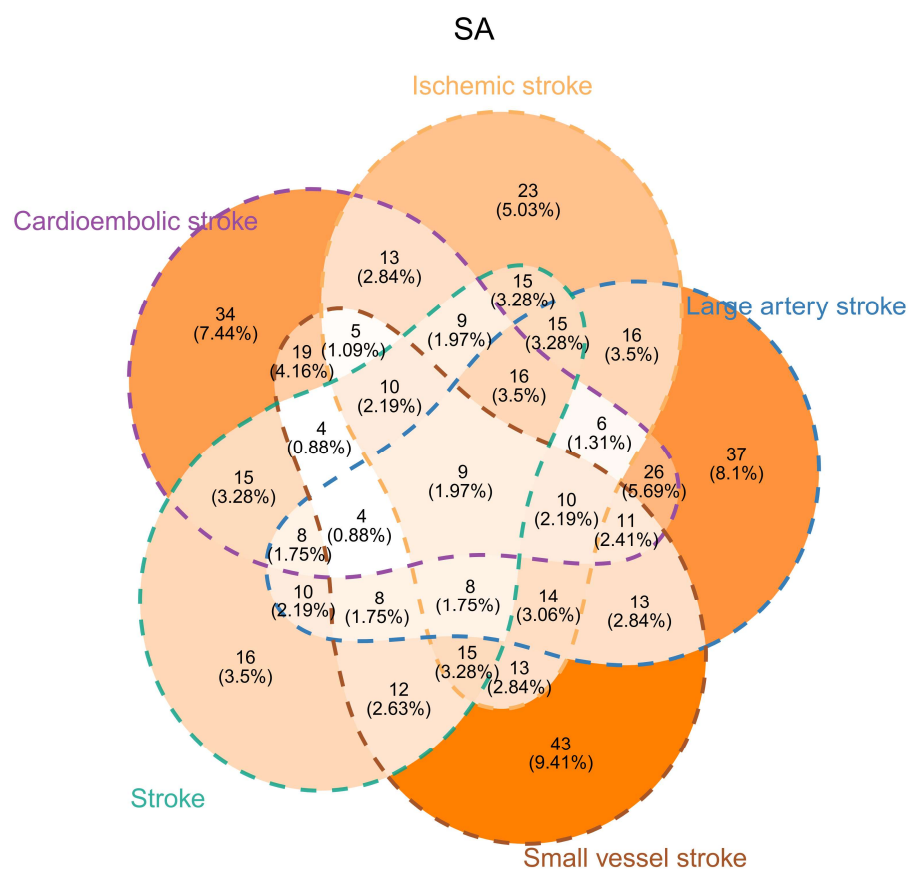

**Figure S26. Difference of causal metabolites among stroke and its four subtypes (SA).**



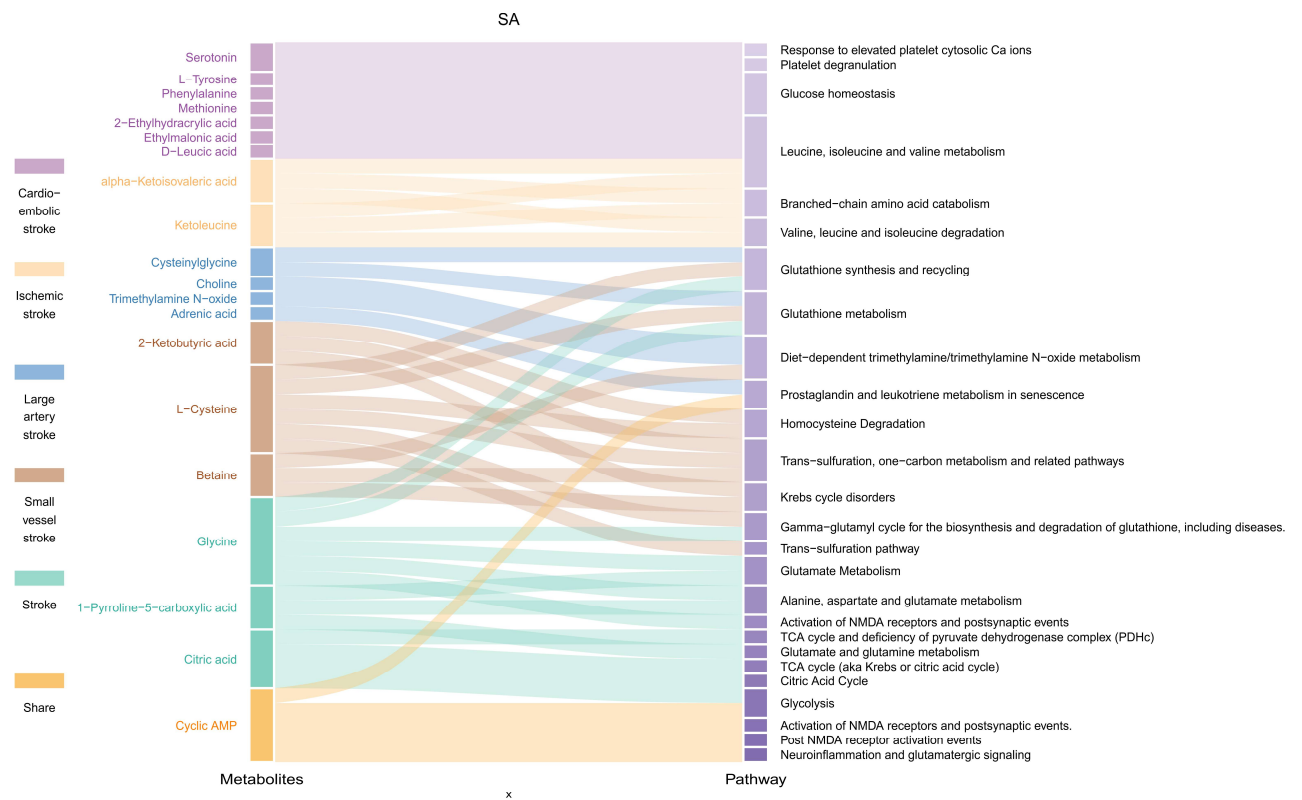

**Figure S27. Enrichment results causal metabolites for stroke and its four subtypes (SA).**

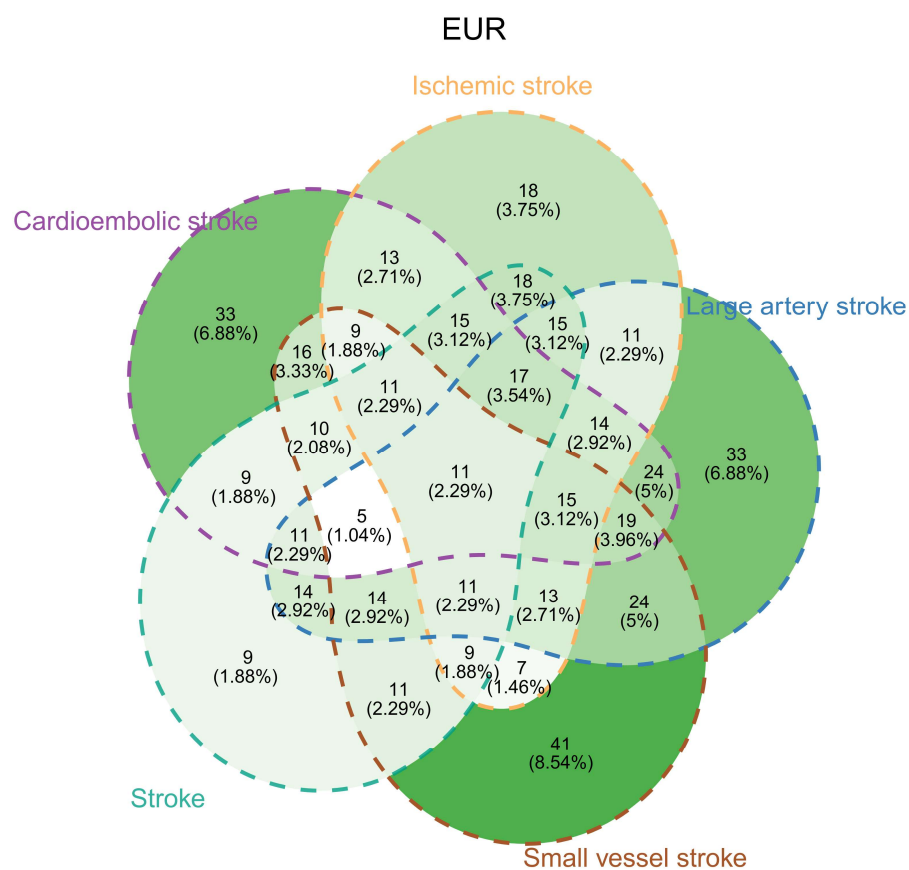

**Figure S28. Difference of causal metabolites among stroke and its four subtypes (EUR).**

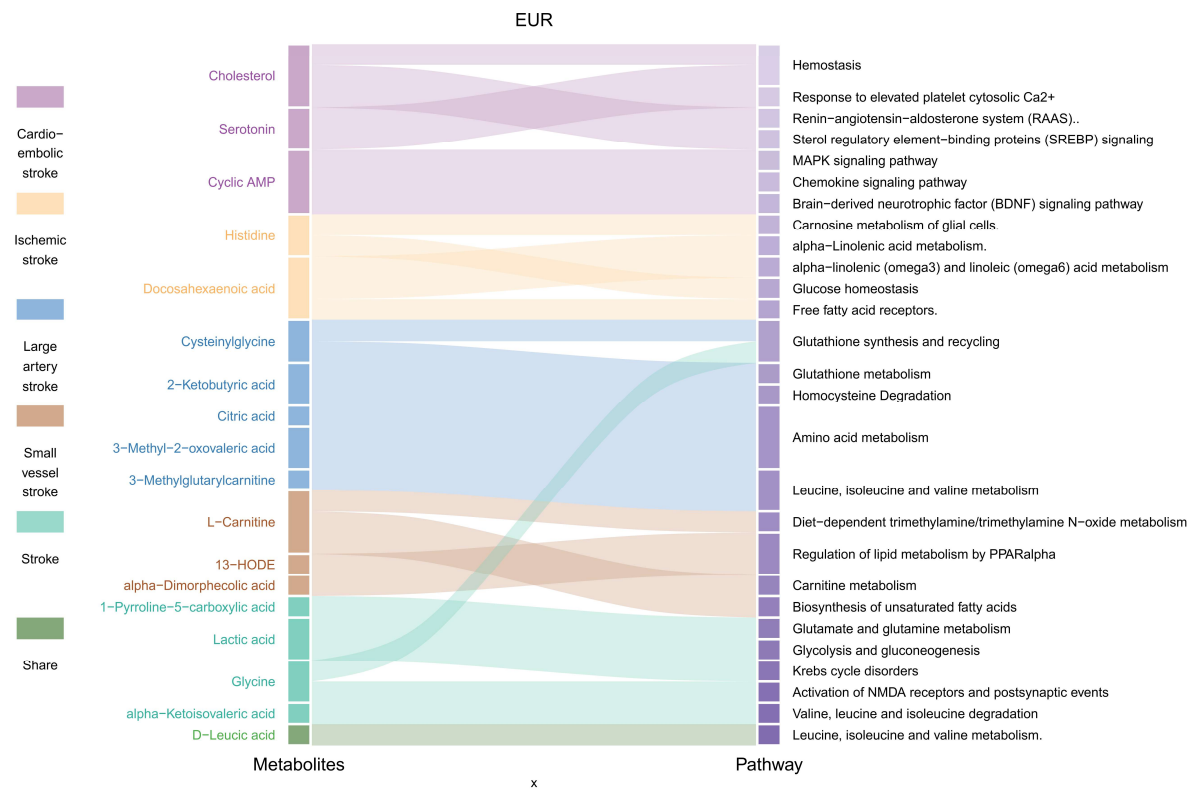

**Figure S29. Difference of causal metabolites among stroke and its four subtypes (EUR).**
