# Supplementary material for: Transfer Learning for Mendelian Randomization with Pleiotropic and Correlated High-Dimensional Exposures and Its Application to Trans-ethnic Populations
Source: Research Square preprint supplement (doi:10.21203/rs.3.rs-7712945/v1), 2025-10-01
Supplement: Supplementary file 1 [file f7ddba15d72b816cdcdc5ef3.xlsx]

## Sheet: Data 1
Supplementary Data 1. Datasets information for 899 metabolites
accessionId	reportedTrait	efoTraits	discoverySampleAncestry	summaryStatistics	pubmedId
GCST90201287	(16 or 17)-methylstearate (a19:0 or i19:0) levels	(16 or 17)-methylstearate (a19:0 or i19:0) measurement	59 African unspecified	http://ftp.ebi.ac.uk/pub/databases/gwas/summary_statistics/GCST90201001-GCST90202000/GCST90201287	36635386
GCST90202335	(16 or 17)-methylstearate (a19:0 or i19:0) levels	(16 or 17)-methylstearate (a19:0 or i19:0) measurement	103 East Asian	http://ftp.ebi.ac.uk/pub/databases/gwas/summary_statistics/GCST90202001-GCST90203000/GCST90202335	36635386
GCST90199887	(16 or 17)-methylstearate (a19:0 or i19:0) levels	(16 or 17)-methylstearate (a19:0 or i19:0) measurement	8239 European	http://ftp.ebi.ac.uk/pub/databases/gwas/summary_statistics/GCST90199001-GCST90200000/GCST90199887	36635386
GCST90203335	(16 or 17)-methylstearate (a19:0 or i19:0) levels	(16 or 17)-methylstearate (a19:0 or i19:0) measurement	108 South Asian	http://ftp.ebi.ac.uk/pub/databases/gwas/summary_statistics/GCST90203001-GCST90204000/GCST90203335	36635386
GCST90202703	(2 or 3)-decenoate (10:1n7 or n8) levels	(2 or 3)-decenoate (10:1n7 or n8) measurement	103 East Asian	http://ftp.ebi.ac.uk/pub/databases/gwas/summary_statistics/GCST90202001-GCST90203000/GCST90202703	36635386
GCST90201661	(2 or 3)-decenoate (10:1n7 or n8) levels	(2 or 3)-decenoate (10:1n7 or n8) measurement	57 African unspecified	http://ftp.ebi.ac.uk/pub/databases/gwas/summary_statistics/GCST90201001-GCST90202000/GCST90201661	36635386
GCST90200263	(2 or 3)-decenoate (10:1n7 or n8) levels	(2 or 3)-decenoate (10:1n7 or n8) measurement	8124 European	http://ftp.ebi.ac.uk/pub/databases/gwas/summary_statistics/GCST90200001-GCST90201000/GCST90200263	36635386
GCST90203684	(2 or 3)-decenoate (10:1n7 or n8) levels	(2 or 3)-decenoate (10:1n7 or n8) measurement	105 South Asian	http://ftp.ebi.ac.uk/pub/databases/gwas/summary_statistics/GCST90203001-GCST90204000/GCST90203684	36635386
GCST90200217	(2,4 or 2,5)-dimethylphenol sulfate levels	(2,4 or 2,5)-dimethylphenol sulfate measurement	5189 European	http://ftp.ebi.ac.uk/pub/databases/gwas/summary_statistics/GCST90200001-GCST90201000/GCST90200217	36635386
GCST90201555	(N(1) + N(8))-acetylspermidine levels	blood N(1)-acetylspermidine measurement,blood N(8)-acetylspermidine measurement	59 African unspecified	http://ftp.ebi.ac.uk/pub/databases/gwas/summary_statistics/GCST90201001-GCST90202000/GCST90201555	36635386
GCST90202595	(N(1) + N(8))-acetylspermidine levels	blood N(1)-acetylspermidine measurement,blood N(8)-acetylspermidine measurement	104 East Asian	http://ftp.ebi.ac.uk/pub/databases/gwas/summary_statistics/GCST90202001-GCST90203000/GCST90202595	36635386
GCST90200153	(N(1) + N(8))-acetylspermidine levels	blood N(1)-acetylspermidine measurement,blood N(8)-acetylspermidine measurement	8219 European	http://ftp.ebi.ac.uk/pub/databases/gwas/summary_statistics/GCST90200001-GCST90201000/GCST90200153	36635386
GCST90201332	(R)-3-hydroxybutyrylcarnitine levels	(R)-3-hydroxybutyrylcarnitine measurement	48 African unspecified	http://ftp.ebi.ac.uk/pub/databases/gwas/summary_statistics/GCST90201001-GCST90202000/GCST90201332	36635386
GCST90199930	(R)-3-hydroxybutyrylcarnitine levels	(R)-3-hydroxybutyrylcarnitine measurement	7787 European	http://ftp.ebi.ac.uk/pub/databases/gwas/summary_statistics/GCST90199001-GCST90200000/GCST90199930	36635386
GCST90203386	(R)-3-hydroxybutyrylcarnitine levels	(R)-3-hydroxybutyrylcarnitine measurement	104 South Asian	http://ftp.ebi.ac.uk/pub/databases/gwas/summary_statistics/GCST90203001-GCST90204000/GCST90203386	36635386
GCST90202375	(R)-3-hydroxybutyrylcarnitine levels	(R)-3-hydroxybutyrylcarnitine measurement	99 East Asian	http://ftp.ebi.ac.uk/pub/databases/gwas/summary_statistics/GCST90202001-GCST90203000/GCST90202375	36635386
GCST90200088	(S)-3-hydroxybutyrylcarnitine levels	(S)-3-hydroxybutyrylcarnitine measurement	8249 European	http://ftp.ebi.ac.uk/pub/databases/gwas/summary_statistics/GCST90200001-GCST90201000/GCST90200088	36635386
GCST90201492	(S)-3-hydroxybutyrylcarnitine levels	(S)-3-hydroxybutyrylcarnitine measurement	60 African unspecified	http://ftp.ebi.ac.uk/pub/databases/gwas/summary_statistics/GCST90201001-GCST90202000/GCST90201492	36635386
GCST90203515	(S)-3-hydroxybutyrylcarnitine levels	(S)-3-hydroxybutyrylcarnitine measurement	108 South Asian	http://ftp.ebi.ac.uk/pub/databases/gwas/summary_statistics/GCST90203001-GCST90204000/GCST90203515	36635386
GCST90202531	(S)-3-hydroxybutyrylcarnitine levels	(S)-3-hydroxybutyrylcarnitine measurement	103 East Asian	http://ftp.ebi.ac.uk/pub/databases/gwas/summary_statistics/GCST90202001-GCST90203000/GCST90202531	36635386
GCST90202686	(S)-a-amino-omega-caprolactam levels	(S)-a-amino-omega-caprolactam measurement	104 East Asian	http://ftp.ebi.ac.uk/pub/databases/gwas/summary_statistics/GCST90202001-GCST90203000/GCST90202686	36635386
GCST90201665	(S)-a-amino-omega-caprolactam levels	(S)-a-amino-omega-caprolactam measurement	60 African unspecified	http://ftp.ebi.ac.uk/pub/databases/gwas/summary_statistics/GCST90201001-GCST90202000/GCST90201665	36635386
GCST90200254	(S)-a-amino-omega-caprolactam levels	(S)-a-amino-omega-caprolactam measurement	8185 European	http://ftp.ebi.ac.uk/pub/databases/gwas/summary_statistics/GCST90200001-GCST90201000/GCST90200254	36635386
GCST90203688	(S)-a-amino-omega-caprolactam levels	(S)-a-amino-omega-caprolactam measurement	108 South Asian	http://ftp.ebi.ac.uk/pub/databases/gwas/summary_statistics/GCST90203001-GCST90204000/GCST90203688	36635386
GCST90199966	1-(1-enyl-oleoyl)-GPE (p-18:1) levels	1-(1-enyl-oleoyl)-GPE (P-18:1) measurement	8157 European	http://ftp.ebi.ac.uk/pub/databases/gwas/summary_statistics/GCST90199001-GCST90200000/GCST90199966	36635386
GCST90203402	1-(1-enyl-oleoyl)-GPE (p-18:1) levels	1-(1-enyl-oleoyl)-GPE (P-18:1) measurement	107 South Asian	http://ftp.ebi.ac.uk/pub/databases/gwas/summary_statistics/GCST90203001-GCST90204000/GCST90203402	36635386
GCST90202404	1-(1-enyl-oleoyl)-GPE (p-18:1) levels	1-(1-enyl-oleoyl)-GPE (P-18:1) measurement	104 East Asian	http://ftp.ebi.ac.uk/pub/databases/gwas/summary_statistics/GCST90202001-GCST90203000/GCST90202404	36635386
GCST90201368	1-(1-enyl-oleoyl)-GPE (p-18:1) levels	1-(1-enyl-oleoyl)-GPE (P-18:1) measurement	58 African unspecified	http://ftp.ebi.ac.uk/pub/databases/gwas/summary_statistics/GCST90201001-GCST90202000/GCST90201368	36635386
GCST90200052	1-(1-enyl-palmitoyl)-2-arachidonoyl-gpc (p-16:0/20:4) levels	1-(1-enyl-palmitoyl)-2-arachidonoyl-GPC (P-16:0/20:4) measurement	8251 European	http://ftp.ebi.ac.uk/pub/databases/gwas/summary_statistics/GCST90200001-GCST90201000/GCST90200052	36635386
GCST90201467	1-(1-enyl-palmitoyl)-2-arachidonoyl-gpc (p-16:0/20:4) levels	1-(1-enyl-palmitoyl)-2-arachidonoyl-GPC (P-16:0/20:4) measurement	59 African unspecified	http://ftp.ebi.ac.uk/pub/databases/gwas/summary_statistics/GCST90201001-GCST90202000/GCST90201467	36635386
GCST90202498	1-(1-enyl-palmitoyl)-2-arachidonoyl-gpc (p-16:0/20:4) levels	1-(1-enyl-palmitoyl)-2-arachidonoyl-GPC (P-16:0/20:4) measurement	104 East Asian	http://ftp.ebi.ac.uk/pub/databases/gwas/summary_statistics/GCST90202001-GCST90203000/GCST90202498	36635386
GCST90200048	1-(1-enyl-palmitoyl)-2-arachidonoyl-GPE (p-16:0/20:4) levels	1-(1-enyl-palmitoyl)-2-arachidonoyl-GPE (P-16:0/20:4) measurement	8262 European	http://ftp.ebi.ac.uk/pub/databases/gwas/summary_statistics/GCST90200001-GCST90201000/GCST90200048	36635386
GCST90201465	1-(1-enyl-palmitoyl)-2-arachidonoyl-GPE (p-16:0/20:4) levels	1-(1-enyl-palmitoyl)-2-arachidonoyl-GPE (P-16:0/20:4) measurement	60 African unspecified	http://ftp.ebi.ac.uk/pub/databases/gwas/summary_statistics/GCST90201001-GCST90202000/GCST90201465	36635386
GCST90203498	1-(1-enyl-palmitoyl)-2-arachidonoyl-GPE (p-16:0/20:4) levels	1-(1-enyl-palmitoyl)-2-arachidonoyl-GPE (P-16:0/20:4) measurement	108 South Asian	http://ftp.ebi.ac.uk/pub/databases/gwas/summary_statistics/GCST90203001-GCST90204000/GCST90203498	36635386
GCST90202501	1-(1-enyl-palmitoyl)-2-arachidonoyl-GPE (p-16:0/20:4) levels	1-(1-enyl-palmitoyl)-2-arachidonoyl-GPE (P-16:0/20:4) measurement	104 East Asian	http://ftp.ebi.ac.uk/pub/databases/gwas/summary_statistics/GCST90202001-GCST90203000/GCST90202501	36635386
GCST90200060	1-(1-enyl-palmitoyl)-2-linoleoyl-GPC (p-16:0/18:2) levels	1-(1-enyl-palmitoyl)-2-linoleoyl-GPC (P-16:0/18:2) measurement	8260 European	http://ftp.ebi.ac.uk/pub/databases/gwas/summary_statistics/GCST90200001-GCST90201000/GCST90200060	36635386
GCST90201472	1-(1-enyl-palmitoyl)-2-linoleoyl-GPC (p-16:0/18:2) levels	1-(1-enyl-palmitoyl)-2-linoleoyl-GPC (P-16:0/18:2) measurement	60 African unspecified	http://ftp.ebi.ac.uk/pub/databases/gwas/summary_statistics/GCST90201001-GCST90202000/GCST90201472	36635386
GCST90203502	1-(1-enyl-palmitoyl)-2-linoleoyl-GPC (p-16:0/18:2) levels	1-(1-enyl-palmitoyl)-2-linoleoyl-GPC (P-16:0/18:2) measurement	107 South Asian	http://ftp.ebi.ac.uk/pub/databases/gwas/summary_statistics/GCST90203001-GCST90204000/GCST90203502	36635386
GCST90202504	1-(1-enyl-palmitoyl)-2-linoleoyl-GPC (p-16:0/18:2) levels	1-(1-enyl-palmitoyl)-2-linoleoyl-GPC (P-16:0/18:2) measurement	103 East Asian	http://ftp.ebi.ac.uk/pub/databases/gwas/summary_statistics/GCST90202001-GCST90203000/GCST90202504	36635386
GCST90200075	1-(1-enyl-palmitoyl)-2-linoleoyl-GPE (p-16:0/18:2) levels	1-(1-enyl-palmitoyl)-2-linoleoyl-GPE (P-16:0/18:2) measurement	8254 European	http://ftp.ebi.ac.uk/pub/databases/gwas/summary_statistics/GCST90200001-GCST90201000/GCST90200075	36635386
GCST90201479	1-(1-enyl-palmitoyl)-2-linoleoyl-GPE (p-16:0/18:2) levels	1-(1-enyl-palmitoyl)-2-linoleoyl-GPE (P-16:0/18:2) measurement	60 African unspecified	http://ftp.ebi.ac.uk/pub/databases/gwas/summary_statistics/GCST90201001-GCST90202000/GCST90201479	36635386
GCST90203521	1-(1-enyl-palmitoyl)-2-linoleoyl-GPE (p-16:0/18:2) levels	1-(1-enyl-palmitoyl)-2-linoleoyl-GPE (P-16:0/18:2) measurement	108 South Asian	http://ftp.ebi.ac.uk/pub/databases/gwas/summary_statistics/GCST90203001-GCST90204000/GCST90203521	36635386
GCST90202509	1-(1-enyl-palmitoyl)-2-linoleoyl-GPE (p-16:0/18:2) levels	1-(1-enyl-palmitoyl)-2-linoleoyl-GPE (P-16:0/18:2) measurement	104 East Asian	http://ftp.ebi.ac.uk/pub/databases/gwas/summary_statistics/GCST90202001-GCST90203000/GCST90202509	36635386
GCST90200057	1-(1-enyl-palmitoyl)-2-oleoyl-gpc (p-16:0/18:1) levels	1-(1-enyl-palmitoyl)-2-oleoyl-GPC (P-16:0/18:1) measurement	8222 European	http://ftp.ebi.ac.uk/pub/databases/gwas/summary_statistics/GCST90200001-GCST90201000/GCST90200057	36635386
GCST90201466	1-(1-enyl-palmitoyl)-2-oleoyl-gpc (p-16:0/18:1) levels	1-(1-enyl-palmitoyl)-2-oleoyl-GPC (P-16:0/18:1) measurement	60 African unspecified	http://ftp.ebi.ac.uk/pub/databases/gwas/summary_statistics/GCST90201001-GCST90202000/GCST90201466	36635386
GCST90203493	1-(1-enyl-palmitoyl)-2-oleoyl-gpc (p-16:0/18:1) levels	1-(1-enyl-palmitoyl)-2-oleoyl-GPC (P-16:0/18:1) measurement	106 South Asian	http://ftp.ebi.ac.uk/pub/databases/gwas/summary_statistics/GCST90203001-GCST90204000/GCST90203493	36635386
GCST90202505	1-(1-enyl-palmitoyl)-2-oleoyl-gpc (p-16:0/18:1) levels	1-(1-enyl-palmitoyl)-2-oleoyl-GPC (P-16:0/18:1) measurement	104 East Asian	http://ftp.ebi.ac.uk/pub/databases/gwas/summary_statistics/GCST90202001-GCST90203000/GCST90202505	36635386
GCST90200061	1-(1-enyl-palmitoyl)-2-oleoyl-GPE (p-16:0/18:1) levels	1-(1-enyl-palmitoyl)-2-oleoyl-GPE (P-16:0/18:1) measurement	8264 European	http://ftp.ebi.ac.uk/pub/databases/gwas/summary_statistics/GCST90200001-GCST90201000/GCST90200061	36635386
GCST90201464	1-(1-enyl-palmitoyl)-2-oleoyl-GPE (p-16:0/18:1) levels	1-(1-enyl-palmitoyl)-2-oleoyl-GPE (P-16:0/18:1) measurement	60 African unspecified	http://ftp.ebi.ac.uk/pub/databases/gwas/summary_statistics/GCST90201001-GCST90202000/GCST90201464	36635386
GCST90203492	1-(1-enyl-palmitoyl)-2-oleoyl-GPE (p-16:0/18:1) levels	1-(1-enyl-palmitoyl)-2-oleoyl-GPE (P-16:0/18:1) measurement	108 South Asian	http://ftp.ebi.ac.uk/pub/databases/gwas/summary_statistics/GCST90203001-GCST90204000/GCST90203492	36635386
GCST90202502	1-(1-enyl-palmitoyl)-2-oleoyl-GPE (p-16:0/18:1) levels	1-(1-enyl-palmitoyl)-2-oleoyl-GPE (P-16:0/18:1) measurement	104 East Asian	http://ftp.ebi.ac.uk/pub/databases/gwas/summary_statistics/GCST90202001-GCST90203000/GCST90202502	36635386
GCST90200070	1-(1-enyl-palmitoyl)-2-palmitoleoyl-GPC (P-16:0/16:1) levels	1-(1-enyl-palmitoyl)-2-palmitoleoyl-GPC (P-16:0/16:1) measurement	8083 European	http://ftp.ebi.ac.uk/pub/databases/gwas/summary_statistics/GCST90200001-GCST90201000/GCST90200070	36635386
GCST90201481	1-(1-enyl-palmitoyl)-2-palmitoleoyl-GPC (P-16:0/16:1) levels	1-(1-enyl-palmitoyl)-2-palmitoleoyl-GPC (P-16:0/16:1) measurement	58 African unspecified	http://ftp.ebi.ac.uk/pub/databases/gwas/summary_statistics/GCST90201001-GCST90202000/GCST90201481	36635386
GCST90203522	1-(1-enyl-palmitoyl)-2-palmitoleoyl-GPC (P-16:0/16:1) levels	1-(1-enyl-palmitoyl)-2-palmitoleoyl-GPC (P-16:0/16:1) measurement	104 South Asian	http://ftp.ebi.ac.uk/pub/databases/gwas/summary_statistics/GCST90203001-GCST90204000/GCST90203522	36635386
GCST90202521	1-(1-enyl-palmitoyl)-2-palmitoleoyl-GPC (P-16:0/16:1) levels	1-(1-enyl-palmitoyl)-2-palmitoleoyl-GPC (P-16:0/16:1) measurement	103 East Asian	http://ftp.ebi.ac.uk/pub/databases/gwas/summary_statistics/GCST90202001-GCST90203000/GCST90202521	36635386
GCST90200083	1-(1-enyl-palmitoyl)-2-palmitoyl-GPC (P-16:0/16:0) levels	1-(1-enyl-palmitoyl)-2-palmitoyl-GPC (P-16:0/16:0) measurement	8266 European	http://ftp.ebi.ac.uk/pub/databases/gwas/summary_statistics/GCST90200001-GCST90201000/GCST90200083	36635386
GCST90201483	1-(1-enyl-palmitoyl)-2-palmitoyl-GPC (P-16:0/16:0) levels	1-(1-enyl-palmitoyl)-2-palmitoyl-GPC (P-16:0/16:0) measurement	59 African unspecified	http://ftp.ebi.ac.uk/pub/databases/gwas/summary_statistics/GCST90201001-GCST90202000/GCST90201483	36635386
GCST90203518	1-(1-enyl-palmitoyl)-2-palmitoyl-GPC (P-16:0/16:0) levels	1-(1-enyl-palmitoyl)-2-palmitoyl-GPC (P-16:0/16:0) measurement	108 South Asian	http://ftp.ebi.ac.uk/pub/databases/gwas/summary_statistics/GCST90203001-GCST90204000/GCST90203518	36635386
GCST90202514	1-(1-enyl-palmitoyl)-2-palmitoyl-GPC (P-16:0/16:0) levels	1-(1-enyl-palmitoyl)-2-palmitoyl-GPC (P-16:0/16:0) measurement	104 East Asian	http://ftp.ebi.ac.uk/pub/databases/gwas/summary_statistics/GCST90202001-GCST90203000/GCST90202514	36635386
GCST90201304	1-(1-enyl-palmitoyl)-GPC (p-16:0) levels	1-(1-enyl-palmitoyl)-GPC (P-16:0) measurement	58 African unspecified	http://ftp.ebi.ac.uk/pub/databases/gwas/summary_statistics/GCST90201001-GCST90202000/GCST90201304	36635386
GCST90202356	1-(1-enyl-palmitoyl)-GPC (p-16:0) levels	1-(1-enyl-palmitoyl)-GPC (P-16:0) measurement	101 East Asian	http://ftp.ebi.ac.uk/pub/databases/gwas/summary_statistics/GCST90202001-GCST90203000/GCST90202356	36635386
GCST90199899	1-(1-enyl-palmitoyl)-GPC (p-16:0) levels	1-(1-enyl-palmitoyl)-GPC (P-16:0) measurement	8170 European	http://ftp.ebi.ac.uk/pub/databases/gwas/summary_statistics/GCST90199001-GCST90200000/GCST90199899	36635386
GCST90203365	1-(1-enyl-palmitoyl)-GPC (p-16:0) levels	1-(1-enyl-palmitoyl)-GPC (P-16:0) measurement	107 South Asian	http://ftp.ebi.ac.uk/pub/databases/gwas/summary_statistics/GCST90203001-GCST90204000/GCST90203365	36635386
GCST90201305	1-(1-enyl-palmitoyl)-GPE (p-16:0) levels	1-(1-enyl-palmitoyl)-GPE (P-16:0) measurement	59 African unspecified	http://ftp.ebi.ac.uk/pub/databases/gwas/summary_statistics/GCST90201001-GCST90202000/GCST90201305	36635386
GCST90202362	1-(1-enyl-palmitoyl)-GPE (p-16:0) levels	1-(1-enyl-palmitoyl)-GPE (P-16:0) measurement	104 East Asian	http://ftp.ebi.ac.uk/pub/databases/gwas/summary_statistics/GCST90202001-GCST90203000/GCST90202362	36635386
GCST90199906	1-(1-enyl-palmitoyl)-GPE (p-16:0) levels	1-(1-enyl-palmitoyl)-GPE (P-16:0) measurement	8227 European	http://ftp.ebi.ac.uk/pub/databases/gwas/summary_statistics/GCST90199001-GCST90200000/GCST90199906	36635386
GCST90203368	1-(1-enyl-palmitoyl)-GPE (p-16:0) levels	1-(1-enyl-palmitoyl)-GPE (P-16:0) measurement	108 South Asian	http://ftp.ebi.ac.uk/pub/databases/gwas/summary_statistics/GCST90203001-GCST90204000/GCST90203368	36635386
GCST90200058	1-(1-enyl-stearoyl)-2-arachidonoyl-GPE (p-18:0/20:4) levels	1-(1-enyl-stearoyl)-2-arachidonoyl-GPE (P-18:0/20:4) measurement	8254 European	http://ftp.ebi.ac.uk/pub/databases/gwas/summary_statistics/GCST90200001-GCST90201000/GCST90200058	36635386
GCST90201463	1-(1-enyl-stearoyl)-2-arachidonoyl-GPE (p-18:0/20:4) levels	1-(1-enyl-stearoyl)-2-arachidonoyl-GPE (P-18:0/20:4) measurement	60 African unspecified	http://ftp.ebi.ac.uk/pub/databases/gwas/summary_statistics/GCST90201001-GCST90202000/GCST90201463	36635386
GCST90202487	1-(1-enyl-stearoyl)-2-arachidonoyl-GPE (p-18:0/20:4) levels	1-(1-enyl-stearoyl)-2-arachidonoyl-GPE (P-18:0/20:4) measurement	104 East Asian	http://ftp.ebi.ac.uk/pub/databases/gwas/summary_statistics/GCST90202001-GCST90203000/GCST90202487	36635386
GCST90200076	1-(1-enyl-stearoyl)-2-linoleoyl-GPE (p-18:0/18:2) levels	1-(1-enyl-stearoyl)-2-linoleoyl-GPE (P-18:0/18:2)* measurement	8261 European	http://ftp.ebi.ac.uk/pub/databases/gwas/summary_statistics/GCST90200001-GCST90201000/GCST90200076	36635386
GCST90201490	1-(1-enyl-stearoyl)-2-linoleoyl-GPE (p-18:0/18:2) levels	1-(1-enyl-stearoyl)-2-linoleoyl-GPE (P-18:0/18:2)* measurement	60 African unspecified	http://ftp.ebi.ac.uk/pub/databases/gwas/summary_statistics/GCST90201001-GCST90202000/GCST90201490	36635386
GCST90203520	1-(1-enyl-stearoyl)-2-linoleoyl-GPE (p-18:0/18:2) levels	1-(1-enyl-stearoyl)-2-linoleoyl-GPE (P-18:0/18:2)* measurement	108 South Asian	http://ftp.ebi.ac.uk/pub/databases/gwas/summary_statistics/GCST90203001-GCST90204000/GCST90203520	36635386
GCST90202525	1-(1-enyl-stearoyl)-2-linoleoyl-GPE (p-18:0/18:2) levels	1-(1-enyl-stearoyl)-2-linoleoyl-GPE (P-18:0/18:2)* measurement	103 East Asian	http://ftp.ebi.ac.uk/pub/databases/gwas/summary_statistics/GCST90202001-GCST90203000/GCST90202525	36635386
GCST90200044	1-(1-enyl-stearoyl)-2-oleoyl-GPE (p-18:0/18:1) levels	1-(1-enyl-stearoyl)-2-oleoyl-GPE (P-18:0/18:1) measurement	8258 European	http://ftp.ebi.ac.uk/pub/databases/gwas/summary_statistics/GCST90200001-GCST90201000/GCST90200044	36635386
GCST90201441	1-(1-enyl-stearoyl)-2-oleoyl-GPE (p-18:0/18:1) levels	1-(1-enyl-stearoyl)-2-oleoyl-GPE (P-18:0/18:1) measurement	60 African unspecified	http://ftp.ebi.ac.uk/pub/databases/gwas/summary_statistics/GCST90201001-GCST90202000/GCST90201441	36635386
GCST90203482	1-(1-enyl-stearoyl)-2-oleoyl-GPE (p-18:0/18:1) levels	1-(1-enyl-stearoyl)-2-oleoyl-GPE (P-18:0/18:1) measurement	108 South Asian	http://ftp.ebi.ac.uk/pub/databases/gwas/summary_statistics/GCST90203001-GCST90204000/GCST90203482	36635386
GCST90202466	1-(1-enyl-stearoyl)-2-oleoyl-GPE (p-18:0/18:1) levels	1-(1-enyl-stearoyl)-2-oleoyl-GPE (P-18:0/18:1) measurement	104 East Asian	http://ftp.ebi.ac.uk/pub/databases/gwas/summary_statistics/GCST90202001-GCST90203000/GCST90202466	36635386
GCST90201308	1-(1-enyl-stearoyl)-GPE (p-18:0) levels	1-(1-enyl-stearoyl)-GPE (P-18:0) measurement	59 African unspecified	http://ftp.ebi.ac.uk/pub/databases/gwas/summary_statistics/GCST90201001-GCST90202000/GCST90201308	36635386
GCST90202345	1-(1-enyl-stearoyl)-GPE (p-18:0) levels	1-(1-enyl-stearoyl)-GPE (P-18:0) measurement	104 East Asian	http://ftp.ebi.ac.uk/pub/databases/gwas/summary_statistics/GCST90202001-GCST90203000/GCST90202345	36635386
GCST90199910	1-(1-enyl-stearoyl)-GPE (p-18:0) levels	1-(1-enyl-stearoyl)-GPE (P-18:0) measurement	8249 European	http://ftp.ebi.ac.uk/pub/databases/gwas/summary_statistics/GCST90199001-GCST90200000/GCST90199910	36635386
GCST90203355	1-(1-enyl-stearoyl)-GPE (p-18:0) levels	1-(1-enyl-stearoyl)-GPE (P-18:0) measurement	108 South Asian	http://ftp.ebi.ac.uk/pub/databases/gwas/summary_statistics/GCST90203001-GCST90204000/GCST90203355	36635386
GCST90200006	1,2,3-benzenetriol sulfate (2) levels	1,2,3-benzenetriol sulfate (2) measurement	7484 European	http://ftp.ebi.ac.uk/pub/databases/gwas/summary_statistics/GCST90200001-GCST90201000/GCST90200006	36635386
GCST90201423	1,2,3-benzenetriol sulfate (2) levels	1,2,3-benzenetriol sulfate (2) measurement	50 African unspecified	http://ftp.ebi.ac.uk/pub/databases/gwas/summary_statistics/GCST90201001-GCST90202000/GCST90201423	36635386
GCST90203470	1,2,3-benzenetriol sulfate (2) levels	1,2,3-benzenetriol sulfate (2) measurement	100 South Asian	http://ftp.ebi.ac.uk/pub/databases/gwas/summary_statistics/GCST90203001-GCST90204000/GCST90203470	36635386
GCST90202447	1,2,3-benzenetriol sulfate (2) levels	1,2,3-benzenetriol sulfate (2) measurement	93 East Asian	http://ftp.ebi.ac.uk/pub/databases/gwas/summary_statistics/GCST90202001-GCST90203000/GCST90202447	36635386
GCST90200030	1,2-dilinoleoyl-GPC (18:2/18:2) levels	1,2-dilinoleoyl-GPC (18:2/18:2) measurement	8227 European	http://ftp.ebi.ac.uk/pub/databases/gwas/summary_statistics/GCST90200001-GCST90201000/GCST90200030	36635386
GCST90201438	1,2-dilinoleoyl-GPC (18:2/18:2) levels	1,2-dilinoleoyl-GPC (18:2/18:2) measurement	60 African unspecified	http://ftp.ebi.ac.uk/pub/databases/gwas/summary_statistics/GCST90201001-GCST90202000/GCST90201438	36635386
GCST90203480	1,2-dilinoleoyl-GPC (18:2/18:2) levels	1,2-dilinoleoyl-GPC (18:2/18:2) measurement	107 South Asian	http://ftp.ebi.ac.uk/pub/databases/gwas/summary_statistics/GCST90203001-GCST90204000/GCST90203480	36635386
GCST90200068	1,2-dilinoleoyl-GPE (18:2/18:2) levels	metabolite measurement	6804 European	http://ftp.ebi.ac.uk/pub/databases/gwas/summary_statistics/GCST90200001-GCST90201000/GCST90200068	36635386
GCST90201486	1,2-dilinoleoyl-GPE (18:2/18:2) levels	metabolite measurement	54 African unspecified	http://ftp.ebi.ac.uk/pub/databases/gwas/summary_statistics/GCST90201001-GCST90202000/GCST90201486	36635386
GCST90203524	1,2-dilinoleoyl-GPE (18:2/18:2) levels	metabolite measurement	96 South Asian	http://ftp.ebi.ac.uk/pub/databases/gwas/summary_statistics/GCST90203001-GCST90204000/GCST90203524	36635386
GCST90202515	1,2-dilinoleoyl-GPE (18:2/18:2) levels	metabolite measurement	92 East Asian	http://ftp.ebi.ac.uk/pub/databases/gwas/summary_statistics/GCST90202001-GCST90203000/GCST90202515	36635386
GCST90201054	1,2-dipalmitoyl-gpc (16:0/16:0) levels	1,2-dipalmitoyl-GPC (16:0/16:0) measurement	59 African unspecified	http://ftp.ebi.ac.uk/pub/databases/gwas/summary_statistics/GCST90201001-GCST90202000/GCST90201054	36635386
GCST90199660	1,2-dipalmitoyl-gpc (16:0/16:0) levels	1,2-dipalmitoyl-GPC (16:0/16:0) measurement	8264 European	http://ftp.ebi.ac.uk/pub/databases/gwas/summary_statistics/GCST90199001-GCST90200000/GCST90199660	36635386
GCST90203119	1,2-dipalmitoyl-gpc (16:0/16:0) levels	1,2-dipalmitoyl-GPC (16:0/16:0) measurement	108 South Asian	http://ftp.ebi.ac.uk/pub/databases/gwas/summary_statistics/GCST90203001-GCST90204000/GCST90203119	36635386
GCST90202085	1,2-dipalmitoyl-gpc (16:0/16:0) levels	1,2-dipalmitoyl-GPC (16:0/16:0) measurement	104 East Asian	http://ftp.ebi.ac.uk/pub/databases/gwas/summary_statistics/GCST90202001-GCST90203000/GCST90202085	36635386
GCST90202191	1,3,7-trimethylurate levels	1,3,7-trimethylurate measurement	87 East Asian	http://ftp.ebi.ac.uk/pub/databases/gwas/summary_statistics/GCST90202001-GCST90203000/GCST90202191	36635386
GCST90203217	1,3,7-trimethylurate levels	1,3,7-trimethylurate measurement	98 South Asian	http://ftp.ebi.ac.uk/pub/databases/gwas/summary_statistics/GCST90203001-GCST90204000/GCST90203217	36635386
GCST90199757	1,3,7-trimethylurate levels	1,3,7-trimethylurate measurement	7446 European	http://ftp.ebi.ac.uk/pub/databases/gwas/summary_statistics/GCST90199001-GCST90200000/GCST90199757	36635386
GCST90201157	1,3,7-trimethylurate levels	1,3,7-trimethylurate measurement	45 African unspecified	http://ftp.ebi.ac.uk/pub/databases/gwas/summary_statistics/GCST90201001-GCST90202000/GCST90201157	36635386
GCST90202126	1,3-dimethylurate levels	1,3-dimethylurate measurement	83 East Asian	http://ftp.ebi.ac.uk/pub/databases/gwas/summary_statistics/GCST90202001-GCST90203000/GCST90202126	36635386
GCST90201099	1,3-dimethylurate levels	1,3-dimethylurate measurement	40 African unspecified	http://ftp.ebi.ac.uk/pub/databases/gwas/summary_statistics/GCST90201001-GCST90202000/GCST90201099	36635386
GCST90199694	1,3-dimethylurate levels	1,3-dimethylurate measurement	7444 European	http://ftp.ebi.ac.uk/pub/databases/gwas/summary_statistics/GCST90199001-GCST90200000/GCST90199694	36635386
GCST90203169	1,3-dimethylurate levels	1,3-dimethylurate measurement	96 South Asian	http://ftp.ebi.ac.uk/pub/databases/gwas/summary_statistics/GCST90203001-GCST90204000/GCST90203169	36635386
GCST90201059	1,5-anhydroglucitol (1,5-ag) levels	1,5 anhydroglucitol measurement	58 African unspecified	http://ftp.ebi.ac.uk/pub/databases/gwas/summary_statistics/GCST90201001-GCST90202000/GCST90201059	36635386
GCST90199648	1,5-anhydroglucitol (1,5-ag) levels	1,5 anhydroglucitol measurement	8139 European	http://ftp.ebi.ac.uk/pub/databases/gwas/summary_statistics/GCST90199001-GCST90200000/GCST90199648	36635386
GCST90203120	1,5-anhydroglucitol (1,5-ag) levels	1,5 anhydroglucitol measurement	105 South Asian	http://ftp.ebi.ac.uk/pub/databases/gwas/summary_statistics/GCST90203001-GCST90204000/GCST90203120	36635386
GCST90203219	1,7-dimethyluric acid levels	1,7-dimethylurate measurement	102 South Asian	http://ftp.ebi.ac.uk/pub/databases/gwas/summary_statistics/GCST90203001-GCST90204000/GCST90203219	36635386
GCST90202206	1,7-dimethyluric acid levels	1,7-dimethylurate measurement	97 East Asian	http://ftp.ebi.ac.uk/pub/databases/gwas/summary_statistics/GCST90202001-GCST90203000/GCST90202206	36635386
GCST90199756	1,7-dimethyluric acid levels	1,7-dimethylurate measurement	7950 European	http://ftp.ebi.ac.uk/pub/databases/gwas/summary_statistics/GCST90199001-GCST90200000/GCST90199756	36635386
GCST90201168	1,7-dimethyluric acid levels	1,7-dimethylurate measurement	54 African unspecified	http://ftp.ebi.ac.uk/pub/databases/gwas/summary_statistics/GCST90201001-GCST90202000/GCST90201168	36635386
GCST90202172	10-heptadecenoate (17:1n7) levels	10-heptadecenoate 17:1n7 measurement	104 East Asian	http://ftp.ebi.ac.uk/pub/databases/gwas/summary_statistics/GCST90202001-GCST90203000/GCST90202172	36635386
GCST90199731	10-heptadecenoate (17:1n7) levels	10-heptadecenoate 17:1n7 measurement	8282 European	http://ftp.ebi.ac.uk/pub/databases/gwas/summary_statistics/GCST90199001-GCST90200000/GCST90199731	36635386
GCST90201125	10-heptadecenoate (17:1n7) levels	10-heptadecenoate 17:1n7 measurement	60 African unspecified	http://ftp.ebi.ac.uk/pub/databases/gwas/summary_statistics/GCST90201001-GCST90202000/GCST90201125	36635386
GCST90202173	10-nonadecenoate (19:1n9) levels	10-nonadecenoate 19:1n9 measurement	104 East Asian	http://ftp.ebi.ac.uk/pub/databases/gwas/summary_statistics/GCST90202001-GCST90203000/GCST90202173	36635386
GCST90199728	10-nonadecenoate (19:1n9) levels	10-nonadecenoate 19:1n9 measurement	8277 European	http://ftp.ebi.ac.uk/pub/databases/gwas/summary_statistics/GCST90199001-GCST90200000/GCST90199728	36635386
GCST90203199	10-nonadecenoate (19:1n9) levels	10-nonadecenoate 19:1n9 measurement	108 South Asian	http://ftp.ebi.ac.uk/pub/databases/gwas/summary_statistics/GCST90203001-GCST90204000/GCST90203199	36635386
GCST90201126	10-nonadecenoate (19:1n9) levels	10-nonadecenoate 19:1n9 measurement	60 African unspecified	http://ftp.ebi.ac.uk/pub/databases/gwas/summary_statistics/GCST90201001-GCST90202000/GCST90201126	36635386
GCST90201116	10-undecenoate (11:1n1) levels	10-undecenoate 11:1n1 measurement	60 African unspecified	http://ftp.ebi.ac.uk/pub/databases/gwas/summary_statistics/GCST90201001-GCST90202000/GCST90201116	36635386
GCST90202156	10-undecenoate (11:1n1) levels	10-undecenoate 11:1n1 measurement	104 East Asian	http://ftp.ebi.ac.uk/pub/databases/gwas/summary_statistics/GCST90202001-GCST90203000/GCST90202156	36635386
GCST90199716	10-undecenoate (11:1n1) levels	10-undecenoate 11:1n1 measurement	8243 European	http://ftp.ebi.ac.uk/pub/databases/gwas/summary_statistics/GCST90199001-GCST90200000/GCST90199716	36635386
GCST90203180	10-undecenoate (11:1n1) levels	10-undecenoate 11:1n1 measurement	108 South Asian	http://ftp.ebi.ac.uk/pub/databases/gwas/summary_statistics/GCST90203001-GCST90204000/GCST90203180	36635386
GCST90201609	11beta-hydroxyandrosterone glucuronide levels	11beta-hydroxyandrosterone glucuronide measurement	60 African unspecified	http://ftp.ebi.ac.uk/pub/databases/gwas/summary_statistics/GCST90201001-GCST90202000/GCST90201609	36635386
GCST90202657	11beta-hydroxyandrosterone glucuronide levels	11beta-hydroxyandrosterone glucuronide measurement	103 East Asian	http://ftp.ebi.ac.uk/pub/databases/gwas/summary_statistics/GCST90202001-GCST90203000/GCST90202657	36635386
GCST90200214	11beta-hydroxyandrosterone glucuronide levels	11beta-hydroxyandrosterone glucuronide measurement	8081 European	http://ftp.ebi.ac.uk/pub/databases/gwas/summary_statistics/GCST90200001-GCST90201000/GCST90200214	36635386
GCST90203649	11beta-hydroxyandrosterone glucuronide levels	11beta-hydroxyandrosterone glucuronide measurement	103 South Asian	http://ftp.ebi.ac.uk/pub/databases/gwas/summary_statistics/GCST90203001-GCST90204000/GCST90203649	36635386
GCST90201613	11beta-hydroxyetiocholanolone glucuronide levels	metabolite measurement	46 African unspecified	http://ftp.ebi.ac.uk/pub/databases/gwas/summary_statistics/GCST90201001-GCST90202000/GCST90201613	36635386
GCST90202649	11beta-hydroxyetiocholanolone glucuronide levels	metabolite measurement	69 East Asian	http://ftp.ebi.ac.uk/pub/databases/gwas/summary_statistics/GCST90202001-GCST90203000/GCST90202649	36635386
GCST90200218	11beta-hydroxyetiocholanolone glucuronide levels	metabolite measurement	7220 European	http://ftp.ebi.ac.uk/pub/databases/gwas/summary_statistics/GCST90200001-GCST90201000/GCST90200218	36635386
GCST90203654	11beta-hydroxyetiocholanolone glucuronide levels	metabolite measurement	70 South Asian	http://ftp.ebi.ac.uk/pub/databases/gwas/summary_statistics/GCST90203001-GCST90204000/GCST90203654	36635386
GCST90200434	12,13-DiHOME levels	level of 9,10-dihydroxyoctadec-12-enoic acid in blood plasma	7918 European	http://ftp.ebi.ac.uk/pub/databases/gwas/summary_statistics/GCST90200001-GCST90201000/GCST90200434	36635386
GCST90201831	12,13-DiHOME levels	level of 9,10-dihydroxyoctadec-12-enoic acid in blood plasma	57 African unspecified	http://ftp.ebi.ac.uk/pub/databases/gwas/summary_statistics/GCST90201001-GCST90202000/GCST90201831	36635386
GCST90203862	12,13-DiHOME levels	level of 9,10-dihydroxyoctadec-12-enoic acid in blood plasma	104 South Asian	http://ftp.ebi.ac.uk/pub/databases/gwas/summary_statistics/GCST90203001-GCST90204000/GCST90203862	36635386
GCST90202852	12,13-DiHOME levels	level of 9,10-dihydroxyoctadec-12-enoic acid in blood plasma	103 East Asian	http://ftp.ebi.ac.uk/pub/databases/gwas/summary_statistics/GCST90202001-GCST90203000/GCST90202852	36635386
GCST90201286	13-HODE + 9-HODE levels	13-HODE + 9-HODE measurement	60 African unspecified	http://ftp.ebi.ac.uk/pub/databases/gwas/summary_statistics/GCST90201001-GCST90202000/GCST90201286	36635386
GCST90202310	13-HODE + 9-HODE levels	13-HODE + 9-HODE measurement	103 East Asian	http://ftp.ebi.ac.uk/pub/databases/gwas/summary_statistics/GCST90202001-GCST90203000/GCST90202310	36635386
GCST90199875	13-HODE + 9-HODE levels	13-HODE + 9-HODE measurement	8207 European	http://ftp.ebi.ac.uk/pub/databases/gwas/summary_statistics/GCST90199001-GCST90200000/GCST90199875	36635386
GCST90203329	13-HODE + 9-HODE levels	13-HODE + 9-HODE measurement	107 South Asian	http://ftp.ebi.ac.uk/pub/databases/gwas/summary_statistics/GCST90203001-GCST90204000/GCST90203329	36635386
GCST90202312	16a-hydroxy DHEA 3-sulfate levels	16a-hydroxy DHEA 3-sulfate measurement	103 East Asian	http://ftp.ebi.ac.uk/pub/databases/gwas/summary_statistics/GCST90202001-GCST90203000/GCST90202312	36635386
GCST90203320	16a-hydroxy DHEA 3-sulfate levels	16a-hydroxy DHEA 3-sulfate measurement	107 South Asian	http://ftp.ebi.ac.uk/pub/databases/gwas/summary_statistics/GCST90203001-GCST90204000/GCST90203320	36635386
GCST90199863	16a-hydroxy DHEA 3-sulfate levels	16a-hydroxy DHEA 3-sulfate measurement	8236 European	http://ftp.ebi.ac.uk/pub/databases/gwas/summary_statistics/GCST90199001-GCST90200000/GCST90199863	36635386
GCST90201271	16a-hydroxy DHEA 3-sulfate levels	16a-hydroxy DHEA 3-sulfate measurement	60 African unspecified	http://ftp.ebi.ac.uk/pub/databases/gwas/summary_statistics/GCST90201001-GCST90202000/GCST90201271	36635386
GCST90199963	17alpha-hydroxypregnanolone glucuronide levels	17alpha-hydroxypregnanolone glucuronide measurement	5582 European	http://ftp.ebi.ac.uk/pub/databases/gwas/summary_statistics/GCST90199001-GCST90200000/GCST90199963	36635386
GCST90203414	17alpha-hydroxypregnanolone glucuronide levels	17alpha-hydroxypregnanolone glucuronide measurement	65 South Asian	http://ftp.ebi.ac.uk/pub/databases/gwas/summary_statistics/GCST90203001-GCST90204000/GCST90203414	36635386
GCST90201376	17alpha-hydroxypregnanolone glucuronide levels	17alpha-hydroxypregnanolone glucuronide measurement	43 African unspecified	http://ftp.ebi.ac.uk/pub/databases/gwas/summary_statistics/GCST90201001-GCST90202000/GCST90201376	36635386
GCST90202411	17alpha-hydroxypregnanolone glucuronide levels	17alpha-hydroxypregnanolone glucuronide measurement	73 East Asian	http://ftp.ebi.ac.uk/pub/databases/gwas/summary_statistics/GCST90202001-GCST90203000/GCST90202411	36635386
GCST90203236	1-arachidonoyl-gpc (20:4n6) levels	1-arachidonoyl-GPC (20:4n6) measurement	108 South Asian	http://ftp.ebi.ac.uk/pub/databases/gwas/summary_statistics/GCST90203001-GCST90204000/GCST90203236	36635386
GCST90202238	1-arachidonoyl-gpc (20:4n6) levels	1-arachidonoyl-GPC (20:4n6) measurement	103 East Asian	http://ftp.ebi.ac.uk/pub/databases/gwas/summary_statistics/GCST90202001-GCST90203000/GCST90202238	36635386
GCST90199788	1-arachidonoyl-gpc (20:4n6) levels	1-arachidonoyl-GPC (20:4n6) measurement	8267 European	http://ftp.ebi.ac.uk/pub/databases/gwas/summary_statistics/GCST90199001-GCST90200000/GCST90199788	36635386
GCST90203266	1-arachidonoyl-GPE (20:4n6) levels	1-arachidonoyl-GPE (20:4n6) measurement	107 South Asian	http://ftp.ebi.ac.uk/pub/databases/gwas/summary_statistics/GCST90203001-GCST90204000/GCST90203266	36635386
GCST90202237	1-arachidonoyl-GPE (20:4n6) levels	1-arachidonoyl-GPE (20:4n6) measurement	104 East Asian	http://ftp.ebi.ac.uk/pub/databases/gwas/summary_statistics/GCST90202001-GCST90203000/GCST90202237	36635386
GCST90199791	1-arachidonoyl-GPE (20:4n6) levels	1-arachidonoyl-GPE (20:4n6) measurement	8270 European	http://ftp.ebi.ac.uk/pub/databases/gwas/summary_statistics/GCST90199001-GCST90200000/GCST90199791	36635386
GCST90201199	1-arachidonoyl-GPE (20:4n6) levels	1-arachidonoyl-GPE (20:4n6) measurement	59 African unspecified	http://ftp.ebi.ac.uk/pub/databases/gwas/summary_statistics/GCST90201001-GCST90202000/GCST90201199	36635386
GCST90203244	1-arachidonylglycerol (20:4) levels	1-arachidonylglycerol (20:4) measurement	99 South Asian	http://ftp.ebi.ac.uk/pub/databases/gwas/summary_statistics/GCST90203001-GCST90204000/GCST90203244	36635386
GCST90202224	1-arachidonylglycerol (20:4) levels	1-arachidonylglycerol (20:4) measurement	98 East Asian	http://ftp.ebi.ac.uk/pub/databases/gwas/summary_statistics/GCST90202001-GCST90203000/GCST90202224	36635386
GCST90199770	1-arachidonylglycerol (20:4) levels	1-arachidonylglycerol (20:4) measurement	7650 European	http://ftp.ebi.ac.uk/pub/databases/gwas/summary_statistics/GCST90199001-GCST90200000/GCST90199770	36635386
GCST90201178	1-arachidonylglycerol (20:4) levels	1-arachidonylglycerol (20:4) measurement	55 African unspecified	http://ftp.ebi.ac.uk/pub/databases/gwas/summary_statistics/GCST90201001-GCST90202000/GCST90201178	36635386
GCST90199976	1-dihomo-linolenylglycerol (20:3) levels	1-dihomo-linolenylglycerol (20:3) measurement	6470 European	http://ftp.ebi.ac.uk/pub/databases/gwas/summary_statistics/GCST90199001-GCST90200000/GCST90199976	36635386
GCST90203438	1-dihomo-linolenylglycerol (20:3) levels	1-dihomo-linolenylglycerol (20:3) measurement	76 South Asian	http://ftp.ebi.ac.uk/pub/databases/gwas/summary_statistics/GCST90203001-GCST90204000/GCST90203438	36635386
GCST90201392	1-dihomo-linolenylglycerol (20:3) levels	1-dihomo-linolenylglycerol (20:3) measurement	44 African unspecified	http://ftp.ebi.ac.uk/pub/databases/gwas/summary_statistics/GCST90201001-GCST90202000/GCST90201392	36635386
GCST90202444	1-dihomo-linolenylglycerol (20:3) levels	1-dihomo-linolenylglycerol (20:3) measurement	81 East Asian	http://ftp.ebi.ac.uk/pub/databases/gwas/summary_statistics/GCST90202001-GCST90203000/GCST90202444	36635386
GCST90199956	1H-indole-7-acetic acid levels	blood 1H-indole-7-acetic acid measurement	5986 European	http://ftp.ebi.ac.uk/pub/databases/gwas/summary_statistics/GCST90199001-GCST90200000/GCST90199956	36635386
GCST90202392	1H-indole-7-acetic acid levels	blood 1H-indole-7-acetic acid measurement	57 East Asian	http://ftp.ebi.ac.uk/pub/databases/gwas/summary_statistics/GCST90202001-GCST90203000/GCST90202392	36635386
GCST90201363	1H-indole-7-acetic acid levels	blood 1H-indole-7-acetic acid measurement	40 African unspecified	http://ftp.ebi.ac.uk/pub/databases/gwas/summary_statistics/GCST90201001-GCST90202000/GCST90201363	36635386
GCST90201301	1-lignoceroyl-GPC (24:0) levels	1-lignoceroyl-GPC (24:0) measurement	60 African unspecified	http://ftp.ebi.ac.uk/pub/databases/gwas/summary_statistics/GCST90201001-GCST90202000/GCST90201301	36635386
GCST90202352	1-lignoceroyl-GPC (24:0) levels	1-lignoceroyl-GPC (24:0) measurement	102 East Asian	http://ftp.ebi.ac.uk/pub/databases/gwas/summary_statistics/GCST90202001-GCST90203000/GCST90202352	36635386
GCST90199895	1-lignoceroyl-GPC (24:0) levels	1-lignoceroyl-GPC (24:0) measurement	8208 European	http://ftp.ebi.ac.uk/pub/databases/gwas/summary_statistics/GCST90199001-GCST90200000/GCST90199895	36635386
GCST90203366	1-lignoceroyl-GPC (24:0) levels	1-lignoceroyl-GPC (24:0) measurement	106 South Asian	http://ftp.ebi.ac.uk/pub/databases/gwas/summary_statistics/GCST90203001-GCST90204000/GCST90203366	36635386
GCST90199958	1-linolenoyl-GPC (18:3) levels	1-linolenoyl-GPC (18:3) measurement	8261 European	http://ftp.ebi.ac.uk/pub/databases/gwas/summary_statistics/GCST90199001-GCST90200000/GCST90199958	36635386
GCST90203401	1-linolenoyl-GPC (18:3) levels	1-linolenoyl-GPC (18:3) measurement	108 South Asian	http://ftp.ebi.ac.uk/pub/databases/gwas/summary_statistics/GCST90203001-GCST90204000/GCST90203401	36635386
GCST90202405	1-linolenoyl-GPC (18:3) levels	1-linolenoyl-GPC (18:3) measurement	103 East Asian	http://ftp.ebi.ac.uk/pub/databases/gwas/summary_statistics/GCST90202001-GCST90203000/GCST90202405	36635386
GCST90201364	1-linolenoyl-GPC (18:3) levels	1-linolenoyl-GPC (18:3) measurement	60 African unspecified	http://ftp.ebi.ac.uk/pub/databases/gwas/summary_statistics/GCST90201001-GCST90202000/GCST90201364	36635386
GCST90200073	1-linoleoyl-2-arachidonoyl-GPC (18:2/20:4n6) levels	1-linoleoyl-2-arachidonoyl-GPC (18:2/20:4n6) measurement	8063 European	http://ftp.ebi.ac.uk/pub/databases/gwas/summary_statistics/GCST90200001-GCST90201000/GCST90200073	36635386
GCST90201482	1-linoleoyl-2-arachidonoyl-GPC (18:2/20:4n6) levels	1-linoleoyl-2-arachidonoyl-GPC (18:2/20:4n6) measurement	58 African unspecified	http://ftp.ebi.ac.uk/pub/databases/gwas/summary_statistics/GCST90201001-GCST90202000/GCST90201482	36635386
GCST90203526	1-linoleoyl-2-arachidonoyl-GPC (18:2/20:4n6) levels	1-linoleoyl-2-arachidonoyl-GPC (18:2/20:4n6) measurement	103 South Asian	http://ftp.ebi.ac.uk/pub/databases/gwas/summary_statistics/GCST90203001-GCST90204000/GCST90203526	36635386
GCST90202513	1-linoleoyl-2-arachidonoyl-GPC (18:2/20:4n6) levels	1-linoleoyl-2-arachidonoyl-GPC (18:2/20:4n6) measurement	97 East Asian	http://ftp.ebi.ac.uk/pub/databases/gwas/summary_statistics/GCST90202001-GCST90203000/GCST90202513	36635386
GCST90201495	1-linoleoyl-2-linolenoyl-GPC (18:2/18:3) levels	1-linoleoyl-2-linolenoyl-GPC (18:2/18:3) measurement	60 African unspecified	http://ftp.ebi.ac.uk/pub/databases/gwas/summary_statistics/GCST90201001-GCST90202000/GCST90201495	36635386
GCST90203551	1-linoleoyl-2-linolenoyl-GPC (18:2/18:3) levels	1-linoleoyl-2-linolenoyl-GPC (18:2/18:3) measurement	107 South Asian	http://ftp.ebi.ac.uk/pub/databases/gwas/summary_statistics/GCST90203001-GCST90204000/GCST90203551	36635386
GCST90202543	1-linoleoyl-2-linolenoyl-GPC (18:2/18:3) levels	1-linoleoyl-2-linolenoyl-GPC (18:2/18:3) measurement	103 East Asian	http://ftp.ebi.ac.uk/pub/databases/gwas/summary_statistics/GCST90202001-GCST90203000/GCST90202543	36635386
GCST90200095	1-linoleoyl-2-linolenoyl-GPC (18:2/18:3) levels	1-linoleoyl-2-linolenoyl-GPC (18:2/18:3) measurement	8188 European	http://ftp.ebi.ac.uk/pub/databases/gwas/summary_statistics/GCST90200001-GCST90201000/GCST90200095	36635386
GCST90201090	1-linoleoylglycerol (18:2) levels	1-linoleoylglycerol (18:2) measurement	59 African unspecified	http://ftp.ebi.ac.uk/pub/databases/gwas/summary_statistics/GCST90201001-GCST90202000/GCST90201090	36635386
GCST90199684	1-linoleoylglycerol (18:2) levels	1-linoleoylglycerol (18:2) measurement	8212 European	http://ftp.ebi.ac.uk/pub/databases/gwas/summary_statistics/GCST90199001-GCST90200000/GCST90199684	36635386
GCST90203166	1-linoleoylglycerol (18:2) levels	1-linoleoylglycerol (18:2) measurement	107 South Asian	http://ftp.ebi.ac.uk/pub/databases/gwas/summary_statistics/GCST90203001-GCST90204000/GCST90203166	36635386
GCST90202125	1-linoleoylglycerol (18:2) levels	1-linoleoylglycerol (18:2) measurement	103 East Asian	http://ftp.ebi.ac.uk/pub/databases/gwas/summary_statistics/GCST90202001-GCST90203000/GCST90202125	36635386
GCST90202195	1-linoleoyl-gpc (18:2) levels	1-linoleoyl-GPC (18:2) measurement	103 East Asian	http://ftp.ebi.ac.uk/pub/databases/gwas/summary_statistics/GCST90202001-GCST90203000/GCST90202195	36635386
GCST90203223	1-linoleoyl-gpc (18:2) levels	1-linoleoyl-GPC (18:2) measurement	107 South Asian	http://ftp.ebi.ac.uk/pub/databases/gwas/summary_statistics/GCST90203001-GCST90204000/GCST90203223	36635386
GCST90199742	1-linoleoyl-gpc (18:2) levels	1-linoleoyl-GPC (18:2) measurement	8262 European	http://ftp.ebi.ac.uk/pub/databases/gwas/summary_statistics/GCST90199001-GCST90200000/GCST90199742	36635386
GCST90201156	1-linoleoyl-gpc (18:2) levels	1-linoleoyl-GPC (18:2) measurement	60 African unspecified	http://ftp.ebi.ac.uk/pub/databases/gwas/summary_statistics/GCST90201001-GCST90202000/GCST90201156	36635386
GCST90203259	1-linoleoyl-GPE (18:2) levels	1-linoleoyl-GPE (18:2) measurement	108 South Asian	http://ftp.ebi.ac.uk/pub/databases/gwas/summary_statistics/GCST90203001-GCST90204000/GCST90203259	36635386
GCST90202242	1-linoleoyl-GPE (18:2) levels	1-linoleoyl-GPE (18:2) measurement	103 East Asian	http://ftp.ebi.ac.uk/pub/databases/gwas/summary_statistics/GCST90202001-GCST90203000/GCST90202242	36635386
GCST90199793	1-linoleoyl-GPE (18:2) levels	1-linoleoyl-GPE (18:2) measurement	8279 European	http://ftp.ebi.ac.uk/pub/databases/gwas/summary_statistics/GCST90199001-GCST90200000/GCST90199793	36635386
GCST90201198	1-linoleoyl-GPE (18:2) levels	1-linoleoyl-GPE (18:2) measurement	60 African unspecified	http://ftp.ebi.ac.uk/pub/databases/gwas/summary_statistics/GCST90201001-GCST90202000/GCST90201198	36635386
GCST90200074	1-linoleoyl-GPG (18:2) levels	1-linoleoyl-GPG (18:2) measurement	8115 European	http://ftp.ebi.ac.uk/pub/databases/gwas/summary_statistics/GCST90200001-GCST90201000/GCST90200074	36635386
GCST90201500	1-linoleoyl-GPG (18:2) levels	1-linoleoyl-GPG (18:2) measurement	59 African unspecified	http://ftp.ebi.ac.uk/pub/databases/gwas/summary_statistics/GCST90201001-GCST90202000/GCST90201500	36635386
GCST90203512	1-linoleoyl-GPG (18:2) levels	1-linoleoyl-GPG (18:2) measurement	107 South Asian	http://ftp.ebi.ac.uk/pub/databases/gwas/summary_statistics/GCST90203001-GCST90204000/GCST90203512	36635386
GCST90202524	1-linoleoyl-GPG (18:2) levels	1-linoleoyl-GPG (18:2) measurement	104 East Asian	http://ftp.ebi.ac.uk/pub/databases/gwas/summary_statistics/GCST90202001-GCST90203000/GCST90202524	36635386
GCST90203278	1-linoleoyl-GPI (18:2) levels	1-linoleoyl-GPI (18:2) measurement	107 South Asian	http://ftp.ebi.ac.uk/pub/databases/gwas/summary_statistics/GCST90203001-GCST90204000/GCST90203278	36635386
GCST90202274	1-linoleoyl-GPI (18:2) levels	1-linoleoyl-GPI (18:2) measurement	104 East Asian	http://ftp.ebi.ac.uk/pub/databases/gwas/summary_statistics/GCST90202001-GCST90203000/GCST90202274	36635386
GCST90199821	1-linoleoyl-GPI (18:2) levels	1-linoleoyl-GPI (18:2) measurement	8268 European	http://ftp.ebi.ac.uk/pub/databases/gwas/summary_statistics/GCST90199001-GCST90200000/GCST90199821	36635386
GCST90201231	1-linoleoyl-GPI (18:2) levels	1-linoleoyl-GPI (18:2) measurement	60 African unspecified	http://ftp.ebi.ac.uk/pub/databases/gwas/summary_statistics/GCST90201001-GCST90202000/GCST90201231	36635386
GCST90202150	1-methyl-4-imidazoleacetate levels	1-methyl-4-imidazoleacetate measurement	98 East Asian	http://ftp.ebi.ac.uk/pub/databases/gwas/summary_statistics/GCST90202001-GCST90203000/GCST90202150	36635386
GCST90199717	1-methyl-4-imidazoleacetate levels	1-methyl-4-imidazoleacetate measurement	8090 European	http://ftp.ebi.ac.uk/pub/databases/gwas/summary_statistics/GCST90199001-GCST90200000/GCST90199717	36635386
GCST90203190	1-methyl-4-imidazoleacetate levels	1-methyl-4-imidazoleacetate measurement	108 South Asian	http://ftp.ebi.ac.uk/pub/databases/gwas/summary_statistics/GCST90203001-GCST90204000/GCST90203190	36635386
GCST90201118	1-methyl-4-imidazoleacetate levels	1-methyl-4-imidazoleacetate measurement	58 African unspecified	http://ftp.ebi.ac.uk/pub/databases/gwas/summary_statistics/GCST90201001-GCST90202000/GCST90201118	36635386
GCST90201302	1-methyl-5-imidazoleacetate levels	1-methyl-5-imidazoleacetate measurement	58 African unspecified	http://ftp.ebi.ac.uk/pub/databases/gwas/summary_statistics/GCST90201001-GCST90202000/GCST90201302	36635386
GCST90202350	1-methyl-5-imidazoleacetate levels	1-methyl-5-imidazoleacetate measurement	100 East Asian	http://ftp.ebi.ac.uk/pub/databases/gwas/summary_statistics/GCST90202001-GCST90203000/GCST90202350	36635386
GCST90199901	1-methyl-5-imidazoleacetate levels	1-methyl-5-imidazoleacetate measurement	8171 European	http://ftp.ebi.ac.uk/pub/databases/gwas/summary_statistics/GCST90199001-GCST90200000/GCST90199901	36635386
GCST90203354	1-methyl-5-imidazoleacetate levels	1-methyl-5-imidazoleacetate measurement	105 South Asian	http://ftp.ebi.ac.uk/pub/databases/gwas/summary_statistics/GCST90203001-GCST90204000/GCST90203354	36635386
GCST90201089	1-methylhistidine levels	1-Methylhistidine measurement	60 African unspecified	http://ftp.ebi.ac.uk/pub/databases/gwas/summary_statistics/GCST90201001-GCST90202000/GCST90201089	36635386
GCST90199691	1-methylhistidine levels	1-Methylhistidine measurement	8226 European	http://ftp.ebi.ac.uk/pub/databases/gwas/summary_statistics/GCST90199001-GCST90200000/GCST90199691	36635386
GCST90203158	1-methylhistidine levels	1-Methylhistidine measurement	107 South Asian	http://ftp.ebi.ac.uk/pub/databases/gwas/summary_statistics/GCST90203001-GCST90204000/GCST90203158	36635386
GCST90202121	1-methylhistidine levels	1-Methylhistidine measurement	104 East Asian	http://ftp.ebi.ac.uk/pub/databases/gwas/summary_statistics/GCST90202001-GCST90203000/GCST90202121	36635386
GCST90201814	1-methylnicotinamide levels	1-methylnicotinamide measurement	59 African unspecified	http://ftp.ebi.ac.uk/pub/databases/gwas/summary_statistics/GCST90201001-GCST90202000/GCST90201814	36635386
GCST90203839	1-methylnicotinamide levels	1-methylnicotinamide measurement	106 South Asian	http://ftp.ebi.ac.uk/pub/databases/gwas/summary_statistics/GCST90203001-GCST90204000/GCST90203839	36635386
GCST90200406	1-methylnicotinamide levels	1-methylnicotinamide measurement	8194 European	http://ftp.ebi.ac.uk/pub/databases/gwas/summary_statistics/GCST90200001-GCST90201000/GCST90200406	36635386
GCST90202859	1-methylnicotinamide levels	1-methylnicotinamide measurement	104 East Asian	http://ftp.ebi.ac.uk/pub/databases/gwas/summary_statistics/GCST90202001-GCST90203000/GCST90202859	36635386
GCST90202199	1-methylxanthine levels	1-methylxanthine measurement	98 East Asian	http://ftp.ebi.ac.uk/pub/databases/gwas/summary_statistics/GCST90202001-GCST90203000/GCST90202199	36635386
GCST90203221	1-methylxanthine levels	1-methylxanthine measurement	104 South Asian	http://ftp.ebi.ac.uk/pub/databases/gwas/summary_statistics/GCST90203001-GCST90204000/GCST90203221	36635386
GCST90199763	1-methylxanthine levels	1-methylxanthine measurement	7959 European	http://ftp.ebi.ac.uk/pub/databases/gwas/summary_statistics/GCST90199001-GCST90200000/GCST90199763	36635386
GCST90201164	1-methylxanthine levels	1-methylxanthine measurement	53 African unspecified	http://ftp.ebi.ac.uk/pub/databases/gwas/summary_statistics/GCST90201001-GCST90202000/GCST90201164	36635386
GCST90200078	1-myristoyl-2-arachidonoyl-GPC (14:0/20:4) levels	1-myristoyl-2-arachidonoyl-GPC (14:0/20:4) measurement	8264 European	http://ftp.ebi.ac.uk/pub/databases/gwas/summary_statistics/GCST90200001-GCST90201000/GCST90200078	36635386
GCST90201484	1-myristoyl-2-arachidonoyl-GPC (14:0/20:4) levels	1-myristoyl-2-arachidonoyl-GPC (14:0/20:4) measurement	60 African unspecified	http://ftp.ebi.ac.uk/pub/databases/gwas/summary_statistics/GCST90201001-GCST90202000/GCST90201484	36635386
GCST90203519	1-myristoyl-2-arachidonoyl-GPC (14:0/20:4) levels	1-myristoyl-2-arachidonoyl-GPC (14:0/20:4) measurement	108 South Asian	http://ftp.ebi.ac.uk/pub/databases/gwas/summary_statistics/GCST90203001-GCST90204000/GCST90203519	36635386
GCST90202512	1-myristoyl-2-arachidonoyl-GPC (14:0/20:4) levels	1-myristoyl-2-arachidonoyl-GPC (14:0/20:4) measurement	104 East Asian	http://ftp.ebi.ac.uk/pub/databases/gwas/summary_statistics/GCST90202001-GCST90203000/GCST90202512	36635386
GCST90201057	1-myristoyl-2-palmitoyl-gpc (14:0/16:0) levels	1-myristoyl-2-palmitoyl-GPC (14:0/16:0) measurement	60 African unspecified	http://ftp.ebi.ac.uk/pub/databases/gwas/summary_statistics/GCST90201001-GCST90202000/GCST90201057	36635386
GCST90199653	1-myristoyl-2-palmitoyl-gpc (14:0/16:0) levels	1-myristoyl-2-palmitoyl-GPC (14:0/16:0) measurement	8271 European	http://ftp.ebi.ac.uk/pub/databases/gwas/summary_statistics/GCST90199001-GCST90200000/GCST90199653	36635386
GCST90203127	1-myristoyl-2-palmitoyl-gpc (14:0/16:0) levels	1-myristoyl-2-palmitoyl-GPC (14:0/16:0) measurement	108 South Asian	http://ftp.ebi.ac.uk/pub/databases/gwas/summary_statistics/GCST90203001-GCST90204000/GCST90203127	36635386
GCST90202082	1-myristoyl-2-palmitoyl-gpc (14:0/16:0) levels	1-myristoyl-2-palmitoyl-GPC (14:0/16:0) measurement	103 East Asian	http://ftp.ebi.ac.uk/pub/databases/gwas/summary_statistics/GCST90202001-GCST90203000/GCST90202082	36635386
GCST90200079	1-oleoyl-2-arachidonoyl-GPE (18:1/20:4) levels	1-oleoyl-2-arachidonoyl-GPE (18:1/20:4) measurement	8121 European	http://ftp.ebi.ac.uk/pub/databases/gwas/summary_statistics/GCST90200001-GCST90201000/GCST90200079	36635386
GCST90201499	1-oleoyl-2-arachidonoyl-GPE (18:1/20:4) levels	1-oleoyl-2-arachidonoyl-GPE (18:1/20:4) measurement	59 African unspecified	http://ftp.ebi.ac.uk/pub/databases/gwas/summary_statistics/GCST90201001-GCST90202000/GCST90201499	36635386
GCST90203527	1-oleoyl-2-arachidonoyl-GPE (18:1/20:4) levels	1-oleoyl-2-arachidonoyl-GPE (18:1/20:4) measurement	107 South Asian	http://ftp.ebi.ac.uk/pub/databases/gwas/summary_statistics/GCST90203001-GCST90204000/GCST90203527	36635386
GCST90202516	1-oleoyl-2-arachidonoyl-GPE (18:1/20:4) levels	1-oleoyl-2-arachidonoyl-GPE (18:1/20:4) measurement	101 East Asian	http://ftp.ebi.ac.uk/pub/databases/gwas/summary_statistics/GCST90202001-GCST90203000/GCST90202516	36635386
GCST90200081	1-oleoyl-2-docosahexaenoyl-GPC (18:1/22:6) levels	1-oleoyl-2-docosahexaenoyl-GPC (18:1/22:6) measurement	8267 European	http://ftp.ebi.ac.uk/pub/databases/gwas/summary_statistics/GCST90200001-GCST90201000/GCST90200081	36635386
GCST90201477	1-oleoyl-2-docosahexaenoyl-GPC (18:1/22:6) levels	1-oleoyl-2-docosahexaenoyl-GPC (18:1/22:6) measurement	60 African unspecified	http://ftp.ebi.ac.uk/pub/databases/gwas/summary_statistics/GCST90201001-GCST90202000/GCST90201477	36635386
GCST90203523	1-oleoyl-2-docosahexaenoyl-GPC (18:1/22:6) levels	1-oleoyl-2-docosahexaenoyl-GPC (18:1/22:6) measurement	108 South Asian	http://ftp.ebi.ac.uk/pub/databases/gwas/summary_statistics/GCST90203001-GCST90204000/GCST90203523	36635386
GCST90202520	1-oleoyl-2-docosahexaenoyl-GPC (18:1/22:6) levels	1-oleoyl-2-docosahexaenoyl-GPC (18:1/22:6) measurement	104 East Asian	http://ftp.ebi.ac.uk/pub/databases/gwas/summary_statistics/GCST90202001-GCST90203000/GCST90202520	36635386
GCST90200082	1-oleoyl-2-linoleoyl-GPE (18:1/18:2) levels	1-oleoyl-2-linoleoyl-GPE (18:1/18:2) measurement	8205 European	http://ftp.ebi.ac.uk/pub/databases/gwas/summary_statistics/GCST90200001-GCST90201000/GCST90200082	36635386
GCST90201480	1-oleoyl-2-linoleoyl-GPE (18:1/18:2) levels	1-oleoyl-2-linoleoyl-GPE (18:1/18:2) measurement	60 African unspecified	http://ftp.ebi.ac.uk/pub/databases/gwas/summary_statistics/GCST90201001-GCST90202000/GCST90201480	36635386
GCST90203525	1-oleoyl-2-linoleoyl-GPE (18:1/18:2) levels	1-oleoyl-2-linoleoyl-GPE (18:1/18:2) measurement	107 South Asian	http://ftp.ebi.ac.uk/pub/databases/gwas/summary_statistics/GCST90203001-GCST90204000/GCST90203525	36635386
GCST90202517	1-oleoyl-2-linoleoyl-GPE (18:1/18:2) levels	1-oleoyl-2-linoleoyl-GPE (18:1/18:2) measurement	102 East Asian	http://ftp.ebi.ac.uk/pub/databases/gwas/summary_statistics/GCST90202001-GCST90203000/GCST90202517	36635386
GCST90201075	1-oleoylglycerol (18:1) levels	1-oleoylglycerol (18:1) measurement	60 African unspecified	http://ftp.ebi.ac.uk/pub/databases/gwas/summary_statistics/GCST90201001-GCST90202000/GCST90201075	36635386
GCST90199676	1-oleoylglycerol (18:1) levels	1-oleoylglycerol (18:1) measurement	8225 European	http://ftp.ebi.ac.uk/pub/databases/gwas/summary_statistics/GCST90199001-GCST90200000/GCST90199676	36635386
GCST90203145	1-oleoylglycerol (18:1) levels	1-oleoylglycerol (18:1) measurement	108 South Asian	http://ftp.ebi.ac.uk/pub/databases/gwas/summary_statistics/GCST90203001-GCST90204000/GCST90203145	36635386
GCST90202110	1-oleoylglycerol (18:1) levels	1-oleoylglycerol (18:1) measurement	104 East Asian	http://ftp.ebi.ac.uk/pub/databases/gwas/summary_statistics/GCST90202001-GCST90203000/GCST90202110	36635386
GCST90203212	1-oleoyl-GPC (18:1) levels	1-oleoyl-GPC (18:1) measurement	108 South Asian	http://ftp.ebi.ac.uk/pub/databases/gwas/summary_statistics/GCST90203001-GCST90204000/GCST90203212	36635386
GCST90202167	1-oleoyl-GPC (18:1) levels	1-oleoyl-GPC (18:1) measurement	102 East Asian	http://ftp.ebi.ac.uk/pub/databases/gwas/summary_statistics/GCST90202001-GCST90203000/GCST90202167	36635386
GCST90199727	1-oleoyl-GPC (18:1) levels	1-oleoyl-GPC (18:1) measurement	8257 European	http://ftp.ebi.ac.uk/pub/databases/gwas/summary_statistics/GCST90199001-GCST90200000/GCST90199727	36635386
GCST90201139	1-oleoyl-GPC (18:1) levels	1-oleoyl-GPC (18:1) measurement	60 African unspecified	http://ftp.ebi.ac.uk/pub/databases/gwas/summary_statistics/GCST90201001-GCST90202000/GCST90201139	36635386
GCST90203269	1-oleoyl-GPE (18:1) levels	1-oleoyl-GPE (18:1) measurement	108 South Asian	http://ftp.ebi.ac.uk/pub/databases/gwas/summary_statistics/GCST90203001-GCST90204000/GCST90203269	36635386
GCST90202231	1-oleoyl-GPE (18:1) levels	1-oleoyl-GPE (18:1) measurement	104 East Asian	http://ftp.ebi.ac.uk/pub/databases/gwas/summary_statistics/GCST90202001-GCST90203000/GCST90202231	36635386
GCST90199794	1-oleoyl-GPE (18:1) levels	1-oleoyl-GPE (18:1) measurement	8283 European	http://ftp.ebi.ac.uk/pub/databases/gwas/summary_statistics/GCST90199001-GCST90200000/GCST90199794	36635386
GCST90201190	1-oleoyl-GPE (18:1) levels	1-oleoyl-GPE (18:1) measurement	60 African unspecified	http://ftp.ebi.ac.uk/pub/databases/gwas/summary_statistics/GCST90201001-GCST90202000/GCST90201190	36635386
GCST90199969	1-oleoyl-GPG (18:1) levels	1-oleoyl-GPG (18:1) measurement	6990 European	http://ftp.ebi.ac.uk/pub/databases/gwas/summary_statistics/GCST90199001-GCST90200000/GCST90199969	36635386
GCST90201377	1-oleoyl-GPG (18:1) levels	1-oleoyl-GPG (18:1) measurement	52 African unspecified	http://ftp.ebi.ac.uk/pub/databases/gwas/summary_statistics/GCST90201001-GCST90202000/GCST90201377	36635386
GCST90202412	1-oleoyl-GPG (18:1) levels	1-oleoyl-GPG (18:1) measurement	85 East Asian	http://ftp.ebi.ac.uk/pub/databases/gwas/summary_statistics/GCST90202001-GCST90203000/GCST90202412	36635386
GCST90203277	1-oleoyl-GPI (18:1) levels	1-oleoyl-GPI (18:1) measurement	107 South Asian	http://ftp.ebi.ac.uk/pub/databases/gwas/summary_statistics/GCST90203001-GCST90204000/GCST90203277	36635386
GCST90202281	1-oleoyl-GPI (18:1) levels	1-oleoyl-GPI (18:1) measurement	104 East Asian	http://ftp.ebi.ac.uk/pub/databases/gwas/summary_statistics/GCST90202001-GCST90203000/GCST90202281	36635386
GCST90199822	1-oleoyl-GPI (18:1) levels	1-oleoyl-GPI (18:1) measurement	8252 European	http://ftp.ebi.ac.uk/pub/databases/gwas/summary_statistics/GCST90199001-GCST90200000/GCST90199822	36635386
GCST90201238	1-oleoyl-GPI (18:1) levels	1-oleoyl-GPI (18:1) measurement	60 African unspecified	http://ftp.ebi.ac.uk/pub/databases/gwas/summary_statistics/GCST90201001-GCST90202000/GCST90201238	36635386
GCST90201496	1-palmitoleoyl-2-linolenoyl-GPC (16:1/18:3) levels	1-palmitoleoyl-2-linolenoyl-GPC (16:1/18:3) measurement	55 African unspecified	http://ftp.ebi.ac.uk/pub/databases/gwas/summary_statistics/GCST90201001-GCST90202000/GCST90201496	36635386
GCST90203536	1-palmitoleoyl-2-linolenoyl-GPC (16:1/18:3) levels	1-palmitoleoyl-2-linolenoyl-GPC (16:1/18:3) measurement	100 South Asian	http://ftp.ebi.ac.uk/pub/databases/gwas/summary_statistics/GCST90203001-GCST90204000/GCST90203536	36635386
GCST90200102	1-palmitoleoyl-2-linolenoyl-GPC (16:1/18:3) levels	1-palmitoleoyl-2-linolenoyl-GPC (16:1/18:3) measurement	7540 European	http://ftp.ebi.ac.uk/pub/databases/gwas/summary_statistics/GCST90200001-GCST90201000/GCST90200102	36635386
GCST90200036	1-palmitoleoylglycerol (16:1) levels	1-palmitoleoylglycerol (16:1) measurement	6432 European	http://ftp.ebi.ac.uk/pub/databases/gwas/summary_statistics/GCST90200001-GCST90201000/GCST90200036	36635386
GCST90201444	1-palmitoleoylglycerol (16:1) levels	1-palmitoleoylglycerol (16:1) measurement	41 African unspecified	http://ftp.ebi.ac.uk/pub/databases/gwas/summary_statistics/GCST90201001-GCST90202000/GCST90201444	36635386
GCST90203484	1-palmitoleoylglycerol (16:1) levels	1-palmitoleoylglycerol (16:1) measurement	83 South Asian	http://ftp.ebi.ac.uk/pub/databases/gwas/summary_statistics/GCST90203001-GCST90204000/GCST90203484	36635386
GCST90202485	1-palmitoleoylglycerol (16:1) levels	1-palmitoleoylglycerol (16:1) measurement	83 East Asian	http://ftp.ebi.ac.uk/pub/databases/gwas/summary_statistics/GCST90202001-GCST90203000/GCST90202485	36635386
GCST90203241	1-palmitoleoyl-GPC (16:1) levels	1-palmitoleoyl-GPC (16:1) measurement	107 South Asian	http://ftp.ebi.ac.uk/pub/databases/gwas/summary_statistics/GCST90203001-GCST90204000/GCST90203241	36635386
GCST90202219	1-palmitoleoyl-GPC (16:1) levels	1-palmitoleoyl-GPC (16:1) measurement	104 East Asian	http://ftp.ebi.ac.uk/pub/databases/gwas/summary_statistics/GCST90202001-GCST90203000/GCST90202219	36635386
GCST90199777	1-palmitoleoyl-GPC (16:1) levels	1-palmitoleoyl-GPC (16:1) measurement	8227 European	http://ftp.ebi.ac.uk/pub/databases/gwas/summary_statistics/GCST90199001-GCST90200000/GCST90199777	36635386
GCST90201189	1-palmitoleoyl-GPC (16:1) levels	1-palmitoleoyl-GPC (16:1) measurement	60 African unspecified	http://ftp.ebi.ac.uk/pub/databases/gwas/summary_statistics/GCST90201001-GCST90202000/GCST90201189	36635386
GCST90200692	1-palmitoyl-2-arachidonoyl-gpc (16:0/20:4n6) levels	1-palmitoyl-2-arachidonoyl-GPC (16:0/20:4n6) measurement	8238 European	http://ftp.ebi.ac.uk/pub/databases/gwas/summary_statistics/GCST90200001-GCST90201000/GCST90200692	36635386
GCST90203476	1-palmitoyl-2-arachidonoyl-gpc (16:0/20:4n6) levels	1-palmitoyl-2-arachidonoyl-GPC (16:0/20:4n6) measurement	107 South Asian	http://ftp.ebi.ac.uk/pub/databases/gwas/summary_statistics/GCST90203001-GCST90204000/GCST90203476	36635386
GCST90202482	1-palmitoyl-2-arachidonoyl-gpc (16:0/20:4n6) levels	1-palmitoyl-2-arachidonoyl-GPC (16:0/20:4n6) measurement	104 East Asian	http://ftp.ebi.ac.uk/pub/databases/gwas/summary_statistics/GCST90202001-GCST90203000/GCST90202482	36635386
GCST90200054	1-palmitoyl-2-arachidonoyl-GPE (16:0/20:4) levels	1-palmitoyl-2-arachidonoyl-GPE (16:0/20:4) measurement	8257 European	http://ftp.ebi.ac.uk/pub/databases/gwas/summary_statistics/GCST90200001-GCST90201000/GCST90200054	36635386
GCST90201456	1-palmitoyl-2-arachidonoyl-GPE (16:0/20:4) levels	1-palmitoyl-2-arachidonoyl-GPE (16:0/20:4) measurement	60 African unspecified	http://ftp.ebi.ac.uk/pub/databases/gwas/summary_statistics/GCST90201001-GCST90202000/GCST90201456	36635386
GCST90203497	1-palmitoyl-2-arachidonoyl-GPE (16:0/20:4) levels	1-palmitoyl-2-arachidonoyl-GPE (16:0/20:4) measurement	107 South Asian	http://ftp.ebi.ac.uk/pub/databases/gwas/summary_statistics/GCST90203001-GCST90204000/GCST90203497	36635386
GCST90200062	1-palmitoyl-2-arachidonoyl-GPI (16:0/20:4) levels	1-palmitoyl-2-arachidonoyl-GPI (16:0/20:4) measurement	8057 European	http://ftp.ebi.ac.uk/pub/databases/gwas/summary_statistics/GCST90200001-GCST90201000/GCST90200062	36635386
GCST90201459	1-palmitoyl-2-arachidonoyl-GPI (16:0/20:4) levels	1-palmitoyl-2-arachidonoyl-GPI (16:0/20:4) measurement	59 African unspecified	http://ftp.ebi.ac.uk/pub/databases/gwas/summary_statistics/GCST90201001-GCST90202000/GCST90201459	36635386
GCST90203507	1-palmitoyl-2-arachidonoyl-GPI (16:0/20:4) levels	1-palmitoyl-2-arachidonoyl-GPI (16:0/20:4) measurement	102 South Asian	http://ftp.ebi.ac.uk/pub/databases/gwas/summary_statistics/GCST90203001-GCST90204000/GCST90203507	36635386
GCST90202499	1-palmitoyl-2-arachidonoyl-GPI (16:0/20:4) levels	1-palmitoyl-2-arachidonoyl-GPI (16:0/20:4) measurement	101 East Asian	http://ftp.ebi.ac.uk/pub/databases/gwas/summary_statistics/GCST90202001-GCST90203000/GCST90202499	36635386
GCST90200051	1-palmitoyl-2-dihomo-linolenoyl-GPC (16:0/20:3n3 or 6) levels	1-palmitoyl-2-dihomo-linolenoyl-GPC (16:0/20:3n3 or 6) measurement	8230 European	http://ftp.ebi.ac.uk/pub/databases/gwas/summary_statistics/GCST90200001-GCST90201000/GCST90200051	36635386
GCST90201455	1-palmitoyl-2-dihomo-linolenoyl-GPC (16:0/20:3n3 or 6) levels	1-palmitoyl-2-dihomo-linolenoyl-GPC (16:0/20:3n3 or 6) measurement	60 African unspecified	http://ftp.ebi.ac.uk/pub/databases/gwas/summary_statistics/GCST90201001-GCST90202000/GCST90201455	36635386
GCST90203495	1-palmitoyl-2-dihomo-linolenoyl-GPC (16:0/20:3n3 or 6) levels	1-palmitoyl-2-dihomo-linolenoyl-GPC (16:0/20:3n3 or 6) measurement	107 South Asian	http://ftp.ebi.ac.uk/pub/databases/gwas/summary_statistics/GCST90203001-GCST90204000/GCST90203495	36635386
GCST90202496	1-palmitoyl-2-dihomo-linolenoyl-GPC (16:0/20:3n3 or 6) levels	1-palmitoyl-2-dihomo-linolenoyl-GPC (16:0/20:3n3 or 6) measurement	103 East Asian	http://ftp.ebi.ac.uk/pub/databases/gwas/summary_statistics/GCST90202001-GCST90203000/GCST90202496	36635386
GCST90200043	1-palmitoyl-2-docosahexaenoyl-gpc (16:0/22:6) levels	1-palmitoyl-2-docosahexaenoyl-GPC (16:0/22:6) measurement	8256 European	http://ftp.ebi.ac.uk/pub/databases/gwas/summary_statistics/GCST90200001-GCST90201000/GCST90200043	36635386
GCST90201440	1-palmitoyl-2-docosahexaenoyl-gpc (16:0/22:6) levels	1-palmitoyl-2-docosahexaenoyl-GPC (16:0/22:6) measurement	60 African unspecified	http://ftp.ebi.ac.uk/pub/databases/gwas/summary_statistics/GCST90201001-GCST90202000/GCST90201440	36635386
GCST90203474	1-palmitoyl-2-docosahexaenoyl-gpc (16:0/22:6) levels	1-palmitoyl-2-docosahexaenoyl-GPC (16:0/22:6) measurement	108 South Asian	http://ftp.ebi.ac.uk/pub/databases/gwas/summary_statistics/GCST90203001-GCST90204000/GCST90203474	36635386
GCST90202476	1-palmitoyl-2-docosahexaenoyl-gpc (16:0/22:6) levels	1-palmitoyl-2-docosahexaenoyl-GPC (16:0/22:6) measurement	104 East Asian	http://ftp.ebi.ac.uk/pub/databases/gwas/summary_statistics/GCST90202001-GCST90203000/GCST90202476	36635386
GCST90200063	1-palmitoyl-2-docosahexaenoyl-GPE (16:0/22:6) levels	1-palmitoyl-2-docosahexaenoyl-GPE (16:0/22:6) measurement	8262 European	http://ftp.ebi.ac.uk/pub/databases/gwas/summary_statistics/GCST90200001-GCST90201000/GCST90200063	36635386
GCST90201454	1-palmitoyl-2-docosahexaenoyl-GPE (16:0/22:6) levels	1-palmitoyl-2-docosahexaenoyl-GPE (16:0/22:6) measurement	60 African unspecified	http://ftp.ebi.ac.uk/pub/databases/gwas/summary_statistics/GCST90201001-GCST90202000/GCST90201454	36635386
GCST90203499	1-palmitoyl-2-docosahexaenoyl-GPE (16:0/22:6) levels	1-palmitoyl-2-docosahexaenoyl-GPE (16:0/22:6) measurement	108 South Asian	http://ftp.ebi.ac.uk/pub/databases/gwas/summary_statistics/GCST90203001-GCST90204000/GCST90203499	36635386
GCST90200330	1-palmitoyl-2-linoleoyl-gpc (16:0/18:2) levels	1-palmitoyl-2-linoleoyl-GPC (16:0/18:2) measurement	8230 European	http://ftp.ebi.ac.uk/pub/databases/gwas/summary_statistics/GCST90200001-GCST90201000/GCST90200330	36635386
GCST90203770	1-palmitoyl-2-linoleoyl-gpc (16:0/18:2) levels	1-palmitoyl-2-linoleoyl-GPC (16:0/18:2) measurement	108 South Asian	http://ftp.ebi.ac.uk/pub/databases/gwas/summary_statistics/GCST90203001-GCST90204000/GCST90203770	36635386
GCST90201742	1-palmitoyl-2-linoleoyl-gpc (16:0/18:2) levels	1-palmitoyl-2-linoleoyl-GPC (16:0/18:2) measurement	60 African unspecified	http://ftp.ebi.ac.uk/pub/databases/gwas/summary_statistics/GCST90201001-GCST90202000/GCST90201742	36635386
GCST90203295	1-palmitoyl-2-linoleoyl-GPE (16:0/18:2) levels	1-palmitoyl-2-linoleoyl-GPE (16:0/18:2) measurement	108 South Asian	http://ftp.ebi.ac.uk/pub/databases/gwas/summary_statistics/GCST90203001-GCST90204000/GCST90203295	36635386
GCST90202280	1-palmitoyl-2-linoleoyl-GPE (16:0/18:2) levels	1-palmitoyl-2-linoleoyl-GPE (16:0/18:2) measurement	103 East Asian	http://ftp.ebi.ac.uk/pub/databases/gwas/summary_statistics/GCST90202001-GCST90203000/GCST90202280	36635386
GCST90199844	1-palmitoyl-2-linoleoyl-GPE (16:0/18:2) levels	1-palmitoyl-2-linoleoyl-GPE (16:0/18:2) measurement	8266 European	http://ftp.ebi.ac.uk/pub/databases/gwas/summary_statistics/GCST90199001-GCST90200000/GCST90199844	36635386
GCST90201251	1-palmitoyl-2-linoleoyl-GPE (16:0/18:2) levels	1-palmitoyl-2-linoleoyl-GPE (16:0/18:2) measurement	60 African unspecified	http://ftp.ebi.ac.uk/pub/databases/gwas/summary_statistics/GCST90201001-GCST90202000/GCST90201251	36635386
GCST90202771	1-palmitoyl-2-linoleoyl-GPI (16:0/18:2) levels	1-palmitoyl-2-linoleoyl-GPI (16:0/18:2) measurement	101 East Asian	http://ftp.ebi.ac.uk/pub/databases/gwas/summary_statistics/GCST90202001-GCST90203000/GCST90202771	36635386
GCST90200332	1-palmitoyl-2-linoleoyl-GPI (16:0/18:2) levels	1-palmitoyl-2-linoleoyl-GPI (16:0/18:2) measurement	8115 European	http://ftp.ebi.ac.uk/pub/databases/gwas/summary_statistics/GCST90200001-GCST90201000/GCST90200332	36635386
GCST90203763	1-palmitoyl-2-linoleoyl-GPI (16:0/18:2) levels	1-palmitoyl-2-linoleoyl-GPI (16:0/18:2) measurement	104 South Asian	http://ftp.ebi.ac.uk/pub/databases/gwas/summary_statistics/GCST90203001-GCST90204000/GCST90203763	36635386
GCST90201743	1-palmitoyl-2-linoleoyl-GPI (16:0/18:2) levels	1-palmitoyl-2-linoleoyl-GPI (16:0/18:2) measurement	59 African unspecified	http://ftp.ebi.ac.uk/pub/databases/gwas/summary_statistics/GCST90201001-GCST90202000/GCST90201743	36635386
GCST90202770	1-palmitoyl-2-oleoyl-gpc (16:0/18:1) levels	1-palmitoyl-2-oleoyl-GPC (16:0/18:1) measurement	104 East Asian	http://ftp.ebi.ac.uk/pub/databases/gwas/summary_statistics/GCST90202001-GCST90203000/GCST90202770	36635386
GCST90200340	1-palmitoyl-2-oleoyl-gpc (16:0/18:1) levels	1-palmitoyl-2-oleoyl-GPC (16:0/18:1) measurement	8249 European	http://ftp.ebi.ac.uk/pub/databases/gwas/summary_statistics/GCST90200001-GCST90201000/GCST90200340	36635386
GCST90203771	1-palmitoyl-2-oleoyl-gpc (16:0/18:1) levels	1-palmitoyl-2-oleoyl-GPC (16:0/18:1) measurement	108 South Asian	http://ftp.ebi.ac.uk/pub/databases/gwas/summary_statistics/GCST90203001-GCST90204000/GCST90203771	36635386
GCST90201729	1-palmitoyl-2-oleoyl-gpc (16:0/18:1) levels	1-palmitoyl-2-oleoyl-GPC (16:0/18:1) measurement	60 African unspecified	http://ftp.ebi.ac.uk/pub/databases/gwas/summary_statistics/GCST90201001-GCST90202000/GCST90201729	36635386
GCST90200331	1-palmitoyl-2-oleoyl-GPE (16:0/18:1) levels	1-palmitoyl-2-oleoyl-GPE (16:0/18:1) measurement	8262 European	http://ftp.ebi.ac.uk/pub/databases/gwas/summary_statistics/GCST90200001-GCST90201000/GCST90200331	36635386
GCST90203762	1-palmitoyl-2-oleoyl-GPE (16:0/18:1) levels	1-palmitoyl-2-oleoyl-GPE (16:0/18:1) measurement	108 South Asian	http://ftp.ebi.ac.uk/pub/databases/gwas/summary_statistics/GCST90203001-GCST90204000/GCST90203762	36635386
GCST90201740	1-palmitoyl-2-oleoyl-GPE (16:0/18:1) levels	1-palmitoyl-2-oleoyl-GPE (16:0/18:1) measurement	60 African unspecified	http://ftp.ebi.ac.uk/pub/databases/gwas/summary_statistics/GCST90201001-GCST90202000/GCST90201740	36635386
GCST90200080	1-palmitoyl-2-oleoyl-GPI (16:0/18:1) levels	1-palmitoyl-2-oleoyl-GPI (16:0/18:1) measurement	8123 European	http://ftp.ebi.ac.uk/pub/databases/gwas/summary_statistics/GCST90200001-GCST90201000/GCST90200080	36635386
GCST90201478	1-palmitoyl-2-oleoyl-GPI (16:0/18:1) levels	1-palmitoyl-2-oleoyl-GPI (16:0/18:1) measurement	59 African unspecified	http://ftp.ebi.ac.uk/pub/databases/gwas/summary_statistics/GCST90201001-GCST90202000/GCST90201478	36635386
GCST90202507	1-palmitoyl-2-oleoyl-GPI (16:0/18:1) levels	1-palmitoyl-2-oleoyl-GPI (16:0/18:1) measurement	103 East Asian	http://ftp.ebi.ac.uk/pub/databases/gwas/summary_statistics/GCST90202001-GCST90203000/GCST90202507	36635386
GCST90200038	1-palmitoyl-2-palmitoleoyl-gpc (16:0/16:1) levels	1-palmitoyl-2-palmitoleoyl-GPC(16:0/16:1) measurement	8276 European	http://ftp.ebi.ac.uk/pub/databases/gwas/summary_statistics/GCST90200001-GCST90201000/GCST90200038	36635386
GCST90201453	1-palmitoyl-2-palmitoleoyl-gpc (16:0/16:1) levels	1-palmitoyl-2-palmitoleoyl-GPC(16:0/16:1) measurement	60 African unspecified	http://ftp.ebi.ac.uk/pub/databases/gwas/summary_statistics/GCST90201001-GCST90202000/GCST90201453	36635386
GCST90203501	1-palmitoyl-2-palmitoleoyl-gpc (16:0/16:1) levels	1-palmitoyl-2-palmitoleoyl-GPC(16:0/16:1) measurement	108 South Asian	http://ftp.ebi.ac.uk/pub/databases/gwas/summary_statistics/GCST90203001-GCST90204000/GCST90203501	36635386
GCST90202492	1-palmitoyl-2-palmitoleoyl-gpc (16:0/16:1) levels	1-palmitoyl-2-palmitoleoyl-GPC(16:0/16:1) measurement	104 East Asian	http://ftp.ebi.ac.uk/pub/databases/gwas/summary_statistics/GCST90202001-GCST90203000/GCST90202492	36635386
GCST90200041	1-palmitoyl-2-stearoyl-gpc (16:0/18:0) levels	1-palmitoyl-2-stearoyl-GPC (16:0/18:0) measurement	8271 European	http://ftp.ebi.ac.uk/pub/databases/gwas/summary_statistics/GCST90200001-GCST90201000/GCST90200041	36635386
GCST90201447	1-palmitoyl-2-stearoyl-gpc (16:0/18:0) levels	1-palmitoyl-2-stearoyl-GPC (16:0/18:0) measurement	60 African unspecified	http://ftp.ebi.ac.uk/pub/databases/gwas/summary_statistics/GCST90201001-GCST90202000/GCST90201447	36635386
GCST90203481	1-palmitoyl-2-stearoyl-gpc (16:0/18:0) levels	1-palmitoyl-2-stearoyl-GPC (16:0/18:0) measurement	108 South Asian	http://ftp.ebi.ac.uk/pub/databases/gwas/summary_statistics/GCST90203001-GCST90204000/GCST90203481	36635386
GCST90202467	1-palmitoyl-2-stearoyl-gpc (16:0/18:0) levels	1-palmitoyl-2-stearoyl-GPC (16:0/18:0) measurement	104 East Asian	http://ftp.ebi.ac.uk/pub/databases/gwas/summary_statistics/GCST90202001-GCST90203000/GCST90202467	36635386
GCST90202158	1-palmitoyl-GPC (16:0) levels	1-palmitoyl-GPC (16:0) measurement	103 East Asian	http://ftp.ebi.ac.uk/pub/databases/gwas/summary_statistics/GCST90202001-GCST90203000/GCST90202158	36635386
GCST90199733	1-palmitoyl-GPC (16:0) levels	1-palmitoyl-GPC (16:0) measurement	8232 European	http://ftp.ebi.ac.uk/pub/databases/gwas/summary_statistics/GCST90199001-GCST90200000/GCST90199733	36635386
GCST90203189	1-palmitoyl-GPC (16:0) levels	1-palmitoyl-GPC (16:0) measurement	106 South Asian	http://ftp.ebi.ac.uk/pub/databases/gwas/summary_statistics/GCST90203001-GCST90204000/GCST90203189	36635386
GCST90201135	1-palmitoyl-GPC (16:0) levels	1-palmitoyl-GPC (16:0) measurement	59 African unspecified	http://ftp.ebi.ac.uk/pub/databases/gwas/summary_statistics/GCST90201001-GCST90202000/GCST90201135	36635386
GCST90203268	1-palmitoyl-GPE (16:0) levels	1-palmitoyl-GPE (16:0) measurement	108 South Asian	http://ftp.ebi.ac.uk/pub/databases/gwas/summary_statistics/GCST90203001-GCST90204000/GCST90203268	36635386
GCST90202234	1-palmitoyl-GPE (16:0) levels	1-palmitoyl-GPE (16:0) measurement	104 East Asian	http://ftp.ebi.ac.uk/pub/databases/gwas/summary_statistics/GCST90202001-GCST90203000/GCST90202234	36635386
GCST90199792	1-palmitoyl-GPE (16:0) levels	1-palmitoyl-GPE (16:0) measurement	8276 European	http://ftp.ebi.ac.uk/pub/databases/gwas/summary_statistics/GCST90199001-GCST90200000/GCST90199792	36635386
GCST90201196	1-palmitoyl-GPE (16:0) levels	1-palmitoyl-GPE (16:0) measurement	60 African unspecified	http://ftp.ebi.ac.uk/pub/databases/gwas/summary_statistics/GCST90201001-GCST90202000/GCST90201196	36635386
GCST90199968	1-palmitoyl-GPG (16:0) levels	1-palmitoyl-GPG (16:0) measurement	7708 European	http://ftp.ebi.ac.uk/pub/databases/gwas/summary_statistics/GCST90199001-GCST90200000/GCST90199968	36635386
GCST90203418	1-palmitoyl-GPG (16:0) levels	1-palmitoyl-GPG (16:0) measurement	98 South Asian	http://ftp.ebi.ac.uk/pub/databases/gwas/summary_statistics/GCST90203001-GCST90204000/GCST90203418	36635386
GCST90201375	1-palmitoyl-GPG (16:0) levels	1-palmitoyl-GPG (16:0) measurement	57 African unspecified	http://ftp.ebi.ac.uk/pub/databases/gwas/summary_statistics/GCST90201001-GCST90202000/GCST90201375	36635386
GCST90202416	1-palmitoyl-GPG (16:0) levels	1-palmitoyl-GPG (16:0) measurement	100 East Asian	http://ftp.ebi.ac.uk/pub/databases/gwas/summary_statistics/GCST90202001-GCST90203000/GCST90202416	36635386
GCST90203279	1-palmitoyl-GPI (16:0) levels	1-palmitoyl-GPI (16:0) measurement	108 South Asian	http://ftp.ebi.ac.uk/pub/databases/gwas/summary_statistics/GCST90203001-GCST90204000/GCST90203279	36635386
GCST90202262	1-palmitoyl-GPI (16:0) levels	1-palmitoyl-GPI (16:0) measurement	103 East Asian	http://ftp.ebi.ac.uk/pub/databases/gwas/summary_statistics/GCST90202001-GCST90203000/GCST90202262	36635386
GCST90199810	1-palmitoyl-GPI (16:0) levels	1-palmitoyl-GPI (16:0) measurement	8246 European	http://ftp.ebi.ac.uk/pub/databases/gwas/summary_statistics/GCST90199001-GCST90200000/GCST90199810	36635386
GCST90201228	1-palmitoyl-GPI (16:0) levels	1-palmitoyl-GPI (16:0) measurement	60 African unspecified	http://ftp.ebi.ac.uk/pub/databases/gwas/summary_statistics/GCST90201001-GCST90202000/GCST90201228	36635386
GCST90203270	1-ribosyl-imidazoleacetate levels	1-ribosyl-imidazoleacetate measurement	108 South Asian	http://ftp.ebi.ac.uk/pub/databases/gwas/summary_statistics/GCST90203001-GCST90204000/GCST90203270	36635386
GCST90202260	1-ribosyl-imidazoleacetate levels	1-ribosyl-imidazoleacetate measurement	104 East Asian	http://ftp.ebi.ac.uk/pub/databases/gwas/summary_statistics/GCST90202001-GCST90203000/GCST90202260	36635386
GCST90199815	1-ribosyl-imidazoleacetate levels	1-ribosyl-imidazoleacetate measurement	8205 European	http://ftp.ebi.ac.uk/pub/databases/gwas/summary_statistics/GCST90199001-GCST90200000/GCST90199815	36635386
GCST90201215	1-ribosyl-imidazoleacetate levels	1-ribosyl-imidazoleacetate measurement	60 African unspecified	http://ftp.ebi.ac.uk/pub/databases/gwas/summary_statistics/GCST90201001-GCST90202000/GCST90201215	36635386
GCST90200685	1-stearoyl-2-arachidonoyl-gpc (18:0/20:4) levels	1-stearoyl-2-arachidonoyl-GPC (18:0/20:4) measurement	8253 European	http://ftp.ebi.ac.uk/pub/databases/gwas/summary_statistics/GCST90200001-GCST90201000/GCST90200685	36635386
GCST90203296	1-stearoyl-2-arachidonoyl-gpc (18:0/20:4) levels	1-stearoyl-2-arachidonoyl-GPC (18:0/20:4) measurement	108 South Asian	http://ftp.ebi.ac.uk/pub/databases/gwas/summary_statistics/GCST90203001-GCST90204000/GCST90203296	36635386
GCST90202273	1-stearoyl-2-arachidonoyl-gpc (18:0/20:4) levels	1-stearoyl-2-arachidonoyl-GPC (18:0/20:4) measurement	103 East Asian	http://ftp.ebi.ac.uk/pub/databases/gwas/summary_statistics/GCST90202001-GCST90203000/GCST90202273	36635386
GCST90200045	1-stearoyl-2-arachidonoyl-GPE (18:0/20:4) levels	1-stearoyl-2-arachidonoyl-GPE (18:0/20:4) measurement	8259 European	http://ftp.ebi.ac.uk/pub/databases/gwas/summary_statistics/GCST90200001-GCST90201000/GCST90200045	36635386
GCST90201451	1-stearoyl-2-arachidonoyl-GPE (18:0/20:4) levels	1-stearoyl-2-arachidonoyl-GPE (18:0/20:4) measurement	60 African unspecified	http://ftp.ebi.ac.uk/pub/databases/gwas/summary_statistics/GCST90201001-GCST90202000/GCST90201451	36635386
GCST90203491	1-stearoyl-2-arachidonoyl-GPE (18:0/20:4) levels	1-stearoyl-2-arachidonoyl-GPE (18:0/20:4) measurement	107 South Asian	http://ftp.ebi.ac.uk/pub/databases/gwas/summary_statistics/GCST90203001-GCST90204000/GCST90203491	36635386
GCST90202489	1-stearoyl-2-arachidonoyl-GPE (18:0/20:4) levels	1-stearoyl-2-arachidonoyl-GPE (18:0/20:4) measurement	103 East Asian	http://ftp.ebi.ac.uk/pub/databases/gwas/summary_statistics/GCST90202001-GCST90203000/GCST90202489	36635386
GCST90199649	1-stearoyl-2-arachidonoyl-GPI (18:0/20:4) levels	1-stearoyl-2-arachidonoyl-GPI (18:0/20:4) measurement	8134 European	http://ftp.ebi.ac.uk/pub/databases/gwas/summary_statistics/GCST90199001-GCST90200000/GCST90199649	36635386
GCST90203121	1-stearoyl-2-arachidonoyl-GPI (18:0/20:4) levels	1-stearoyl-2-arachidonoyl-GPI (18:0/20:4) measurement	105 South Asian	http://ftp.ebi.ac.uk/pub/databases/gwas/summary_statistics/GCST90203001-GCST90204000/GCST90203121	36635386
GCST90202087	1-stearoyl-2-arachidonoyl-GPI (18:0/20:4) levels	1-stearoyl-2-arachidonoyl-GPI (18:0/20:4) measurement	103 East Asian	http://ftp.ebi.ac.uk/pub/databases/gwas/summary_statistics/GCST90202001-GCST90203000/GCST90202087	36635386
GCST90200046	1-stearoyl-2-docosahexaenoyl-gpc (18:0/22:6) levels	1-stearoyl-2-docosahexaenoyl-GPC (18:0/22:6) measurement	8257 European	http://ftp.ebi.ac.uk/pub/databases/gwas/summary_statistics/GCST90200001-GCST90201000/GCST90200046	36635386
GCST90201442	1-stearoyl-2-docosahexaenoyl-gpc (18:0/22:6) levels	1-stearoyl-2-docosahexaenoyl-GPC (18:0/22:6) measurement	60 African unspecified	http://ftp.ebi.ac.uk/pub/databases/gwas/summary_statistics/GCST90201001-GCST90202000/GCST90201442	36635386
GCST90203477	1-stearoyl-2-docosahexaenoyl-gpc (18:0/22:6) levels	1-stearoyl-2-docosahexaenoyl-GPC (18:0/22:6) measurement	108 South Asian	http://ftp.ebi.ac.uk/pub/databases/gwas/summary_statistics/GCST90203001-GCST90204000/GCST90203477	36635386
GCST90202474	1-stearoyl-2-docosahexaenoyl-gpc (18:0/22:6) levels	1-stearoyl-2-docosahexaenoyl-GPC (18:0/22:6) measurement	104 East Asian	http://ftp.ebi.ac.uk/pub/databases/gwas/summary_statistics/GCST90202001-GCST90203000/GCST90202474	36635386
GCST90200065	1-stearoyl-2-docosahexaenoyl-GPE (18:0/22:6) levels	1-stearoyl-2-docosahexaenoyl-GPE (18:0/22:6) measurement	8251 European	http://ftp.ebi.ac.uk/pub/databases/gwas/summary_statistics/GCST90200001-GCST90201000/GCST90200065	36635386
GCST90201457	1-stearoyl-2-docosahexaenoyl-GPE (18:0/22:6) levels	1-stearoyl-2-docosahexaenoyl-GPE (18:0/22:6) measurement	59 African unspecified	http://ftp.ebi.ac.uk/pub/databases/gwas/summary_statistics/GCST90201001-GCST90202000/GCST90201457	36635386
GCST90203504	1-stearoyl-2-docosahexaenoyl-GPE (18:0/22:6) levels	1-stearoyl-2-docosahexaenoyl-GPE (18:0/22:6) measurement	108 South Asian	http://ftp.ebi.ac.uk/pub/databases/gwas/summary_statistics/GCST90203001-GCST90204000/GCST90203504	36635386
GCST90202503	1-stearoyl-2-docosahexaenoyl-GPE (18:0/22:6) levels	1-stearoyl-2-docosahexaenoyl-GPE (18:0/22:6) measurement	103 East Asian	http://ftp.ebi.ac.uk/pub/databases/gwas/summary_statistics/GCST90202001-GCST90203000/GCST90202503	36635386
GCST90200037	1-stearoyl-2-linoleoyl-gpc (18:0/18:2) levels	1-stearoyl-2-linoleoyl-GPC (18:0/18:2) measurement	8231 European	http://ftp.ebi.ac.uk/pub/databases/gwas/summary_statistics/GCST90200001-GCST90201000/GCST90200037	36635386
GCST90201460	1-stearoyl-2-linoleoyl-gpc (18:0/18:2) levels	1-stearoyl-2-linoleoyl-GPC (18:0/18:2) measurement	60 African unspecified	http://ftp.ebi.ac.uk/pub/databases/gwas/summary_statistics/GCST90201001-GCST90202000/GCST90201460	36635386
GCST90203503	1-stearoyl-2-linoleoyl-gpc (18:0/18:2) levels	1-stearoyl-2-linoleoyl-GPC (18:0/18:2) measurement	107 South Asian	http://ftp.ebi.ac.uk/pub/databases/gwas/summary_statistics/GCST90203001-GCST90204000/GCST90203503	36635386
GCST90202491	1-stearoyl-2-linoleoyl-gpc (18:0/18:2) levels	1-stearoyl-2-linoleoyl-GPC (18:0/18:2) measurement	104 East Asian	http://ftp.ebi.ac.uk/pub/databases/gwas/summary_statistics/GCST90202001-GCST90203000/GCST90202491	36635386
GCST90200039	1-stearoyl-2-linoleoyl-GPE (18:0/18:2) levels	1-stearoyl-2-linoleoyl-GPE (18:0/18:2) measurement	8241 European	http://ftp.ebi.ac.uk/pub/databases/gwas/summary_statistics/GCST90200001-GCST90201000/GCST90200039	36635386
GCST90201452	1-stearoyl-2-linoleoyl-GPE (18:0/18:2) levels	1-stearoyl-2-linoleoyl-GPE (18:0/18:2) measurement	59 African unspecified	http://ftp.ebi.ac.uk/pub/databases/gwas/summary_statistics/GCST90201001-GCST90202000/GCST90201452	36635386
GCST90203487	1-stearoyl-2-linoleoyl-GPE (18:0/18:2) levels	1-stearoyl-2-linoleoyl-GPE (18:0/18:2) measurement	108 South Asian	http://ftp.ebi.ac.uk/pub/databases/gwas/summary_statistics/GCST90203001-GCST90204000/GCST90203487	36635386
GCST90200067	1-stearoyl-2-linoleoyl-GPI (18:0/18:2) levels	1-stearoyl-2-linoleoyl-GPI (18:0/18:2) measurement	8113 European	http://ftp.ebi.ac.uk/pub/databases/gwas/summary_statistics/GCST90200001-GCST90201000/GCST90200067	36635386
GCST90201445	1-stearoyl-2-linoleoyl-GPI (18:0/18:2) levels	1-stearoyl-2-linoleoyl-GPI (18:0/18:2) measurement	59 African unspecified	http://ftp.ebi.ac.uk/pub/databases/gwas/summary_statistics/GCST90201001-GCST90202000/GCST90201445	36635386
GCST90203494	1-stearoyl-2-linoleoyl-GPI (18:0/18:2) levels	1-stearoyl-2-linoleoyl-GPI (18:0/18:2) measurement	105 South Asian	http://ftp.ebi.ac.uk/pub/databases/gwas/summary_statistics/GCST90203001-GCST90204000/GCST90203494	36635386
GCST90202486	1-stearoyl-2-linoleoyl-GPI (18:0/18:2) levels	1-stearoyl-2-linoleoyl-GPI (18:0/18:2) measurement	101 East Asian	http://ftp.ebi.ac.uk/pub/databases/gwas/summary_statistics/GCST90202001-GCST90203000/GCST90202486	36635386
GCST90200028	1-stearoyl-2-oleoyl-gpc (18:0/18:1) levels	1-stearoyl-2-oleoyl-GPC (18:0/18:1) measurement	8257 European	http://ftp.ebi.ac.uk/pub/databases/gwas/summary_statistics/GCST90200001-GCST90201000/GCST90200028	36635386
GCST90201439	1-stearoyl-2-oleoyl-gpc (18:0/18:1) levels	1-stearoyl-2-oleoyl-GPC (18:0/18:1) measurement	60 African unspecified	http://ftp.ebi.ac.uk/pub/databases/gwas/summary_statistics/GCST90201001-GCST90202000/GCST90201439	36635386
GCST90203478	1-stearoyl-2-oleoyl-gpc (18:0/18:1) levels	1-stearoyl-2-oleoyl-GPC (18:0/18:1) measurement	108 South Asian	http://ftp.ebi.ac.uk/pub/databases/gwas/summary_statistics/GCST90203001-GCST90204000/GCST90203478	36635386
GCST90202478	1-stearoyl-2-oleoyl-gpc (18:0/18:1) levels	1-stearoyl-2-oleoyl-GPC (18:0/18:1) measurement	103 East Asian	http://ftp.ebi.ac.uk/pub/databases/gwas/summary_statistics/GCST90202001-GCST90203000/GCST90202478	36635386
GCST90203298	1-stearoyl-2-oleoyl-GPE (18:0/18:1) levels	1-stearoyl-2-oleoyl-GPE (18:0/18:1) measurement	108 South Asian	http://ftp.ebi.ac.uk/pub/databases/gwas/summary_statistics/GCST90203001-GCST90204000/GCST90203298	36635386
GCST90202275	1-stearoyl-2-oleoyl-GPE (18:0/18:1) levels	1-stearoyl-2-oleoyl-GPE (18:0/18:1) measurement	104 East Asian	http://ftp.ebi.ac.uk/pub/databases/gwas/summary_statistics/GCST90202001-GCST90203000/GCST90202275	36635386
GCST90199831	1-stearoyl-2-oleoyl-GPE (18:0/18:1) levels	1-stearoyl-2-oleoyl-GPE (18:0/18:1) measurement	8273 European	http://ftp.ebi.ac.uk/pub/databases/gwas/summary_statistics/GCST90199001-GCST90200000/GCST90199831	36635386
GCST90201241	1-stearoyl-2-oleoyl-GPE (18:0/18:1) levels	1-stearoyl-2-oleoyl-GPE (18:0/18:1) measurement	60 African unspecified	http://ftp.ebi.ac.uk/pub/databases/gwas/summary_statistics/GCST90201001-GCST90202000/GCST90201241	36635386
GCST90200077	1-stearoyl-2-oleoyl-GPI (18:0/18:1) levels	1-stearoyl-2-oleoyl-GPI (18:0/18:1) measurement	8111 European	http://ftp.ebi.ac.uk/pub/databases/gwas/summary_statistics/GCST90200001-GCST90201000/GCST90200077	36635386
GCST90201485	1-stearoyl-2-oleoyl-GPI (18:0/18:1) levels	1-stearoyl-2-oleoyl-GPI (18:0/18:1) measurement	59 African unspecified	http://ftp.ebi.ac.uk/pub/databases/gwas/summary_statistics/GCST90201001-GCST90202000/GCST90201485	36635386
GCST90202506	1-stearoyl-2-oleoyl-GPI (18:0/18:1) levels	1-stearoyl-2-oleoyl-GPI (18:0/18:1) measurement	101 East Asian	http://ftp.ebi.ac.uk/pub/databases/gwas/summary_statistics/GCST90202001-GCST90203000/GCST90202506	36635386
GCST90201056	1-stearoyl-2-oleoyl-GPS (18:0/18:1) levels	1-stearoyl-2-oleoyl-GPS (18:0/18:1) measurement	57 African unspecified	http://ftp.ebi.ac.uk/pub/databases/gwas/summary_statistics/GCST90201001-GCST90202000/GCST90201056	36635386
GCST90199652	1-stearoyl-2-oleoyl-GPS (18:0/18:1) levels	1-stearoyl-2-oleoyl-GPS (18:0/18:1) measurement	8055 European	http://ftp.ebi.ac.uk/pub/databases/gwas/summary_statistics/GCST90199001-GCST90200000/GCST90199652	36635386
GCST90203124	1-stearoyl-2-oleoyl-GPS (18:0/18:1) levels	1-stearoyl-2-oleoyl-GPS (18:0/18:1) measurement	104 South Asian	http://ftp.ebi.ac.uk/pub/databases/gwas/summary_statistics/GCST90203001-GCST90204000/GCST90203124	36635386
GCST90202094	1-stearoyl-2-oleoyl-GPS (18:0/18:1) levels	1-stearoyl-2-oleoyl-GPS (18:0/18:1) measurement	101 East Asian	http://ftp.ebi.ac.uk/pub/databases/gwas/summary_statistics/GCST90202001-GCST90203000/GCST90202094	36635386
GCST90203213	1-stearoyl-gpc (18:0) levels	1-stearoyl-GPC (18:0) measurement	107 South Asian	http://ftp.ebi.ac.uk/pub/databases/gwas/summary_statistics/GCST90203001-GCST90204000/GCST90203213	36635386
GCST90202166	1-stearoyl-gpc (18:0) levels	1-stearoyl-GPC (18:0) measurement	103 East Asian	http://ftp.ebi.ac.uk/pub/databases/gwas/summary_statistics/GCST90202001-GCST90203000/GCST90202166	36635386
GCST90199732	1-stearoyl-gpc (18:0) levels	1-stearoyl-GPC (18:0) measurement	8240 European	http://ftp.ebi.ac.uk/pub/databases/gwas/summary_statistics/GCST90199001-GCST90200000/GCST90199732	36635386
GCST90201140	1-stearoyl-gpc (18:0) levels	1-stearoyl-GPC (18:0) measurement	59 African unspecified	http://ftp.ebi.ac.uk/pub/databases/gwas/summary_statistics/GCST90201001-GCST90202000/GCST90201140	36635386
GCST90203242	1-stearoyl-GPE (18:0) levels	1-stearoyl-GPE (18:0) measurement	108 South Asian	http://ftp.ebi.ac.uk/pub/databases/gwas/summary_statistics/GCST90203001-GCST90204000/GCST90203242	36635386
GCST90202211	1-stearoyl-GPE (18:0) levels	1-stearoyl-GPE (18:0) measurement	103 East Asian	http://ftp.ebi.ac.uk/pub/databases/gwas/summary_statistics/GCST90202001-GCST90203000/GCST90202211	36635386
GCST90199772	1-stearoyl-GPE (18:0) levels	1-stearoyl-GPE (18:0) measurement	8270 European	http://ftp.ebi.ac.uk/pub/databases/gwas/summary_statistics/GCST90199001-GCST90200000/GCST90199772	36635386
GCST90201182	1-stearoyl-GPE (18:0) levels	1-stearoyl-GPE (18:0) measurement	60 African unspecified	http://ftp.ebi.ac.uk/pub/databases/gwas/summary_statistics/GCST90201001-GCST90202000/GCST90201182	36635386
GCST90203234	1-stearoyl-GPG (18:0) levels	1-stearoyl-GPG (18:0) measurement	80 South Asian	http://ftp.ebi.ac.uk/pub/databases/gwas/summary_statistics/GCST90203001-GCST90204000/GCST90203234	36635386
GCST90202209	1-stearoyl-GPG (18:0) levels	1-stearoyl-GPG (18:0) measurement	92 East Asian	http://ftp.ebi.ac.uk/pub/databases/gwas/summary_statistics/GCST90202001-GCST90203000/GCST90202209	36635386
GCST90199780	1-stearoyl-GPG (18:0) levels	1-stearoyl-GPG (18:0) measurement	6806 European	http://ftp.ebi.ac.uk/pub/databases/gwas/summary_statistics/GCST90199001-GCST90200000/GCST90199780	36635386
GCST90201181	1-stearoyl-GPG (18:0) levels	1-stearoyl-GPG (18:0) measurement	54 African unspecified	http://ftp.ebi.ac.uk/pub/databases/gwas/summary_statistics/GCST90201001-GCST90202000/GCST90201181	36635386
GCST90201051	1-stearoyl-GPI (18:0) levels	1-stearoyl-GPI (18:0) measurement	60 African unspecified	http://ftp.ebi.ac.uk/pub/databases/gwas/summary_statistics/GCST90201001-GCST90202000/GCST90201051	36635386
GCST90199659	1-stearoyl-GPI (18:0) levels	1-stearoyl-GPI (18:0) measurement	8260 European	http://ftp.ebi.ac.uk/pub/databases/gwas/summary_statistics/GCST90199001-GCST90200000/GCST90199659	36635386
GCST90203118	1-stearoyl-GPI (18:0) levels	1-stearoyl-GPI (18:0) measurement	107 South Asian	http://ftp.ebi.ac.uk/pub/databases/gwas/summary_statistics/GCST90203001-GCST90204000/GCST90203118	36635386
GCST90202086	1-stearoyl-GPI (18:0) levels	1-stearoyl-GPI (18:0) measurement	104 East Asian	http://ftp.ebi.ac.uk/pub/databases/gwas/summary_statistics/GCST90202001-GCST90203000/GCST90202086	36635386
GCST90201606	2,2'-Methylenebis(6-tert-butyl-p-cresol) levels	blood 2,2'-Methylenebis(6-tert-butyl-p-cresol) measurement	54 African unspecified	http://ftp.ebi.ac.uk/pub/databases/gwas/summary_statistics/GCST90201001-GCST90202000/GCST90201606	36635386
GCST90202635	2,2'-Methylenebis(6-tert-butyl-p-cresol) levels	blood 2,2'-Methylenebis(6-tert-butyl-p-cresol) measurement	95 East Asian	http://ftp.ebi.ac.uk/pub/databases/gwas/summary_statistics/GCST90202001-GCST90203000/GCST90202635	36635386
GCST90200196	2,2'-Methylenebis(6-tert-butyl-p-cresol) levels	blood 2,2'-Methylenebis(6-tert-butyl-p-cresol) measurement	7397 European	http://ftp.ebi.ac.uk/pub/databases/gwas/summary_statistics/GCST90200001-GCST90201000/GCST90200196	36635386
GCST90203627	2,2'-Methylenebis(6-tert-butyl-p-cresol) levels	blood 2,2'-Methylenebis(6-tert-butyl-p-cresol) measurement	96 South Asian	http://ftp.ebi.ac.uk/pub/databases/gwas/summary_statistics/GCST90203001-GCST90204000/GCST90203627	36635386
GCST90201511	2,3-dihydroxy-2-methylbutyrate levels	blood 2,3-dihydroxy-2-methylbutyrate measurement	59 African unspecified	http://ftp.ebi.ac.uk/pub/databases/gwas/summary_statistics/GCST90201001-GCST90202000/GCST90201511	36635386
GCST90203534	2,3-dihydroxy-2-methylbutyrate levels	blood 2,3-dihydroxy-2-methylbutyrate measurement	105 South Asian	http://ftp.ebi.ac.uk/pub/databases/gwas/summary_statistics/GCST90203001-GCST90204000/GCST90203534	36635386
GCST90202539	2,3-dihydroxy-2-methylbutyrate levels	blood 2,3-dihydroxy-2-methylbutyrate measurement	98 East Asian	http://ftp.ebi.ac.uk/pub/databases/gwas/summary_statistics/GCST90202001-GCST90203000/GCST90202539	36635386
GCST90200112	2,3-dihydroxy-2-methylbutyrate levels	blood 2,3-dihydroxy-2-methylbutyrate measurement	8018 European	http://ftp.ebi.ac.uk/pub/databases/gwas/summary_statistics/GCST90200001-GCST90201000/GCST90200112	36635386
GCST90201633	2,3-dihydroxy-5-methylthio-4-pentenoate (dmtpa) levels	2,3-dihydroxy-5-methylthio-4-pentenoate (DMTPA) measurement	60 African unspecified	http://ftp.ebi.ac.uk/pub/databases/gwas/summary_statistics/GCST90201001-GCST90202000/GCST90201633	36635386
GCST90202668	2,3-dihydroxy-5-methylthio-4-pentenoate (dmtpa) levels	2,3-dihydroxy-5-methylthio-4-pentenoate (DMTPA) measurement	102 East Asian	http://ftp.ebi.ac.uk/pub/databases/gwas/summary_statistics/GCST90202001-GCST90203000/GCST90202668	36635386
GCST90200233	2,3-dihydroxy-5-methylthio-4-pentenoate (dmtpa) levels	2,3-dihydroxy-5-methylthio-4-pentenoate (DMTPA) measurement	8225 European	http://ftp.ebi.ac.uk/pub/databases/gwas/summary_statistics/GCST90200001-GCST90201000/GCST90200233	36635386
GCST90203667	2,3-dihydroxy-5-methylthio-4-pentenoate (dmtpa) levels	2,3-dihydroxy-5-methylthio-4-pentenoate (DMTPA) measurement	107 South Asian	http://ftp.ebi.ac.uk/pub/databases/gwas/summary_statistics/GCST90203001-GCST90204000/GCST90203667	36635386
GCST90201285	2,3-dihydroxyisovalerate levels	2,3-dihydroxyisovalerate measurement	59 African unspecified	http://ftp.ebi.ac.uk/pub/databases/gwas/summary_statistics/GCST90201001-GCST90202000/GCST90201285	36635386
GCST90202329	2,3-dihydroxyisovalerate levels	2,3-dihydroxyisovalerate measurement	104 East Asian	http://ftp.ebi.ac.uk/pub/databases/gwas/summary_statistics/GCST90202001-GCST90203000/GCST90202329	36635386
GCST90199884	2,3-dihydroxyisovalerate levels	2,3-dihydroxyisovalerate measurement	8268 European	http://ftp.ebi.ac.uk/pub/databases/gwas/summary_statistics/GCST90199001-GCST90200000/GCST90199884	36635386
GCST90203350	2,3-dihydroxyisovalerate levels	2,3-dihydroxyisovalerate measurement	107 South Asian	http://ftp.ebi.ac.uk/pub/databases/gwas/summary_statistics/GCST90203001-GCST90204000/GCST90203350	36635386
GCST90201077	2,3-dihydroxypyridine levels	blood 2,3-dihydroxypyridine measurement	35 African unspecified	http://ftp.ebi.ac.uk/pub/databases/gwas/summary_statistics/GCST90201001-GCST90202000/GCST90201077	36635386
GCST90199679	2,3-dihydroxypyridine levels	blood 2,3-dihydroxypyridine measurement	6496 European	http://ftp.ebi.ac.uk/pub/databases/gwas/summary_statistics/GCST90199001-GCST90200000/GCST90199679	36635386
GCST90203140	2,3-dihydroxypyridine levels	blood 2,3-dihydroxypyridine measurement	65 South Asian	http://ftp.ebi.ac.uk/pub/databases/gwas/summary_statistics/GCST90203001-GCST90204000/GCST90203140	36635386
GCST90202106	2,3-dihydroxypyridine levels	blood 2,3-dihydroxypyridine measurement	69 East Asian	http://ftp.ebi.ac.uk/pub/databases/gwas/summary_statistics/GCST90202001-GCST90203000/GCST90202106	36635386
GCST90202699	2,4-di-tert-butylphenol levels	blood 2,4-di-tert-butylphenol measurement	104 East Asian	http://ftp.ebi.ac.uk/pub/databases/gwas/summary_statistics/GCST90202001-GCST90203000/GCST90202699	36635386
GCST90201657	2,4-di-tert-butylphenol levels	blood 2,4-di-tert-butylphenol measurement	60 African unspecified	http://ftp.ebi.ac.uk/pub/databases/gwas/summary_statistics/GCST90201001-GCST90202000/GCST90201657	36635386
GCST90200276	2,4-di-tert-butylphenol levels	blood 2,4-di-tert-butylphenol measurement	8251 European	http://ftp.ebi.ac.uk/pub/databases/gwas/summary_statistics/GCST90200001-GCST90201000/GCST90200276	36635386
GCST90203695	2,4-di-tert-butylphenol levels	blood 2,4-di-tert-butylphenol measurement	108 South Asian	http://ftp.ebi.ac.uk/pub/databases/gwas/summary_statistics/GCST90203001-GCST90204000/GCST90203695	36635386
GCST90202663	2,6-dihydroxybenzoic acid levels	2,6-dihydroxybenzoic acid measurement	103 East Asian	http://ftp.ebi.ac.uk/pub/databases/gwas/summary_statistics/GCST90202001-GCST90203000/GCST90202663	36635386
GCST90201642	2,6-dihydroxybenzoic acid levels	2,6-dihydroxybenzoic acid measurement	60 African unspecified	http://ftp.ebi.ac.uk/pub/databases/gwas/summary_statistics/GCST90201001-GCST90202000/GCST90201642	36635386
GCST90200229	2,6-dihydroxybenzoic acid levels	2,6-dihydroxybenzoic acid measurement	8269 European	http://ftp.ebi.ac.uk/pub/databases/gwas/summary_statistics/GCST90200001-GCST90201000/GCST90200229	36635386
GCST90203669	2,6-dihydroxybenzoic acid levels	2,6-dihydroxybenzoic acid measurement	107 South Asian	http://ftp.ebi.ac.uk/pub/databases/gwas/summary_statistics/GCST90203001-GCST90204000/GCST90203669	36635386
GCST90203318	21-hydroxypregnenolone disulfate levels	21-hydroxypregnenolone disulfate measurement	107 South Asian	http://ftp.ebi.ac.uk/pub/databases/gwas/summary_statistics/GCST90203001-GCST90204000/GCST90203318	36635386
GCST90202292	21-hydroxypregnenolone disulfate levels	21-hydroxypregnenolone disulfate measurement	101 East Asian	http://ftp.ebi.ac.uk/pub/databases/gwas/summary_statistics/GCST90202001-GCST90203000/GCST90202292	36635386
GCST90199849	21-hydroxypregnenolone disulfate levels	21-hydroxypregnenolone disulfate measurement	8132 European	http://ftp.ebi.ac.uk/pub/databases/gwas/summary_statistics/GCST90199001-GCST90200000/GCST90199849	36635386
GCST90201255	21-hydroxypregnenolone disulfate levels	21-hydroxypregnenolone disulfate measurement	59 African unspecified	http://ftp.ebi.ac.uk/pub/databases/gwas/summary_statistics/GCST90201001-GCST90202000/GCST90201255	36635386
GCST90199981	2-acetamidophenol sulfate levels	2-acetamidophenol sulfate measurement	6984 European	http://ftp.ebi.ac.uk/pub/databases/gwas/summary_statistics/GCST90199001-GCST90200000/GCST90199981	36635386
GCST90201406	2-acetamidophenol sulfate levels	2-acetamidophenol sulfate measurement	54 African unspecified	http://ftp.ebi.ac.uk/pub/databases/gwas/summary_statistics/GCST90201001-GCST90202000/GCST90201406	36635386
GCST90203435	2-acetamidophenol sulfate levels	2-acetamidophenol sulfate measurement	89 South Asian	http://ftp.ebi.ac.uk/pub/databases/gwas/summary_statistics/GCST90203001-GCST90204000/GCST90203435	36635386
GCST90202437	2-acetamidophenol sulfate levels	2-acetamidophenol sulfate measurement	75 East Asian	http://ftp.ebi.ac.uk/pub/databases/gwas/summary_statistics/GCST90202001-GCST90203000/GCST90202437	36635386
GCST90202745	2-aminobutyrate levels	2-aminobutyrate measurement	103 East Asian	http://ftp.ebi.ac.uk/pub/databases/gwas/summary_statistics/GCST90202001-GCST90203000/GCST90202745	36635386
GCST90203740	2-aminobutyrate levels	2-aminobutyrate measurement	108 South Asian	http://ftp.ebi.ac.uk/pub/databases/gwas/summary_statistics/GCST90203001-GCST90204000/GCST90203740	36635386
GCST90201695	2-aminobutyrate levels	2-aminobutyrate measurement	59 African unspecified	http://ftp.ebi.ac.uk/pub/databases/gwas/summary_statistics/GCST90201001-GCST90202000/GCST90201695	36635386
GCST90200305	2-aminobutyrate levels	2-aminobutyrate measurement	8242 European	http://ftp.ebi.ac.uk/pub/databases/gwas/summary_statistics/GCST90200001-GCST90201000/GCST90200305	36635386
GCST90199952	2-aminoheptanoate levels	2-aminoheptanoate measurement	8238 European	http://ftp.ebi.ac.uk/pub/databases/gwas/summary_statistics/GCST90199001-GCST90200000/GCST90199952	36635386
GCST90203403	2-aminoheptanoate levels	2-aminoheptanoate measurement	108 South Asian	http://ftp.ebi.ac.uk/pub/databases/gwas/summary_statistics/GCST90203001-GCST90204000/GCST90203403	36635386
GCST90202399	2-aminoheptanoate levels	2-aminoheptanoate measurement	103 East Asian	http://ftp.ebi.ac.uk/pub/databases/gwas/summary_statistics/GCST90202001-GCST90203000/GCST90202399	36635386
GCST90201378	2-aminoheptanoate levels	2-aminoheptanoate measurement	60 African unspecified	http://ftp.ebi.ac.uk/pub/databases/gwas/summary_statistics/GCST90201001-GCST90202000/GCST90201378	36635386
GCST90199937	2-aminooctanoate levels	2-aminooctanoate measurement	8178 European	http://ftp.ebi.ac.uk/pub/databases/gwas/summary_statistics/GCST90199001-GCST90200000/GCST90199937	36635386
GCST90203375	2-aminooctanoate levels	2-aminooctanoate measurement	108 South Asian	http://ftp.ebi.ac.uk/pub/databases/gwas/summary_statistics/GCST90203001-GCST90204000/GCST90203375	36635386
GCST90202374	2-aminooctanoate levels	2-aminooctanoate measurement	103 East Asian	http://ftp.ebi.ac.uk/pub/databases/gwas/summary_statistics/GCST90202001-GCST90203000/GCST90202374	36635386
GCST90201349	2-aminooctanoate levels	2-aminooctanoate measurement	58 African unspecified	http://ftp.ebi.ac.uk/pub/databases/gwas/summary_statistics/GCST90201001-GCST90202000/GCST90201349	36635386
GCST90199950	2-aminophenol sulfate levels	2-aminophenol sulfate measurement	8264 European	http://ftp.ebi.ac.uk/pub/databases/gwas/summary_statistics/GCST90199001-GCST90200000/GCST90199950	36635386
GCST90203396	2-aminophenol sulfate levels	2-aminophenol sulfate measurement	108 South Asian	http://ftp.ebi.ac.uk/pub/databases/gwas/summary_statistics/GCST90203001-GCST90204000/GCST90203396	36635386
GCST90201348	2-aminophenol sulfate levels	2-aminophenol sulfate measurement	60 African unspecified	http://ftp.ebi.ac.uk/pub/databases/gwas/summary_statistics/GCST90201001-GCST90202000/GCST90201348	36635386
GCST90202406	2-aminophenol sulfate levels	2-aminophenol sulfate measurement	103 East Asian	http://ftp.ebi.ac.uk/pub/databases/gwas/summary_statistics/GCST90202001-GCST90203000/GCST90202406	36635386
GCST90201558	2-butenoylglycine levels	2-butenoylglycine measurement	40 African unspecified	http://ftp.ebi.ac.uk/pub/databases/gwas/summary_statistics/GCST90201001-GCST90202000/GCST90201558	36635386
GCST90203588	2-butenoylglycine levels	2-butenoylglycine measurement	84 South Asian	http://ftp.ebi.ac.uk/pub/databases/gwas/summary_statistics/GCST90203001-GCST90204000/GCST90203588	36635386
GCST90202590	2-butenoylglycine levels	2-butenoylglycine measurement	65 East Asian	http://ftp.ebi.ac.uk/pub/databases/gwas/summary_statistics/GCST90202001-GCST90203000/GCST90202590	36635386
GCST90200152	2-butenoylglycine levels	2-butenoylglycine measurement	6253 European	http://ftp.ebi.ac.uk/pub/databases/gwas/summary_statistics/GCST90200001-GCST90201000/GCST90200152	36635386
GCST90203848	2'-deoxyuridine levels	2'-deoxyuridine measurement	104 South Asian	http://ftp.ebi.ac.uk/pub/databases/gwas/summary_statistics/GCST90203001-GCST90204000/GCST90203848	36635386
GCST90200413	2'-deoxyuridine levels	2'-deoxyuridine measurement	7915 European	http://ftp.ebi.ac.uk/pub/databases/gwas/summary_statistics/GCST90200001-GCST90201000/GCST90200413	36635386
GCST90202847	2'-deoxyuridine levels	2'-deoxyuridine measurement	100 East Asian	http://ftp.ebi.ac.uk/pub/databases/gwas/summary_statistics/GCST90202001-GCST90203000/GCST90202847	36635386
GCST90200906	2'-deoxyuridine to cytidine ratio	metabolite ratio	7410 European	http://ftp.ebi.ac.uk/pub/databases/gwas/summary_statistics/GCST90200001-GCST90201000/GCST90200906	36635386
GCST90201562	2-furoylcarnitine levels	metabolite measurement	40 African unspecified	http://ftp.ebi.ac.uk/pub/databases/gwas/summary_statistics/GCST90201001-GCST90202000/GCST90201562	36635386
GCST90203582	2-furoylcarnitine levels	metabolite measurement	66 South Asian	http://ftp.ebi.ac.uk/pub/databases/gwas/summary_statistics/GCST90203001-GCST90204000/GCST90203582	36635386
GCST90202589	2-furoylcarnitine levels	metabolite measurement	67 East Asian	http://ftp.ebi.ac.uk/pub/databases/gwas/summary_statistics/GCST90202001-GCST90203000/GCST90202589	36635386
GCST90200155	2-furoylcarnitine levels	metabolite measurement	6448 European	http://ftp.ebi.ac.uk/pub/databases/gwas/summary_statistics/GCST90200001-GCST90201000/GCST90200155	36635386
GCST90202233	2-hydroxy-3-methylvalerate levels	2-hydroxy-3-methylvalerate measurement	104 East Asian	http://ftp.ebi.ac.uk/pub/databases/gwas/summary_statistics/GCST90202001-GCST90203000/GCST90202233	36635386
GCST90199786	2-hydroxy-3-methylvalerate levels	2-hydroxy-3-methylvalerate measurement	8246 European	http://ftp.ebi.ac.uk/pub/databases/gwas/summary_statistics/GCST90199001-GCST90200000/GCST90199786	36635386
GCST90201194	2-hydroxy-3-methylvalerate levels	2-hydroxy-3-methylvalerate measurement	60 African unspecified	http://ftp.ebi.ac.uk/pub/databases/gwas/summary_statistics/GCST90201001-GCST90202000/GCST90201194	36635386
GCST90202671	2-hydroxy-4-(methylthio)butanoic acid levels	2-hydroxy-4-(methylthio)butanoic acid measurement	104 East Asian	http://ftp.ebi.ac.uk/pub/databases/gwas/summary_statistics/GCST90202001-GCST90203000/GCST90202671	36635386
GCST90201651	2-hydroxy-4-(methylthio)butanoic acid levels	2-hydroxy-4-(methylthio)butanoic acid measurement	60 African unspecified	http://ftp.ebi.ac.uk/pub/databases/gwas/summary_statistics/GCST90201001-GCST90202000/GCST90201651	36635386
GCST90200258	2-hydroxy-4-(methylthio)butanoic acid levels	2-hydroxy-4-(methylthio)butanoic acid measurement	8255 European	http://ftp.ebi.ac.uk/pub/databases/gwas/summary_statistics/GCST90200001-GCST90201000/GCST90200258	36635386
GCST90203685	2-hydroxy-4-(methylthio)butanoic acid levels	2-hydroxy-4-(methylthio)butanoic acid measurement	107 South Asian	http://ftp.ebi.ac.uk/pub/databases/gwas/summary_statistics/GCST90203001-GCST90204000/GCST90203685	36635386
GCST90201565	2-hydroxyarachidate levels	2-hydroxyarachidate measurement	60 African unspecified	http://ftp.ebi.ac.uk/pub/databases/gwas/summary_statistics/GCST90201001-GCST90202000/GCST90201565	36635386
GCST90203593	2-hydroxyarachidate levels	2-hydroxyarachidate measurement	107 South Asian	http://ftp.ebi.ac.uk/pub/databases/gwas/summary_statistics/GCST90203001-GCST90204000/GCST90203593	36635386
GCST90202598	2-hydroxyarachidate levels	2-hydroxyarachidate measurement	104 East Asian	http://ftp.ebi.ac.uk/pub/databases/gwas/summary_statistics/GCST90202001-GCST90203000/GCST90202598	36635386
GCST90200161	2-hydroxyarachidate levels	2-hydroxyarachidate measurement	8170 European	http://ftp.ebi.ac.uk/pub/databases/gwas/summary_statistics/GCST90200001-GCST90201000/GCST90200161	36635386
GCST90200032	2-hydroxybutyrate/2-hydroxyisobutyrate levels	2-hydroxyisobutyrate measurement	8215 European	http://ftp.ebi.ac.uk/pub/databases/gwas/summary_statistics/GCST90200001-GCST90201000/GCST90200032	36635386
GCST90201461	2-hydroxybutyrate/2-hydroxyisobutyrate levels	2-hydroxyisobutyrate measurement	60 African unspecified	http://ftp.ebi.ac.uk/pub/databases/gwas/summary_statistics/GCST90201001-GCST90202000/GCST90201461	36635386
GCST90203483	2-hydroxybutyrate/2-hydroxyisobutyrate levels	2-hydroxyisobutyrate measurement	107 South Asian	http://ftp.ebi.ac.uk/pub/databases/gwas/summary_statistics/GCST90203001-GCST90204000/GCST90203483	36635386
GCST90202481	2-hydroxybutyrate/2-hydroxyisobutyrate levels	2-hydroxyisobutyrate measurement	101 East Asian	http://ftp.ebi.ac.uk/pub/databases/gwas/summary_statistics/GCST90202001-GCST90203000/GCST90202481	36635386
GCST90201339	2-hydroxydecanoate levels	2-hydroxydecanoate measurement	60 African unspecified	http://ftp.ebi.ac.uk/pub/databases/gwas/summary_statistics/GCST90201001-GCST90202000/GCST90201339	36635386
GCST90199934	2-hydroxydecanoate levels	2-hydroxydecanoate measurement	8267 European	http://ftp.ebi.ac.uk/pub/databases/gwas/summary_statistics/GCST90199001-GCST90200000/GCST90199934	36635386
GCST90203376	2-hydroxydecanoate levels	2-hydroxydecanoate measurement	108 South Asian	http://ftp.ebi.ac.uk/pub/databases/gwas/summary_statistics/GCST90203001-GCST90204000/GCST90203376	36635386
GCST90202383	2-hydroxydecanoate levels	2-hydroxydecanoate measurement	104 East Asian	http://ftp.ebi.ac.uk/pub/databases/gwas/summary_statistics/GCST90202001-GCST90203000/GCST90202383	36635386
GCST90201279	2-hydroxyglutarate levels	2-hydroxyglutarate measurement	56 African unspecified	http://ftp.ebi.ac.uk/pub/databases/gwas/summary_statistics/GCST90201001-GCST90202000/GCST90201279	36635386
GCST90202305	2-hydroxyglutarate levels	2-hydroxyglutarate measurement	97 East Asian	http://ftp.ebi.ac.uk/pub/databases/gwas/summary_statistics/GCST90202001-GCST90203000/GCST90202305	36635386
GCST90203305	2-hydroxyglutarate levels	2-hydroxyglutarate measurement	102 South Asian	http://ftp.ebi.ac.uk/pub/databases/gwas/summary_statistics/GCST90203001-GCST90204000/GCST90203305	36635386
GCST90199865	2-hydroxyglutarate levels	2-hydroxyglutarate measurement	7769 European	http://ftp.ebi.ac.uk/pub/databases/gwas/summary_statistics/GCST90199001-GCST90200000/GCST90199865	36635386
GCST90202779	2-hydroxyhippurate (salicylurate) levels	salicylurate measurement	101 East Asian	http://ftp.ebi.ac.uk/pub/databases/gwas/summary_statistics/GCST90202001-GCST90203000/GCST90202779	36635386
GCST90203783	2-hydroxyhippurate (salicylurate) levels	salicylurate measurement	106 South Asian	http://ftp.ebi.ac.uk/pub/databases/gwas/summary_statistics/GCST90203001-GCST90204000/GCST90203783	36635386
GCST90200347	2-hydroxyhippurate (salicylurate) levels	salicylurate measurement	8244 European	http://ftp.ebi.ac.uk/pub/databases/gwas/summary_statistics/GCST90200001-GCST90201000/GCST90200347	36635386
GCST90201732	2-hydroxyhippurate (salicylurate) levels	salicylurate measurement	58 African unspecified	http://ftp.ebi.ac.uk/pub/databases/gwas/summary_statistics/GCST90201001-GCST90202000/GCST90201732	36635386
GCST90201062	2-hydroxyoctanoate levels	2-hydroxyoctanoate measurement	59 African unspecified	http://ftp.ebi.ac.uk/pub/databases/gwas/summary_statistics/GCST90201001-GCST90202000/GCST90201062	36635386
GCST90199681	2-hydroxyoctanoate levels	2-hydroxyoctanoate measurement	8224 European	http://ftp.ebi.ac.uk/pub/databases/gwas/summary_statistics/GCST90199001-GCST90200000/GCST90199681	36635386
GCST90203133	2-hydroxyoctanoate levels	2-hydroxyoctanoate measurement	108 South Asian	http://ftp.ebi.ac.uk/pub/databases/gwas/summary_statistics/GCST90203001-GCST90204000/GCST90203133	36635386
GCST90202092	2-hydroxyoctanoate levels	2-hydroxyoctanoate measurement	104 East Asian	http://ftp.ebi.ac.uk/pub/databases/gwas/summary_statistics/GCST90202001-GCST90203000/GCST90202092	36635386
GCST90203262	2-hydroxypalmitate levels	2-hydroxypalmitate measurement	107 South Asian	http://ftp.ebi.ac.uk/pub/databases/gwas/summary_statistics/GCST90203001-GCST90204000/GCST90203262	36635386
GCST90202240	2-hydroxypalmitate levels	2-hydroxypalmitate measurement	103 East Asian	http://ftp.ebi.ac.uk/pub/databases/gwas/summary_statistics/GCST90202001-GCST90203000/GCST90202240	36635386
GCST90199795	2-hydroxypalmitate levels	2-hydroxypalmitate measurement	8247 European	http://ftp.ebi.ac.uk/pub/databases/gwas/summary_statistics/GCST90199001-GCST90200000/GCST90199795	36635386
GCST90201200	2-hydroxypalmitate levels	2-hydroxypalmitate measurement	60 African unspecified	http://ftp.ebi.ac.uk/pub/databases/gwas/summary_statistics/GCST90201001-GCST90202000/GCST90201200	36635386
GCST90202792	2-hydroxyphenylacetate levels	2-hydroxyphenylacetate measurement	92 East Asian	http://ftp.ebi.ac.uk/pub/databases/gwas/summary_statistics/GCST90202001-GCST90203000/GCST90202792	36635386
GCST90203789	2-hydroxyphenylacetate levels	2-hydroxyphenylacetate measurement	102 South Asian	http://ftp.ebi.ac.uk/pub/databases/gwas/summary_statistics/GCST90203001-GCST90204000/GCST90203789	36635386
GCST90200369	2-hydroxyphenylacetate levels	2-hydroxyphenylacetate measurement	7564 European	http://ftp.ebi.ac.uk/pub/databases/gwas/summary_statistics/GCST90200001-GCST90201000/GCST90200369	36635386
GCST90201754	2-hydroxyphenylacetate levels	2-hydroxyphenylacetate measurement	55 African unspecified	http://ftp.ebi.ac.uk/pub/databases/gwas/summary_statistics/GCST90201001-GCST90202000/GCST90201754	36635386
GCST90201594	2-hydroxysebacate levels	2-hydroxysebacate measurement	55 African unspecified	http://ftp.ebi.ac.uk/pub/databases/gwas/summary_statistics/GCST90201001-GCST90202000/GCST90201594	36635386
GCST90202638	2-hydroxysebacate levels	2-hydroxysebacate measurement	96 East Asian	http://ftp.ebi.ac.uk/pub/databases/gwas/summary_statistics/GCST90202001-GCST90203000/GCST90202638	36635386
GCST90200198	2-hydroxysebacate levels	2-hydroxysebacate measurement	7865 European	http://ftp.ebi.ac.uk/pub/databases/gwas/summary_statistics/GCST90200001-GCST90201000/GCST90200198	36635386
GCST90203625	2-hydroxysebacate levels	2-hydroxysebacate measurement	102 South Asian	http://ftp.ebi.ac.uk/pub/databases/gwas/summary_statistics/GCST90203001-GCST90204000/GCST90203625	36635386
GCST90202761	2-hydroxystearate levels	2-hydroxystearate measurement	104 East Asian	http://ftp.ebi.ac.uk/pub/databases/gwas/summary_statistics/GCST90202001-GCST90203000/GCST90202761	36635386
GCST90200312	2-hydroxystearate levels	2-hydroxystearate measurement	8241 European	http://ftp.ebi.ac.uk/pub/databases/gwas/summary_statistics/GCST90200001-GCST90201000/GCST90200312	36635386
GCST90203754	2-hydroxystearate levels	2-hydroxystearate measurement	107 South Asian	http://ftp.ebi.ac.uk/pub/databases/gwas/summary_statistics/GCST90203001-GCST90204000/GCST90203754	36635386
GCST90201718	2-hydroxystearate levels	2-hydroxystearate measurement	60 African unspecified	http://ftp.ebi.ac.uk/pub/databases/gwas/summary_statistics/GCST90201001-GCST90202000/GCST90201718	36635386
GCST90201608	2-ketocaprylate levels	2-ketocaprylate measurement	60 African unspecified	http://ftp.ebi.ac.uk/pub/databases/gwas/summary_statistics/GCST90201001-GCST90202000/GCST90201608	36635386
GCST90202661	2-ketocaprylate levels	2-ketocaprylate measurement	104 East Asian	http://ftp.ebi.ac.uk/pub/databases/gwas/summary_statistics/GCST90202001-GCST90203000/GCST90202661	36635386
GCST90200224	2-ketocaprylate levels	2-ketocaprylate measurement	8240 European	http://ftp.ebi.ac.uk/pub/databases/gwas/summary_statistics/GCST90200001-GCST90201000/GCST90200224	36635386
GCST90203661	2-ketocaprylate levels	2-ketocaprylate measurement	108 South Asian	http://ftp.ebi.ac.uk/pub/databases/gwas/summary_statistics/GCST90203001-GCST90204000/GCST90203661	36635386
GCST90201082	2-linoleoylglycerol (18:2) levels	2-linoleoylglycerol (18:2) measurement	47 African unspecified	http://ftp.ebi.ac.uk/pub/databases/gwas/summary_statistics/GCST90201001-GCST90202000/GCST90201082	36635386
GCST90199685	2-linoleoylglycerol (18:2) levels	2-linoleoylglycerol (18:2) measurement	6378 European	http://ftp.ebi.ac.uk/pub/databases/gwas/summary_statistics/GCST90199001-GCST90200000/GCST90199685	36635386
GCST90203143	2-linoleoylglycerol (18:2) levels	2-linoleoylglycerol (18:2) measurement	86 South Asian	http://ftp.ebi.ac.uk/pub/databases/gwas/summary_statistics/GCST90203001-GCST90204000/GCST90203143	36635386
GCST90202112	2-linoleoylglycerol (18:2) levels	2-linoleoylglycerol (18:2) measurement	86 East Asian	http://ftp.ebi.ac.uk/pub/databases/gwas/summary_statistics/GCST90202001-GCST90203000/GCST90202112	36635386
GCST90202705	2-methoxyhydroquinone sulfate (1) levels	2-methoxyhydroquinone sulfate (1) measurement	89 East Asian	http://ftp.ebi.ac.uk/pub/databases/gwas/summary_statistics/GCST90202001-GCST90203000/GCST90202705	36635386
GCST90201666	2-methoxyhydroquinone sulfate (1) levels	2-methoxyhydroquinone sulfate (1) measurement	53 African unspecified	http://ftp.ebi.ac.uk/pub/databases/gwas/summary_statistics/GCST90201001-GCST90202000/GCST90201666	36635386
GCST90200270	2-methoxyhydroquinone sulfate (1) levels	2-methoxyhydroquinone sulfate (1) measurement	7487 European	http://ftp.ebi.ac.uk/pub/databases/gwas/summary_statistics/GCST90200001-GCST90201000/GCST90200270	36635386
GCST90203700	2-methoxyhydroquinone sulfate (1) levels	2-methoxyhydroquinone sulfate (1) measurement	92 South Asian	http://ftp.ebi.ac.uk/pub/databases/gwas/summary_statistics/GCST90203001-GCST90204000/GCST90203700	36635386
GCST90202695	2-methoxyhydroquinone sulfate (2) levels	2-methoxyhydroquinone sulfate (2) measurement	60 East Asian	http://ftp.ebi.ac.uk/pub/databases/gwas/summary_statistics/GCST90202001-GCST90203000/GCST90202695	36635386
GCST90201654	2-methoxyhydroquinone sulfate (2) levels	2-methoxyhydroquinone sulfate (2) measurement	35 African unspecified	http://ftp.ebi.ac.uk/pub/databases/gwas/summary_statistics/GCST90201001-GCST90202000/GCST90201654	36635386
GCST90200273	2-methoxyhydroquinone sulfate (2) levels	2-methoxyhydroquinone sulfate (2) measurement	5778 European	http://ftp.ebi.ac.uk/pub/databases/gwas/summary_statistics/GCST90200001-GCST90201000/GCST90200273	36635386
GCST90203698	2-methoxyhydroquinone sulfate (2) levels	2-methoxyhydroquinone sulfate (2) measurement	76 South Asian	http://ftp.ebi.ac.uk/pub/databases/gwas/summary_statistics/GCST90203001-GCST90204000/GCST90203698	36635386
GCST90199987	2-methoxyresorcinol sulfate levels	2-methoxyresorcinol sulfate measurement	5897 European	http://ftp.ebi.ac.uk/pub/databases/gwas/summary_statistics/GCST90199001-GCST90200000/GCST90199987	36635386
GCST90201403	2-methoxyresorcinol sulfate levels	2-methoxyresorcinol sulfate measurement	33 African unspecified	http://ftp.ebi.ac.uk/pub/databases/gwas/summary_statistics/GCST90201001-GCST90202000/GCST90201403	36635386
GCST90203433	2-methoxyresorcinol sulfate levels	2-methoxyresorcinol sulfate measurement	91 South Asian	http://ftp.ebi.ac.uk/pub/databases/gwas/summary_statistics/GCST90203001-GCST90204000/GCST90203433	36635386
GCST90202436	2-methoxyresorcinol sulfate levels	2-methoxyresorcinol sulfate measurement	77 East Asian	http://ftp.ebi.ac.uk/pub/databases/gwas/summary_statistics/GCST90202001-GCST90203000/GCST90202436	36635386
GCST90200087	2-methylserine levels	2-methylserine measurement	7722 European	http://ftp.ebi.ac.uk/pub/databases/gwas/summary_statistics/GCST90200001-GCST90201000/GCST90200087	36635386
GCST90201489	2-methylserine levels	2-methylserine measurement	58 African unspecified	http://ftp.ebi.ac.uk/pub/databases/gwas/summary_statistics/GCST90201001-GCST90202000/GCST90201489	36635386
GCST90203528	2-methylserine levels	2-methylserine measurement	104 South Asian	http://ftp.ebi.ac.uk/pub/databases/gwas/summary_statistics/GCST90203001-GCST90204000/GCST90203528	36635386
GCST90202508	2-methylserine levels	2-methylserine measurement	100 East Asian	http://ftp.ebi.ac.uk/pub/databases/gwas/summary_statistics/GCST90202001-GCST90203000/GCST90202508	36635386
GCST90201621	2-naphthol sulfate levels	2-naphthol sulfate measurement	59 African unspecified	http://ftp.ebi.ac.uk/pub/databases/gwas/summary_statistics/GCST90201001-GCST90202000/GCST90201621	36635386
GCST90200213	2-naphthol sulfate levels	2-naphthol sulfate measurement	7673 European	http://ftp.ebi.ac.uk/pub/databases/gwas/summary_statistics/GCST90200001-GCST90201000/GCST90200213	36635386
GCST90203648	2-naphthol sulfate levels	2-naphthol sulfate measurement	103 South Asian	http://ftp.ebi.ac.uk/pub/databases/gwas/summary_statistics/GCST90203001-GCST90204000/GCST90203648	36635386
GCST90201321	2-o-methylascorbic acid levels	2-O-methylascorbic acid measurement	60 African unspecified	http://ftp.ebi.ac.uk/pub/databases/gwas/summary_statistics/GCST90201001-GCST90202000/GCST90201321	36635386
GCST90202360	2-o-methylascorbic acid levels	2-O-methylascorbic acid measurement	103 East Asian	http://ftp.ebi.ac.uk/pub/databases/gwas/summary_statistics/GCST90202001-GCST90203000/GCST90202360	36635386
GCST90199908	2-o-methylascorbic acid levels	2-O-methylascorbic acid measurement	8219 European	http://ftp.ebi.ac.uk/pub/databases/gwas/summary_statistics/GCST90199001-GCST90200000/GCST90199908	36635386
GCST90203357	2-o-methylascorbic acid levels	2-O-methylascorbic acid measurement	107 South Asian	http://ftp.ebi.ac.uk/pub/databases/gwas/summary_statistics/GCST90203001-GCST90204000/GCST90203357	36635386
GCST90200694	2'-o-methylcytidine levels	2'-O-methylcytidine measurement	8122 European	http://ftp.ebi.ac.uk/pub/databases/gwas/summary_statistics/GCST90200001-GCST90201000/GCST90200694	36635386
GCST90201510	2'-o-methylcytidine levels	2'-O-methylcytidine measurement	59 African unspecified	http://ftp.ebi.ac.uk/pub/databases/gwas/summary_statistics/GCST90201001-GCST90202000/GCST90201510	36635386
GCST90203537	2'-o-methylcytidine levels	2'-O-methylcytidine measurement	108 South Asian	http://ftp.ebi.ac.uk/pub/databases/gwas/summary_statistics/GCST90203001-GCST90204000/GCST90203537	36635386
GCST90202532	2'-o-methylcytidine levels	2'-O-methylcytidine measurement	102 East Asian	http://ftp.ebi.ac.uk/pub/databases/gwas/summary_statistics/GCST90202001-GCST90203000/GCST90202532	36635386
GCST90200695	2'-o-methyluridine levels	2'-O-methyluridine measurement	7582 European	http://ftp.ebi.ac.uk/pub/databases/gwas/summary_statistics/GCST90200001-GCST90201000/GCST90200695	36635386
GCST90201512	2'-o-methyluridine levels	2'-O-methyluridine measurement	57 African unspecified	http://ftp.ebi.ac.uk/pub/databases/gwas/summary_statistics/GCST90201001-GCST90202000/GCST90201512	36635386
GCST90203535	2'-o-methyluridine levels	2'-O-methyluridine measurement	102 South Asian	http://ftp.ebi.ac.uk/pub/databases/gwas/summary_statistics/GCST90203001-GCST90204000/GCST90203535	36635386
GCST90202534	2'-o-methyluridine levels	2'-O-methyluridine measurement	94 East Asian	http://ftp.ebi.ac.uk/pub/databases/gwas/summary_statistics/GCST90202001-GCST90203000/GCST90202534	36635386
GCST90201318	2-oxoarginine levels	2-oxoarginine measurement	59 African unspecified	http://ftp.ebi.ac.uk/pub/databases/gwas/summary_statistics/GCST90201001-GCST90202000/GCST90201318	36635386
GCST90202326	2-oxoarginine levels	2-oxoarginine measurement	103 East Asian	http://ftp.ebi.ac.uk/pub/databases/gwas/summary_statistics/GCST90202001-GCST90203000/GCST90202326	36635386
GCST90199903	2-oxoarginine levels	2-oxoarginine measurement	8223 European	http://ftp.ebi.ac.uk/pub/databases/gwas/summary_statistics/GCST90199001-GCST90200000/GCST90199903	36635386
GCST90203345	2-oxoarginine levels	2-oxoarginine measurement	108 South Asian	http://ftp.ebi.ac.uk/pub/databases/gwas/summary_statistics/GCST90203001-GCST90204000/GCST90203345	36635386
GCST90203267	2-palmitoleoyl-GPC (16:1) levels	2-palmitoleoyl-GPC (16:1) measurement	86 South Asian	http://ftp.ebi.ac.uk/pub/databases/gwas/summary_statistics/GCST90203001-GCST90204000/GCST90203267	36635386
GCST90202244	2-palmitoleoyl-GPC (16:1) levels	2-palmitoleoyl-GPC (16:1) measurement	90 East Asian	http://ftp.ebi.ac.uk/pub/databases/gwas/summary_statistics/GCST90202001-GCST90203000/GCST90202244	36635386
GCST90199790	2-palmitoleoyl-GPC (16:1) levels	2-palmitoleoyl-GPC (16:1) measurement	6697 European	http://ftp.ebi.ac.uk/pub/databases/gwas/summary_statistics/GCST90199001-GCST90200000/GCST90199790	36635386
GCST90201193	2-palmitoleoyl-GPC (16:1) levels	2-palmitoleoyl-GPC (16:1) measurement	44 African unspecified	http://ftp.ebi.ac.uk/pub/databases/gwas/summary_statistics/GCST90201001-GCST90202000/GCST90201193	36635386
GCST90202232	2-palmitoyl-GPC (16:0) levels	2-palmitoyl-GPC (16:0) measurement	104 East Asian	http://ftp.ebi.ac.uk/pub/databases/gwas/summary_statistics/GCST90202001-GCST90203000/GCST90202232	36635386
GCST90199789	2-palmitoyl-GPC (16:0) levels	2-palmitoyl-GPC (16:0) measurement	8249 European	http://ftp.ebi.ac.uk/pub/databases/gwas/summary_statistics/GCST90199001-GCST90200000/GCST90199789	36635386
GCST90201195	2-palmitoyl-GPC (16:0) levels	2-palmitoyl-GPC (16:0) measurement	60 African unspecified	http://ftp.ebi.ac.uk/pub/databases/gwas/summary_statistics/GCST90201001-GCST90202000/GCST90201195	36635386
GCST90199943	2-piperidinone levels	2-piperidinone measurement	8225 European	http://ftp.ebi.ac.uk/pub/databases/gwas/summary_statistics/GCST90199001-GCST90200000/GCST90199943	36635386
GCST90203410	2-piperidinone levels	2-piperidinone measurement	107 South Asian	http://ftp.ebi.ac.uk/pub/databases/gwas/summary_statistics/GCST90203001-GCST90204000/GCST90203410	36635386
GCST90202386	2-piperidinone levels	2-piperidinone measurement	104 East Asian	http://ftp.ebi.ac.uk/pub/databases/gwas/summary_statistics/GCST90202001-GCST90203000/GCST90202386	36635386
GCST90201352	2-piperidinone levels	2-piperidinone measurement	60 African unspecified	http://ftp.ebi.ac.uk/pub/databases/gwas/summary_statistics/GCST90201001-GCST90202000/GCST90201352	36635386
GCST90201294	2R,3R-dihydroxybutyrate levels	2R,3R-dihydroxybutyrate measurement	58 African unspecified	http://ftp.ebi.ac.uk/pub/databases/gwas/summary_statistics/GCST90201001-GCST90202000/GCST90201294	36635386
GCST90202344	2R,3R-dihydroxybutyrate levels	2R,3R-dihydroxybutyrate measurement	104 East Asian	http://ftp.ebi.ac.uk/pub/databases/gwas/summary_statistics/GCST90202001-GCST90203000/GCST90202344	36635386
GCST90199889	2R,3R-dihydroxybutyrate levels	2R,3R-dihydroxybutyrate measurement	8223 European	http://ftp.ebi.ac.uk/pub/databases/gwas/summary_statistics/GCST90199001-GCST90200000/GCST90199889	36635386
GCST90203340	2R,3R-dihydroxybutyrate levels	2R,3R-dihydroxybutyrate measurement	106 South Asian	http://ftp.ebi.ac.uk/pub/databases/gwas/summary_statistics/GCST90203001-GCST90204000/GCST90203340	36635386
GCST90201288	2s,3R-dihydroxybutyrate levels	2s,3R-dihydroxybutyrate measurement	60 African unspecified	http://ftp.ebi.ac.uk/pub/databases/gwas/summary_statistics/GCST90201001-GCST90202000/GCST90201288	36635386
GCST90202331	2s,3R-dihydroxybutyrate levels	2s,3R-dihydroxybutyrate measurement	104 East Asian	http://ftp.ebi.ac.uk/pub/databases/gwas/summary_statistics/GCST90202001-GCST90203000/GCST90202331	36635386
GCST90199882	2s,3R-dihydroxybutyrate levels	2s,3R-dihydroxybutyrate measurement	8252 European	http://ftp.ebi.ac.uk/pub/databases/gwas/summary_statistics/GCST90199001-GCST90200000/GCST90199882	36635386
GCST90203333	2s,3R-dihydroxybutyrate levels	2s,3R-dihydroxybutyrate measurement	108 South Asian	http://ftp.ebi.ac.uk/pub/databases/gwas/summary_statistics/GCST90203001-GCST90204000/GCST90203333	36635386
GCST90201331	2-stearoyl-GPE (18:0) levels	2-stearoyl-GPE (18:0) measurement	58 African unspecified	http://ftp.ebi.ac.uk/pub/databases/gwas/summary_statistics/GCST90201001-GCST90202000/GCST90201331	36635386
GCST90199928	2-stearoyl-GPE (18:0) levels	2-stearoyl-GPE (18:0) measurement	8073 European	http://ftp.ebi.ac.uk/pub/databases/gwas/summary_statistics/GCST90199001-GCST90200000/GCST90199928	36635386
GCST90203391	2-stearoyl-GPE (18:0) levels	2-stearoyl-GPE (18:0) measurement	106 South Asian	http://ftp.ebi.ac.uk/pub/databases/gwas/summary_statistics/GCST90203001-GCST90204000/GCST90203391	36635386
GCST90202379	2-stearoyl-GPE (18:0) levels	2-stearoyl-GPE (18:0) measurement	101 East Asian	http://ftp.ebi.ac.uk/pub/databases/gwas/summary_statistics/GCST90202001-GCST90203000/GCST90202379	36635386
GCST90202190	3-(3-amino-3-carboxypropyl)uridine levels	3-(3-amino-3-carboxypropyl)uridine measurement	93 East Asian	http://ftp.ebi.ac.uk/pub/databases/gwas/summary_statistics/GCST90202001-GCST90203000/GCST90202190	36635386
GCST90199766	3-(3-amino-3-carboxypropyl)uridine levels	3-(3-amino-3-carboxypropyl)uridine measurement	7679 European	http://ftp.ebi.ac.uk/pub/databases/gwas/summary_statistics/GCST90199001-GCST90200000/GCST90199766	36635386
GCST90201173	3-(3-amino-3-carboxypropyl)uridine levels	3-(3-amino-3-carboxypropyl)uridine measurement	57 African unspecified	http://ftp.ebi.ac.uk/pub/databases/gwas/summary_statistics/GCST90201001-GCST90202000/GCST90201173	36635386
GCST90202251	3-(3-hydroxyphenyl)propionate levels	3-(3-hydroxyphenyl)propionate measurement	94 East Asian	http://ftp.ebi.ac.uk/pub/databases/gwas/summary_statistics/GCST90202001-GCST90203000/GCST90202251	36635386
GCST90199812	3-(3-hydroxyphenyl)propionate levels	3-(3-hydroxyphenyl)propionate measurement	7304 European	http://ftp.ebi.ac.uk/pub/databases/gwas/summary_statistics/GCST90199001-GCST90200000/GCST90199812	36635386
GCST90201218	3-(3-hydroxyphenyl)propionate levels	3-(3-hydroxyphenyl)propionate measurement	50 African unspecified	http://ftp.ebi.ac.uk/pub/databases/gwas/summary_statistics/GCST90201001-GCST90202000/GCST90201218	36635386
GCST90199957	3-(3-hydroxyphenyl)propionate sulfate levels	3-(3-hydroxyphenyl)propionate sulfate measurement	5773 European	http://ftp.ebi.ac.uk/pub/databases/gwas/summary_statistics/GCST90199001-GCST90200000/GCST90199957	36635386
GCST90203429	3-(3-hydroxyphenyl)propionate sulfate levels	3-(3-hydroxyphenyl)propionate sulfate measurement	68 South Asian	http://ftp.ebi.ac.uk/pub/databases/gwas/summary_statistics/GCST90203001-GCST90204000/GCST90203429	36635386
GCST90201370	3-(3-hydroxyphenyl)propionate sulfate levels	3-(3-hydroxyphenyl)propionate sulfate measurement	43 African unspecified	http://ftp.ebi.ac.uk/pub/databases/gwas/summary_statistics/GCST90201001-GCST90202000/GCST90201370	36635386
GCST90202409	3-(3-hydroxyphenyl)propionate sulfate levels	3-(3-hydroxyphenyl)propionate sulfate measurement	75 East Asian	http://ftp.ebi.ac.uk/pub/databases/gwas/summary_statistics/GCST90202001-GCST90203000/GCST90202409	36635386
GCST90202795	3-(4-hydroxyphenyl)lactate levels	3- 4-hydroxyphenyl lactate measurement	103 East Asian	http://ftp.ebi.ac.uk/pub/databases/gwas/summary_statistics/GCST90202001-GCST90203000/GCST90202795	36635386
GCST90203788	3-(4-hydroxyphenyl)lactate levels	3- 4-hydroxyphenyl lactate measurement	108 South Asian	http://ftp.ebi.ac.uk/pub/databases/gwas/summary_statistics/GCST90203001-GCST90204000/GCST90203788	36635386
GCST90200371	3-(4-hydroxyphenyl)lactate levels	3- 4-hydroxyphenyl lactate measurement	8259 European	http://ftp.ebi.ac.uk/pub/databases/gwas/summary_statistics/GCST90200001-GCST90201000/GCST90200371	36635386
GCST90201758	3-(4-hydroxyphenyl)lactate levels	3- 4-hydroxyphenyl lactate measurement	60 African unspecified	http://ftp.ebi.ac.uk/pub/databases/gwas/summary_statistics/GCST90201001-GCST90202000/GCST90201758	36635386
GCST90203285	3,4-dihydroxybutyrate levels	blood 3,4-dihydroxybutyrate measurement	105 South Asian	http://ftp.ebi.ac.uk/pub/databases/gwas/summary_statistics/GCST90203001-GCST90204000/GCST90203285	36635386
GCST90202256	3,4-dihydroxybutyrate levels	blood 3,4-dihydroxybutyrate measurement	102 East Asian	http://ftp.ebi.ac.uk/pub/databases/gwas/summary_statistics/GCST90202001-GCST90203000/GCST90202256	36635386
GCST90199816	3,4-dihydroxybutyrate levels	blood 3,4-dihydroxybutyrate measurement	8142 European	http://ftp.ebi.ac.uk/pub/databases/gwas/summary_statistics/GCST90199001-GCST90200000/GCST90199816	36635386
GCST90201219	3,4-dihydroxybutyrate levels	blood 3,4-dihydroxybutyrate measurement	59 African unspecified	http://ftp.ebi.ac.uk/pub/databases/gwas/summary_statistics/GCST90201001-GCST90202000/GCST90201219	36635386
GCST90201638	3,5-dichloro-2,6-dihydroxybenzoic acid levels	3,5-dichloro-2,6-dihydroxybenzoic acid measurement	58 African unspecified	http://ftp.ebi.ac.uk/pub/databases/gwas/summary_statistics/GCST90201001-GCST90202000/GCST90201638	36635386
GCST90202677	3,5-dichloro-2,6-dihydroxybenzoic acid levels	3,5-dichloro-2,6-dihydroxybenzoic acid measurement	102 East Asian	http://ftp.ebi.ac.uk/pub/databases/gwas/summary_statistics/GCST90202001-GCST90203000/GCST90202677	36635386
GCST90200252	3,5-dichloro-2,6-dihydroxybenzoic acid levels	3,5-dichloro-2,6-dihydroxybenzoic acid measurement	8218 European	http://ftp.ebi.ac.uk/pub/databases/gwas/summary_statistics/GCST90200001-GCST90201000/GCST90200252	36635386
GCST90203680	3,5-dichloro-2,6-dihydroxybenzoic acid levels	3,5-dichloro-2,6-dihydroxybenzoic acid measurement	106 South Asian	http://ftp.ebi.ac.uk/pub/databases/gwas/summary_statistics/GCST90203001-GCST90204000/GCST90203680	36635386
GCST90202197	3,7-dimethylurate levels	3,7-dimethylurate measurement	76 East Asian	http://ftp.ebi.ac.uk/pub/databases/gwas/summary_statistics/GCST90202001-GCST90203000/GCST90202197	36635386
GCST90203222	3,7-dimethylurate levels	3,7-dimethylurate measurement	81 South Asian	http://ftp.ebi.ac.uk/pub/databases/gwas/summary_statistics/GCST90203001-GCST90204000/GCST90203222	36635386
GCST90199755	3,7-dimethylurate levels	3,7-dimethylurate measurement	6894 European	http://ftp.ebi.ac.uk/pub/databases/gwas/summary_statistics/GCST90199001-GCST90200000/GCST90199755	36635386
GCST90201165	3,7-dimethylurate levels	3,7-dimethylurate measurement	38 African unspecified	http://ftp.ebi.ac.uk/pub/databases/gwas/summary_statistics/GCST90201001-GCST90202000/GCST90201165	36635386
GCST90199946	3-acetylphenol sulfate levels	3-acetylphenol sulfate measurement	6897 European	http://ftp.ebi.ac.uk/pub/databases/gwas/summary_statistics/GCST90199001-GCST90200000/GCST90199946	36635386
GCST90203395	3-acetylphenol sulfate levels	3-acetylphenol sulfate measurement	74 South Asian	http://ftp.ebi.ac.uk/pub/databases/gwas/summary_statistics/GCST90203001-GCST90204000/GCST90203395	36635386
GCST90202390	3-acetylphenol sulfate levels	3-acetylphenol sulfate measurement	77 East Asian	http://ftp.ebi.ac.uk/pub/databases/gwas/summary_statistics/GCST90202001-GCST90203000/GCST90202390	36635386
GCST90201347	3-acetylphenol sulfate levels	3-acetylphenol sulfate measurement	47 African unspecified	http://ftp.ebi.ac.uk/pub/databases/gwas/summary_statistics/GCST90201001-GCST90202000/GCST90201347	36635386
GCST90201590	3-amino-2-piperidone levels	3-amino-2-piperidone measurement	59 African unspecified	http://ftp.ebi.ac.uk/pub/databases/gwas/summary_statistics/GCST90201001-GCST90202000/GCST90201590	36635386
GCST90202610	3-amino-2-piperidone levels	3-amino-2-piperidone measurement	104 East Asian	http://ftp.ebi.ac.uk/pub/databases/gwas/summary_statistics/GCST90202001-GCST90203000/GCST90202610	36635386
GCST90200188	3-amino-2-piperidone levels	3-amino-2-piperidone measurement	8237 European	http://ftp.ebi.ac.uk/pub/databases/gwas/summary_statistics/GCST90200001-GCST90201000/GCST90200188	36635386
GCST90203624	3-amino-2-piperidone levels	3-amino-2-piperidone measurement	107 South Asian	http://ftp.ebi.ac.uk/pub/databases/gwas/summary_statistics/GCST90203001-GCST90204000/GCST90203624	36635386
GCST90202741	3-aminoisobutyrate levels	3-aminoisobutyrate measurement	104 East Asian	http://ftp.ebi.ac.uk/pub/databases/gwas/summary_statistics/GCST90202001-GCST90203000/GCST90202741	36635386
GCST90200310	3-aminoisobutyrate levels	3-aminoisobutyrate measurement	8265 European	http://ftp.ebi.ac.uk/pub/databases/gwas/summary_statistics/GCST90200001-GCST90201000/GCST90200310	36635386
GCST90203735	3-aminoisobutyrate levels	3-aminoisobutyrate measurement	108 South Asian	http://ftp.ebi.ac.uk/pub/databases/gwas/summary_statistics/GCST90203001-GCST90204000/GCST90203735	36635386
GCST90201706	3-aminoisobutyrate levels	3-aminoisobutyrate measurement	59 African unspecified	http://ftp.ebi.ac.uk/pub/databases/gwas/summary_statistics/GCST90201001-GCST90202000/GCST90201706	36635386
GCST90200014	3beta-hydroxy-5-cholestenoate levels	3beta-hydroxy-5-cholestenoate measurement	8259 European	http://ftp.ebi.ac.uk/pub/databases/gwas/summary_statistics/GCST90200001-GCST90201000/GCST90200014	36635386
GCST90201420	3beta-hydroxy-5-cholestenoate levels	3beta-hydroxy-5-cholestenoate measurement	60 African unspecified	http://ftp.ebi.ac.uk/pub/databases/gwas/summary_statistics/GCST90201001-GCST90202000/GCST90201420	36635386
GCST90203462	3beta-hydroxy-5-cholestenoate levels	3beta-hydroxy-5-cholestenoate measurement	108 South Asian	http://ftp.ebi.ac.uk/pub/databases/gwas/summary_statistics/GCST90203001-GCST90204000/GCST90203462	36635386
GCST90202453	3beta-hydroxy-5-cholestenoate levels	3beta-hydroxy-5-cholestenoate measurement	103 East Asian	http://ftp.ebi.ac.uk/pub/databases/gwas/summary_statistics/GCST90202001-GCST90203000/GCST90202453	36635386
GCST90199933	3b-hydroxy-5-cholenoic acid levels	3b-hydroxy-5-cholenoic acid measurement	6846 European	http://ftp.ebi.ac.uk/pub/databases/gwas/summary_statistics/GCST90199001-GCST90200000/GCST90199933	36635386
GCST90202371	3b-hydroxy-5-cholenoic acid levels	3b-hydroxy-5-cholenoic acid measurement	71 East Asian	http://ftp.ebi.ac.uk/pub/databases/gwas/summary_statistics/GCST90202001-GCST90203000/GCST90202371	36635386
GCST90201342	3b-hydroxy-5-cholenoic acid levels	3b-hydroxy-5-cholenoic acid measurement	50 African unspecified	http://ftp.ebi.ac.uk/pub/databases/gwas/summary_statistics/GCST90201001-GCST90202000/GCST90201342	36635386
GCST90202691	3-bromo-5-chloro-2,6-dihydroxybenzoic acid levels	3-bromo-5-chloro-2,6-dihydroxybenzoic acid measurement	101 East Asian	http://ftp.ebi.ac.uk/pub/databases/gwas/summary_statistics/GCST90202001-GCST90203000/GCST90202691	36635386
GCST90200255	3-bromo-5-chloro-2,6-dihydroxybenzoic acid levels	3-bromo-5-chloro-2,6-dihydroxybenzoic acid measurement	8127 European	http://ftp.ebi.ac.uk/pub/databases/gwas/summary_statistics/GCST90200001-GCST90201000/GCST90200255	36635386
GCST90203692	3-bromo-5-chloro-2,6-dihydroxybenzoic acid levels	3-bromo-5-chloro-2,6-dihydroxybenzoic acid measurement	98 South Asian	http://ftp.ebi.ac.uk/pub/databases/gwas/summary_statistics/GCST90203001-GCST90204000/GCST90203692	36635386
GCST90201569	3-carboxy-4-methyl-5-pentyl-2-furanpropionate (3-CMPFP) levels	3-carboxy-4-methyl-5-pentyl-2-furanpropionate (3-CMPFP) measurement	60 African unspecified	http://ftp.ebi.ac.uk/pub/databases/gwas/summary_statistics/GCST90201001-GCST90202000/GCST90201569	36635386
GCST90203598	3-carboxy-4-methyl-5-pentyl-2-furanpropionate (3-CMPFP) levels	3-carboxy-4-methyl-5-pentyl-2-furanpropionate (3-CMPFP) measurement	107 South Asian	http://ftp.ebi.ac.uk/pub/databases/gwas/summary_statistics/GCST90203001-GCST90204000/GCST90203598	36635386
GCST90202596	3-carboxy-4-methyl-5-pentyl-2-furanpropionate (3-CMPFP) levels	3-carboxy-4-methyl-5-pentyl-2-furanpropionate (3-CMPFP) measurement	103 East Asian	http://ftp.ebi.ac.uk/pub/databases/gwas/summary_statistics/GCST90202001-GCST90203000/GCST90202596	36635386
GCST90200172	3-carboxy-4-methyl-5-pentyl-2-furanpropionate (3-CMPFP) levels	3-carboxy-4-methyl-5-pentyl-2-furanpropionate (3-CMPFP) measurement	8234 European	http://ftp.ebi.ac.uk/pub/databases/gwas/summary_statistics/GCST90200001-GCST90201000/GCST90200172	36635386
GCST90201114	3-carboxy-4-methyl-5-propyl-2-furanpropanoate (cmpf) levels	3-carboxy-4-methyl-5-propyl-2-furanpropanoate CMPF measurement	60 African unspecified	http://ftp.ebi.ac.uk/pub/databases/gwas/summary_statistics/GCST90201001-GCST90202000/GCST90201114	36635386
GCST90202143	3-carboxy-4-methyl-5-propyl-2-furanpropanoate (cmpf) levels	3-carboxy-4-methyl-5-propyl-2-furanpropanoate CMPF measurement	104 East Asian	http://ftp.ebi.ac.uk/pub/databases/gwas/summary_statistics/GCST90202001-GCST90203000/GCST90202143	36635386
GCST90199712	3-carboxy-4-methyl-5-propyl-2-furanpropanoate (cmpf) levels	3-carboxy-4-methyl-5-propyl-2-furanpropanoate CMPF measurement	8270 European	http://ftp.ebi.ac.uk/pub/databases/gwas/summary_statistics/GCST90199001-GCST90200000/GCST90199712	36635386
GCST90203178	3-carboxy-4-methyl-5-propyl-2-furanpropanoate (cmpf) levels	3-carboxy-4-methyl-5-propyl-2-furanpropanoate CMPF measurement	108 South Asian	http://ftp.ebi.ac.uk/pub/databases/gwas/summary_statistics/GCST90203001-GCST90204000/GCST90203178	36635386
GCST90201639	3-ethylcatechol sulfate (1) levels	3-ethylcatechol sulfate (1) measurement	40 African unspecified	http://ftp.ebi.ac.uk/pub/databases/gwas/summary_statistics/GCST90201001-GCST90202000/GCST90201639	36635386
GCST90202650	3-ethylcatechol sulfate (1) levels	3-ethylcatechol sulfate (1) measurement	78 East Asian	http://ftp.ebi.ac.uk/pub/databases/gwas/summary_statistics/GCST90202001-GCST90203000/GCST90202650	36635386
GCST90200230	3-ethylcatechol sulfate (1) levels	3-ethylcatechol sulfate (1) measurement	7062 European	http://ftp.ebi.ac.uk/pub/databases/gwas/summary_statistics/GCST90200001-GCST90201000/GCST90200230	36635386
GCST90203664	3-ethylcatechol sulfate (1) levels	3-ethylcatechol sulfate (1) measurement	69 South Asian	http://ftp.ebi.ac.uk/pub/databases/gwas/summary_statistics/GCST90203001-GCST90204000/GCST90203664	36635386
GCST90200227	3-ethylcatechol sulfate (2) levels	3-ethylcatechol sulfate (2) measurement	4814 European	http://ftp.ebi.ac.uk/pub/databases/gwas/summary_statistics/GCST90200001-GCST90201000/GCST90200227	36635386
GCST90201575	3-formylindole levels	3-formylindole measurement	60 African unspecified	http://ftp.ebi.ac.uk/pub/databases/gwas/summary_statistics/GCST90201001-GCST90202000/GCST90201575	36635386
GCST90202616	3-formylindole levels	3-formylindole measurement	104 East Asian	http://ftp.ebi.ac.uk/pub/databases/gwas/summary_statistics/GCST90202001-GCST90203000/GCST90202616	36635386
GCST90200184	3-formylindole levels	3-formylindole measurement	8256 European	http://ftp.ebi.ac.uk/pub/databases/gwas/summary_statistics/GCST90200001-GCST90201000/GCST90200184	36635386
GCST90203613	3-formylindole levels	3-formylindole measurement	108 South Asian	http://ftp.ebi.ac.uk/pub/databases/gwas/summary_statistics/GCST90203001-GCST90204000/GCST90203613	36635386
GCST90201108	3-hydroxy-2-ethylpropionate levels	3-hydroxy-2-ethylpropionate measurement	60 African unspecified	http://ftp.ebi.ac.uk/pub/databases/gwas/summary_statistics/GCST90201001-GCST90202000/GCST90201108	36635386
GCST90202142	3-hydroxy-2-ethylpropionate levels	3-hydroxy-2-ethylpropionate measurement	104 East Asian	http://ftp.ebi.ac.uk/pub/databases/gwas/summary_statistics/GCST90202001-GCST90203000/GCST90202142	36635386
GCST90199714	3-hydroxy-2-ethylpropionate levels	3-hydroxy-2-ethylpropionate measurement	8238 European	http://ftp.ebi.ac.uk/pub/databases/gwas/summary_statistics/GCST90199001-GCST90200000/GCST90199714	36635386
GCST90203191	3-hydroxy-2-ethylpropionate levels	3-hydroxy-2-ethylpropionate measurement	106 South Asian	http://ftp.ebi.ac.uk/pub/databases/gwas/summary_statistics/GCST90203001-GCST90204000/GCST90203191	36635386
GCST90201630	3-hydroxy-2-methylpyridine sulfate levels	3-hydroxy-2-methylpyridine sulfate measurement	51 African unspecified	http://ftp.ebi.ac.uk/pub/databases/gwas/summary_statistics/GCST90201001-GCST90202000/GCST90201630	36635386
GCST90202673	3-hydroxy-2-methylpyridine sulfate levels	3-hydroxy-2-methylpyridine sulfate measurement	88 East Asian	http://ftp.ebi.ac.uk/pub/databases/gwas/summary_statistics/GCST90202001-GCST90203000/GCST90202673	36635386
GCST90200225	3-hydroxy-2-methylpyridine sulfate levels	3-hydroxy-2-methylpyridine sulfate measurement	7446 European	http://ftp.ebi.ac.uk/pub/databases/gwas/summary_statistics/GCST90200001-GCST90201000/GCST90200225	36635386
GCST90203668	3-hydroxy-2-methylpyridine sulfate levels	3-hydroxy-2-methylpyridine sulfate measurement	82 South Asian	http://ftp.ebi.ac.uk/pub/databases/gwas/summary_statistics/GCST90203001-GCST90204000/GCST90203668	36635386
GCST90202747	3-hydroxy-3-methylglutarate levels	3-hydroxy-3-methylglutarate measurement	99 East Asian	http://ftp.ebi.ac.uk/pub/databases/gwas/summary_statistics/GCST90202001-GCST90203000/GCST90202747	36635386
GCST90203741	3-hydroxy-3-methylglutarate levels	3-hydroxy-3-methylglutarate measurement	106 South Asian	http://ftp.ebi.ac.uk/pub/databases/gwas/summary_statistics/GCST90203001-GCST90204000/GCST90203741	36635386
GCST90201705	3-hydroxy-3-methylglutarate levels	3-hydroxy-3-methylglutarate measurement	57 African unspecified	http://ftp.ebi.ac.uk/pub/databases/gwas/summary_statistics/GCST90201001-GCST90202000/GCST90201705	36635386
GCST90200298	3-hydroxy-3-methylglutarate levels	3-hydroxy-3-methylglutarate measurement	8073 European	http://ftp.ebi.ac.uk/pub/databases/gwas/summary_statistics/GCST90200001-GCST90201000/GCST90200298	36635386
GCST90201781	3-Hydroxybutyrate levels	3-hydroxybutyrate measurement	60 African unspecified	http://ftp.ebi.ac.uk/pub/databases/gwas/summary_statistics/GCST90201001-GCST90202000/GCST90201781	36635386
GCST90202804	3-Hydroxybutyrate levels	3-hydroxybutyrate measurement	103 East Asian	http://ftp.ebi.ac.uk/pub/databases/gwas/summary_statistics/GCST90202001-GCST90203000/GCST90202804	36635386
GCST90203805	3-Hydroxybutyrate levels	3-hydroxybutyrate measurement	108 South Asian	http://ftp.ebi.ac.uk/pub/databases/gwas/summary_statistics/GCST90203001-GCST90204000/GCST90203805	36635386
GCST90200367	3-Hydroxybutyrate levels	3-hydroxybutyrate measurement	8292 European	http://ftp.ebi.ac.uk/pub/databases/gwas/summary_statistics/GCST90200001-GCST90201000/GCST90200367	36635386
GCST90201572	3-hydroxybutyroylglycine levels	3-hydroxybutyroylglycine measurement	60 African unspecified	http://ftp.ebi.ac.uk/pub/databases/gwas/summary_statistics/GCST90201001-GCST90202000/GCST90201572	36635386
GCST90202621	3-hydroxybutyroylglycine levels	3-hydroxybutyroylglycine measurement	99 East Asian	http://ftp.ebi.ac.uk/pub/databases/gwas/summary_statistics/GCST90202001-GCST90203000/GCST90202621	36635386
GCST90203605	3-hydroxybutyroylglycine levels	3-hydroxybutyroylglycine measurement	106 South Asian	http://ftp.ebi.ac.uk/pub/databases/gwas/summary_statistics/GCST90203001-GCST90204000/GCST90203605	36635386
GCST90200174	3-hydroxybutyroylglycine levels	3-hydroxybutyroylglycine measurement	8171 European	http://ftp.ebi.ac.uk/pub/databases/gwas/summary_statistics/GCST90200001-GCST90201000/GCST90200174	36635386
GCST90201083	3-hydroxydecanoate levels	3-hydroxydecanoate measurement	60 African unspecified	http://ftp.ebi.ac.uk/pub/databases/gwas/summary_statistics/GCST90201001-GCST90202000/GCST90201083	36635386
GCST90199693	3-hydroxydecanoate levels	3-hydroxydecanoate measurement	8239 European	http://ftp.ebi.ac.uk/pub/databases/gwas/summary_statistics/GCST90199001-GCST90200000/GCST90199693	36635386
GCST90203144	3-hydroxydecanoate levels	3-hydroxydecanoate measurement	108 South Asian	http://ftp.ebi.ac.uk/pub/databases/gwas/summary_statistics/GCST90203001-GCST90204000/GCST90203144	36635386
GCST90202114	3-hydroxydecanoate levels	3-hydroxydecanoate measurement	104 East Asian	http://ftp.ebi.ac.uk/pub/databases/gwas/summary_statistics/GCST90202001-GCST90203000/GCST90202114	36635386
GCST90201641	3-hydroxydecanoylcarnitine levels	3-hydroxydecanoylcarnitine measurement	60 African unspecified	http://ftp.ebi.ac.uk/pub/databases/gwas/summary_statistics/GCST90201001-GCST90202000/GCST90201641	36635386
GCST90202680	3-hydroxydecanoylcarnitine levels	3-hydroxydecanoylcarnitine measurement	103 East Asian	http://ftp.ebi.ac.uk/pub/databases/gwas/summary_statistics/GCST90202001-GCST90203000/GCST90202680	36635386
GCST90200246	3-hydroxydecanoylcarnitine levels	3-hydroxydecanoylcarnitine measurement	8237 European	http://ftp.ebi.ac.uk/pub/databases/gwas/summary_statistics/GCST90200001-GCST90201000/GCST90200246	36635386
GCST90203677	3-hydroxydecanoylcarnitine levels	3-hydroxydecanoylcarnitine measurement	108 South Asian	http://ftp.ebi.ac.uk/pub/databases/gwas/summary_statistics/GCST90203001-GCST90204000/GCST90203677	36635386
GCST90203243	3-hydroxydodecanedioate levels	3-hydroxydodecanedioate measurement	83 South Asian	http://ftp.ebi.ac.uk/pub/databases/gwas/summary_statistics/GCST90203001-GCST90204000/GCST90203243	36635386
GCST90202212	3-hydroxydodecanedioate levels	3-hydroxydodecanedioate measurement	89 East Asian	http://ftp.ebi.ac.uk/pub/databases/gwas/summary_statistics/GCST90202001-GCST90203000/GCST90202212	36635386
GCST90199769	3-hydroxydodecanedioate levels	3-hydroxydodecanedioate measurement	7168 European	http://ftp.ebi.ac.uk/pub/databases/gwas/summary_statistics/GCST90199001-GCST90200000/GCST90199769	36635386
GCST90201175	3-hydroxydodecanedioate levels	3-hydroxydodecanedioate measurement	44 African unspecified	http://ftp.ebi.ac.uk/pub/databases/gwas/summary_statistics/GCST90201001-GCST90202000/GCST90201175	36635386
GCST90200012	3-hydroxyhexanoate levels	3-hydroxyhexanoate measurement	8268 European	http://ftp.ebi.ac.uk/pub/databases/gwas/summary_statistics/GCST90200001-GCST90201000/GCST90200012	36635386
GCST90201419	3-hydroxyhexanoate levels	3-hydroxyhexanoate measurement	60 African unspecified	http://ftp.ebi.ac.uk/pub/databases/gwas/summary_statistics/GCST90201001-GCST90202000/GCST90201419	36635386
GCST90203464	3-hydroxyhexanoate levels	3-hydroxyhexanoate measurement	108 South Asian	http://ftp.ebi.ac.uk/pub/databases/gwas/summary_statistics/GCST90203001-GCST90204000/GCST90203464	36635386
GCST90202462	3-hydroxyhexanoate levels	3-hydroxyhexanoate measurement	104 East Asian	http://ftp.ebi.ac.uk/pub/databases/gwas/summary_statistics/GCST90202001-GCST90203000/GCST90202462	36635386
GCST90201617	3-hydroxyhexanoylcarnitine (1) levels	3-hydroxyhexanoylcarnitine (1) measurement	59 African unspecified	http://ftp.ebi.ac.uk/pub/databases/gwas/summary_statistics/GCST90201001-GCST90202000/GCST90201617	36635386
GCST90202662	3-hydroxyhexanoylcarnitine (1) levels	3-hydroxyhexanoylcarnitine (1) measurement	103 East Asian	http://ftp.ebi.ac.uk/pub/databases/gwas/summary_statistics/GCST90202001-GCST90203000/GCST90202662	36635386
GCST90200228	3-hydroxyhexanoylcarnitine (1) levels	3-hydroxyhexanoylcarnitine (1) measurement	8227 European	http://ftp.ebi.ac.uk/pub/databases/gwas/summary_statistics/GCST90200001-GCST90201000/GCST90200228	36635386
GCST90203658	3-hydroxyhexanoylcarnitine (1) levels	3-hydroxyhexanoylcarnitine (1) measurement	108 South Asian	http://ftp.ebi.ac.uk/pub/databases/gwas/summary_statistics/GCST90203001-GCST90204000/GCST90203658	36635386
GCST90202317	3-hydroxyhippurate levels	3-hydroxyhippurate measurement	102 East Asian	http://ftp.ebi.ac.uk/pub/databases/gwas/summary_statistics/GCST90202001-GCST90203000/GCST90202317	36635386
GCST90199869	3-hydroxyhippurate levels	3-hydroxyhippurate measurement	8241 European	http://ftp.ebi.ac.uk/pub/databases/gwas/summary_statistics/GCST90199001-GCST90200000/GCST90199869	36635386
GCST90201273	3-hydroxyhippurate levels	3-hydroxyhippurate measurement	60 African unspecified	http://ftp.ebi.ac.uk/pub/databases/gwas/summary_statistics/GCST90201001-GCST90202000/GCST90201273	36635386
GCST90202740	3-hydroxyisobutyrate levels	3-hydroxyisobutyrate measurement	102 East Asian	http://ftp.ebi.ac.uk/pub/databases/gwas/summary_statistics/GCST90202001-GCST90203000/GCST90202740	36635386
GCST90200308	3-hydroxyisobutyrate levels	3-hydroxyisobutyrate measurement	8177 European	http://ftp.ebi.ac.uk/pub/databases/gwas/summary_statistics/GCST90200001-GCST90201000/GCST90200308	36635386
GCST90203736	3-hydroxyisobutyrate levels	3-hydroxyisobutyrate measurement	108 South Asian	http://ftp.ebi.ac.uk/pub/databases/gwas/summary_statistics/GCST90203001-GCST90204000/GCST90203736	36635386
GCST90201694	3-hydroxyisobutyrate levels	3-hydroxyisobutyrate measurement	59 African unspecified	http://ftp.ebi.ac.uk/pub/databases/gwas/summary_statistics/GCST90201001-GCST90202000/GCST90201694	36635386
GCST90200815	3-hydroxyisobutyrate to adenosine 5'-diphosphate (ADP) ratio	metabolite ratio	4488 European	http://ftp.ebi.ac.uk/pub/databases/gwas/summary_statistics/GCST90200001-GCST90201000/GCST90200815	36635386
GCST90200817	3-hydroxyisobutyrate to phosphate ratio	metabolite ratio	8170 European	http://ftp.ebi.ac.uk/pub/databases/gwas/summary_statistics/GCST90200001-GCST90201000/GCST90200817	36635386
GCST90201103	3-hydroxylaurate levels	3-hydroxylaurate measurement	59 African unspecified	http://ftp.ebi.ac.uk/pub/databases/gwas/summary_statistics/GCST90201001-GCST90202000/GCST90201103	36635386
GCST90202135	3-hydroxylaurate levels	3-hydroxylaurate measurement	104 East Asian	http://ftp.ebi.ac.uk/pub/databases/gwas/summary_statistics/GCST90202001-GCST90203000/GCST90202135	36635386
GCST90199700	3-hydroxylaurate levels	3-hydroxylaurate measurement	8206 European	http://ftp.ebi.ac.uk/pub/databases/gwas/summary_statistics/GCST90199001-GCST90200000/GCST90199700	36635386
GCST90203171	3-hydroxylaurate levels	3-hydroxylaurate measurement	106 South Asian	http://ftp.ebi.ac.uk/pub/databases/gwas/summary_statistics/GCST90203001-GCST90204000/GCST90203171	36635386
GCST90201078	3-hydroxymyristate levels	blood 3-hydroxymyristate measurement	60 African unspecified	http://ftp.ebi.ac.uk/pub/databases/gwas/summary_statistics/GCST90201001-GCST90202000/GCST90201078	36635386
GCST90199674	3-hydroxymyristate levels	blood 3-hydroxymyristate measurement	8235 European	http://ftp.ebi.ac.uk/pub/databases/gwas/summary_statistics/GCST90199001-GCST90200000/GCST90199674	36635386
GCST90203152	3-hydroxymyristate levels	blood 3-hydroxymyristate measurement	108 South Asian	http://ftp.ebi.ac.uk/pub/databases/gwas/summary_statistics/GCST90203001-GCST90204000/GCST90203152	36635386
GCST90202108	3-hydroxymyristate levels	blood 3-hydroxymyristate measurement	104 East Asian	http://ftp.ebi.ac.uk/pub/databases/gwas/summary_statistics/GCST90202001-GCST90203000/GCST90202108	36635386
GCST90201061	3-hydroxyoctanoate levels	3-hydroxyoctanoate measurement	60 African unspecified	http://ftp.ebi.ac.uk/pub/databases/gwas/summary_statistics/GCST90201001-GCST90202000/GCST90201061	36635386
GCST90199680	3-hydroxyoctanoate levels	3-hydroxyoctanoate measurement	8182 European	http://ftp.ebi.ac.uk/pub/databases/gwas/summary_statistics/GCST90199001-GCST90200000/GCST90199680	36635386
GCST90203131	3-hydroxyoctanoate levels	3-hydroxyoctanoate measurement	108 South Asian	http://ftp.ebi.ac.uk/pub/databases/gwas/summary_statistics/GCST90203001-GCST90204000/GCST90203131	36635386
GCST90202097	3-hydroxyoctanoate levels	3-hydroxyoctanoate measurement	103 East Asian	http://ftp.ebi.ac.uk/pub/databases/gwas/summary_statistics/GCST90202001-GCST90203000/GCST90202097	36635386
GCST90202698	3-hydroxyoctanoylcarnitine (1) levels	metabolite measurement	103 East Asian	http://ftp.ebi.ac.uk/pub/databases/gwas/summary_statistics/GCST90202001-GCST90203000/GCST90202698	36635386
GCST90203707	3-hydroxyoctanoylcarnitine (1) levels	metabolite measurement	108 South Asian	http://ftp.ebi.ac.uk/pub/databases/gwas/summary_statistics/GCST90203001-GCST90204000/GCST90203707	36635386
GCST90201673	3-hydroxyoctanoylcarnitine (1) levels	metabolite measurement	60 African unspecified	http://ftp.ebi.ac.uk/pub/databases/gwas/summary_statistics/GCST90201001-GCST90202000/GCST90201673	36635386
GCST90200272	3-hydroxyoctanoylcarnitine (1) levels	metabolite measurement	8245 European	http://ftp.ebi.ac.uk/pub/databases/gwas/summary_statistics/GCST90200001-GCST90201000/GCST90200272	36635386
GCST90202701	3-hydroxyoctanoylcarnitine (2) levels	metabolite measurement	103 East Asian	http://ftp.ebi.ac.uk/pub/databases/gwas/summary_statistics/GCST90202001-GCST90203000/GCST90202701	36635386
GCST90201669	3-hydroxyoctanoylcarnitine (2) levels	metabolite measurement	60 African unspecified	http://ftp.ebi.ac.uk/pub/databases/gwas/summary_statistics/GCST90201001-GCST90202000/GCST90201669	36635386
GCST90200278	3-hydroxyoctanoylcarnitine (2) levels	metabolite measurement	8243 European	http://ftp.ebi.ac.uk/pub/databases/gwas/summary_statistics/GCST90200001-GCST90201000/GCST90200278	36635386
GCST90203703	3-hydroxyoctanoylcarnitine (2) levels	metabolite measurement	108 South Asian	http://ftp.ebi.ac.uk/pub/databases/gwas/summary_statistics/GCST90203001-GCST90204000/GCST90203703	36635386
GCST90201557	3-hydroxyoleoylcarnitine levels	metabolite measurement	49 African unspecified	http://ftp.ebi.ac.uk/pub/databases/gwas/summary_statistics/GCST90201001-GCST90202000/GCST90201557	36635386
GCST90203594	3-hydroxyoleoylcarnitine levels	metabolite measurement	99 South Asian	http://ftp.ebi.ac.uk/pub/databases/gwas/summary_statistics/GCST90203001-GCST90204000/GCST90203594	36635386
GCST90202605	3-hydroxyoleoylcarnitine levels	metabolite measurement	95 East Asian	http://ftp.ebi.ac.uk/pub/databases/gwas/summary_statistics/GCST90202001-GCST90203000/GCST90202605	36635386
GCST90200158	3-hydroxyoleoylcarnitine levels	metabolite measurement	7532 European	http://ftp.ebi.ac.uk/pub/databases/gwas/summary_statistics/GCST90200001-GCST90201000/GCST90200158	36635386
GCST90203591	3-hydroxyphenylacetoylglutamine levels	metabolite measurement	57 South Asian	http://ftp.ebi.ac.uk/pub/databases/gwas/summary_statistics/GCST90203001-GCST90204000/GCST90203591	36635386
GCST90202594	3-hydroxyphenylacetoylglutamine levels	metabolite measurement	54 East Asian	http://ftp.ebi.ac.uk/pub/databases/gwas/summary_statistics/GCST90202001-GCST90203000/GCST90202594	36635386
GCST90200162	3-hydroxyphenylacetoylglutamine levels	metabolite measurement	5371 European	http://ftp.ebi.ac.uk/pub/databases/gwas/summary_statistics/GCST90200001-GCST90201000/GCST90200162	36635386
GCST90200211	3-hydroxypyridine glucuronide levels	3-hydroxypyridine glucuronide measurement	5882 European	http://ftp.ebi.ac.uk/pub/databases/gwas/summary_statistics/GCST90200001-GCST90201000/GCST90200211	36635386
GCST90199990	3-hydroxypyridine sulfate levels	3-hydroxypyridine sulfate measurement	8270 European	http://ftp.ebi.ac.uk/pub/databases/gwas/summary_statistics/GCST90199001-GCST90200000/GCST90199990	36635386
GCST90203428	3-hydroxypyridine sulfate levels	3-hydroxypyridine sulfate measurement	107 South Asian	http://ftp.ebi.ac.uk/pub/databases/gwas/summary_statistics/GCST90203001-GCST90204000/GCST90203428	36635386
GCST90201389	3-hydroxypyridine sulfate levels	3-hydroxypyridine sulfate measurement	60 African unspecified	http://ftp.ebi.ac.uk/pub/databases/gwas/summary_statistics/GCST90201001-GCST90202000/GCST90201389	36635386
GCST90202432	3-hydroxypyridine sulfate levels	3-hydroxypyridine sulfate measurement	104 East Asian	http://ftp.ebi.ac.uk/pub/databases/gwas/summary_statistics/GCST90202001-GCST90203000/GCST90202432	36635386
GCST90201104	3-hydroxysebacate levels	3-hydroxysebacate measurement	49 African unspecified	http://ftp.ebi.ac.uk/pub/databases/gwas/summary_statistics/GCST90201001-GCST90202000/GCST90201104	36635386
GCST90202137	3-hydroxysebacate levels	3-hydroxysebacate measurement	89 East Asian	http://ftp.ebi.ac.uk/pub/databases/gwas/summary_statistics/GCST90202001-GCST90203000/GCST90202137	36635386
GCST90199704	3-hydroxysebacate levels	3-hydroxysebacate measurement	7325 European	http://ftp.ebi.ac.uk/pub/databases/gwas/summary_statistics/GCST90199001-GCST90200000/GCST90199704	36635386
GCST90203168	3-hydroxysebacate levels	3-hydroxysebacate measurement	91 South Asian	http://ftp.ebi.ac.uk/pub/databases/gwas/summary_statistics/GCST90203001-GCST90204000/GCST90203168	36635386
GCST90201603	3-indoleglyoxylic acid levels	3-indoleglyoxylic acid measurement	59 African unspecified	http://ftp.ebi.ac.uk/pub/databases/gwas/summary_statistics/GCST90201001-GCST90202000/GCST90201603	36635386
GCST90202625	3-indoleglyoxylic acid levels	3-indoleglyoxylic acid measurement	100 East Asian	http://ftp.ebi.ac.uk/pub/databases/gwas/summary_statistics/GCST90202001-GCST90203000/GCST90202625	36635386
GCST90200205	3-indoleglyoxylic acid levels	3-indoleglyoxylic acid measurement	7848 European	http://ftp.ebi.ac.uk/pub/databases/gwas/summary_statistics/GCST90200001-GCST90201000/GCST90200205	36635386
GCST90203628	3-indoleglyoxylic acid levels	3-indoleglyoxylic acid measurement	101 South Asian	http://ftp.ebi.ac.uk/pub/databases/gwas/summary_statistics/GCST90203001-GCST90204000/GCST90203628	36635386
GCST90201050	3-indoxyl sulfate levels	indoxyl sulfate measurement	59 African unspecified	http://ftp.ebi.ac.uk/pub/databases/gwas/summary_statistics/GCST90201001-GCST90202000/GCST90201050	36635386
GCST90199656	3-indoxyl sulfate levels	indoxyl sulfate measurement	8242 European	http://ftp.ebi.ac.uk/pub/databases/gwas/summary_statistics/GCST90199001-GCST90200000/GCST90199656	36635386
GCST90203129	3-indoxyl sulfate levels	indoxyl sulfate measurement	107 South Asian	http://ftp.ebi.ac.uk/pub/databases/gwas/summary_statistics/GCST90203001-GCST90204000/GCST90203129	36635386
GCST90202093	3-indoxyl sulfate levels	indoxyl sulfate measurement	103 East Asian	http://ftp.ebi.ac.uk/pub/databases/gwas/summary_statistics/GCST90202001-GCST90203000/GCST90202093	36635386
GCST90200009	3-methoxycatechol sulfate (1) levels	3-methoxycatechol sulfate (1) measurement	8194 European	http://ftp.ebi.ac.uk/pub/databases/gwas/summary_statistics/GCST90200001-GCST90201000/GCST90200009	36635386
GCST90201422	3-methoxycatechol sulfate (1) levels	3-methoxycatechol sulfate (1) measurement	60 African unspecified	http://ftp.ebi.ac.uk/pub/databases/gwas/summary_statistics/GCST90201001-GCST90202000/GCST90201422	36635386
GCST90203452	3-methoxycatechol sulfate (1) levels	3-methoxycatechol sulfate (1) measurement	108 South Asian	http://ftp.ebi.ac.uk/pub/databases/gwas/summary_statistics/GCST90203001-GCST90204000/GCST90203452	36635386
GCST90202460	3-methoxycatechol sulfate (1) levels	3-methoxycatechol sulfate (1) measurement	103 East Asian	http://ftp.ebi.ac.uk/pub/databases/gwas/summary_statistics/GCST90202001-GCST90203000/GCST90202460	36635386
GCST90200007	3-methoxycatechol sulfate (2) levels	3-methoxycatechol sulfate (2) measurement	7286 European	http://ftp.ebi.ac.uk/pub/databases/gwas/summary_statistics/GCST90200001-GCST90201000/GCST90200007	36635386
GCST90201424	3-methoxycatechol sulfate (2) levels	3-methoxycatechol sulfate (2) measurement	49 African unspecified	http://ftp.ebi.ac.uk/pub/databases/gwas/summary_statistics/GCST90201001-GCST90202000/GCST90201424	36635386
GCST90203460	3-methoxycatechol sulfate (2) levels	3-methoxycatechol sulfate (2) measurement	85 South Asian	http://ftp.ebi.ac.uk/pub/databases/gwas/summary_statistics/GCST90203001-GCST90204000/GCST90203460	36635386
GCST90199953	3-methoxytyramine sulfate levels	3-methoxytyramine sulfate measurement	5419 European	http://ftp.ebi.ac.uk/pub/databases/gwas/summary_statistics/GCST90199001-GCST90200000/GCST90199953	36635386
GCST90203400	3-methoxytyramine sulfate levels	3-methoxytyramine sulfate measurement	68 South Asian	http://ftp.ebi.ac.uk/pub/databases/gwas/summary_statistics/GCST90203001-GCST90204000/GCST90203400	36635386
GCST90202400	3-methoxytyramine sulfate levels	3-methoxytyramine sulfate measurement	71 East Asian	http://ftp.ebi.ac.uk/pub/databases/gwas/summary_statistics/GCST90202001-GCST90203000/GCST90202400	36635386
GCST90201361	3-methoxytyramine sulfate levels	3-methoxytyramine sulfate measurement	41 African unspecified	http://ftp.ebi.ac.uk/pub/databases/gwas/summary_statistics/GCST90201001-GCST90202000/GCST90201361	36635386
GCST90200328	3-methoxytyrosine levels	3-methoxytyrosine measurement	8258 European	http://ftp.ebi.ac.uk/pub/databases/gwas/summary_statistics/GCST90200001-GCST90201000/GCST90200328	36635386
GCST90203760	3-methoxytyrosine levels	3-methoxytyrosine measurement	106 South Asian	http://ftp.ebi.ac.uk/pub/databases/gwas/summary_statistics/GCST90203001-GCST90204000/GCST90203760	36635386
GCST90201725	3-methoxytyrosine levels	3-methoxytyrosine measurement	60 African unspecified	http://ftp.ebi.ac.uk/pub/databases/gwas/summary_statistics/GCST90201001-GCST90202000/GCST90201725	36635386
GCST90199938	3-methyl catechol sulfate (1) levels	3-methyl catechol sulfate (1) measurement	8233 European	http://ftp.ebi.ac.uk/pub/databases/gwas/summary_statistics/GCST90199001-GCST90200000/GCST90199938	36635386
GCST90203380	3-methyl catechol sulfate (1) levels	3-methyl catechol sulfate (1) measurement	105 South Asian	http://ftp.ebi.ac.uk/pub/databases/gwas/summary_statistics/GCST90203001-GCST90204000/GCST90203380	36635386
GCST90202384	3-methyl catechol sulfate (1) levels	3-methyl catechol sulfate (1) measurement	103 East Asian	http://ftp.ebi.ac.uk/pub/databases/gwas/summary_statistics/GCST90202001-GCST90203000/GCST90202384	36635386
GCST90201343	3-methyl catechol sulfate (1) levels	3-methyl catechol sulfate (1) measurement	59 African unspecified	http://ftp.ebi.ac.uk/pub/databases/gwas/summary_statistics/GCST90201001-GCST90202000/GCST90201343	36635386
GCST90199936	3-methyl catechol sulfate (2) levels	3-methyl catechol sulfate (2) measurement	6320 European	http://ftp.ebi.ac.uk/pub/databases/gwas/summary_statistics/GCST90199001-GCST90200000/GCST90199936	36635386
GCST90203379	3-methyl catechol sulfate (2) levels	3-methyl catechol sulfate (2) measurement	65 South Asian	http://ftp.ebi.ac.uk/pub/databases/gwas/summary_statistics/GCST90203001-GCST90204000/GCST90203379	36635386
GCST90202380	3-methyl catechol sulfate (2) levels	3-methyl catechol sulfate (2) measurement	68 East Asian	http://ftp.ebi.ac.uk/pub/databases/gwas/summary_statistics/GCST90202001-GCST90203000/GCST90202380	36635386
GCST90201344	3-methyl catechol sulfate (2) levels	3-methyl catechol sulfate (2) measurement	32 African unspecified	http://ftp.ebi.ac.uk/pub/databases/gwas/summary_statistics/GCST90201001-GCST90202000/GCST90201344	36635386
GCST90201079	3-methyl-2-oxobutyrate levels	3-methyl-2-oxobutyrate measurement	59 African unspecified	http://ftp.ebi.ac.uk/pub/databases/gwas/summary_statistics/GCST90201001-GCST90202000/GCST90201079	36635386
GCST90199677	3-methyl-2-oxobutyrate levels	3-methyl-2-oxobutyrate measurement	8254 European	http://ftp.ebi.ac.uk/pub/databases/gwas/summary_statistics/GCST90199001-GCST90200000/GCST90199677	36635386
GCST90203146	3-methyl-2-oxobutyrate levels	3-methyl-2-oxobutyrate measurement	108 South Asian	http://ftp.ebi.ac.uk/pub/databases/gwas/summary_statistics/GCST90203001-GCST90204000/GCST90203146	36635386
GCST90202111	3-methyl-2-oxobutyrate levels	3-methyl-2-oxobutyrate measurement	104 East Asian	http://ftp.ebi.ac.uk/pub/databases/gwas/summary_statistics/GCST90202001-GCST90203000/GCST90202111	36635386
GCST90201024	3-methyl-2-oxovalerate levels	3-methyl-2-oxovalerate measurement	60 African unspecified	http://ftp.ebi.ac.uk/pub/databases/gwas/summary_statistics/GCST90201001-GCST90202000/GCST90201024	36635386
GCST90203114	3-methyl-2-oxovalerate levels	3-methyl-2-oxovalerate measurement	108 South Asian	http://ftp.ebi.ac.uk/pub/databases/gwas/summary_statistics/GCST90203001-GCST90204000/GCST90203114	36635386
GCST90202066	3-methyl-2-oxovalerate levels	3-methyl-2-oxovalerate measurement	104 East Asian	http://ftp.ebi.ac.uk/pub/databases/gwas/summary_statistics/GCST90202001-GCST90203000/GCST90202066	36635386
GCST90199631	3-methyl-2-oxovalerate levels	3-methyl-2-oxovalerate measurement	8257 European	http://ftp.ebi.ac.uk/pub/databases/gwas/summary_statistics/GCST90199001-GCST90200000/GCST90199631	36635386
GCST90201012	3-methyl-2-oxovalerate to 3-methyl-2-oxobutyrate ratio	metabolite ratio	8200 European	http://ftp.ebi.ac.uk/pub/databases/gwas/summary_statistics/GCST90201001-GCST90202000/GCST90201012	36635386
GCST90201011	3-methyl-2-oxovalerate to 4-methyl-2-oxopentanoate ratio	metabolite ratio	8233 European	http://ftp.ebi.ac.uk/pub/databases/gwas/summary_statistics/GCST90201001-GCST90202000/GCST90201011	36635386
GCST90203271	3-methyladipate levels	3-methyladipate measurement	76 South Asian	http://ftp.ebi.ac.uk/pub/databases/gwas/summary_statistics/GCST90203001-GCST90204000/GCST90203271	36635386
GCST90202266	3-methyladipate levels	3-methyladipate measurement	82 East Asian	http://ftp.ebi.ac.uk/pub/databases/gwas/summary_statistics/GCST90202001-GCST90203000/GCST90202266	36635386
GCST90199829	3-methyladipate levels	3-methyladipate measurement	6958 European	http://ftp.ebi.ac.uk/pub/databases/gwas/summary_statistics/GCST90199001-GCST90200000/GCST90199829	36635386
GCST90201236	3-methyladipate levels	3-methyladipate measurement	41 African unspecified	http://ftp.ebi.ac.uk/pub/databases/gwas/summary_statistics/GCST90201001-GCST90202000/GCST90201236	36635386
GCST90200682	3-methylcytidine levels	3-methylcytidine measurement	8117 European	http://ftp.ebi.ac.uk/pub/databases/gwas/summary_statistics/GCST90200001-GCST90201000/GCST90200682	36635386
GCST90203231	3-methylcytidine levels	3-methylcytidine measurement	107 South Asian	http://ftp.ebi.ac.uk/pub/databases/gwas/summary_statistics/GCST90203001-GCST90204000/GCST90203231	36635386
GCST90202213	3-methylcytidine levels	3-methylcytidine measurement	101 East Asian	http://ftp.ebi.ac.uk/pub/databases/gwas/summary_statistics/GCST90202001-GCST90203000/GCST90202213	36635386
GCST90201186	3-methylcytidine levels	3-methylcytidine measurement	57 African unspecified	http://ftp.ebi.ac.uk/pub/databases/gwas/summary_statistics/GCST90201001-GCST90202000/GCST90201186	36635386
GCST90201292	3-methylglutaconate levels	3-methylglutaconate measurement	59 African unspecified	http://ftp.ebi.ac.uk/pub/databases/gwas/summary_statistics/GCST90201001-GCST90202000/GCST90201292	36635386
GCST90202332	3-methylglutaconate levels	3-methylglutaconate measurement	101 East Asian	http://ftp.ebi.ac.uk/pub/databases/gwas/summary_statistics/GCST90202001-GCST90203000/GCST90202332	36635386
GCST90199886	3-methylglutaconate levels	3-methylglutaconate measurement	8197 European	http://ftp.ebi.ac.uk/pub/databases/gwas/summary_statistics/GCST90199001-GCST90200000/GCST90199886	36635386
GCST90203349	3-methylglutaconate levels	3-methylglutaconate measurement	107 South Asian	http://ftp.ebi.ac.uk/pub/databases/gwas/summary_statistics/GCST90203001-GCST90204000/GCST90203349	36635386
GCST90199971	3-methylglutarylcarnitine (2) levels	3-methylglutarylcarnitine (2) measurement	8220 European	http://ftp.ebi.ac.uk/pub/databases/gwas/summary_statistics/GCST90199001-GCST90200000/GCST90199971	36635386
GCST90203416	3-methylglutarylcarnitine (2) levels	3-methylglutarylcarnitine (2) measurement	107 South Asian	http://ftp.ebi.ac.uk/pub/databases/gwas/summary_statistics/GCST90203001-GCST90204000/GCST90203416	36635386
GCST90201385	3-methylglutarylcarnitine (2) levels	3-methylglutarylcarnitine (2) measurement	58 African unspecified	http://ftp.ebi.ac.uk/pub/databases/gwas/summary_statistics/GCST90201001-GCST90202000/GCST90201385	36635386
GCST90202417	3-methylglutarylcarnitine (2) levels	3-methylglutarylcarnitine (2) measurement	101 East Asian	http://ftp.ebi.ac.uk/pub/databases/gwas/summary_statistics/GCST90202001-GCST90203000/GCST90202417	36635386
GCST90201025	3-methylhistidine levels	3-methylhistidine measurement	60 African unspecified	http://ftp.ebi.ac.uk/pub/databases/gwas/summary_statistics/GCST90201001-GCST90202000/GCST90201025	36635386
GCST90203107	3-methylhistidine levels	3-methylhistidine measurement	107 South Asian	http://ftp.ebi.ac.uk/pub/databases/gwas/summary_statistics/GCST90203001-GCST90204000/GCST90203107	36635386
GCST90202061	3-methylhistidine levels	3-methylhistidine measurement	104 East Asian	http://ftp.ebi.ac.uk/pub/databases/gwas/summary_statistics/GCST90202001-GCST90203000/GCST90202061	36635386
GCST90199628	3-methylhistidine levels	3-methylhistidine measurement	8289 European	http://ftp.ebi.ac.uk/pub/databases/gwas/summary_statistics/GCST90199001-GCST90200000/GCST90199628	36635386
GCST90201100	3-methylxanthine levels	3-methylxanthine measurement	55 African unspecified	http://ftp.ebi.ac.uk/pub/databases/gwas/summary_statistics/GCST90201001-GCST90202000/GCST90201100	36635386
GCST90202136	3-methylxanthine levels	3-methylxanthine measurement	100 East Asian	http://ftp.ebi.ac.uk/pub/databases/gwas/summary_statistics/GCST90202001-GCST90203000/GCST90202136	36635386
GCST90199699	3-methylxanthine levels	3-methylxanthine measurement	8085 European	http://ftp.ebi.ac.uk/pub/databases/gwas/summary_statistics/GCST90199001-GCST90200000/GCST90199699	36635386
GCST90203172	3-methylxanthine levels	3-methylxanthine measurement	100 South Asian	http://ftp.ebi.ac.uk/pub/databases/gwas/summary_statistics/GCST90203001-GCST90204000/GCST90203172	36635386
GCST90201035	3-phenylpropionate hydrocinnamate levels	3-phenylpropionate hydrocinnamate measurement	57 African unspecified	http://ftp.ebi.ac.uk/pub/databases/gwas/summary_statistics/GCST90201001-GCST90202000/GCST90201035	36635386
GCST90203111	3-phenylpropionate hydrocinnamate levels	3-phenylpropionate hydrocinnamate measurement	91 South Asian	http://ftp.ebi.ac.uk/pub/databases/gwas/summary_statistics/GCST90203001-GCST90204000/GCST90203111	36635386
GCST90202064	3-phenylpropionate hydrocinnamate levels	3-phenylpropionate hydrocinnamate measurement	102 East Asian	http://ftp.ebi.ac.uk/pub/databases/gwas/summary_statistics/GCST90202001-GCST90203000/GCST90202064	36635386
GCST90199635	3-phenylpropionate hydrocinnamate levels	3-phenylpropionate hydrocinnamate measurement	7925 European	http://ftp.ebi.ac.uk/pub/databases/gwas/summary_statistics/GCST90199001-GCST90200000/GCST90199635	36635386
GCST90202762	3-phosphoglycerate levels	3-phosphoglycerate measurement	103 East Asian	http://ftp.ebi.ac.uk/pub/databases/gwas/summary_statistics/GCST90202001-GCST90203000/GCST90202762	36635386
GCST90200329	3-phosphoglycerate levels	3-phosphoglycerate measurement	8196 European	http://ftp.ebi.ac.uk/pub/databases/gwas/summary_statistics/GCST90200001-GCST90201000/GCST90200329	36635386
GCST90203755	3-phosphoglycerate levels	3-phosphoglycerate measurement	107 South Asian	http://ftp.ebi.ac.uk/pub/databases/gwas/summary_statistics/GCST90203001-GCST90204000/GCST90203755	36635386
GCST90201726	3-phosphoglycerate levels	3-phosphoglycerate measurement	57 African unspecified	http://ftp.ebi.ac.uk/pub/databases/gwas/summary_statistics/GCST90201001-GCST90202000/GCST90201726	36635386
GCST90200717	3-phosphoglycerate to adenosine 5'-diphosphate (ADP) ratio	metabolite ratio	4530 European	http://ftp.ebi.ac.uk/pub/databases/gwas/summary_statistics/GCST90200001-GCST90201000/GCST90200717	36635386
GCST90200819	3-phosphoglycerate to glycerate ratio	metabolite ratio	8101 European	http://ftp.ebi.ac.uk/pub/databases/gwas/summary_statistics/GCST90200001-GCST90201000/GCST90200819	36635386
GCST90200729	3-phosphoglycerate to phosphate ratio	metabolite ratio	8153 European	http://ftp.ebi.ac.uk/pub/databases/gwas/summary_statistics/GCST90200001-GCST90201000/GCST90200729	36635386
GCST90202731	3-ureidopropionate levels	3-ureidopropionate measurement	99 East Asian	http://ftp.ebi.ac.uk/pub/databases/gwas/summary_statistics/GCST90202001-GCST90203000/GCST90202731	36635386
GCST90203725	3-ureidopropionate levels	3-ureidopropionate measurement	103 South Asian	http://ftp.ebi.ac.uk/pub/databases/gwas/summary_statistics/GCST90203001-GCST90204000/GCST90203725	36635386
GCST90200283	3-ureidopropionate levels	3-ureidopropionate measurement	7543 European	http://ftp.ebi.ac.uk/pub/databases/gwas/summary_statistics/GCST90200001-GCST90201000/GCST90200283	36635386
GCST90202744	4-acetamidobutanoate levels	4-acetamidobutanoate measurement	103 East Asian	http://ftp.ebi.ac.uk/pub/databases/gwas/summary_statistics/GCST90202001-GCST90203000/GCST90202744	36635386
GCST90200311	4-acetamidobutanoate levels	4-acetamidobutanoate measurement	8154 European	http://ftp.ebi.ac.uk/pub/databases/gwas/summary_statistics/GCST90200001-GCST90201000/GCST90200311	36635386
GCST90203731	4-acetamidobutanoate levels	4-acetamidobutanoate measurement	105 South Asian	http://ftp.ebi.ac.uk/pub/databases/gwas/summary_statistics/GCST90203001-GCST90204000/GCST90203731	36635386
GCST90201701	4-acetamidobutanoate levels	4-acetamidobutanoate measurement	58 African unspecified	http://ftp.ebi.ac.uk/pub/databases/gwas/summary_statistics/GCST90201001-GCST90202000/GCST90201701	36635386
GCST90200346	4-acetaminophen sulfate levels	4-acetaminophen sulfate measurement	4197 European	http://ftp.ebi.ac.uk/pub/databases/gwas/summary_statistics/GCST90200001-GCST90201000/GCST90200346	36635386
GCST90201749	4-acetaminophen sulfate levels	4-acetaminophen sulfate measurement	33 African unspecified	http://ftp.ebi.ac.uk/pub/databases/gwas/summary_statistics/GCST90201001-GCST90202000/GCST90201749	36635386
GCST90202655	4-acetylcatechol sulfate (1) levels	4-acetylcatechol sulfate (1) measurement	88 East Asian	http://ftp.ebi.ac.uk/pub/databases/gwas/summary_statistics/GCST90202001-GCST90203000/GCST90202655	36635386
GCST90201646	4-acetylcatechol sulfate (1) levels	4-acetylcatechol sulfate (1) measurement	54 African unspecified	http://ftp.ebi.ac.uk/pub/databases/gwas/summary_statistics/GCST90201001-GCST90202000/GCST90201646	36635386
GCST90200232	4-acetylcatechol sulfate (1) levels	4-acetylcatechol sulfate (1) measurement	7565 European	http://ftp.ebi.ac.uk/pub/databases/gwas/summary_statistics/GCST90200001-GCST90201000/GCST90200232	36635386
GCST90203665	4-acetylcatechol sulfate (1) levels	4-acetylcatechol sulfate (1) measurement	90 South Asian	http://ftp.ebi.ac.uk/pub/databases/gwas/summary_statistics/GCST90203001-GCST90204000/GCST90203665	36635386
GCST90201071	4-acetylphenol sulfate levels	4-acetylphenol sulfate measurement	52 African unspecified	http://ftp.ebi.ac.uk/pub/databases/gwas/summary_statistics/GCST90201001-GCST90202000/GCST90201071	36635386
GCST90199663	4-acetylphenol sulfate levels	4-acetylphenol sulfate measurement	7135 European	http://ftp.ebi.ac.uk/pub/databases/gwas/summary_statistics/GCST90199001-GCST90200000/GCST90199663	36635386
GCST90203130	4-acetylphenol sulfate levels	4-acetylphenol sulfate measurement	92 South Asian	http://ftp.ebi.ac.uk/pub/databases/gwas/summary_statistics/GCST90203001-GCST90204000/GCST90203130	36635386
GCST90202083	4-acetylphenol sulfate levels	4-acetylphenol sulfate measurement	95 East Asian	http://ftp.ebi.ac.uk/pub/databases/gwas/summary_statistics/GCST90202001-GCST90203000/GCST90202083	36635386
GCST90201614	4-allylcatechol sulfate levels	4-allylcatechol sulfate measurement	60 African unspecified	http://ftp.ebi.ac.uk/pub/databases/gwas/summary_statistics/GCST90201001-GCST90202000/GCST90201614	36635386
GCST90202660	4-allylcatechol sulfate levels	4-allylcatechol sulfate measurement	103 East Asian	http://ftp.ebi.ac.uk/pub/databases/gwas/summary_statistics/GCST90202001-GCST90203000/GCST90202660	36635386
GCST90200220	4-allylcatechol sulfate levels	4-allylcatechol sulfate measurement	8139 European	http://ftp.ebi.ac.uk/pub/databases/gwas/summary_statistics/GCST90200001-GCST90201000/GCST90200220	36635386
GCST90203652	4-allylcatechol sulfate levels	4-allylcatechol sulfate measurement	107 South Asian	http://ftp.ebi.ac.uk/pub/databases/gwas/summary_statistics/GCST90203001-GCST90204000/GCST90203652	36635386
GCST90203294	4-allylphenol sulfate levels	4-allylphenol sulfate measurement	108 South Asian	http://ftp.ebi.ac.uk/pub/databases/gwas/summary_statistics/GCST90203001-GCST90204000/GCST90203294	36635386
GCST90202278	4-allylphenol sulfate levels	4-allylphenol sulfate measurement	104 East Asian	http://ftp.ebi.ac.uk/pub/databases/gwas/summary_statistics/GCST90202001-GCST90203000/GCST90202278	36635386
GCST90199847	4-allylphenol sulfate levels	4-allylphenol sulfate measurement	8240 European	http://ftp.ebi.ac.uk/pub/databases/gwas/summary_statistics/GCST90199001-GCST90200000/GCST90199847	36635386
GCST90201252	4-allylphenol sulfate levels	4-allylphenol sulfate measurement	60 African unspecified	http://ftp.ebi.ac.uk/pub/databases/gwas/summary_statistics/GCST90201001-GCST90202000/GCST90201252	36635386
GCST90201293	4-cholesten-3-one levels	4-cholesten-3-one measurement	51 African unspecified	http://ftp.ebi.ac.uk/pub/databases/gwas/summary_statistics/GCST90201001-GCST90202000/GCST90201293	36635386
GCST90202322	4-cholesten-3-one levels	4-cholesten-3-one measurement	81 East Asian	http://ftp.ebi.ac.uk/pub/databases/gwas/summary_statistics/GCST90202001-GCST90203000/GCST90202322	36635386
GCST90199870	4-cholesten-3-one levels	4-cholesten-3-one measurement	6990 European	http://ftp.ebi.ac.uk/pub/databases/gwas/summary_statistics/GCST90199001-GCST90200000/GCST90199870	36635386
GCST90203325	4-cholesten-3-one levels	4-cholesten-3-one measurement	83 South Asian	http://ftp.ebi.ac.uk/pub/databases/gwas/summary_statistics/GCST90203001-GCST90204000/GCST90203325	36635386
GCST90201610	4-ethylcatechol sulfate levels	4-ethylcatechol sulfate measurement	60 African unspecified	http://ftp.ebi.ac.uk/pub/databases/gwas/summary_statistics/GCST90201001-GCST90202000/GCST90201610	36635386
GCST90202654	4-ethylcatechol sulfate levels	4-ethylcatechol sulfate measurement	99 East Asian	http://ftp.ebi.ac.uk/pub/databases/gwas/summary_statistics/GCST90202001-GCST90203000/GCST90202654	36635386
GCST90200215	4-ethylcatechol sulfate levels	4-ethylcatechol sulfate measurement	8222 European	http://ftp.ebi.ac.uk/pub/databases/gwas/summary_statistics/GCST90200001-GCST90201000/GCST90200215	36635386
GCST90203646	4-ethylcatechol sulfate levels	4-ethylcatechol sulfate measurement	105 South Asian	http://ftp.ebi.ac.uk/pub/databases/gwas/summary_statistics/GCST90203001-GCST90204000/GCST90203646	36635386
GCST90203275	4-ethylphenylsulfate levels	4-ethylphenylsulfate measurement	106 South Asian	http://ftp.ebi.ac.uk/pub/databases/gwas/summary_statistics/GCST90203001-GCST90204000/GCST90203275	36635386
GCST90202272	4-ethylphenylsulfate levels	4-ethylphenylsulfate measurement	104 East Asian	http://ftp.ebi.ac.uk/pub/databases/gwas/summary_statistics/GCST90202001-GCST90203000/GCST90202272	36635386
GCST90199830	4-ethylphenylsulfate levels	4-ethylphenylsulfate measurement	8139 European	http://ftp.ebi.ac.uk/pub/databases/gwas/summary_statistics/GCST90199001-GCST90200000/GCST90199830	36635386
GCST90201233	4-ethylphenylsulfate levels	4-ethylphenylsulfate measurement	60 African unspecified	http://ftp.ebi.ac.uk/pub/databases/gwas/summary_statistics/GCST90201001-GCST90202000/GCST90201233	36635386
GCST90201040	4-guanidinobutanoate levels	4-guanidinobutanoate measurement	58 African unspecified	http://ftp.ebi.ac.uk/pub/databases/gwas/summary_statistics/GCST90201001-GCST90202000/GCST90201040	36635386
GCST90203105	4-guanidinobutanoate levels	4-guanidinobutanoate measurement	108 South Asian	http://ftp.ebi.ac.uk/pub/databases/gwas/summary_statistics/GCST90203001-GCST90204000/GCST90203105	36635386
GCST90202072	4-guanidinobutanoate levels	4-guanidinobutanoate measurement	103 East Asian	http://ftp.ebi.ac.uk/pub/databases/gwas/summary_statistics/GCST90202001-GCST90203000/GCST90202072	36635386
GCST90199640	4-guanidinobutanoate levels	4-guanidinobutanoate measurement	8144 European	http://ftp.ebi.ac.uk/pub/databases/gwas/summary_statistics/GCST90199001-GCST90200000/GCST90199640	36635386
GCST90201312	4-hydroxy-2-oxoglutaric acid levels	4-hydroxy-2-oxoglutaric acid measurement	55 African unspecified	http://ftp.ebi.ac.uk/pub/databases/gwas/summary_statistics/GCST90201001-GCST90202000/GCST90201312	36635386
GCST90202337	4-hydroxy-2-oxoglutaric acid levels	4-hydroxy-2-oxoglutaric acid measurement	101 East Asian	http://ftp.ebi.ac.uk/pub/databases/gwas/summary_statistics/GCST90202001-GCST90203000/GCST90202337	36635386
GCST90199897	4-hydroxy-2-oxoglutaric acid levels	4-hydroxy-2-oxoglutaric acid measurement	7919 European	http://ftp.ebi.ac.uk/pub/databases/gwas/summary_statistics/GCST90199001-GCST90200000/GCST90199897	36635386
GCST90203341	4-hydroxy-2-oxoglutaric acid levels	4-hydroxy-2-oxoglutaric acid measurement	103 South Asian	http://ftp.ebi.ac.uk/pub/databases/gwas/summary_statistics/GCST90203001-GCST90204000/GCST90203341	36635386
GCST90199977	4-hydroxychlorothalonil levels	4-hydroxychlorothalonil measurement	8216 European	http://ftp.ebi.ac.uk/pub/databases/gwas/summary_statistics/GCST90199001-GCST90200000/GCST90199977	36635386
GCST90203422	4-hydroxychlorothalonil levels	4-hydroxychlorothalonil measurement	107 South Asian	http://ftp.ebi.ac.uk/pub/databases/gwas/summary_statistics/GCST90203001-GCST90204000/GCST90203422	36635386
GCST90201396	4-hydroxychlorothalonil levels	4-hydroxychlorothalonil measurement	60 African unspecified	http://ftp.ebi.ac.uk/pub/databases/gwas/summary_statistics/GCST90201001-GCST90202000/GCST90201396	36635386
GCST90202422	4-hydroxychlorothalonil levels	4-hydroxychlorothalonil measurement	103 East Asian	http://ftp.ebi.ac.uk/pub/databases/gwas/summary_statistics/GCST90202001-GCST90203000/GCST90202422	36635386
GCST90202307	4-hydroxycoumarin levels	4-hydroxycoumarin measurement	68 East Asian	http://ftp.ebi.ac.uk/pub/databases/gwas/summary_statistics/GCST90202001-GCST90203000/GCST90202307	36635386
GCST90203301	4-hydroxycoumarin levels	4-hydroxycoumarin measurement	78 South Asian	http://ftp.ebi.ac.uk/pub/databases/gwas/summary_statistics/GCST90203001-GCST90204000/GCST90203301	36635386
GCST90199862	4-hydroxycoumarin levels	4-hydroxycoumarin measurement	6944 European	http://ftp.ebi.ac.uk/pub/databases/gwas/summary_statistics/GCST90199001-GCST90200000/GCST90199862	36635386
GCST90201268	4-hydroxycoumarin levels	4-hydroxycoumarin measurement	48 African unspecified	http://ftp.ebi.ac.uk/pub/databases/gwas/summary_statistics/GCST90201001-GCST90202000/GCST90201268	36635386
GCST90201319	4-hydroxyglutamate levels	4-hydroxyglutamate measurement	53 African unspecified	http://ftp.ebi.ac.uk/pub/databases/gwas/summary_statistics/GCST90201001-GCST90202000/GCST90201319	36635386
GCST90202340	4-hydroxyglutamate levels	4-hydroxyglutamate measurement	94 East Asian	http://ftp.ebi.ac.uk/pub/databases/gwas/summary_statistics/GCST90202001-GCST90203000/GCST90202340	36635386
GCST90199890	4-hydroxyglutamate levels	4-hydroxyglutamate measurement	7226 European	http://ftp.ebi.ac.uk/pub/databases/gwas/summary_statistics/GCST90199001-GCST90200000/GCST90199890	36635386
GCST90203339	4-hydroxyglutamate levels	4-hydroxyglutamate measurement	95 South Asian	http://ftp.ebi.ac.uk/pub/databases/gwas/summary_statistics/GCST90203001-GCST90204000/GCST90203339	36635386
GCST90203245	4-hydroxyhippurate levels	4-hydroxyhippurate measurement	108 South Asian	http://ftp.ebi.ac.uk/pub/databases/gwas/summary_statistics/GCST90203001-GCST90204000/GCST90203245	36635386
GCST90202189	4-hydroxyhippurate levels	4-hydroxyhippurate measurement	104 East Asian	http://ftp.ebi.ac.uk/pub/databases/gwas/summary_statistics/GCST90202001-GCST90203000/GCST90202189	36635386
GCST90199765	4-hydroxyhippurate levels	4-hydroxyhippurate measurement	8259 European	http://ftp.ebi.ac.uk/pub/databases/gwas/summary_statistics/GCST90199001-GCST90200000/GCST90199765	36635386
GCST90201171	4-hydroxyhippurate levels	4-hydroxyhippurate measurement	60 African unspecified	http://ftp.ebi.ac.uk/pub/databases/gwas/summary_statistics/GCST90201001-GCST90202000/GCST90201171	36635386
GCST90202772	4-hydroxyphenylacetate levels	4-hydroxyphenylacetate measurement	99 East Asian	http://ftp.ebi.ac.uk/pub/databases/gwas/summary_statistics/GCST90202001-GCST90203000/GCST90202772	36635386
GCST90200338	4-hydroxyphenylacetate levels	4-hydroxyphenylacetate measurement	7906 European	http://ftp.ebi.ac.uk/pub/databases/gwas/summary_statistics/GCST90200001-GCST90201000/GCST90200338	36635386
GCST90203764	4-hydroxyphenylacetate levels	4-hydroxyphenylacetate measurement	103 South Asian	http://ftp.ebi.ac.uk/pub/databases/gwas/summary_statistics/GCST90203001-GCST90204000/GCST90203764	36635386
GCST90201739	4-hydroxyphenylacetate levels	4-hydroxyphenylacetate measurement	58 African unspecified	http://ftp.ebi.ac.uk/pub/databases/gwas/summary_statistics/GCST90201001-GCST90202000/GCST90201739	36635386
GCST90200027	4-hydroxyphenylacetoylcarnitine levels	metabolite measurement	7523 European	http://ftp.ebi.ac.uk/pub/databases/gwas/summary_statistics/GCST90200001-GCST90201000/GCST90200027	36635386
GCST90201426	4-hydroxyphenylacetoylcarnitine levels	metabolite measurement	46 African unspecified	http://ftp.ebi.ac.uk/pub/databases/gwas/summary_statistics/GCST90201001-GCST90202000/GCST90201426	36635386
GCST90203458	4-hydroxyphenylacetoylcarnitine levels	metabolite measurement	92 South Asian	http://ftp.ebi.ac.uk/pub/databases/gwas/summary_statistics/GCST90203001-GCST90204000/GCST90203458	36635386
GCST90202470	4-hydroxyphenylacetoylcarnitine levels	metabolite measurement	90 East Asian	http://ftp.ebi.ac.uk/pub/databases/gwas/summary_statistics/GCST90202001-GCST90203000/GCST90202470	36635386
GCST90201509	4-hydroxyphenylacetylglutamine levels	4-hydroxyphenylacetylglutamine measurement	56 African unspecified	http://ftp.ebi.ac.uk/pub/databases/gwas/summary_statistics/GCST90201001-GCST90202000/GCST90201509	36635386
GCST90203550	4-hydroxyphenylacetylglutamine levels	4-hydroxyphenylacetylglutamine measurement	102 South Asian	http://ftp.ebi.ac.uk/pub/databases/gwas/summary_statistics/GCST90203001-GCST90204000/GCST90203550	36635386
GCST90202540	4-hydroxyphenylacetylglutamine levels	4-hydroxyphenylacetylglutamine measurement	92 East Asian	http://ftp.ebi.ac.uk/pub/databases/gwas/summary_statistics/GCST90202001-GCST90203000/GCST90202540	36635386
GCST90200106	4-hydroxyphenylacetylglutamine levels	4-hydroxyphenylacetylglutamine measurement	7752 European	http://ftp.ebi.ac.uk/pub/databases/gwas/summary_statistics/GCST90200001-GCST90201000/GCST90200106	36635386
GCST90202754	4-hydroxyphenylpyruvate levels	4-hydroxyphenylpyruvate measurement	96 East Asian	http://ftp.ebi.ac.uk/pub/databases/gwas/summary_statistics/GCST90202001-GCST90203000/GCST90202754	36635386
GCST90203744	4-hydroxyphenylpyruvate levels	4-hydroxyphenylpyruvate measurement	103 South Asian	http://ftp.ebi.ac.uk/pub/databases/gwas/summary_statistics/GCST90203001-GCST90204000/GCST90203744	36635386
GCST90201716	4-hydroxyphenylpyruvate levels	4-hydroxyphenylpyruvate measurement	51 African unspecified	http://ftp.ebi.ac.uk/pub/databases/gwas/summary_statistics/GCST90201001-GCST90202000/GCST90201716	36635386
GCST90200300	4-hydroxyphenylpyruvate levels	4-hydroxyphenylpyruvate measurement	7813 European	http://ftp.ebi.ac.uk/pub/databases/gwas/summary_statistics/GCST90200001-GCST90201000/GCST90200300	36635386
GCST90199999	4-methoxyphenol sulfate levels	4-methoxyphenol sulfate measurement	7500 European	http://ftp.ebi.ac.uk/pub/databases/gwas/summary_statistics/GCST90199001-GCST90200000/GCST90199999	36635386
GCST90201401	4-methoxyphenol sulfate levels	4-methoxyphenol sulfate measurement	58 African unspecified	http://ftp.ebi.ac.uk/pub/databases/gwas/summary_statistics/GCST90201001-GCST90202000/GCST90201401	36635386
GCST90203449	4-methoxyphenol sulfate levels	4-methoxyphenol sulfate measurement	104 South Asian	http://ftp.ebi.ac.uk/pub/databases/gwas/summary_statistics/GCST90203001-GCST90204000/GCST90203449	36635386
GCST90202435	4-methoxyphenol sulfate levels	4-methoxyphenol sulfate measurement	95 East Asian	http://ftp.ebi.ac.uk/pub/databases/gwas/summary_statistics/GCST90202001-GCST90203000/GCST90202435	36635386
GCST90201048	4-methyl-2-oxopentanoate levels	4-methyl-2-oxopentanoate measurement	59 African unspecified	http://ftp.ebi.ac.uk/pub/databases/gwas/summary_statistics/GCST90201001-GCST90202000/GCST90201048	36635386
GCST90199655	4-methyl-2-oxopentanoate levels	4-methyl-2-oxopentanoate measurement	8255 European	http://ftp.ebi.ac.uk/pub/databases/gwas/summary_statistics/GCST90199001-GCST90200000/GCST90199655	36635386
GCST90203134	4-methyl-2-oxopentanoate levels	4-methyl-2-oxopentanoate measurement	108 South Asian	http://ftp.ebi.ac.uk/pub/databases/gwas/summary_statistics/GCST90203001-GCST90204000/GCST90203134	36635386
GCST90202089	4-methyl-2-oxopentanoate levels	4-methyl-2-oxopentanoate measurement	104 East Asian	http://ftp.ebi.ac.uk/pub/databases/gwas/summary_statistics/GCST90202001-GCST90203000/GCST90202089	36635386
GCST90201017	4-methyl-2-oxopentanoate to 3-methyl-2-oxobutyrate ratio	metabolite ratio	8224 European	http://ftp.ebi.ac.uk/pub/databases/gwas/summary_statistics/GCST90201001-GCST90202000/GCST90201017	36635386
GCST90199939	4-methylcatechol sulfate levels	4-methylcatechol sulfate measurement	8229 European	http://ftp.ebi.ac.uk/pub/databases/gwas/summary_statistics/GCST90199001-GCST90200000/GCST90199939	36635386
GCST90203377	4-methylcatechol sulfate levels	4-methylcatechol sulfate measurement	107 South Asian	http://ftp.ebi.ac.uk/pub/databases/gwas/summary_statistics/GCST90203001-GCST90204000/GCST90203377	36635386
GCST90202381	4-methylcatechol sulfate levels	4-methylcatechol sulfate measurement	102 East Asian	http://ftp.ebi.ac.uk/pub/databases/gwas/summary_statistics/GCST90202001-GCST90203000/GCST90202381	36635386
GCST90201346	4-methylcatechol sulfate levels	4-methylcatechol sulfate measurement	60 African unspecified	http://ftp.ebi.ac.uk/pub/databases/gwas/summary_statistics/GCST90201001-GCST90202000/GCST90201346	36635386
GCST90199989	4-methylguaiacol sulfate levels	4-methylguaiacol sulfate measurement	7141 European	http://ftp.ebi.ac.uk/pub/databases/gwas/summary_statistics/GCST90199001-GCST90200000/GCST90199989	36635386
GCST90203425	4-methylguaiacol sulfate levels	4-methylguaiacol sulfate measurement	81 South Asian	http://ftp.ebi.ac.uk/pub/databases/gwas/summary_statistics/GCST90203001-GCST90204000/GCST90203425	36635386
GCST90201393	4-methylguaiacol sulfate levels	4-methylguaiacol sulfate measurement	52 African unspecified	http://ftp.ebi.ac.uk/pub/databases/gwas/summary_statistics/GCST90201001-GCST90202000/GCST90201393	36635386
GCST90202430	4-methylguaiacol sulfate levels	4-methylguaiacol sulfate measurement	79 East Asian	http://ftp.ebi.ac.uk/pub/databases/gwas/summary_statistics/GCST90202001-GCST90203000/GCST90202430	36635386
GCST90202658	4-methylhexanoylglutamine levels	4-methylhexanoylglutamine measurement	59 East Asian	http://ftp.ebi.ac.uk/pub/databases/gwas/summary_statistics/GCST90202001-GCST90203000/GCST90202658	36635386
GCST90200223	4-methylhexanoylglutamine levels	4-methylhexanoylglutamine measurement	5576 European	http://ftp.ebi.ac.uk/pub/databases/gwas/summary_statistics/GCST90200001-GCST90201000/GCST90200223	36635386
GCST90203657	4-methylhexanoylglutamine levels	4-methylhexanoylglutamine measurement	63 South Asian	http://ftp.ebi.ac.uk/pub/databases/gwas/summary_statistics/GCST90203001-GCST90204000/GCST90203657	36635386
GCST90201311	4-oxo-retinoic acid levels	blood 4-oxo-retinoic acid measurement	52 African unspecified	http://ftp.ebi.ac.uk/pub/databases/gwas/summary_statistics/GCST90201001-GCST90202000/GCST90201311	36635386
GCST90202325	4-oxo-retinoic acid levels	blood 4-oxo-retinoic acid measurement	96 East Asian	http://ftp.ebi.ac.uk/pub/databases/gwas/summary_statistics/GCST90202001-GCST90203000/GCST90202325	36635386
GCST90199894	4-oxo-retinoic acid levels	blood 4-oxo-retinoic acid measurement	7514 European	http://ftp.ebi.ac.uk/pub/databases/gwas/summary_statistics/GCST90199001-GCST90200000/GCST90199894	36635386
GCST90203353	4-oxo-retinoic acid levels	blood 4-oxo-retinoic acid measurement	89 South Asian	http://ftp.ebi.ac.uk/pub/databases/gwas/summary_statistics/GCST90203001-GCST90204000/GCST90203353	36635386
GCST90199982	4-vinylguaiacol sulfate levels	4-vinylguaiacol sulfate measurement	7592 European	http://ftp.ebi.ac.uk/pub/databases/gwas/summary_statistics/GCST90199001-GCST90200000/GCST90199982	36635386
GCST90203443	4-vinylguaiacol sulfate levels	4-vinylguaiacol sulfate measurement	87 South Asian	http://ftp.ebi.ac.uk/pub/databases/gwas/summary_statistics/GCST90203001-GCST90204000/GCST90203443	36635386
GCST90201398	4-vinylguaiacol sulfate levels	4-vinylguaiacol sulfate measurement	55 African unspecified	http://ftp.ebi.ac.uk/pub/databases/gwas/summary_statistics/GCST90201001-GCST90202000/GCST90201398	36635386
GCST90202443	4-vinylguaiacol sulfate levels	4-vinylguaiacol sulfate measurement	93 East Asian	http://ftp.ebi.ac.uk/pub/databases/gwas/summary_statistics/GCST90202001-GCST90203000/GCST90202443	36635386
GCST90203274	4-vinylphenol sulfate levels	4-vinylphenol sulfate measurement	108 South Asian	http://ftp.ebi.ac.uk/pub/databases/gwas/summary_statistics/GCST90203001-GCST90204000/GCST90203274	36635386
GCST90202258	4-vinylphenol sulfate levels	4-vinylphenol sulfate measurement	103 East Asian	http://ftp.ebi.ac.uk/pub/databases/gwas/summary_statistics/GCST90202001-GCST90203000/GCST90202258	36635386
GCST90199824	4-vinylphenol sulfate levels	4-vinylphenol sulfate measurement	8280 European	http://ftp.ebi.ac.uk/pub/databases/gwas/summary_statistics/GCST90199001-GCST90200000/GCST90199824	36635386
GCST90201232	4-vinylphenol sulfate levels	4-vinylphenol sulfate measurement	60 African unspecified	http://ftp.ebi.ac.uk/pub/databases/gwas/summary_statistics/GCST90201001-GCST90202000/GCST90201232	36635386
GCST90201284	5-(galactosylhydroxy)-L-lysine levels	5-(galactosylhydroxy)-L-lysine measurement	49 African unspecified	http://ftp.ebi.ac.uk/pub/databases/gwas/summary_statistics/GCST90201001-GCST90202000/GCST90201284	36635386
GCST90199881	5-(galactosylhydroxy)-L-lysine levels	5-(galactosylhydroxy)-L-lysine measurement	6898 European	http://ftp.ebi.ac.uk/pub/databases/gwas/summary_statistics/GCST90199001-GCST90200000/GCST90199881	36635386
GCST90203351	5-(galactosylhydroxy)-L-lysine levels	5-(galactosylhydroxy)-L-lysine measurement	82 South Asian	http://ftp.ebi.ac.uk/pub/databases/gwas/summary_statistics/GCST90203001-GCST90204000/GCST90203351	36635386
GCST90202782	5,6-dihydrothymine levels	5,6-dihydrothymine measurement	103 East Asian	http://ftp.ebi.ac.uk/pub/databases/gwas/summary_statistics/GCST90202001-GCST90203000/GCST90202782	36635386
GCST90200339	5,6-dihydrothymine levels	5,6-dihydrothymine measurement	8219 European	http://ftp.ebi.ac.uk/pub/databases/gwas/summary_statistics/GCST90200001-GCST90201000/GCST90200339	36635386
GCST90203768	5,6-dihydrothymine levels	5,6-dihydrothymine measurement	106 South Asian	http://ftp.ebi.ac.uk/pub/databases/gwas/summary_statistics/GCST90203001-GCST90204000/GCST90203768	36635386
GCST90201731	5,6-dihydrothymine levels	5,6-dihydrothymine measurement	59 African unspecified	http://ftp.ebi.ac.uk/pub/databases/gwas/summary_statistics/GCST90201001-GCST90202000/GCST90201731	36635386
GCST90202192	5,6-dihydrouridine levels	5,6-dihydrouridine measurement	103 East Asian	http://ftp.ebi.ac.uk/pub/databases/gwas/summary_statistics/GCST90202001-GCST90203000/GCST90202192	36635386
GCST90199767	5,6-dihydrouridine levels	5,6-dihydrouridine measurement	8210 European	http://ftp.ebi.ac.uk/pub/databases/gwas/summary_statistics/GCST90199001-GCST90200000/GCST90199767	36635386
GCST90201174	5,6-dihydrouridine levels	5,6-dihydrouridine measurement	59 African unspecified	http://ftp.ebi.ac.uk/pub/databases/gwas/summary_statistics/GCST90201001-GCST90202000/GCST90201174	36635386
GCST90202196	5-acetylamino-6-amino-3-methyluracil levels	5-acetylamino-6-amino-3-methyluracil measurement	95 East Asian	http://ftp.ebi.ac.uk/pub/databases/gwas/summary_statistics/GCST90202001-GCST90203000/GCST90202196	36635386
GCST90203225	5-acetylamino-6-amino-3-methyluracil levels	5-acetylamino-6-amino-3-methyluracil measurement	104 South Asian	http://ftp.ebi.ac.uk/pub/databases/gwas/summary_statistics/GCST90203001-GCST90204000/GCST90203225	36635386
GCST90199760	5-acetylamino-6-amino-3-methyluracil levels	5-acetylamino-6-amino-3-methyluracil measurement	8006 European	http://ftp.ebi.ac.uk/pub/databases/gwas/summary_statistics/GCST90199001-GCST90200000/GCST90199760	36635386
GCST90201162	5-acetylamino-6-amino-3-methyluracil levels	5-acetylamino-6-amino-3-methyluracil measurement	54 African unspecified	http://ftp.ebi.ac.uk/pub/databases/gwas/summary_statistics/GCST90201001-GCST90202000/GCST90201162	36635386
GCST90200680	5-acetylamino-6-formylamino-3-methyluracil levels	5-acetylamino-6-formylamino-3-methyluracil measurement	7599 European	http://ftp.ebi.ac.uk/pub/databases/gwas/summary_statistics/GCST90200001-GCST90201000/GCST90200680	36635386
GCST90203228	5-acetylamino-6-formylamino-3-methyluracil levels	5-acetylamino-6-formylamino-3-methyluracil measurement	96 South Asian	http://ftp.ebi.ac.uk/pub/databases/gwas/summary_statistics/GCST90203001-GCST90204000/GCST90203228	36635386
GCST90202204	5-acetylamino-6-formylamino-3-methyluracil levels	5-acetylamino-6-formylamino-3-methyluracil measurement	90 East Asian	http://ftp.ebi.ac.uk/pub/databases/gwas/summary_statistics/GCST90202001-GCST90203000/GCST90202204	36635386
GCST90201161	5-acetylamino-6-formylamino-3-methyluracil levels	5-acetylamino-6-formylamino-3-methyluracil measurement	40 African unspecified	http://ftp.ebi.ac.uk/pub/databases/gwas/summary_statistics/GCST90201001-GCST90202000/GCST90201161	36635386
GCST90202289	5alpha-androstan-3alpha,17alpha-diol monosulfate levels	5alpha-androstan-3alpha,17alpha-diol monosulfate measurement	94 East Asian	http://ftp.ebi.ac.uk/pub/databases/gwas/summary_statistics/GCST90202001-GCST90203000/GCST90202289	36635386
GCST90199850	5alpha-androstan-3alpha,17alpha-diol monosulfate levels	5alpha-androstan-3alpha,17alpha-diol monosulfate measurement	5524 European	http://ftp.ebi.ac.uk/pub/databases/gwas/summary_statistics/GCST90199001-GCST90200000/GCST90199850	36635386
GCST90201256	5alpha-androstan-3alpha,17alpha-diol monosulfate levels	5alpha-androstan-3alpha,17alpha-diol monosulfate measurement	36 African unspecified	http://ftp.ebi.ac.uk/pub/databases/gwas/summary_statistics/GCST90201001-GCST90202000/GCST90201256	36635386
GCST90203316	5alpha-androstan-3alpha,17beta-diol disulfate levels	5alpha-androstan-3alpha,17beta-diol disulfate measurement	72 South Asian	http://ftp.ebi.ac.uk/pub/databases/gwas/summary_statistics/GCST90203001-GCST90204000/GCST90203316	36635386
GCST90202302	5alpha-androstan-3alpha,17beta-diol disulfate levels	5alpha-androstan-3alpha,17beta-diol disulfate measurement	86 East Asian	http://ftp.ebi.ac.uk/pub/databases/gwas/summary_statistics/GCST90202001-GCST90203000/GCST90202302	36635386
GCST90199859	5alpha-androstan-3alpha,17beta-diol disulfate levels	5alpha-androstan-3alpha,17beta-diol disulfate measurement	5082 European	http://ftp.ebi.ac.uk/pub/databases/gwas/summary_statistics/GCST90199001-GCST90200000/GCST90199859	36635386
GCST90201263	5alpha-androstan-3alpha,17beta-diol disulfate levels	5alpha-androstan-3alpha,17beta-diol disulfate measurement	44 African unspecified	http://ftp.ebi.ac.uk/pub/databases/gwas/summary_statistics/GCST90201001-GCST90202000/GCST90201263	36635386
GCST90203303	5alpha-androstan-3alpha,17beta-diol monosulfate (1) levels	5alpha-androstan-3alpha,17beta-diol monosulfate (1) measurement	98 South Asian	http://ftp.ebi.ac.uk/pub/databases/gwas/summary_statistics/GCST90203001-GCST90204000/GCST90203303	36635386
GCST90202303	5alpha-androstan-3alpha,17beta-diol monosulfate (1) levels	5alpha-androstan-3alpha,17beta-diol monosulfate (1) measurement	102 East Asian	http://ftp.ebi.ac.uk/pub/databases/gwas/summary_statistics/GCST90202001-GCST90203000/GCST90202303	36635386
GCST90199858	5alpha-androstan-3alpha,17beta-diol monosulfate (1) levels	5alpha-androstan-3alpha,17beta-diol monosulfate (1) measurement	7608 European	http://ftp.ebi.ac.uk/pub/databases/gwas/summary_statistics/GCST90199001-GCST90200000/GCST90199858	36635386
GCST90201265	5alpha-androstan-3alpha,17beta-diol monosulfate (1) levels	5alpha-androstan-3alpha,17beta-diol monosulfate (1) measurement	59 African unspecified	http://ftp.ebi.ac.uk/pub/databases/gwas/summary_statistics/GCST90201001-GCST90202000/GCST90201265	36635386
GCST90199983	5alpha-androstan-3alpha,17beta-diol monosulfate (2) levels	5alpha-androstan-3alpha,17beta-diol monosulfate (2) measurement	5920 European	http://ftp.ebi.ac.uk/pub/databases/gwas/summary_statistics/GCST90199001-GCST90200000/GCST90199983	36635386
GCST90203419	5alpha-androstan-3alpha,17beta-diol monosulfate (2) levels	5alpha-androstan-3alpha,17beta-diol monosulfate (2) measurement	72 South Asian	http://ftp.ebi.ac.uk/pub/databases/gwas/summary_statistics/GCST90203001-GCST90204000/GCST90203419	36635386
GCST90201397	5alpha-androstan-3alpha,17beta-diol monosulfate (2) levels	5alpha-androstan-3alpha,17beta-diol monosulfate (2) measurement	51 African unspecified	http://ftp.ebi.ac.uk/pub/databases/gwas/summary_statistics/GCST90201001-GCST90202000/GCST90201397	36635386
GCST90202424	5alpha-androstan-3alpha,17beta-diol monosulfate (2) levels	5alpha-androstan-3alpha,17beta-diol monosulfate (2) measurement	83 East Asian	http://ftp.ebi.ac.uk/pub/databases/gwas/summary_statistics/GCST90202001-GCST90203000/GCST90202424	36635386
GCST90203307	5alpha-androstan-3beta,17alpha-diol disulfate levels	5alpha-androstan-3beta,17alpha-diol disulfate measurement	90 South Asian	http://ftp.ebi.ac.uk/pub/databases/gwas/summary_statistics/GCST90203001-GCST90204000/GCST90203307	36635386
GCST90202285	5alpha-androstan-3beta,17alpha-diol disulfate levels	5alpha-androstan-3beta,17alpha-diol disulfate measurement	97 East Asian	http://ftp.ebi.ac.uk/pub/databases/gwas/summary_statistics/GCST90202001-GCST90203000/GCST90202285	36635386
GCST90199852	5alpha-androstan-3beta,17alpha-diol disulfate levels	5alpha-androstan-3beta,17alpha-diol disulfate measurement	7103 European	http://ftp.ebi.ac.uk/pub/databases/gwas/summary_statistics/GCST90199001-GCST90200000/GCST90199852	36635386
GCST90201261	5alpha-androstan-3beta,17alpha-diol disulfate levels	5alpha-androstan-3beta,17alpha-diol disulfate measurement	50 African unspecified	http://ftp.ebi.ac.uk/pub/databases/gwas/summary_statistics/GCST90201001-GCST90202000/GCST90201261	36635386
GCST90202286	5alpha-androstan-3beta,17beta-diol disulfate levels	5alpha-androstan-3beta,17beta-diol disulfate measurement	103 East Asian	http://ftp.ebi.ac.uk/pub/databases/gwas/summary_statistics/GCST90202001-GCST90203000/GCST90202286	36635386
GCST90199835	5alpha-androstan-3beta,17beta-diol disulfate levels	5alpha-androstan-3beta,17beta-diol disulfate measurement	8199 European	http://ftp.ebi.ac.uk/pub/databases/gwas/summary_statistics/GCST90199001-GCST90200000/GCST90199835	36635386
GCST90201246	5alpha-androstan-3beta,17beta-diol disulfate levels	5alpha-androstan-3beta,17beta-diol disulfate measurement	60 African unspecified	http://ftp.ebi.ac.uk/pub/databases/gwas/summary_statistics/GCST90201001-GCST90202000/GCST90201246	36635386
GCST90202300	5alpha-androstan-3beta,17beta-diol monosulfate (2) levels	5alpha-androstan-3beta,17beta-diol monosulfate (2) measurement	98 East Asian	http://ftp.ebi.ac.uk/pub/databases/gwas/summary_statistics/GCST90202001-GCST90203000/GCST90202300	36635386
GCST90199855	5alpha-androstan-3beta,17beta-diol monosulfate (2) levels	5alpha-androstan-3beta,17beta-diol monosulfate (2) measurement	7066 European	http://ftp.ebi.ac.uk/pub/databases/gwas/summary_statistics/GCST90199001-GCST90200000/GCST90199855	36635386
GCST90201266	5alpha-androstan-3beta,17beta-diol monosulfate (2) levels	5alpha-androstan-3beta,17beta-diol monosulfate (2) measurement	54 African unspecified	http://ftp.ebi.ac.uk/pub/databases/gwas/summary_statistics/GCST90201001-GCST90202000/GCST90201266	36635386
GCST90203311	5alpha-pregnan-3beta,20alpha-diol disulfate levels	5alpha-pregnan-diol disulfate measurement	104 South Asian	http://ftp.ebi.ac.uk/pub/databases/gwas/summary_statistics/GCST90203001-GCST90204000/GCST90203311	36635386
GCST90202287	5alpha-pregnan-3beta,20alpha-diol disulfate levels	5alpha-pregnan-diol disulfate measurement	102 East Asian	http://ftp.ebi.ac.uk/pub/databases/gwas/summary_statistics/GCST90202001-GCST90203000/GCST90202287	36635386
GCST90199838	5alpha-pregnan-3beta,20alpha-diol disulfate levels	5alpha-pregnan-diol disulfate measurement	8130 European	http://ftp.ebi.ac.uk/pub/databases/gwas/summary_statistics/GCST90199001-GCST90200000/GCST90199838	36635386
GCST90201248	5alpha-pregnan-3beta,20alpha-diol disulfate levels	5alpha-pregnan-diol disulfate measurement	59 African unspecified	http://ftp.ebi.ac.uk/pub/databases/gwas/summary_statistics/GCST90201001-GCST90202000/GCST90201248	36635386
GCST90202298	5alpha-pregnan-3beta,20alpha-diol monosulfate (2) levels	5alpha-pregnan-3beta,20alpha-diol monosulfate (2) measurement	101 East Asian	http://ftp.ebi.ac.uk/pub/databases/gwas/summary_statistics/GCST90202001-GCST90203000/GCST90202298	36635386
GCST90199854	5alpha-pregnan-3beta,20alpha-diol monosulfate (2) levels	5alpha-pregnan-3beta,20alpha-diol monosulfate (2) measurement	8028 European	http://ftp.ebi.ac.uk/pub/databases/gwas/summary_statistics/GCST90199001-GCST90200000/GCST90199854	36635386
GCST90201262	5alpha-pregnan-3beta,20alpha-diol monosulfate (2) levels	5alpha-pregnan-3beta,20alpha-diol monosulfate (2) measurement	58 African unspecified	http://ftp.ebi.ac.uk/pub/databases/gwas/summary_statistics/GCST90201001-GCST90202000/GCST90201262	36635386
GCST90203319	5alpha-pregnan-3beta,20beta-diol monosulfate (1) levels	5alpha-pregnan-3beta,20beta-diol monosulfate (1) measurement	100 South Asian	http://ftp.ebi.ac.uk/pub/databases/gwas/summary_statistics/GCST90203001-GCST90204000/GCST90203319	36635386
GCST90202296	5alpha-pregnan-3beta,20beta-diol monosulfate (1) levels	5alpha-pregnan-3beta,20beta-diol monosulfate (1) measurement	102 East Asian	http://ftp.ebi.ac.uk/pub/databases/gwas/summary_statistics/GCST90202001-GCST90203000/GCST90202296	36635386
GCST90199853	5alpha-pregnan-3beta,20beta-diol monosulfate (1) levels	5alpha-pregnan-3beta,20beta-diol monosulfate (1) measurement	7772 European	http://ftp.ebi.ac.uk/pub/databases/gwas/summary_statistics/GCST90199001-GCST90200000/GCST90199853	36635386
GCST90201258	5alpha-pregnan-3beta,20beta-diol monosulfate (1) levels	5alpha-pregnan-3beta,20beta-diol monosulfate (1) measurement	56 African unspecified	http://ftp.ebi.ac.uk/pub/databases/gwas/summary_statistics/GCST90201001-GCST90202000/GCST90201258	36635386
GCST90203314	5alpha-pregnan-diol disulfate levels	5alpha-pregnan-diol disulfate measurement	71 South Asian	http://ftp.ebi.ac.uk/pub/databases/gwas/summary_statistics/GCST90203001-GCST90204000/GCST90203314	36635386
GCST90202293	5alpha-pregnan-diol disulfate levels	5alpha-pregnan-diol disulfate measurement	72 East Asian	http://ftp.ebi.ac.uk/pub/databases/gwas/summary_statistics/GCST90202001-GCST90203000/GCST90202293	36635386
GCST90199857	5alpha-pregnan-diol disulfate levels	5alpha-pregnan-diol disulfate measurement	4110 European	http://ftp.ebi.ac.uk/pub/databases/gwas/summary_statistics/GCST90199001-GCST90200000/GCST90199857	36635386
GCST90201260	5alpha-pregnan-diol disulfate levels	5alpha-pregnan-diol disulfate measurement	30 African unspecified	http://ftp.ebi.ac.uk/pub/databases/gwas/summary_statistics/GCST90201001-GCST90202000/GCST90201260	36635386
GCST90202151	5-dodecenoate (12:1n7) levels	5-dodecenoate 12:1n7 measurement	103 East Asian	http://ftp.ebi.ac.uk/pub/databases/gwas/summary_statistics/GCST90202001-GCST90203000/GCST90202151	36635386
GCST90199723	5-dodecenoate (12:1n7) levels	5-dodecenoate 12:1n7 measurement	8248 European	http://ftp.ebi.ac.uk/pub/databases/gwas/summary_statistics/GCST90199001-GCST90200000/GCST90199723	36635386
GCST90201123	5-dodecenoate (12:1n7) levels	5-dodecenoate 12:1n7 measurement	59 African unspecified	http://ftp.ebi.ac.uk/pub/databases/gwas/summary_statistics/GCST90201001-GCST90202000/GCST90201123	36635386
GCST90201561	5-dodecenoylcarnitine (C12:1) levels	5-dodecenoylcarnitine (C12:1) measurement	55 African unspecified	http://ftp.ebi.ac.uk/pub/databases/gwas/summary_statistics/GCST90201001-GCST90202000/GCST90201561	36635386
GCST90202608	5-dodecenoylcarnitine (C12:1) levels	5-dodecenoylcarnitine (C12:1) measurement	99 East Asian	http://ftp.ebi.ac.uk/pub/databases/gwas/summary_statistics/GCST90202001-GCST90203000/GCST90202608	36635386
GCST90203583	5-dodecenoylcarnitine (C12:1) levels	5-dodecenoylcarnitine (C12:1) measurement	97 South Asian	http://ftp.ebi.ac.uk/pub/databases/gwas/summary_statistics/GCST90203001-GCST90204000/GCST90203583	36635386
GCST90200151	5-dodecenoylcarnitine (C12:1) levels	5-dodecenoylcarnitine (C12:1) measurement	7899 European	http://ftp.ebi.ac.uk/pub/databases/gwas/summary_statistics/GCST90200001-GCST90201000/GCST90200151	36635386
GCST90201637	5-hydroxy-2-methylpyridine sulfate levels	5-hydroxy-2-methylpyridine sulfate measurement	42 African unspecified	http://ftp.ebi.ac.uk/pub/databases/gwas/summary_statistics/GCST90201001-GCST90202000/GCST90201637	36635386
GCST90202659	5-hydroxy-2-methylpyridine sulfate levels	5-hydroxy-2-methylpyridine sulfate measurement	79 East Asian	http://ftp.ebi.ac.uk/pub/databases/gwas/summary_statistics/GCST90202001-GCST90203000/GCST90202659	36635386
GCST90200226	5-hydroxy-2-methylpyridine sulfate levels	5-hydroxy-2-methylpyridine sulfate measurement	6977 European	http://ftp.ebi.ac.uk/pub/databases/gwas/summary_statistics/GCST90200001-GCST90201000/GCST90200226	36635386
GCST90203666	5-hydroxy-2-methylpyridine sulfate levels	5-hydroxy-2-methylpyridine sulfate measurement	69 South Asian	http://ftp.ebi.ac.uk/pub/databases/gwas/summary_statistics/GCST90203001-GCST90204000/GCST90203666	36635386
GCST90201105	5-hydroxyhexanoate levels	5-hydroxyhexanoate measurement	51 African unspecified	http://ftp.ebi.ac.uk/pub/databases/gwas/summary_statistics/GCST90201001-GCST90202000/GCST90201105	36635386
GCST90202139	5-hydroxyhexanoate levels	5-hydroxyhexanoate measurement	79 East Asian	http://ftp.ebi.ac.uk/pub/databases/gwas/summary_statistics/GCST90202001-GCST90203000/GCST90202139	36635386
GCST90199702	5-hydroxyhexanoate levels	5-hydroxyhexanoate measurement	7097 European	http://ftp.ebi.ac.uk/pub/databases/gwas/summary_statistics/GCST90199001-GCST90200000/GCST90199702	36635386
GCST90203162	5-hydroxyhexanoate levels	5-hydroxyhexanoate measurement	89 South Asian	http://ftp.ebi.ac.uk/pub/databases/gwas/summary_statistics/GCST90203001-GCST90204000/GCST90203162	36635386
GCST90200050	5-hydroxyindole sulfate levels	5-hydroxyindole sulfate measurement	6163 European	http://ftp.ebi.ac.uk/pub/databases/gwas/summary_statistics/GCST90200001-GCST90201000/GCST90200050	36635386
GCST90201476	5-hydroxyindole sulfate levels	5-hydroxyindole sulfate measurement	51 African unspecified	http://ftp.ebi.ac.uk/pub/databases/gwas/summary_statistics/GCST90201001-GCST90202000/GCST90201476	36635386
GCST90203508	5-hydroxyindole sulfate levels	5-hydroxyindole sulfate measurement	76 South Asian	http://ftp.ebi.ac.uk/pub/databases/gwas/summary_statistics/GCST90203001-GCST90204000/GCST90203508	36635386
GCST90202510	5-hydroxyindole sulfate levels	5-hydroxyindole sulfate measurement	76 East Asian	http://ftp.ebi.ac.uk/pub/databases/gwas/summary_statistics/GCST90202001-GCST90203000/GCST90202510	36635386
GCST90201041	5-hydroxylysine levels	5-hydroxylysine measurement	58 African unspecified	http://ftp.ebi.ac.uk/pub/databases/gwas/summary_statistics/GCST90201001-GCST90202000/GCST90201041	36635386
GCST90202075	5-hydroxylysine levels	5-hydroxylysine measurement	100 East Asian	http://ftp.ebi.ac.uk/pub/databases/gwas/summary_statistics/GCST90202001-GCST90203000/GCST90202075	36635386
GCST90199634	5-hydroxylysine levels	5-hydroxylysine measurement	8128 European	http://ftp.ebi.ac.uk/pub/databases/gwas/summary_statistics/GCST90199001-GCST90200000/GCST90199634	36635386
GCST90200244	5-hydroxymethyl-2-furoylcarnitine levels	5-hydroxymethyl-2-furoylcarnitine measurement	4803 European	http://ftp.ebi.ac.uk/pub/databases/gwas/summary_statistics/GCST90200001-GCST90201000/GCST90200244	36635386
GCST90203662	5-hydroxymethyl-2-furoylcarnitine levels	5-hydroxymethyl-2-furoylcarnitine measurement	57 South Asian	http://ftp.ebi.ac.uk/pub/databases/gwas/summary_statistics/GCST90203001-GCST90204000/GCST90203662	36635386
GCST90202799	5-methylthioadenosine (mta) levels	5-methylthioadenosine (MTA) measurement	104 East Asian	http://ftp.ebi.ac.uk/pub/databases/gwas/summary_statistics/GCST90202001-GCST90203000/GCST90202799	36635386
GCST90203786	5-methylthioadenosine (mta) levels	5-methylthioadenosine (MTA) measurement	108 South Asian	http://ftp.ebi.ac.uk/pub/databases/gwas/summary_statistics/GCST90203001-GCST90204000/GCST90203786	36635386
GCST90200359	5-methylthioadenosine (mta) levels	5-methylthioadenosine (MTA) measurement	8210 European	http://ftp.ebi.ac.uk/pub/databases/gwas/summary_statistics/GCST90200001-GCST90201000/GCST90200359	36635386
GCST90201751	5-methylthioadenosine (mta) levels	5-methylthioadenosine (MTA) measurement	58 African unspecified	http://ftp.ebi.ac.uk/pub/databases/gwas/summary_statistics/GCST90201001-GCST90202000/GCST90201751	36635386
GCST90200801	5-methylthioadenosine (MTA) to phosphate ratio	metabolite ratio	8261 European	http://ftp.ebi.ac.uk/pub/databases/gwas/summary_statistics/GCST90200001-GCST90201000/GCST90200801	36635386
GCST90203249	5-methyluridine (ribothymidine) levels	5-methyluridine (ribothymidine) measurement	107 South Asian	http://ftp.ebi.ac.uk/pub/databases/gwas/summary_statistics/GCST90203001-GCST90204000/GCST90203249	36635386
GCST90202210	5-methyluridine (ribothymidine) levels	5-methyluridine (ribothymidine) measurement	104 East Asian	http://ftp.ebi.ac.uk/pub/databases/gwas/summary_statistics/GCST90202001-GCST90203000/GCST90202210	36635386
GCST90199783	5-methyluridine (ribothymidine) levels	5-methyluridine (ribothymidine) measurement	8168 European	http://ftp.ebi.ac.uk/pub/databases/gwas/summary_statistics/GCST90199001-GCST90200000/GCST90199783	36635386
GCST90201172	5-methyluridine (ribothymidine) levels	5-methyluridine (ribothymidine) measurement	60 African unspecified	http://ftp.ebi.ac.uk/pub/databases/gwas/summary_statistics/GCST90201001-GCST90202000/GCST90201172	36635386
GCST90202726	5-oxoproline levels	5-oxoproline measurement	103 East Asian	http://ftp.ebi.ac.uk/pub/databases/gwas/summary_statistics/GCST90202001-GCST90203000/GCST90202726	36635386
GCST90203715	5-oxoproline levels	5-oxoproline measurement	107 South Asian	http://ftp.ebi.ac.uk/pub/databases/gwas/summary_statistics/GCST90203001-GCST90204000/GCST90203715	36635386
GCST90201682	5-oxoproline levels	5-oxoproline measurement	60 African unspecified	http://ftp.ebi.ac.uk/pub/databases/gwas/summary_statistics/GCST90201001-GCST90202000/GCST90201682	36635386
GCST90200280	5-oxoproline levels	5-oxoproline measurement	8247 European	http://ftp.ebi.ac.uk/pub/databases/gwas/summary_statistics/GCST90200001-GCST90201000/GCST90200280	36635386
GCST90200788	5-oxoproline to citrate ratio	metabolite ratio	8256 European	http://ftp.ebi.ac.uk/pub/databases/gwas/summary_statistics/GCST90200001-GCST90201000/GCST90200788	36635386
GCST90201597	6-bromotryptophan levels	6-bromotryptophan measurement	60 African unspecified	http://ftp.ebi.ac.uk/pub/databases/gwas/summary_statistics/GCST90201001-GCST90202000/GCST90201597	36635386
GCST90200201	6-bromotryptophan levels	6-bromotryptophan measurement	8214 European	http://ftp.ebi.ac.uk/pub/databases/gwas/summary_statistics/GCST90200001-GCST90201000/GCST90200201	36635386
GCST90203629	6-bromotryptophan levels	6-bromotryptophan measurement	107 South Asian	http://ftp.ebi.ac.uk/pub/databases/gwas/summary_statistics/GCST90203001-GCST90204000/GCST90203629	36635386
GCST90200002	6-hydroxyindole sulfate levels	6-hydroxyindole sulfate measurement	8229 European	http://ftp.ebi.ac.uk/pub/databases/gwas/summary_statistics/GCST90200001-GCST90201000/GCST90200002	36635386
GCST90201402	6-hydroxyindole sulfate levels	6-hydroxyindole sulfate measurement	60 African unspecified	http://ftp.ebi.ac.uk/pub/databases/gwas/summary_statistics/GCST90201001-GCST90202000/GCST90201402	36635386
GCST90203448	6-hydroxyindole sulfate levels	6-hydroxyindole sulfate measurement	106 South Asian	http://ftp.ebi.ac.uk/pub/databases/gwas/summary_statistics/GCST90203001-GCST90204000/GCST90203448	36635386
GCST90202427	6-hydroxyindole sulfate levels	6-hydroxyindole sulfate measurement	102 East Asian	http://ftp.ebi.ac.uk/pub/databases/gwas/summary_statistics/GCST90202001-GCST90203000/GCST90202427	36635386
GCST90199949	6-oxopiperidine-2-carboxylate levels	6-oxopiperidine-2-carboxylate measurement	8032 European	http://ftp.ebi.ac.uk/pub/databases/gwas/summary_statistics/GCST90199001-GCST90200000/GCST90199949	36635386
GCST90203393	6-oxopiperidine-2-carboxylate levels	6-oxopiperidine-2-carboxylate measurement	100 South Asian	http://ftp.ebi.ac.uk/pub/databases/gwas/summary_statistics/GCST90203001-GCST90204000/GCST90203393	36635386
GCST90202396	6-oxopiperidine-2-carboxylate levels	6-oxopiperidine-2-carboxylate measurement	102 East Asian	http://ftp.ebi.ac.uk/pub/databases/gwas/summary_statistics/GCST90202001-GCST90203000/GCST90202396	36635386
GCST90201355	6-oxopiperidine-2-carboxylate levels	6-oxopiperidine-2-carboxylate measurement	59 African unspecified	http://ftp.ebi.ac.uk/pub/databases/gwas/summary_statistics/GCST90201001-GCST90202000/GCST90201355	36635386
GCST90203253	7-alpha-hydroxy-3-oxo-4-cholestenoate (7-hoca) levels	7-alpha-hydroxy-3-oxo-4-cholestenoate 7-Hoca measurement	108 South Asian	http://ftp.ebi.ac.uk/pub/databases/gwas/summary_statistics/GCST90203001-GCST90204000/GCST90203253	36635386
GCST90202226	7-alpha-hydroxy-3-oxo-4-cholestenoate (7-hoca) levels	7-alpha-hydroxy-3-oxo-4-cholestenoate 7-Hoca measurement	103 East Asian	http://ftp.ebi.ac.uk/pub/databases/gwas/summary_statistics/GCST90202001-GCST90203000/GCST90202226	36635386
GCST90199804	7-alpha-hydroxy-3-oxo-4-cholestenoate (7-hoca) levels	7-alpha-hydroxy-3-oxo-4-cholestenoate 7-Hoca measurement	8236 European	http://ftp.ebi.ac.uk/pub/databases/gwas/summary_statistics/GCST90199001-GCST90200000/GCST90199804	36635386
GCST90201213	7-alpha-hydroxy-3-oxo-4-cholestenoate (7-hoca) levels	7-alpha-hydroxy-3-oxo-4-cholestenoate 7-Hoca measurement	60 African unspecified	http://ftp.ebi.ac.uk/pub/databases/gwas/summary_statistics/GCST90201001-GCST90202000/GCST90201213	36635386
GCST90203248	7-methylguanine levels	7-methylguanine measurement	108 South Asian	http://ftp.ebi.ac.uk/pub/databases/gwas/summary_statistics/GCST90203001-GCST90204000/GCST90203248	36635386
GCST90202214	7-methylguanine levels	7-methylguanine measurement	104 East Asian	http://ftp.ebi.ac.uk/pub/databases/gwas/summary_statistics/GCST90202001-GCST90203000/GCST90202214	36635386
GCST90199771	7-methylguanine levels	7-methylguanine measurement	8239 European	http://ftp.ebi.ac.uk/pub/databases/gwas/summary_statistics/GCST90199001-GCST90200000/GCST90199771	36635386
GCST90201177	7-methylguanine levels	7-methylguanine measurement	59 African unspecified	http://ftp.ebi.ac.uk/pub/databases/gwas/summary_statistics/GCST90201001-GCST90202000/GCST90201177	36635386
GCST90202193	7-methylxanthine levels	7-methylxanthine measurement	94 East Asian	http://ftp.ebi.ac.uk/pub/databases/gwas/summary_statistics/GCST90202001-GCST90203000/GCST90202193	36635386
GCST90203224	7-methylxanthine levels	7-methylxanthine measurement	102 South Asian	http://ftp.ebi.ac.uk/pub/databases/gwas/summary_statistics/GCST90203001-GCST90204000/GCST90203224	36635386
GCST90199754	7-methylxanthine levels	7-methylxanthine measurement	8019 European	http://ftp.ebi.ac.uk/pub/databases/gwas/summary_statistics/GCST90199001-GCST90200000/GCST90199754	36635386
GCST90201155	7-methylxanthine levels	7-methylxanthine measurement	49 African unspecified	http://ftp.ebi.ac.uk/pub/databases/gwas/summary_statistics/GCST90201001-GCST90202000/GCST90201155	36635386
GCST90201588	8-methoxykynurenate levels	8-methoxykynurenate measurement	42 African unspecified	http://ftp.ebi.ac.uk/pub/databases/gwas/summary_statistics/GCST90201001-GCST90202000/GCST90201588	36635386
GCST90202619	8-methoxykynurenate levels	8-methoxykynurenate measurement	84 East Asian	http://ftp.ebi.ac.uk/pub/databases/gwas/summary_statistics/GCST90202001-GCST90203000/GCST90202619	36635386
GCST90200186	8-methoxykynurenate levels	8-methoxykynurenate measurement	6938 European	http://ftp.ebi.ac.uk/pub/databases/gwas/summary_statistics/GCST90200001-GCST90201000/GCST90200186	36635386
GCST90203621	8-methoxykynurenate levels	8-methoxykynurenate measurement	98 South Asian	http://ftp.ebi.ac.uk/pub/databases/gwas/summary_statistics/GCST90203001-GCST90204000/GCST90203621	36635386
GCST90202778	9,10-DiHOME levels	level of 9,10-dihydroxyoctadec-12-enoic acid in blood plasma	96 East Asian	http://ftp.ebi.ac.uk/pub/databases/gwas/summary_statistics/GCST90202001-GCST90203000/GCST90202778	36635386
GCST90200353	9,10-DiHOME levels	level of 9,10-dihydroxyoctadec-12-enoic acid in blood plasma	7557 European	http://ftp.ebi.ac.uk/pub/databases/gwas/summary_statistics/GCST90200001-GCST90201000/GCST90200353	36635386
GCST90203772	9,10-DiHOME levels	level of 9,10-dihydroxyoctadec-12-enoic acid in blood plasma	98 South Asian	http://ftp.ebi.ac.uk/pub/databases/gwas/summary_statistics/GCST90203001-GCST90204000/GCST90203772	36635386
GCST90201741	9,10-DiHOME levels	level of 9,10-dihydroxyoctadec-12-enoic acid in blood plasma	57 African unspecified	http://ftp.ebi.ac.uk/pub/databases/gwas/summary_statistics/GCST90201001-GCST90202000/GCST90201741	36635386
GCST90199974	9-hydroxystearate levels	9-hydroxystearate measurement	7474 European	http://ftp.ebi.ac.uk/pub/databases/gwas/summary_statistics/GCST90199001-GCST90200000/GCST90199974	36635386
GCST90203431	9-hydroxystearate levels	9-hydroxystearate measurement	95 South Asian	http://ftp.ebi.ac.uk/pub/databases/gwas/summary_statistics/GCST90203001-GCST90204000/GCST90203431	36635386
GCST90201372	9-hydroxystearate levels	9-hydroxystearate measurement	47 African unspecified	http://ftp.ebi.ac.uk/pub/databases/gwas/summary_statistics/GCST90201001-GCST90202000/GCST90201372	36635386
GCST90202419	9-hydroxystearate levels	9-hydroxystearate measurement	90 East Asian	http://ftp.ebi.ac.uk/pub/databases/gwas/summary_statistics/GCST90202001-GCST90203000/GCST90202419	36635386
GCST90202755	Acetoacetate levels	acetoacetate measurement	90 East Asian	http://ftp.ebi.ac.uk/pub/databases/gwas/summary_statistics/GCST90202001-GCST90203000/GCST90202755	36635386
GCST90200318	Acetoacetate levels	acetoacetate measurement	6883 European	http://ftp.ebi.ac.uk/pub/databases/gwas/summary_statistics/GCST90200001-GCST90201000/GCST90200318	36635386
GCST90203749	Acetoacetate levels	acetoacetate measurement	81 South Asian	http://ftp.ebi.ac.uk/pub/databases/gwas/summary_statistics/GCST90203001-GCST90204000/GCST90203749	36635386
GCST90201711	Acetoacetate levels	acetoacetate measurement	45 African unspecified	http://ftp.ebi.ac.uk/pub/databases/gwas/summary_statistics/GCST90201001-GCST90202000/GCST90201711	36635386
GCST90201064	Acetylcarnitine (c2) levels	acetylcarnitine measurement	60 African unspecified	http://ftp.ebi.ac.uk/pub/databases/gwas/summary_statistics/GCST90201001-GCST90202000/GCST90201064	36635386
GCST90199669	Acetylcarnitine (c2) levels	acetylcarnitine measurement	8262 European	http://ftp.ebi.ac.uk/pub/databases/gwas/summary_statistics/GCST90199001-GCST90200000/GCST90199669	36635386
GCST90203137	Acetylcarnitine (c2) levels	acetylcarnitine measurement	108 South Asian	http://ftp.ebi.ac.uk/pub/databases/gwas/summary_statistics/GCST90203001-GCST90204000/GCST90203137	36635386
GCST90202103	Acetylcarnitine (c2) levels	acetylcarnitine measurement	102 East Asian	http://ftp.ebi.ac.uk/pub/databases/gwas/summary_statistics/GCST90202001-GCST90203000/GCST90202103	36635386
GCST90200934	Acetylcarnitine (C2) to propionylcarnitine (C3) ratio	metabolite ratio	8200 European	http://ftp.ebi.ac.uk/pub/databases/gwas/summary_statistics/GCST90200001-GCST90201000/GCST90200934	36635386
GCST90199962	Acisoga levels	acisoga measurement	7489 European	http://ftp.ebi.ac.uk/pub/databases/gwas/summary_statistics/GCST90199001-GCST90200000/GCST90199962	36635386
GCST90203409	Acisoga levels	acisoga measurement	100 South Asian	http://ftp.ebi.ac.uk/pub/databases/gwas/summary_statistics/GCST90203001-GCST90204000/GCST90203409	36635386
GCST90202395	Acisoga levels	acisoga measurement	98 East Asian	http://ftp.ebi.ac.uk/pub/databases/gwas/summary_statistics/GCST90202001-GCST90203000/GCST90202395	36635386
GCST90201360	Acisoga levels	acisoga measurement	57 African unspecified	http://ftp.ebi.ac.uk/pub/databases/gwas/summary_statistics/GCST90201001-GCST90202000/GCST90201360	36635386
GCST90202186	Aconitate [cis or trans] levels	aconitate measurement	104 East Asian	http://ftp.ebi.ac.uk/pub/databases/gwas/summary_statistics/GCST90202001-GCST90203000/GCST90202186	36635386
GCST90199745	Aconitate [cis or trans] levels	aconitate measurement	8262 European	http://ftp.ebi.ac.uk/pub/databases/gwas/summary_statistics/GCST90199001-GCST90200000/GCST90199745	36635386
GCST90201145	Aconitate [cis or trans] levels	aconitate measurement	60 African unspecified	http://ftp.ebi.ac.uk/pub/databases/gwas/summary_statistics/GCST90201001-GCST90202000/GCST90201145	36635386
GCST90201766	Adenosine 3',5'-cyclic monophosphate (camp) levels	cyclic adenosine monophosphate measurement	51 African unspecified	http://ftp.ebi.ac.uk/pub/databases/gwas/summary_statistics/GCST90201001-GCST90202000/GCST90201766	36635386
GCST90202798	Adenosine 3',5'-cyclic monophosphate (camp) levels	cyclic adenosine monophosphate measurement	88 East Asian	http://ftp.ebi.ac.uk/pub/databases/gwas/summary_statistics/GCST90202001-GCST90203000/GCST90202798	36635386
GCST90203785	Adenosine 3',5'-cyclic monophosphate (camp) levels	cyclic adenosine monophosphate measurement	81 South Asian	http://ftp.ebi.ac.uk/pub/databases/gwas/summary_statistics/GCST90203001-GCST90204000/GCST90203785	36635386
GCST90200357	Adenosine 3',5'-cyclic monophosphate (camp) levels	cyclic adenosine monophosphate measurement	6756 European	http://ftp.ebi.ac.uk/pub/databases/gwas/summary_statistics/GCST90200001-GCST90201000/GCST90200357	36635386
GCST90200719	Adenosine 3',5'-cyclic monophosphate (cAMP) to adenosine 5'-monophosphate (AMP) ratio	metabolite ratio	6726 European	http://ftp.ebi.ac.uk/pub/databases/gwas/summary_statistics/GCST90200001-GCST90201000/GCST90200719	36635386
GCST90200727	Adenosine 3',5'-cyclic monophosphate (cAMP) to taurocholate ratio	metabolite ratio	6329 European	http://ftp.ebi.ac.uk/pub/databases/gwas/summary_statistics/GCST90200001-GCST90201000/GCST90200727	36635386
GCST90200355	Adenosine 5'-diphosphate (ADP) levels	adenosine diphosphate measurement	4607 European	http://ftp.ebi.ac.uk/pub/databases/gwas/summary_statistics/GCST90200001-GCST90201000/GCST90200355	36635386
GCST90201763	Adenosine 5'-diphosphate (ADP) levels	adenosine diphosphate measurement	31 African unspecified	http://ftp.ebi.ac.uk/pub/databases/gwas/summary_statistics/GCST90201001-GCST90202000/GCST90201763	36635386
GCST90200737	Adenosine 5'-diphosphate (ADP) to 2'-deoxyuridine ratio	metabolite ratio	4391 European	http://ftp.ebi.ac.uk/pub/databases/gwas/summary_statistics/GCST90200001-GCST90201000/GCST90200737	36635386
GCST90200964	Adenosine 5'-diphosphate (ADP) to 5-oxoproline ratio	metabolite ratio	4570 European	http://ftp.ebi.ac.uk/pub/databases/gwas/summary_statistics/GCST90200001-GCST90201000/GCST90200964	36635386
GCST90200728	Adenosine 5'-diphosphate (ADP) to Adenosine 5'-monophosphate (AMP) ratio	metabolite ratio	4573 European	http://ftp.ebi.ac.uk/pub/databases/gwas/summary_statistics/GCST90200001-GCST90201000/GCST90200728	36635386
GCST90200736	Adenosine 5'-diphosphate (ADP) to arginine ratio	metabolite ratio	4568 European	http://ftp.ebi.ac.uk/pub/databases/gwas/summary_statistics/GCST90200001-GCST90201000/GCST90200736	36635386
GCST90200839	Adenosine 5'-diphosphate (ADP) to aspartate ratio	metabolite ratio	4563 European	http://ftp.ebi.ac.uk/pub/databases/gwas/summary_statistics/GCST90200001-GCST90201000/GCST90200839	36635386
GCST90200955	Adenosine 5'-diphosphate (ADP) to choline phosphate ratio	metabolite ratio	4560 European	http://ftp.ebi.ac.uk/pub/databases/gwas/summary_statistics/GCST90200001-GCST90201000/GCST90200955	36635386
GCST90200958	Adenosine 5'-diphosphate (ADP) to choline ratio	metabolite ratio	4560 European	http://ftp.ebi.ac.uk/pub/databases/gwas/summary_statistics/GCST90200001-GCST90201000/GCST90200958	36635386
GCST90200832	Adenosine 5'-diphosphate (ADP) to citrate ratio	metabolite ratio	4567 European	http://ftp.ebi.ac.uk/pub/databases/gwas/summary_statistics/GCST90200001-GCST90201000/GCST90200832	36635386
GCST90200725	Adenosine 5'-diphosphate (ADP) to creatine ratio	metabolite ratio	4561 European	http://ftp.ebi.ac.uk/pub/databases/gwas/summary_statistics/GCST90200001-GCST90201000/GCST90200725	36635386
GCST90200952	Adenosine 5'-diphosphate (ADP) to cytidine ratio	metabolite ratio	4350 European	http://ftp.ebi.ac.uk/pub/databases/gwas/summary_statistics/GCST90200001-GCST90201000/GCST90200952	36635386
GCST90200940	Adenosine 5'-diphosphate (ADP) to EDTA ratio	metabolite ratio	4563 European	http://ftp.ebi.ac.uk/pub/databases/gwas/summary_statistics/GCST90200001-GCST90201000/GCST90200940	36635386
GCST90200840	Adenosine 5'-diphosphate (ADP) to flavin adenine dinucleotide (FAD) ratio	metabolite ratio	3441 European	http://ftp.ebi.ac.uk/pub/databases/gwas/summary_statistics/GCST90200001-GCST90201000/GCST90200840	36635386
GCST90200730	Adenosine 5'-diphosphate (ADP) to fructose ratio	metabolite ratio	4571 European	http://ftp.ebi.ac.uk/pub/databases/gwas/summary_statistics/GCST90200001-GCST90201000/GCST90200730	36635386
GCST90200746	Adenosine 5'-diphosphate (ADP) to gluconate ratio	metabolite ratio	4540 European	http://ftp.ebi.ac.uk/pub/databases/gwas/summary_statistics/GCST90200001-GCST90201000/GCST90200746	36635386
GCST90200947	Adenosine 5'-diphosphate (ADP) to glucose ratio	metabolite ratio	4581 European	http://ftp.ebi.ac.uk/pub/databases/gwas/summary_statistics/GCST90200001-GCST90201000/GCST90200947	36635386
GCST90200837	Adenosine 5'-diphosphate (ADP) to glutamate ratio	metabolite ratio	4556 European	http://ftp.ebi.ac.uk/pub/databases/gwas/summary_statistics/GCST90200001-GCST90201000/GCST90200837	36635386
GCST90200962	Adenosine 5'-diphosphate (ADP) to glutamine ratio	metabolite ratio	4569 European	http://ftp.ebi.ac.uk/pub/databases/gwas/summary_statistics/GCST90200001-GCST90201000/GCST90200962	36635386
GCST90200818	Adenosine 5'-diphosphate (ADP) to glycerate ratio	metabolite ratio	4544 European	http://ftp.ebi.ac.uk/pub/databases/gwas/summary_statistics/GCST90200001-GCST90201000/GCST90200818	36635386
GCST90200834	Adenosine 5'-diphosphate (ADP) to glycerol 3-phosphate ratio	metabolite ratio	4588 European	http://ftp.ebi.ac.uk/pub/databases/gwas/summary_statistics/GCST90200001-GCST90201000/GCST90200834	36635386
GCST90200835	Adenosine 5'-diphosphate (ADP) to glycerol ratio	metabolite ratio	4575 European	http://ftp.ebi.ac.uk/pub/databases/gwas/summary_statistics/GCST90200001-GCST90201000/GCST90200835	36635386
GCST90200821	Adenosine 5'-diphosphate (ADP) to glycine ratio	metabolite ratio	4577 European	http://ftp.ebi.ac.uk/pub/databases/gwas/summary_statistics/GCST90200001-GCST90201000/GCST90200821	36635386
GCST90200948	Adenosine 5'-diphosphate (ADP) to mannitol to sorbitol ratio	metabolite ratio	4566 European	http://ftp.ebi.ac.uk/pub/databases/gwas/summary_statistics/GCST90200001-GCST90201000/GCST90200948	36635386
GCST90200731	Adenosine 5'-diphosphate (ADP) to mannose ratio	metabolite ratio	4587 European	http://ftp.ebi.ac.uk/pub/databases/gwas/summary_statistics/GCST90200001-GCST90201000/GCST90200731	36635386
GCST90200733	Adenosine 5'-diphosphate (ADP) to N-acetylglucosamine to N-acetylgalactosamine ratio	metabolite ratio	4392 European	http://ftp.ebi.ac.uk/pub/databases/gwas/summary_statistics/GCST90200001-GCST90201000/GCST90200733	36635386
GCST90200949	Adenosine 5'-diphosphate (ADP) to N-acetylneuraminate ratio	metabolite ratio	4553 European	http://ftp.ebi.ac.uk/pub/databases/gwas/summary_statistics/GCST90200001-GCST90201000/GCST90200949	36635386
GCST90200823	Adenosine 5'-diphosphate (ADP) to N-palmitoyl-sphingosine (d18:1 to 16:0) ratio	metabolite ratio	4561 European	http://ftp.ebi.ac.uk/pub/databases/gwas/summary_statistics/GCST90200001-GCST90201000/GCST90200823	36635386
GCST90200961	Adenosine 5'-diphosphate (ADP) to ornithine ratio	metabolite ratio	4566 European	http://ftp.ebi.ac.uk/pub/databases/gwas/summary_statistics/GCST90200001-GCST90201000/GCST90200961	36635386
GCST90200841	Adenosine 5'-diphosphate (ADP) to oxalate (ethanedioate) ratio	metabolite ratio	4556 European	http://ftp.ebi.ac.uk/pub/databases/gwas/summary_statistics/GCST90200001-GCST90201000/GCST90200841	36635386
GCST90200720	Adenosine 5'-diphosphate (ADP) to pantothenate ratio	metabolite ratio	4561 European	http://ftp.ebi.ac.uk/pub/databases/gwas/summary_statistics/GCST90200001-GCST90201000/GCST90200720	36635386
GCST90200721	Adenosine 5'-diphosphate (ADP) to phosphate ratio	metabolite ratio	4559 European	http://ftp.ebi.ac.uk/pub/databases/gwas/summary_statistics/GCST90200001-GCST90201000/GCST90200721	36635386
GCST90200716	Adenosine 5'-diphosphate (ADP) to phosphoethanolamine ratio	metabolite ratio	4579 European	http://ftp.ebi.ac.uk/pub/databases/gwas/summary_statistics/GCST90200001-GCST90201000/GCST90200716	36635386
GCST90200824	Adenosine 5'-diphosphate (ADP) to sulfate ratio	metabolite ratio	4570 European	http://ftp.ebi.ac.uk/pub/databases/gwas/summary_statistics/GCST90200001-GCST90201000/GCST90200824	36635386
GCST90200732	Adenosine 5'-diphosphate (ADP) to tyrosine ratio	metabolite ratio	4560 European	http://ftp.ebi.ac.uk/pub/databases/gwas/summary_statistics/GCST90200001-GCST90201000/GCST90200732	36635386
GCST90200966	Adenosine 5'-diphosphate (ADP) to uridine ratio	metabolite ratio	4565 European	http://ftp.ebi.ac.uk/pub/databases/gwas/summary_statistics/GCST90200001-GCST90201000/GCST90200966	36635386
GCST90200820	Adenosine 5'-diphosphate (ADP) to valine ratio	metabolite ratio	4608 European	http://ftp.ebi.ac.uk/pub/databases/gwas/summary_statistics/GCST90200001-GCST90201000/GCST90200820	36635386
GCST90202800	Adenosine 5'-monophosphate (AMP) levels	Adenosine 5'-monophosphate measurement	104 East Asian	http://ftp.ebi.ac.uk/pub/databases/gwas/summary_statistics/GCST90202001-GCST90203000/GCST90202800	36635386
GCST90203782	Adenosine 5'-monophosphate (AMP) levels	Adenosine 5'-monophosphate measurement	108 South Asian	http://ftp.ebi.ac.uk/pub/databases/gwas/summary_statistics/GCST90203001-GCST90204000/GCST90203782	36635386
GCST90200356	Adenosine 5'-monophosphate (AMP) levels	Adenosine 5'-monophosphate measurement	8218 European	http://ftp.ebi.ac.uk/pub/databases/gwas/summary_statistics/GCST90200001-GCST90201000/GCST90200356	36635386
GCST90201750	Adenosine 5'-monophosphate (AMP) levels	Adenosine 5'-monophosphate measurement	60 African unspecified	http://ftp.ebi.ac.uk/pub/databases/gwas/summary_statistics/GCST90201001-GCST90202000/GCST90201750	36635386
GCST90200870	Adenosine 5'-monophosphate (AMP) to acetoacetate ratio	metabolite ratio	6773 European	http://ftp.ebi.ac.uk/pub/databases/gwas/summary_statistics/GCST90200001-GCST90201000/GCST90200870	36635386
GCST90200741	Adenosine 5'-monophosphate (AMP) to alanine ratio	metabolite ratio	8172 European	http://ftp.ebi.ac.uk/pub/databases/gwas/summary_statistics/GCST90200001-GCST90201000/GCST90200741	36635386
GCST90200852	Adenosine 5'-monophosphate (AMP) to arginine ratio	metabolite ratio	8185 European	http://ftp.ebi.ac.uk/pub/databases/gwas/summary_statistics/GCST90200001-GCST90201000/GCST90200852	36635386
GCST90200859	Adenosine 5'-monophosphate (AMP) to asparagine ratio	metabolite ratio	8188 European	http://ftp.ebi.ac.uk/pub/databases/gwas/summary_statistics/GCST90200001-GCST90201000/GCST90200859	36635386
GCST90200857	Adenosine 5'-monophosphate (AMP) to aspartate ratio	metabolite ratio	8205 European	http://ftp.ebi.ac.uk/pub/databases/gwas/summary_statistics/GCST90200001-GCST90201000/GCST90200857	36635386
GCST90200845	Adenosine 5'-monophosphate (AMP) to citrate ratio	metabolite ratio	8193 European	http://ftp.ebi.ac.uk/pub/databases/gwas/summary_statistics/GCST90200001-GCST90201000/GCST90200845	36635386
GCST90200871	Adenosine 5'-monophosphate (AMP) to cysteine ratio	metabolite ratio	8177 European	http://ftp.ebi.ac.uk/pub/databases/gwas/summary_statistics/GCST90200001-GCST90201000/GCST90200871	36635386
GCST90200945	Adenosine 5'-monophosphate (AMP) to EDTA ratio	metabolite ratio	8179 European	http://ftp.ebi.ac.uk/pub/databases/gwas/summary_statistics/GCST90200001-GCST90201000/GCST90200945	36635386
GCST90200843	Adenosine 5'-monophosphate (AMP) to flavin adenine dinucleotide (FAD) ratio	metabolite ratio	6188 European	http://ftp.ebi.ac.uk/pub/databases/gwas/summary_statistics/GCST90200001-GCST90201000/GCST90200843	36635386
GCST90200879	Adenosine 5'-monophosphate (AMP) to glutamate ratio	metabolite ratio	8213 European	http://ftp.ebi.ac.uk/pub/databases/gwas/summary_statistics/GCST90200001-GCST90201000/GCST90200879	36635386
GCST90200848	Adenosine 5'-monophosphate (AMP) to glutamine ratio	metabolite ratio	8196 European	http://ftp.ebi.ac.uk/pub/databases/gwas/summary_statistics/GCST90200001-GCST90201000/GCST90200848	36635386
GCST90200851	Adenosine 5'-monophosphate (AMP) to glycine ratio	metabolite ratio	8195 European	http://ftp.ebi.ac.uk/pub/databases/gwas/summary_statistics/GCST90200001-GCST90201000/GCST90200851	36635386
GCST90200865	Adenosine 5'-monophosphate (AMP) to histidine ratio	metabolite ratio	8180 European	http://ftp.ebi.ac.uk/pub/databases/gwas/summary_statistics/GCST90200001-GCST90201000/GCST90200865	36635386
GCST90200738	Adenosine 5'-monophosphate (AMP) to inosine 5'-monophosphate (IMP) ratio	metabolite ratio	4601 European	http://ftp.ebi.ac.uk/pub/databases/gwas/summary_statistics/GCST90200001-GCST90201000/GCST90200738	36635386
GCST90200867	Adenosine 5'-monophosphate (AMP) to isoleucine ratio	metabolite ratio	8200 European	http://ftp.ebi.ac.uk/pub/databases/gwas/summary_statistics/GCST90200001-GCST90201000/GCST90200867	36635386
GCST90200970	Adenosine 5'-monophosphate (AMP) to leucine ratio	metabolite ratio	8201 European	http://ftp.ebi.ac.uk/pub/databases/gwas/summary_statistics/GCST90200001-GCST90201000/GCST90200970	36635386
GCST90200862	Adenosine 5'-monophosphate (AMP) to methionine ratio	metabolite ratio	8194 European	http://ftp.ebi.ac.uk/pub/databases/gwas/summary_statistics/GCST90200001-GCST90201000/GCST90200862	36635386
GCST90200969	Adenosine 5'-monophosphate (AMP) to N-palmitoyl-sphingosine (d18:1 to 16:0) ratio	metabolite ratio	8188 European	http://ftp.ebi.ac.uk/pub/databases/gwas/summary_statistics/GCST90200001-GCST90201000/GCST90200969	36635386
GCST90200734	Adenosine 5'-monophosphate (AMP) to palmitate (16:0) ratio	metabolite ratio	8227 European	http://ftp.ebi.ac.uk/pub/databases/gwas/summary_statistics/GCST90200001-GCST90201000/GCST90200734	36635386
GCST90200745	Adenosine 5'-monophosphate (AMP) to phenylalanine ratio	metabolite ratio	8189 European	http://ftp.ebi.ac.uk/pub/databases/gwas/summary_statistics/GCST90200001-GCST90201000/GCST90200745	36635386
GCST90200747	Adenosine 5'-monophosphate (AMP) to phosphate ratio	metabolite ratio	8184 European	http://ftp.ebi.ac.uk/pub/databases/gwas/summary_statistics/GCST90200001-GCST90201000/GCST90200747	36635386
GCST90200739	Adenosine 5'-monophosphate (AMP) to proline ratio	metabolite ratio	8190 European	http://ftp.ebi.ac.uk/pub/databases/gwas/summary_statistics/GCST90200001-GCST90201000/GCST90200739	36635386
GCST90200860	Adenosine 5'-monophosphate (AMP) to serine ratio	metabolite ratio	8194 European	http://ftp.ebi.ac.uk/pub/databases/gwas/summary_statistics/GCST90200001-GCST90201000/GCST90200860	36635386
GCST90200849	Adenosine 5'-monophosphate (AMP) to threonine ratio	metabolite ratio	8173 European	http://ftp.ebi.ac.uk/pub/databases/gwas/summary_statistics/GCST90200001-GCST90201000/GCST90200849	36635386
GCST90200850	Adenosine 5'-monophosphate (AMP) to tryptophan ratio	metabolite ratio	8180 European	http://ftp.ebi.ac.uk/pub/databases/gwas/summary_statistics/GCST90200001-GCST90201000/GCST90200850	36635386
GCST90200853	Adenosine 5'-monophosphate (AMP) to tyrosine ratio	metabolite ratio	8193 European	http://ftp.ebi.ac.uk/pub/databases/gwas/summary_statistics/GCST90200001-GCST90201000/GCST90200853	36635386
GCST90200976	Adenosine 5'-monophosphate (AMP) to urate ratio	metabolite ratio	8181 European	http://ftp.ebi.ac.uk/pub/databases/gwas/summary_statistics/GCST90200001-GCST90201000/GCST90200976	36635386
GCST90200869	Adenosine 5'-monophosphate (AMP) to valine ratio	metabolite ratio	8225 European	http://ftp.ebi.ac.uk/pub/databases/gwas/summary_statistics/GCST90200001-GCST90201000/GCST90200869	36635386
GCST90200018	Adipoylcarnitine (C6-DC) levels	adipoylcarnitine (C6-DC) measurement	8216 European	http://ftp.ebi.ac.uk/pub/databases/gwas/summary_statistics/GCST90200001-GCST90201000/GCST90200018	36635386
GCST90201431	Adipoylcarnitine (C6-DC) levels	adipoylcarnitine (C6-DC) measurement	59 African unspecified	http://ftp.ebi.ac.uk/pub/databases/gwas/summary_statistics/GCST90201001-GCST90202000/GCST90201431	36635386
GCST90203454	Adipoylcarnitine (C6-DC) levels	adipoylcarnitine (C6-DC) measurement	108 South Asian	http://ftp.ebi.ac.uk/pub/databases/gwas/summary_statistics/GCST90203001-GCST90204000/GCST90203454	36635386
GCST90202455	Adipoylcarnitine (C6-DC) levels	adipoylcarnitine (C6-DC) measurement	104 East Asian	http://ftp.ebi.ac.uk/pub/databases/gwas/summary_statistics/GCST90202001-GCST90203000/GCST90202455	36635386
GCST90201113	Adrenate (22:4n6) levels	adrenate 22:4n6 measurement	60 African unspecified	http://ftp.ebi.ac.uk/pub/databases/gwas/summary_statistics/GCST90201001-GCST90202000/GCST90201113	36635386
GCST90202145	Adrenate (22:4n6) levels	adrenate 22:4n6 measurement	104 East Asian	http://ftp.ebi.ac.uk/pub/databases/gwas/summary_statistics/GCST90202001-GCST90203000/GCST90202145	36635386
GCST90199709	Adrenate (22:4n6) levels	adrenate 22:4n6 measurement	8279 European	http://ftp.ebi.ac.uk/pub/databases/gwas/summary_statistics/GCST90199001-GCST90200000/GCST90199709	36635386
GCST90203187	Adrenate (22:4n6) levels	adrenate 22:4n6 measurement	107 South Asian	http://ftp.ebi.ac.uk/pub/databases/gwas/summary_statistics/GCST90203001-GCST90204000/GCST90203187	36635386
GCST90200431	Alanine levels	alanine measurement	8265 European	http://ftp.ebi.ac.uk/pub/databases/gwas/summary_statistics/GCST90200001-GCST90201000/GCST90200431	36635386
GCST90201842	Alanine levels	alanine measurement	60 African unspecified	http://ftp.ebi.ac.uk/pub/databases/gwas/summary_statistics/GCST90201001-GCST90202000/GCST90201842	36635386
GCST90203861	Alanine levels	alanine measurement	108 South Asian	http://ftp.ebi.ac.uk/pub/databases/gwas/summary_statistics/GCST90203001-GCST90204000/GCST90203861	36635386
GCST90202878	Alanine levels	alanine measurement	104 East Asian	http://ftp.ebi.ac.uk/pub/databases/gwas/summary_statistics/GCST90202001-GCST90203000/GCST90202878	36635386
GCST90200992	Alanine to asparagine ratio	metabolite ratio	8248 European	http://ftp.ebi.ac.uk/pub/databases/gwas/summary_statistics/GCST90200001-GCST90201000/GCST90200992	36635386
GCST90200780	Alanine to pyruvate ratio	metabolite ratio	8250 European	http://ftp.ebi.ac.uk/pub/databases/gwas/summary_statistics/GCST90200001-GCST90201000/GCST90200780	36635386
GCST90202720	Allantoin levels	allantoin measurement	103 East Asian	http://ftp.ebi.ac.uk/pub/databases/gwas/summary_statistics/GCST90202001-GCST90203000/GCST90202720	36635386
GCST90203716	Allantoin levels	allantoin measurement	108 South Asian	http://ftp.ebi.ac.uk/pub/databases/gwas/summary_statistics/GCST90203001-GCST90204000/GCST90203716	36635386
GCST90201686	Allantoin levels	allantoin measurement	59 African unspecified	http://ftp.ebi.ac.uk/pub/databases/gwas/summary_statistics/GCST90201001-GCST90202000/GCST90201686	36635386
GCST90200286	Allantoin levels	allantoin measurement	8252 European	http://ftp.ebi.ac.uk/pub/databases/gwas/summary_statistics/GCST90200001-GCST90201000/GCST90200286	36635386
GCST90201324	Alliin levels	alliin measurement	50 African unspecified	http://ftp.ebi.ac.uk/pub/databases/gwas/summary_statistics/GCST90201001-GCST90202000/GCST90201324	36635386
GCST90199919	Alliin levels	alliin measurement	6517 European	http://ftp.ebi.ac.uk/pub/databases/gwas/summary_statistics/GCST90199001-GCST90200000/GCST90199919	36635386
GCST90203390	Alliin levels	alliin measurement	96 South Asian	http://ftp.ebi.ac.uk/pub/databases/gwas/summary_statistics/GCST90203001-GCST90204000/GCST90203390	36635386
GCST90202376	Alliin levels	alliin measurement	98 East Asian	http://ftp.ebi.ac.uk/pub/databases/gwas/summary_statistics/GCST90202001-GCST90203000/GCST90202376	36635386
GCST90203280	Alpha-hydroxycaproate levels	alpha-hydroxycaproate measurement	76 South Asian	http://ftp.ebi.ac.uk/pub/databases/gwas/summary_statistics/GCST90203001-GCST90204000/GCST90203280	36635386
GCST90202248	Alpha-hydroxycaproate levels	alpha-hydroxycaproate measurement	69 East Asian	http://ftp.ebi.ac.uk/pub/databases/gwas/summary_statistics/GCST90202001-GCST90203000/GCST90202248	36635386
GCST90199814	Alpha-hydroxycaproate levels	alpha-hydroxycaproate measurement	5169 European	http://ftp.ebi.ac.uk/pub/databases/gwas/summary_statistics/GCST90199001-GCST90200000/GCST90199814	36635386
GCST90201212	Alpha-hydroxycaproate levels	alpha-hydroxycaproate measurement	48 African unspecified	http://ftp.ebi.ac.uk/pub/databases/gwas/summary_statistics/GCST90201001-GCST90202000/GCST90201212	36635386
GCST90201058	Alpha-hydroxyisocaproate levels	alpha-hydroxyisocaproate measurement	60 African unspecified	http://ftp.ebi.ac.uk/pub/databases/gwas/summary_statistics/GCST90201001-GCST90202000/GCST90201058	36635386
GCST90199658	Alpha-hydroxyisocaproate levels	alpha-hydroxyisocaproate measurement	8250 European	http://ftp.ebi.ac.uk/pub/databases/gwas/summary_statistics/GCST90199001-GCST90200000/GCST90199658	36635386
GCST90203122	Alpha-hydroxyisocaproate levels	alpha-hydroxyisocaproate measurement	107 South Asian	http://ftp.ebi.ac.uk/pub/databases/gwas/summary_statistics/GCST90203001-GCST90204000/GCST90203122	36635386
GCST90202088	Alpha-hydroxyisocaproate levels	alpha-hydroxyisocaproate measurement	104 East Asian	http://ftp.ebi.ac.uk/pub/databases/gwas/summary_statistics/GCST90202001-GCST90203000/GCST90202088	36635386
GCST90202177	Alpha-hydroxyisovalerate levels	alpha-hydroxyisovalerate measurement	103 East Asian	http://ftp.ebi.ac.uk/pub/databases/gwas/summary_statistics/GCST90202001-GCST90203000/GCST90202177	36635386
GCST90199736	Alpha-hydroxyisovalerate levels	alpha-hydroxyisovalerate measurement	8208 European	http://ftp.ebi.ac.uk/pub/databases/gwas/summary_statistics/GCST90199001-GCST90200000/GCST90199736	36635386
GCST90201147	Alpha-hydroxyisovalerate levels	alpha-hydroxyisovalerate measurement	60 African unspecified	http://ftp.ebi.ac.uk/pub/databases/gwas/summary_statistics/GCST90201001-GCST90202000/GCST90201147	36635386
GCST90200438	Alpha-ketobutyrate levels	alpha-ketobutyrate measurement	8192 European	http://ftp.ebi.ac.uk/pub/databases/gwas/summary_statistics/GCST90200001-GCST90201000/GCST90200438	36635386
GCST90201830	Alpha-ketobutyrate levels	alpha-ketobutyrate measurement	60 African unspecified	http://ftp.ebi.ac.uk/pub/databases/gwas/summary_statistics/GCST90201001-GCST90202000/GCST90201830	36635386
GCST90203863	Alpha-ketobutyrate levels	alpha-ketobutyrate measurement	106 South Asian	http://ftp.ebi.ac.uk/pub/databases/gwas/summary_statistics/GCST90203001-GCST90204000/GCST90203863	36635386
GCST90202875	Alpha-ketobutyrate levels	alpha-ketobutyrate measurement	98 East Asian	http://ftp.ebi.ac.uk/pub/databases/gwas/summary_statistics/GCST90202001-GCST90203000/GCST90202875	36635386
GCST90200917	Alpha-ketobutyrate to 3-methyl-2-oxobutyrate ratio	metabolite ratio	8133 European	http://ftp.ebi.ac.uk/pub/databases/gwas/summary_statistics/GCST90200001-GCST90201000/GCST90200917	36635386
GCST90201006	Alpha-ketobutyrate to 3-methyl-2-oxovalerate ratio	metabolite ratio	8136 European	http://ftp.ebi.ac.uk/pub/databases/gwas/summary_statistics/GCST90201001-GCST90202000/GCST90201006	36635386
GCST90201010	Alpha-ketobutyrate to 4-methyl-2-oxopentanoate ratio	metabolite ratio	8142 European	http://ftp.ebi.ac.uk/pub/databases/gwas/summary_statistics/GCST90201001-GCST90202000/GCST90201010	36635386
GCST90200922	Alpha-ketobutyrate to pyruvate ratio	metabolite ratio	8129 European	http://ftp.ebi.ac.uk/pub/databases/gwas/summary_statistics/GCST90200001-GCST90201000/GCST90200922	36635386
GCST90201291	Alpha-ketoglutaramate levels	alpha-ketoglutaramate measurement	60 African unspecified	http://ftp.ebi.ac.uk/pub/databases/gwas/summary_statistics/GCST90201001-GCST90202000/GCST90201291	36635386
GCST90202327	Alpha-ketoglutaramate levels	alpha-ketoglutaramate measurement	103 East Asian	http://ftp.ebi.ac.uk/pub/databases/gwas/summary_statistics/GCST90202001-GCST90203000/GCST90202327	36635386
GCST90199885	Alpha-ketoglutaramate levels	alpha-ketoglutaramate measurement	8210 European	http://ftp.ebi.ac.uk/pub/databases/gwas/summary_statistics/GCST90199001-GCST90200000/GCST90199885	36635386
GCST90203348	Alpha-ketoglutaramate levels	alpha-ketoglutaramate measurement	108 South Asian	http://ftp.ebi.ac.uk/pub/databases/gwas/summary_statistics/GCST90203001-GCST90204000/GCST90203348	36635386
GCST90200455	Alpha-ketoglutarate levels	Alpha ketoglutarate measurement	8212 European	http://ftp.ebi.ac.uk/pub/databases/gwas/summary_statistics/GCST90200001-GCST90201000/GCST90200455	36635386
GCST90201860	Alpha-ketoglutarate levels	Alpha ketoglutarate measurement	58 African unspecified	http://ftp.ebi.ac.uk/pub/databases/gwas/summary_statistics/GCST90201001-GCST90202000/GCST90201860	36635386
GCST90203876	Alpha-ketoglutarate levels	Alpha ketoglutarate measurement	107 South Asian	http://ftp.ebi.ac.uk/pub/databases/gwas/summary_statistics/GCST90203001-GCST90204000/GCST90203876	36635386
GCST90202887	Alpha-ketoglutarate levels	Alpha ketoglutarate measurement	103 East Asian	http://ftp.ebi.ac.uk/pub/databases/gwas/summary_statistics/GCST90202001-GCST90203000/GCST90202887	36635386
GCST90200938	Alpha-ketoglutarate to alanine ratio	metabolite ratio	8272 European	http://ftp.ebi.ac.uk/pub/databases/gwas/summary_statistics/GCST90200001-GCST90201000/GCST90200938	36635386
GCST90200714	Alpha-ketoglutarate to alpha-ketobutyrate ratio	metabolite ratio	8216 European	http://ftp.ebi.ac.uk/pub/databases/gwas/summary_statistics/GCST90200001-GCST90201000/GCST90200714	36635386
GCST90200816	Alpha-ketoglutarate to aspartate ratio	metabolite ratio	8272 European	http://ftp.ebi.ac.uk/pub/databases/gwas/summary_statistics/GCST90200001-GCST90201000/GCST90200816	36635386
GCST90200715	Alpha-ketoglutarate to glutamate ratio	metabolite ratio	8274 European	http://ftp.ebi.ac.uk/pub/databases/gwas/summary_statistics/GCST90200001-GCST90201000/GCST90200715	36635386
GCST90200810	Alpha-ketoglutarate to kynurenine ratio	metabolite ratio	8272 European	http://ftp.ebi.ac.uk/pub/databases/gwas/summary_statistics/GCST90200001-GCST90201000/GCST90200810	36635386
GCST90200814	Alpha-ketoglutarate to ornithine ratio	metabolite ratio	8273 European	http://ftp.ebi.ac.uk/pub/databases/gwas/summary_statistics/GCST90200001-GCST90201000/GCST90200814	36635386
GCST90200933	Alpha-ketoglutarate to proline ratio	metabolite ratio	8273 European	http://ftp.ebi.ac.uk/pub/databases/gwas/summary_statistics/GCST90200001-GCST90201000/GCST90200933	36635386
GCST90200944	Alpha-ketoglutarate to pyruvate ratio	metabolite ratio	8272 European	http://ftp.ebi.ac.uk/pub/databases/gwas/summary_statistics/GCST90200001-GCST90201000/GCST90200944	36635386
GCST90200718	Alpha-ketoglutarate to succinate ratio	metabolite ratio	8260 European	http://ftp.ebi.ac.uk/pub/databases/gwas/summary_statistics/GCST90200001-GCST90201000/GCST90200718	36635386
GCST90200937	Alpha-ketoglutarate to trans-4-hydroxyproline ratio	metabolite ratio	8272 European	http://ftp.ebi.ac.uk/pub/databases/gwas/summary_statistics/GCST90200001-GCST90201000/GCST90200937	36635386
GCST90202742	Alpha-tocopherol levels	alpha-tocopherol measurement	103 East Asian	http://ftp.ebi.ac.uk/pub/databases/gwas/summary_statistics/GCST90202001-GCST90203000/GCST90202742	36635386
GCST90203734	Alpha-tocopherol levels	alpha-tocopherol measurement	107 South Asian	http://ftp.ebi.ac.uk/pub/databases/gwas/summary_statistics/GCST90203001-GCST90204000/GCST90203734	36635386
GCST90201690	Alpha-tocopherol levels	alpha-tocopherol measurement	59 African unspecified	http://ftp.ebi.ac.uk/pub/databases/gwas/summary_statistics/GCST90201001-GCST90202000/GCST90201690	36635386
GCST90200302	Alpha-tocopherol levels	alpha-tocopherol measurement	8192 European	http://ftp.ebi.ac.uk/pub/databases/gwas/summary_statistics/GCST90200001-GCST90201000/GCST90200302	36635386
GCST90200924	Alpha-tocopherol to glycerol ratio	metabolite ratio	8158 European	http://ftp.ebi.ac.uk/pub/databases/gwas/summary_statistics/GCST90200001-GCST90201000/GCST90200924	36635386
GCST90200789	Alpha-tocopherol to sulfate ratio	metabolite ratio	8201 European	http://ftp.ebi.ac.uk/pub/databases/gwas/summary_statistics/GCST90200001-GCST90201000/GCST90200789	36635386
GCST90202321	Andro steroid monosulfate C19H28O6S (1) levels	andro steroid monosulfate C19H28O6S (1) measurement	96 East Asian	http://ftp.ebi.ac.uk/pub/databases/gwas/summary_statistics/GCST90202001-GCST90203000/GCST90202321	36635386
GCST90203331	Andro steroid monosulfate C19H28O6S (1) levels	andro steroid monosulfate C19H28O6S (1) measurement	101 South Asian	http://ftp.ebi.ac.uk/pub/databases/gwas/summary_statistics/GCST90203001-GCST90204000/GCST90203331	36635386
GCST90199860	Andro steroid monosulfate C19H28O6S (1) levels	andro steroid monosulfate C19H28O6S (1) measurement	7415 European	http://ftp.ebi.ac.uk/pub/databases/gwas/summary_statistics/GCST90199001-GCST90200000/GCST90199860	36635386
GCST90201278	Andro steroid monosulfate C19H28O6S (1) levels	andro steroid monosulfate C19H28O6S (1) measurement	54 African unspecified	http://ftp.ebi.ac.uk/pub/databases/gwas/summary_statistics/GCST90201001-GCST90202000/GCST90201278	36635386
GCST90203306	Androstenediol (3alpha, 17alpha) monosulfate (3) levels	androstenediol (3alpha, 17alpha) monosulfate (3) measurement	105 South Asian	http://ftp.ebi.ac.uk/pub/databases/gwas/summary_statistics/GCST90203001-GCST90204000/GCST90203306	36635386
GCST90202301	Androstenediol (3alpha, 17alpha) monosulfate (3) levels	androstenediol (3alpha, 17alpha) monosulfate (3) measurement	103 East Asian	http://ftp.ebi.ac.uk/pub/databases/gwas/summary_statistics/GCST90202001-GCST90203000/GCST90202301	36635386
GCST90199856	Androstenediol (3alpha, 17alpha) monosulfate (3) levels	androstenediol (3alpha, 17alpha) monosulfate (3) measurement	8192 European	http://ftp.ebi.ac.uk/pub/databases/gwas/summary_statistics/GCST90199001-GCST90200000/GCST90199856	36635386
GCST90201269	Androstenediol (3alpha, 17alpha) monosulfate (3) levels	androstenediol (3alpha, 17alpha) monosulfate (3) measurement	60 African unspecified	http://ftp.ebi.ac.uk/pub/databases/gwas/summary_statistics/GCST90201001-GCST90202000/GCST90201269	36635386
GCST90202295	Androstenediol (3beta,17beta) disulfate (1) levels	androstenediol (3beta,17beta) disulfate (1) measurement	103 East Asian	http://ftp.ebi.ac.uk/pub/databases/gwas/summary_statistics/GCST90202001-GCST90203000/GCST90202295	36635386
GCST90199842	Androstenediol (3beta,17beta) disulfate (1) levels	androstenediol (3beta,17beta) disulfate (1) measurement	8222 European	http://ftp.ebi.ac.uk/pub/databases/gwas/summary_statistics/GCST90199001-GCST90200000/GCST90199842	36635386
GCST90201250	Androstenediol (3beta,17beta) disulfate (1) levels	androstenediol (3beta,17beta) disulfate (1) measurement	60 African unspecified	http://ftp.ebi.ac.uk/pub/databases/gwas/summary_statistics/GCST90201001-GCST90202000/GCST90201250	36635386
GCST90202297	Androstenediol (3beta,17beta) disulfate (2) levels	androstenediol (3beta,17beta) disulfate (2) measurement	103 East Asian	http://ftp.ebi.ac.uk/pub/databases/gwas/summary_statistics/GCST90202001-GCST90203000/GCST90202297	36635386
GCST90199851	Androstenediol (3beta,17beta) disulfate (2) levels	androstenediol (3beta,17beta) disulfate (2) measurement	8205 European	http://ftp.ebi.ac.uk/pub/databases/gwas/summary_statistics/GCST90199001-GCST90200000/GCST90199851	36635386
GCST90201259	Androstenediol (3beta,17beta) disulfate (2) levels	androstenediol (3beta,17beta) disulfate (2) measurement	60 African unspecified	http://ftp.ebi.ac.uk/pub/databases/gwas/summary_statistics/GCST90201001-GCST90202000/GCST90201259	36635386
GCST90202304	Androstenediol (3beta,17beta) monosulfate (1) levels	androstenediol (3beta,17beta) monosulfate (1) measurement	103 East Asian	http://ftp.ebi.ac.uk/pub/databases/gwas/summary_statistics/GCST90202001-GCST90203000/GCST90202304	36635386
GCST90199872	Androstenediol (3beta,17beta) monosulfate (1) levels	androstenediol (3beta,17beta) monosulfate (1) measurement	8229 European	http://ftp.ebi.ac.uk/pub/databases/gwas/summary_statistics/GCST90199001-GCST90200000/GCST90199872	36635386
GCST90201264	Androstenediol (3beta,17beta) monosulfate (1) levels	androstenediol (3beta,17beta) monosulfate (1) measurement	60 African unspecified	http://ftp.ebi.ac.uk/pub/databases/gwas/summary_statistics/GCST90201001-GCST90202000/GCST90201264	36635386
GCST90202323	Androstenediol (3beta,17beta) monosulfate (2) levels	androstenediol (3beta,17beta) monosulfate (2) measurement	97 East Asian	http://ftp.ebi.ac.uk/pub/databases/gwas/summary_statistics/GCST90202001-GCST90203000/GCST90202323	36635386
GCST90199871	Androstenediol (3beta,17beta) monosulfate (2) levels	androstenediol (3beta,17beta) monosulfate (2) measurement	7811 European	http://ftp.ebi.ac.uk/pub/databases/gwas/summary_statistics/GCST90199001-GCST90200000/GCST90199871	36635386
GCST90203308	Androstenediol (3beta,17beta) monosulfate (2) levels	androstenediol (3beta,17beta) monosulfate (2) measurement	101 South Asian	http://ftp.ebi.ac.uk/pub/databases/gwas/summary_statistics/GCST90203001-GCST90204000/GCST90203308	36635386
GCST90201270	Androstenediol (3beta,17beta) monosulfate (2) levels	androstenediol (3beta,17beta) monosulfate (2) measurement	56 African unspecified	http://ftp.ebi.ac.uk/pub/databases/gwas/summary_statistics/GCST90201001-GCST90202000/GCST90201270	36635386
GCST90201314	Androsterone glucuronide levels	androsterone glucuronide measurement	59 African unspecified	http://ftp.ebi.ac.uk/pub/databases/gwas/summary_statistics/GCST90201001-GCST90202000/GCST90201314	36635386
GCST90200688	Androsterone glucuronide levels	androsterone glucuronide measurement	7980 European	http://ftp.ebi.ac.uk/pub/databases/gwas/summary_statistics/GCST90200001-GCST90201000/GCST90200688	36635386
GCST90202342	Androsterone glucuronide levels	androsterone glucuronide measurement	103 East Asian	http://ftp.ebi.ac.uk/pub/databases/gwas/summary_statistics/GCST90202001-GCST90203000/GCST90202342	36635386
GCST90203347	Androsterone glucuronide levels	androsterone glucuronide measurement	100 South Asian	http://ftp.ebi.ac.uk/pub/databases/gwas/summary_statistics/GCST90203001-GCST90204000/GCST90203347	36635386
GCST90201013	Androsterone glucuronide to etiocholanolone glucuronide ratio	metabolite ratio	7555 European	http://ftp.ebi.ac.uk/pub/databases/gwas/summary_statistics/GCST90201001-GCST90202000/GCST90201013	36635386
GCST90200674	Androsterone sulfate levels	androsterone sulfate measurement	8182 European	http://ftp.ebi.ac.uk/pub/databases/gwas/summary_statistics/GCST90200001-GCST90201000/GCST90200674	36635386
GCST90202127	Androsterone sulfate levels	androsterone sulfate measurement	103 East Asian	http://ftp.ebi.ac.uk/pub/databases/gwas/summary_statistics/GCST90202001-GCST90203000/GCST90202127	36635386
GCST90201094	Androsterone sulfate levels	androsterone sulfate measurement	60 African unspecified	http://ftp.ebi.ac.uk/pub/databases/gwas/summary_statistics/GCST90201001-GCST90202000/GCST90201094	36635386
GCST90202749	Anthranilate levels	anthranilate measurement	53 East Asian	http://ftp.ebi.ac.uk/pub/databases/gwas/summary_statistics/GCST90202001-GCST90203000/GCST90202749	36635386
GCST90200324	Anthranilate levels	anthranilate measurement	5773 European	http://ftp.ebi.ac.uk/pub/databases/gwas/summary_statistics/GCST90200001-GCST90201000/GCST90200324	36635386
GCST90203759	Anthranilate levels	anthranilate measurement	71 South Asian	http://ftp.ebi.ac.uk/pub/databases/gwas/summary_statistics/GCST90203001-GCST90204000/GCST90203759	36635386
GCST90201719	Anthranilate levels	anthranilate measurement	42 African unspecified	http://ftp.ebi.ac.uk/pub/databases/gwas/summary_statistics/GCST90201001-GCST90202000/GCST90201719	36635386
GCST90200011	Arabitol/xylitol levels	arabitol measurement	8219 European	http://ftp.ebi.ac.uk/pub/databases/gwas/summary_statistics/GCST90200001-GCST90201000/GCST90200011	36635386
GCST90201428	Arabitol/xylitol levels	arabitol measurement	60 African unspecified	http://ftp.ebi.ac.uk/pub/databases/gwas/summary_statistics/GCST90201001-GCST90202000/GCST90201428	36635386
GCST90203468	Arabitol/xylitol levels	arabitol measurement	108 South Asian	http://ftp.ebi.ac.uk/pub/databases/gwas/summary_statistics/GCST90203001-GCST90204000/GCST90203468	36635386
GCST90202461	Arabitol/xylitol levels	arabitol measurement	104 East Asian	http://ftp.ebi.ac.uk/pub/databases/gwas/summary_statistics/GCST90202001-GCST90203000/GCST90202461	36635386
GCST90199991	Arabonate/xylonate levels	arabonate measurement	8211 European	http://ftp.ebi.ac.uk/pub/databases/gwas/summary_statistics/GCST90199001-GCST90200000/GCST90199991	36635386
GCST90203445	Arabonate/xylonate levels	arabonate measurement	107 South Asian	http://ftp.ebi.ac.uk/pub/databases/gwas/summary_statistics/GCST90203001-GCST90204000/GCST90203445	36635386
GCST90201388	Arabonate/xylonate levels	arabonate measurement	60 African unspecified	http://ftp.ebi.ac.uk/pub/databases/gwas/summary_statistics/GCST90201001-GCST90202000/GCST90201388	36635386
GCST90202429	Arabonate/xylonate levels	arabonate measurement	104 East Asian	http://ftp.ebi.ac.uk/pub/databases/gwas/summary_statistics/GCST90202001-GCST90203000/GCST90202429	36635386
GCST90200446	Arachidate (20:0) levels	arachidate (20:0) measurement	8228 European	http://ftp.ebi.ac.uk/pub/databases/gwas/summary_statistics/GCST90200001-GCST90201000/GCST90200446	36635386
GCST90201835	Arachidate (20:0) levels	arachidate (20:0) measurement	59 African unspecified	http://ftp.ebi.ac.uk/pub/databases/gwas/summary_statistics/GCST90201001-GCST90202000/GCST90201835	36635386
GCST90203870	Arachidate (20:0) levels	arachidate (20:0) measurement	108 South Asian	http://ftp.ebi.ac.uk/pub/databases/gwas/summary_statistics/GCST90203001-GCST90204000/GCST90203870	36635386
GCST90202883	Arachidate (20:0) levels	arachidate (20:0) measurement	104 East Asian	http://ftp.ebi.ac.uk/pub/databases/gwas/summary_statistics/GCST90202001-GCST90203000/GCST90202883	36635386
GCST90202793	Arachidonate (20:4n6) levels	arachidonate 20:4n6 measurement	104 East Asian	http://ftp.ebi.ac.uk/pub/databases/gwas/summary_statistics/GCST90202001-GCST90203000/GCST90202793	36635386
GCST90203790	Arachidonate (20:4n6) levels	arachidonate 20:4n6 measurement	108 South Asian	http://ftp.ebi.ac.uk/pub/databases/gwas/summary_statistics/GCST90203001-GCST90204000/GCST90203790	36635386
GCST90200358	Arachidonate (20:4n6) levels	arachidonate 20:4n6 measurement	8272 European	http://ftp.ebi.ac.uk/pub/databases/gwas/summary_statistics/GCST90200001-GCST90201000/GCST90200358	36635386
GCST90201760	Arachidonate (20:4n6) levels	arachidonate 20:4n6 measurement	60 African unspecified	http://ftp.ebi.ac.uk/pub/databases/gwas/summary_statistics/GCST90201001-GCST90202000/GCST90201760	36635386
GCST90200975	Arachidonate (20:4n6) to caffeine ratio	metabolite ratio	8000 European	http://ftp.ebi.ac.uk/pub/databases/gwas/summary_statistics/GCST90200001-GCST90201000/GCST90200975	36635386
GCST90200979	Arachidonate (20:4n6) to linoleate (18:2n6) ratio	metabolite ratio	8162 European	http://ftp.ebi.ac.uk/pub/databases/gwas/summary_statistics/GCST90200001-GCST90201000/GCST90200979	36635386
GCST90200740	Arachidonate (20:4n6) to oleate to vaccenate (18:1) ratio	metabolite ratio	8171 European	http://ftp.ebi.ac.uk/pub/databases/gwas/summary_statistics/GCST90200001-GCST90201000/GCST90200740	36635386
GCST90200977	Arachidonate (20:4n6) to paraxanthine ratio	metabolite ratio	7776 European	http://ftp.ebi.ac.uk/pub/databases/gwas/summary_statistics/GCST90200001-GCST90201000/GCST90200977	36635386
GCST90200749	Arachidonate (20:4n6) to pyruvate ratio	metabolite ratio	8200 European	http://ftp.ebi.ac.uk/pub/databases/gwas/summary_statistics/GCST90200001-GCST90201000/GCST90200749	36635386
GCST90203576	Arachidonoylcarnitine (C20:4) levels	arachidonoylcarnitine (C20:4) measurement	106 South Asian	http://ftp.ebi.ac.uk/pub/databases/gwas/summary_statistics/GCST90203001-GCST90204000/GCST90203576	36635386
GCST90202577	Arachidonoylcarnitine (C20:4) levels	arachidonoylcarnitine (C20:4) measurement	104 East Asian	http://ftp.ebi.ac.uk/pub/databases/gwas/summary_statistics/GCST90202001-GCST90203000/GCST90202577	36635386
GCST90200150	Arachidonoylcarnitine (C20:4) levels	arachidonoylcarnitine (C20:4) measurement	8202 European	http://ftp.ebi.ac.uk/pub/databases/gwas/summary_statistics/GCST90200001-GCST90201000/GCST90200150	36635386
GCST90200086	Arachidonoylcholine levels	arachidonoylcholine measurement	8170 European	http://ftp.ebi.ac.uk/pub/databases/gwas/summary_statistics/GCST90200001-GCST90201000/GCST90200086	36635386
GCST90201494	Arachidonoylcholine levels	arachidonoylcholine measurement	60 African unspecified	http://ftp.ebi.ac.uk/pub/databases/gwas/summary_statistics/GCST90201001-GCST90202000/GCST90201494	36635386
GCST90203542	Arachidonoylcholine levels	arachidonoylcholine measurement	106 South Asian	http://ftp.ebi.ac.uk/pub/databases/gwas/summary_statistics/GCST90203001-GCST90204000/GCST90203542	36635386
GCST90202535	Arachidonoylcholine levels	arachidonoylcholine measurement	104 East Asian	http://ftp.ebi.ac.uk/pub/databases/gwas/summary_statistics/GCST90202001-GCST90203000/GCST90202535	36635386
GCST90201542	Arachidoylcarnitine (C20) levels	arachidoylcarnitine (C20) measurement	56 African unspecified	http://ftp.ebi.ac.uk/pub/databases/gwas/summary_statistics/GCST90201001-GCST90202000/GCST90201542	36635386
GCST90203571	Arachidoylcarnitine (C20) levels	arachidoylcarnitine (C20) measurement	98 South Asian	http://ftp.ebi.ac.uk/pub/databases/gwas/summary_statistics/GCST90203001-GCST90204000/GCST90203571	36635386
GCST90202580	Arachidoylcarnitine (C20) levels	arachidoylcarnitine (C20) measurement	103 East Asian	http://ftp.ebi.ac.uk/pub/databases/gwas/summary_statistics/GCST90202001-GCST90203000/GCST90202580	36635386
GCST90200135	Arachidoylcarnitine (C20) levels	arachidoylcarnitine (C20) measurement	7682 European	http://ftp.ebi.ac.uk/pub/databases/gwas/summary_statistics/GCST90200001-GCST90201000/GCST90200135	36635386
GCST90201316	Argininate levels	argininate measurement	59 African unspecified	http://ftp.ebi.ac.uk/pub/databases/gwas/summary_statistics/GCST90201001-GCST90202000/GCST90201316	36635386
GCST90202343	Argininate levels	argininate measurement	103 East Asian	http://ftp.ebi.ac.uk/pub/databases/gwas/summary_statistics/GCST90202001-GCST90203000/GCST90202343	36635386
GCST90199900	Argininate levels	argininate measurement	8226 European	http://ftp.ebi.ac.uk/pub/databases/gwas/summary_statistics/GCST90199001-GCST90200000/GCST90199900	36635386
GCST90203344	Argininate levels	argininate measurement	108 South Asian	http://ftp.ebi.ac.uk/pub/databases/gwas/summary_statistics/GCST90203001-GCST90204000/GCST90203344	36635386
GCST90202788	Arginine levels	arginine measurement	103 East Asian	http://ftp.ebi.ac.uk/pub/databases/gwas/summary_statistics/GCST90202001-GCST90203000/GCST90202788	36635386
GCST90203787	Arginine levels	arginine measurement	108 South Asian	http://ftp.ebi.ac.uk/pub/databases/gwas/summary_statistics/GCST90203001-GCST90204000/GCST90203787	36635386
GCST90200372	Arginine levels	arginine measurement	8237 European	http://ftp.ebi.ac.uk/pub/databases/gwas/summary_statistics/GCST90200001-GCST90201000/GCST90200372	36635386
GCST90201757	Arginine levels	arginine measurement	60 African unspecified	http://ftp.ebi.ac.uk/pub/databases/gwas/summary_statistics/GCST90201001-GCST90202000/GCST90201757	36635386
GCST90200743	Arginine to citrulline ratio	metabolite ratio	8192 European	http://ftp.ebi.ac.uk/pub/databases/gwas/summary_statistics/GCST90200001-GCST90201000/GCST90200743	36635386
GCST90200744	Arginine to glutamate ratio	metabolite ratio	8194 European	http://ftp.ebi.ac.uk/pub/databases/gwas/summary_statistics/GCST90200001-GCST90201000/GCST90200744	36635386
GCST90200735	Arginine to ornithine ratio	metabolite ratio	8250 European	http://ftp.ebi.ac.uk/pub/databases/gwas/summary_statistics/GCST90200001-GCST90201000/GCST90200735	36635386
GCST90200854	Arginine to phosphate ratio	metabolite ratio	8297 European	http://ftp.ebi.ac.uk/pub/databases/gwas/summary_statistics/GCST90200001-GCST90201000/GCST90200854	36635386
GCST90200094	Ascorbic acid 2-sulfate levels	ascorbic acid 2-sulfate measurement	8089 European	http://ftp.ebi.ac.uk/pub/databases/gwas/summary_statistics/GCST90200001-GCST90201000/GCST90200094	36635386
GCST90201493	Ascorbic acid 2-sulfate levels	ascorbic acid 2-sulfate measurement	57 African unspecified	http://ftp.ebi.ac.uk/pub/databases/gwas/summary_statistics/GCST90201001-GCST90202000/GCST90201493	36635386
GCST90203540	Ascorbic acid 2-sulfate levels	ascorbic acid 2-sulfate measurement	105 South Asian	http://ftp.ebi.ac.uk/pub/databases/gwas/summary_statistics/GCST90203001-GCST90204000/GCST90203540	36635386
GCST90202528	Ascorbic acid 2-sulfate levels	ascorbic acid 2-sulfate measurement	99 East Asian	http://ftp.ebi.ac.uk/pub/databases/gwas/summary_statistics/GCST90202001-GCST90203000/GCST90202528	36635386
GCST90201596	Ascorbic acid 3-sulfate levels	ascorbic acid 3-sulfate measurement	60 African unspecified	http://ftp.ebi.ac.uk/pub/databases/gwas/summary_statistics/GCST90201001-GCST90202000/GCST90201596	36635386
GCST90202648	Ascorbic acid 3-sulfate levels	ascorbic acid 3-sulfate measurement	102 East Asian	http://ftp.ebi.ac.uk/pub/databases/gwas/summary_statistics/GCST90202001-GCST90203000/GCST90202648	36635386
GCST90200199	Ascorbic acid 3-sulfate levels	ascorbic acid 3-sulfate measurement	8186 European	http://ftp.ebi.ac.uk/pub/databases/gwas/summary_statistics/GCST90200001-GCST90201000/GCST90200199	36635386
GCST90203620	Ascorbic acid 3-sulfate levels	ascorbic acid 3-sulfate measurement	107 South Asian	http://ftp.ebi.ac.uk/pub/databases/gwas/summary_statistics/GCST90203001-GCST90204000/GCST90203620	36635386
GCST90200452	Asparagine levels	asparagine measurement	8245 European	http://ftp.ebi.ac.uk/pub/databases/gwas/summary_statistics/GCST90200001-GCST90201000/GCST90200452	36635386
GCST90201836	Asparagine levels	asparagine measurement	60 African unspecified	http://ftp.ebi.ac.uk/pub/databases/gwas/summary_statistics/GCST90201001-GCST90202000/GCST90201836	36635386
GCST90203866	Asparagine levels	asparagine measurement	107 South Asian	http://ftp.ebi.ac.uk/pub/databases/gwas/summary_statistics/GCST90203001-GCST90204000/GCST90203866	36635386
GCST90202882	Asparagine levels	asparagine measurement	104 East Asian	http://ftp.ebi.ac.uk/pub/databases/gwas/summary_statistics/GCST90202001-GCST90203000/GCST90202882	36635386
GCST90202794	Aspartate levels	aspartate measurement	103 East Asian	http://ftp.ebi.ac.uk/pub/databases/gwas/summary_statistics/GCST90202001-GCST90203000/GCST90202794	36635386
GCST90203791	Aspartate levels	aspartate measurement	106 South Asian	http://ftp.ebi.ac.uk/pub/databases/gwas/summary_statistics/GCST90203001-GCST90204000/GCST90203791	36635386
GCST90200370	Aspartate levels	aspartate measurement	8253 European	http://ftp.ebi.ac.uk/pub/databases/gwas/summary_statistics/GCST90200001-GCST90201000/GCST90200370	36635386
GCST90201756	Aspartate levels	aspartate measurement	60 African unspecified	http://ftp.ebi.ac.uk/pub/databases/gwas/summary_statistics/GCST90201001-GCST90202000/GCST90201756	36635386
GCST90200750	Aspartate to asparagine ratio	metabolite ratio	8195 European	http://ftp.ebi.ac.uk/pub/databases/gwas/summary_statistics/GCST90200001-GCST90201000/GCST90200750	36635386
GCST90200742	Aspartate to citrate ratio	metabolite ratio	8191 European	http://ftp.ebi.ac.uk/pub/databases/gwas/summary_statistics/GCST90200001-GCST90201000/GCST90200742	36635386
GCST90200753	Aspartate to citrulline ratio	metabolite ratio	8139 European	http://ftp.ebi.ac.uk/pub/databases/gwas/summary_statistics/GCST90200001-GCST90201000/GCST90200753	36635386
GCST90200748	Aspartate to glutamate ratio	metabolite ratio	8190 European	http://ftp.ebi.ac.uk/pub/databases/gwas/summary_statistics/GCST90200001-GCST90201000/GCST90200748	36635386
GCST90200882	Aspartate to mannose ratio	metabolite ratio	8162 European	http://ftp.ebi.ac.uk/pub/databases/gwas/summary_statistics/GCST90200001-GCST90201000/GCST90200882	36635386
GCST90200881	Aspartate to N-acetylglucosamine to N-acetylgalactosamine ratio	metabolite ratio	7899 European	http://ftp.ebi.ac.uk/pub/databases/gwas/summary_statistics/GCST90200001-GCST90201000/GCST90200881	36635386
GCST90200844	Aspartate to phosphate ratio	metabolite ratio	8297 European	http://ftp.ebi.ac.uk/pub/databases/gwas/summary_statistics/GCST90200001-GCST90201000/GCST90200844	36635386
GCST90200059	Behenoyl dihydrosphingomyelin (d18:0/22:0) levels	behenoyl dihydrosphingomyelin (d18:0/22:0) measurement	8275 European	http://ftp.ebi.ac.uk/pub/databases/gwas/summary_statistics/GCST90200001-GCST90201000/GCST90200059	36635386
GCST90201469	Behenoyl dihydrosphingomyelin (d18:0/22:0) levels	behenoyl dihydrosphingomyelin (d18:0/22:0) measurement	60 African unspecified	http://ftp.ebi.ac.uk/pub/databases/gwas/summary_statistics/GCST90201001-GCST90202000/GCST90201469	36635386
GCST90203500	Behenoyl dihydrosphingomyelin (d18:0/22:0) levels	behenoyl dihydrosphingomyelin (d18:0/22:0) measurement	108 South Asian	http://ftp.ebi.ac.uk/pub/databases/gwas/summary_statistics/GCST90203001-GCST90204000/GCST90203500	36635386
GCST90202494	Behenoyl dihydrosphingomyelin (d18:0/22:0) levels	behenoyl dihydrosphingomyelin (d18:0/22:0) measurement	104 East Asian	http://ftp.ebi.ac.uk/pub/databases/gwas/summary_statistics/GCST90202001-GCST90203000/GCST90202494	36635386
GCST90199997	Behenoyl sphingomyelin (d18:1/22:0) levels	behenoyl sphingomyelin (d18:1/22:0) measurement	8260 European	http://ftp.ebi.ac.uk/pub/databases/gwas/summary_statistics/GCST90199001-GCST90200000/GCST90199997	36635386
GCST90201413	Behenoyl sphingomyelin (d18:1/22:0) levels	behenoyl sphingomyelin (d18:1/22:0) measurement	60 African unspecified	http://ftp.ebi.ac.uk/pub/databases/gwas/summary_statistics/GCST90201001-GCST90202000/GCST90201413	36635386
GCST90203442	Behenoyl sphingomyelin (d18:1/22:0) levels	behenoyl sphingomyelin (d18:1/22:0) measurement	107 South Asian	http://ftp.ebi.ac.uk/pub/databases/gwas/summary_statistics/GCST90203001-GCST90204000/GCST90203442	36635386
GCST90202457	Behenoyl sphingomyelin (d18:1/22:0) levels	behenoyl sphingomyelin (d18:1/22:0) measurement	103 East Asian	http://ftp.ebi.ac.uk/pub/databases/gwas/summary_statistics/GCST90202001-GCST90203000/GCST90202457	36635386
GCST90201543	Behenoylcarnitine (C22) levels	behenoylcarnitine (C22) measurement	47 African unspecified	http://ftp.ebi.ac.uk/pub/databases/gwas/summary_statistics/GCST90201001-GCST90202000/GCST90201543	36635386
GCST90203573	Behenoylcarnitine (C22) levels	behenoylcarnitine (C22) measurement	100 South Asian	http://ftp.ebi.ac.uk/pub/databases/gwas/summary_statistics/GCST90203001-GCST90204000/GCST90203573	36635386
GCST90202575	Behenoylcarnitine (C22) levels	behenoylcarnitine (C22) measurement	99 East Asian	http://ftp.ebi.ac.uk/pub/databases/gwas/summary_statistics/GCST90202001-GCST90203000/GCST90202575	36635386
GCST90200127	Behenoylcarnitine (C22) levels	behenoylcarnitine (C22) measurement	7368 European	http://ftp.ebi.ac.uk/pub/databases/gwas/summary_statistics/GCST90200001-GCST90201000/GCST90200127	36635386
GCST90201026	Benzoate levels	benzoate measurement	49 African unspecified	http://ftp.ebi.ac.uk/pub/databases/gwas/summary_statistics/GCST90201001-GCST90202000/GCST90201026	36635386
GCST90203094	Benzoate levels	benzoate measurement	99 South Asian	http://ftp.ebi.ac.uk/pub/databases/gwas/summary_statistics/GCST90203001-GCST90204000/GCST90203094	36635386
GCST90202056	Benzoate levels	benzoate measurement	95 East Asian	http://ftp.ebi.ac.uk/pub/databases/gwas/summary_statistics/GCST90202001-GCST90203000/GCST90202056	36635386
GCST90199622	Benzoate levels	benzoate measurement	7306 European	http://ftp.ebi.ac.uk/pub/databases/gwas/summary_statistics/GCST90199001-GCST90200000/GCST90199622	36635386
GCST90200988	Benzoate to linoleoyl-arachidonoyl-glycerol (18:2 to 20:4) [1] ratio	metabolite ratio	6813 European	http://ftp.ebi.ac.uk/pub/databases/gwas/summary_statistics/GCST90200001-GCST90201000/GCST90200988	36635386
GCST90200990	Benzoate to linoleoyl-arachidonoyl-glycerol (18:2 to 20:4) [2] ratio	metabolite ratio	6865 European	http://ftp.ebi.ac.uk/pub/databases/gwas/summary_statistics/GCST90200001-GCST90201000/GCST90200990	36635386
GCST90200987	Benzoate to oleoyl-linoleoyl-glycerol (18:1 to 18:2) [2] ratio	metabolite ratio	7162 European	http://ftp.ebi.ac.uk/pub/databases/gwas/summary_statistics/GCST90200001-GCST90201000/GCST90200987	36635386
GCST90202805	Beta-alanine levels	beta-alanine measurement	100 East Asian	http://ftp.ebi.ac.uk/pub/databases/gwas/summary_statistics/GCST90202001-GCST90203000/GCST90202805	36635386
GCST90203803	Beta-alanine levels	beta-alanine measurement	106 South Asian	http://ftp.ebi.ac.uk/pub/databases/gwas/summary_statistics/GCST90203001-GCST90204000/GCST90203803	36635386
GCST90200361	Beta-alanine levels	beta-alanine measurement	8114 European	http://ftp.ebi.ac.uk/pub/databases/gwas/summary_statistics/GCST90200001-GCST90201000/GCST90200361	36635386
GCST90201765	Beta-alanine levels	beta-alanine measurement	59 African unspecified	http://ftp.ebi.ac.uk/pub/databases/gwas/summary_statistics/GCST90201001-GCST90202000/GCST90201765	36635386
GCST90201326	Beta-citrylglutamate levels	beta-citrylglutamate measurement	60 African unspecified	http://ftp.ebi.ac.uk/pub/databases/gwas/summary_statistics/GCST90201001-GCST90202000/GCST90201326	36635386
GCST90202355	Beta-citrylglutamate levels	beta-citrylglutamate measurement	104 East Asian	http://ftp.ebi.ac.uk/pub/databases/gwas/summary_statistics/GCST90202001-GCST90203000/GCST90202355	36635386
GCST90199911	Beta-citrylglutamate levels	beta-citrylglutamate measurement	8226 European	http://ftp.ebi.ac.uk/pub/databases/gwas/summary_statistics/GCST90199001-GCST90200000/GCST90199911	36635386
GCST90203360	Beta-citrylglutamate levels	beta-citrylglutamate measurement	108 South Asian	http://ftp.ebi.ac.uk/pub/databases/gwas/summary_statistics/GCST90203001-GCST90204000/GCST90203360	36635386
GCST90203310	Beta-cryptoxanthin levels	cryptoxanthin measurement	108 South Asian	http://ftp.ebi.ac.uk/pub/databases/gwas/summary_statistics/GCST90203001-GCST90204000/GCST90203310	36635386
GCST90202294	Beta-cryptoxanthin levels	cryptoxanthin measurement	104 East Asian	http://ftp.ebi.ac.uk/pub/databases/gwas/summary_statistics/GCST90202001-GCST90203000/GCST90202294	36635386
GCST90199837	Beta-cryptoxanthin levels	cryptoxanthin measurement	8226 European	http://ftp.ebi.ac.uk/pub/databases/gwas/summary_statistics/GCST90199001-GCST90200000/GCST90199837	36635386
GCST90201249	Beta-cryptoxanthin levels	cryptoxanthin measurement	60 African unspecified	http://ftp.ebi.ac.uk/pub/databases/gwas/summary_statistics/GCST90201001-GCST90202000/GCST90201249	36635386
GCST90202786	Beta-hydroxyisovalerate levels	beta-hydroxyisovalerate measurement	102 East Asian	http://ftp.ebi.ac.uk/pub/databases/gwas/summary_statistics/GCST90202001-GCST90203000/GCST90202786	36635386
GCST90200322	Beta-hydroxyisovalerate levels	beta-hydroxyisovalerate measurement	8201 European	http://ftp.ebi.ac.uk/pub/databases/gwas/summary_statistics/GCST90200001-GCST90201000/GCST90200322	36635386
GCST90203761	Beta-hydroxyisovalerate levels	beta-hydroxyisovalerate measurement	106 South Asian	http://ftp.ebi.ac.uk/pub/databases/gwas/summary_statistics/GCST90203001-GCST90204000/GCST90203761	36635386
GCST90201746	Beta-hydroxyisovalerate levels	beta-hydroxyisovalerate measurement	59 African unspecified	http://ftp.ebi.ac.uk/pub/databases/gwas/summary_statistics/GCST90201001-GCST90202000/GCST90201746	36635386
GCST90203256	Beta-hydroxyisovaleroylcarnitine levels	beta-hydroxyisovaleroylcarnitine measurement	108 South Asian	http://ftp.ebi.ac.uk/pub/databases/gwas/summary_statistics/GCST90203001-GCST90204000/GCST90203256	36635386
GCST90202243	Beta-hydroxyisovaleroylcarnitine levels	beta-hydroxyisovaleroylcarnitine measurement	104 East Asian	http://ftp.ebi.ac.uk/pub/databases/gwas/summary_statistics/GCST90202001-GCST90203000/GCST90202243	36635386
GCST90199802	Beta-hydroxyisovaleroylcarnitine levels	beta-hydroxyisovaleroylcarnitine measurement	8232 European	http://ftp.ebi.ac.uk/pub/databases/gwas/summary_statistics/GCST90199001-GCST90200000/GCST90199802	36635386
GCST90201206	Beta-hydroxyisovaleroylcarnitine levels	beta-hydroxyisovaleroylcarnitine measurement	60 African unspecified	http://ftp.ebi.ac.uk/pub/databases/gwas/summary_statistics/GCST90201001-GCST90202000/GCST90201206	36635386
GCST90201843	Betaine levels	plasma betaine measurement	59 African unspecified	http://ftp.ebi.ac.uk/pub/databases/gwas/summary_statistics/GCST90201001-GCST90202000/GCST90201843	36635386
GCST90203856	Betaine levels	plasma betaine measurement	107 South Asian	http://ftp.ebi.ac.uk/pub/databases/gwas/summary_statistics/GCST90203001-GCST90204000/GCST90203856	36635386
GCST90200425	Betaine levels	plasma betaine measurement	8232 European	http://ftp.ebi.ac.uk/pub/databases/gwas/summary_statistics/GCST90200001-GCST90201000/GCST90200425	36635386
GCST90202867	Betaine levels	plasma betaine measurement	104 East Asian	http://ftp.ebi.ac.uk/pub/databases/gwas/summary_statistics/GCST90202001-GCST90203000/GCST90202867	36635386
GCST90200686	Bilirubin (E,E) levels	bilirubin measurement	8263 European	http://ftp.ebi.ac.uk/pub/databases/gwas/summary_statistics/GCST90200001-GCST90201000/GCST90200686	36635386
GCST90203302	Bilirubin (E,E) levels	bilirubin measurement	107 South Asian	http://ftp.ebi.ac.uk/pub/databases/gwas/summary_statistics/GCST90203001-GCST90204000/GCST90203302	36635386
GCST90202284	Bilirubin (E,E) levels	bilirubin measurement	104 East Asian	http://ftp.ebi.ac.uk/pub/databases/gwas/summary_statistics/GCST90202001-GCST90203000/GCST90202284	36635386
GCST90201240	Bilirubin (E,E) levels	bilirubin measurement	60 African unspecified	http://ftp.ebi.ac.uk/pub/databases/gwas/summary_statistics/GCST90201001-GCST90202000/GCST90201240	36635386
GCST90200687	Bilirubin (E,Z or Z,E) levels	bilirubin measurement	8238 European	http://ftp.ebi.ac.uk/pub/databases/gwas/summary_statistics/GCST90200001-GCST90201000/GCST90200687	36635386
GCST90203312	Bilirubin (E,Z or Z,E) levels	bilirubin measurement	106 South Asian	http://ftp.ebi.ac.uk/pub/databases/gwas/summary_statistics/GCST90203001-GCST90204000/GCST90203312	36635386
GCST90202265	Bilirubin (E,Z or Z,E) levels	bilirubin measurement	104 East Asian	http://ftp.ebi.ac.uk/pub/databases/gwas/summary_statistics/GCST90202001-GCST90203000/GCST90202265	36635386
GCST90201244	Bilirubin (E,Z or Z,E) levels	bilirubin measurement	60 African unspecified	http://ftp.ebi.ac.uk/pub/databases/gwas/summary_statistics/GCST90201001-GCST90202000/GCST90201244	36635386
GCST90200704	Bilirubin (z,z) levels	bilirubin measurement	8261 European	http://ftp.ebi.ac.uk/pub/databases/gwas/summary_statistics/GCST90200001-GCST90201000/GCST90200704	36635386
GCST90202728	Bilirubin (z,z) levels	bilirubin measurement	104 East Asian	http://ftp.ebi.ac.uk/pub/databases/gwas/summary_statistics/GCST90202001-GCST90203000/GCST90202728	36635386
GCST90203729	Bilirubin (z,z) levels	bilirubin measurement	107 South Asian	http://ftp.ebi.ac.uk/pub/databases/gwas/summary_statistics/GCST90203001-GCST90204000/GCST90203729	36635386
GCST90201693	Bilirubin (z,z) levels	bilirubin measurement	60 African unspecified	http://ftp.ebi.ac.uk/pub/databases/gwas/summary_statistics/GCST90201001-GCST90202000/GCST90201693	36635386
GCST90201015	Bilirubin (Z,Z) to androsterone glucuronide ratio	metabolite ratio	7888 European	http://ftp.ebi.ac.uk/pub/databases/gwas/summary_statistics/GCST90201001-GCST90202000/GCST90201015	36635386
GCST90201016	Bilirubin (Z,Z) to etiocholanolone glucuronide ratio	metabolite ratio	7707 European	http://ftp.ebi.ac.uk/pub/databases/gwas/summary_statistics/GCST90201001-GCST90202000/GCST90201016	36635386
GCST90201018	Bilirubin (Z,Z) to glucuronate ratio	metabolite ratio	8103 European	http://ftp.ebi.ac.uk/pub/databases/gwas/summary_statistics/GCST90201001-GCST90202000/GCST90201018	36635386
GCST90200829	Bilirubin (Z,Z) to taurocholate ratio	metabolite ratio	7620 European	http://ftp.ebi.ac.uk/pub/databases/gwas/summary_statistics/GCST90200001-GCST90201000/GCST90200829	36635386
GCST90202715	Bilirubin degradation product, C16H18N2O5 (1) levels	bilirubin measurement	102 East Asian	http://ftp.ebi.ac.uk/pub/databases/gwas/summary_statistics/GCST90202001-GCST90203000/GCST90202715	36635386
GCST90203706	Bilirubin degradation product, C16H18N2O5 (1) levels	bilirubin measurement	101 South Asian	http://ftp.ebi.ac.uk/pub/databases/gwas/summary_statistics/GCST90203001-GCST90204000/GCST90203706	36635386
GCST90200277	Bilirubin degradation product, C16H18N2O5 (1) levels	bilirubin measurement	7864 European	http://ftp.ebi.ac.uk/pub/databases/gwas/summary_statistics/GCST90200001-GCST90201000/GCST90200277	36635386
GCST90202713	Bilirubin degradation product, C16H18N2O5 (2) levels	bilirubin measurement	104 East Asian	http://ftp.ebi.ac.uk/pub/databases/gwas/summary_statistics/GCST90202001-GCST90203000/GCST90202713	36635386
GCST90203705	Bilirubin degradation product, C16H18N2O5 (2) levels	bilirubin measurement	107 South Asian	http://ftp.ebi.ac.uk/pub/databases/gwas/summary_statistics/GCST90203001-GCST90204000/GCST90203705	36635386
GCST90201678	Bilirubin degradation product, C16H18N2O5 (2) levels	bilirubin measurement	59 African unspecified	http://ftp.ebi.ac.uk/pub/databases/gwas/summary_statistics/GCST90201001-GCST90202000/GCST90201678	36635386
GCST90200275	Bilirubin degradation product, C16H18N2O5 (2) levels	bilirubin measurement	8252 European	http://ftp.ebi.ac.uk/pub/databases/gwas/summary_statistics/GCST90200001-GCST90201000/GCST90200275	36635386
GCST90202714	Bilirubin degradation product, C16H18N2O5 (3) levels	bilirubin measurement	101 East Asian	http://ftp.ebi.ac.uk/pub/databases/gwas/summary_statistics/GCST90202001-GCST90203000/GCST90202714	36635386
GCST90203712	Bilirubin degradation product, C16H18N2O5 (3) levels	bilirubin measurement	103 South Asian	http://ftp.ebi.ac.uk/pub/databases/gwas/summary_statistics/GCST90203001-GCST90204000/GCST90203712	36635386
GCST90201672	Bilirubin degradation product, C16H18N2O5 (3) levels	bilirubin measurement	58 African unspecified	http://ftp.ebi.ac.uk/pub/databases/gwas/summary_statistics/GCST90201001-GCST90202000/GCST90201672	36635386
GCST90200271	Bilirubin degradation product, C16H18N2O5 (3) levels	bilirubin measurement	7970 European	http://ftp.ebi.ac.uk/pub/databases/gwas/summary_statistics/GCST90200001-GCST90201000/GCST90200271	36635386
GCST90202712	Bilirubin degradation product, C16H18N2O5 (4) levels	bilirubin measurement	104 East Asian	http://ftp.ebi.ac.uk/pub/databases/gwas/summary_statistics/GCST90202001-GCST90203000/GCST90202712	36635386
GCST90203713	Bilirubin degradation product, C16H18N2O5 (4) levels	bilirubin measurement	106 South Asian	http://ftp.ebi.ac.uk/pub/databases/gwas/summary_statistics/GCST90203001-GCST90204000/GCST90203713	36635386
GCST90201680	Bilirubin degradation product, C16H18N2O5 (4) levels	bilirubin measurement	58 African unspecified	http://ftp.ebi.ac.uk/pub/databases/gwas/summary_statistics/GCST90201001-GCST90202000/GCST90201680	36635386
GCST90200265	Bilirubin degradation product, C16H18N2O5 (4) levels	bilirubin measurement	8159 European	http://ftp.ebi.ac.uk/pub/databases/gwas/summary_statistics/GCST90200001-GCST90201000/GCST90200265	36635386
GCST90200701	Bilirubin degradation product, C17H18N2O4 (1) levels	bilirubin measurement	8254 European	http://ftp.ebi.ac.uk/pub/databases/gwas/summary_statistics/GCST90200001-GCST90201000/GCST90200701	36635386
GCST90202719	Bilirubin degradation product, C17H18N2O4 (1) levels	bilirubin measurement	103 East Asian	http://ftp.ebi.ac.uk/pub/databases/gwas/summary_statistics/GCST90202001-GCST90203000/GCST90202719	36635386
GCST90203704	Bilirubin degradation product, C17H18N2O4 (1) levels	bilirubin measurement	106 South Asian	http://ftp.ebi.ac.uk/pub/databases/gwas/summary_statistics/GCST90203001-GCST90204000/GCST90203704	36635386
GCST90201685	Bilirubin degradation product, C17H18N2O4 (1) levels	bilirubin measurement	60 African unspecified	http://ftp.ebi.ac.uk/pub/databases/gwas/summary_statistics/GCST90201001-GCST90202000/GCST90201685	36635386
GCST90200702	Bilirubin degradation product, C17H18N2O4 (2) levels	bilirubin measurement	8255 European	http://ftp.ebi.ac.uk/pub/databases/gwas/summary_statistics/GCST90200001-GCST90201000/GCST90200702	36635386
GCST90202727	Bilirubin degradation product, C17H18N2O4 (2) levels	bilirubin measurement	103 East Asian	http://ftp.ebi.ac.uk/pub/databases/gwas/summary_statistics/GCST90202001-GCST90203000/GCST90202727	36635386
GCST90203708	Bilirubin degradation product, C17H18N2O4 (2) levels	bilirubin measurement	107 South Asian	http://ftp.ebi.ac.uk/pub/databases/gwas/summary_statistics/GCST90203001-GCST90204000/GCST90203708	36635386
GCST90201679	Bilirubin degradation product, C17H18N2O4 (2) levels	bilirubin measurement	60 African unspecified	http://ftp.ebi.ac.uk/pub/databases/gwas/summary_statistics/GCST90201001-GCST90202000/GCST90201679	36635386
GCST90200703	Bilirubin degradation product, C17H18N2O4 (3) levels	bilirubin measurement	8253 European	http://ftp.ebi.ac.uk/pub/databases/gwas/summary_statistics/GCST90200001-GCST90201000/GCST90200703	36635386
GCST90202708	Bilirubin degradation product, C17H18N2O4 (3) levels	bilirubin measurement	104 East Asian	http://ftp.ebi.ac.uk/pub/databases/gwas/summary_statistics/GCST90202001-GCST90203000/GCST90202708	36635386
GCST90201681	Bilirubin degradation product, C17H18N2O4 (3) levels	bilirubin measurement	60 African unspecified	http://ftp.ebi.ac.uk/pub/databases/gwas/summary_statistics/GCST90201001-GCST90202000/GCST90201681	36635386
GCST90203702	Bilirubin degradation product, C17H18N2O4 (3) levels	bilirubin measurement	108 South Asian	http://ftp.ebi.ac.uk/pub/databases/gwas/summary_statistics/GCST90203001-GCST90204000/GCST90203702	36635386
GCST90202709	Bilirubin degradation product, C17H20N2O5 (1) levels	bilirubin measurement	103 East Asian	http://ftp.ebi.ac.uk/pub/databases/gwas/summary_statistics/GCST90202001-GCST90203000/GCST90202709	36635386
GCST90203709	Bilirubin degradation product, C17H20N2O5 (1) levels	bilirubin measurement	108 South Asian	http://ftp.ebi.ac.uk/pub/databases/gwas/summary_statistics/GCST90203001-GCST90204000/GCST90203709	36635386
GCST90201675	Bilirubin degradation product, C17H20N2O5 (1) levels	bilirubin measurement	60 African unspecified	http://ftp.ebi.ac.uk/pub/databases/gwas/summary_statistics/GCST90201001-GCST90202000/GCST90201675	36635386
GCST90200269	Bilirubin degradation product, C17H20N2O5 (1) levels	bilirubin measurement	8252 European	http://ftp.ebi.ac.uk/pub/databases/gwas/summary_statistics/GCST90200001-GCST90201000/GCST90200269	36635386
GCST90202711	Bilirubin degradation product, C17H20N2O5 (2) levels	bilirubin measurement	104 East Asian	http://ftp.ebi.ac.uk/pub/databases/gwas/summary_statistics/GCST90202001-GCST90203000/GCST90202711	36635386
GCST90203710	Bilirubin degradation product, C17H20N2O5 (2) levels	bilirubin measurement	108 South Asian	http://ftp.ebi.ac.uk/pub/databases/gwas/summary_statistics/GCST90203001-GCST90204000/GCST90203710	36635386
GCST90201683	Bilirubin degradation product, C17H20N2O5 (2) levels	bilirubin measurement	60 African unspecified	http://ftp.ebi.ac.uk/pub/databases/gwas/summary_statistics/GCST90201001-GCST90202000/GCST90201683	36635386
GCST90200264	Bilirubin degradation product, C17H20N2O5 (2) levels	bilirubin measurement	8254 European	http://ftp.ebi.ac.uk/pub/databases/gwas/summary_statistics/GCST90200001-GCST90201000/GCST90200264	36635386
GCST90200706	Biliverdin levels	biliverdin measurement	8262 European	http://ftp.ebi.ac.uk/pub/databases/gwas/summary_statistics/GCST90200001-GCST90201000/GCST90200706	36635386
GCST90201772	Biliverdin levels	biliverdin measurement	59 African unspecified	http://ftp.ebi.ac.uk/pub/databases/gwas/summary_statistics/GCST90201001-GCST90202000/GCST90201772	36635386
GCST90202791	Biliverdin levels	biliverdin measurement	104 East Asian	http://ftp.ebi.ac.uk/pub/databases/gwas/summary_statistics/GCST90202001-GCST90203000/GCST90202791	36635386
GCST90203796	Biliverdin levels	biliverdin measurement	107 South Asian	http://ftp.ebi.ac.uk/pub/databases/gwas/summary_statistics/GCST90203001-GCST90204000/GCST90203796	36635386
GCST90202681	Branched chain 14:0 dicarboxylic acid levels	branched chain 14:0 dicarboxylic acid measurement	94 East Asian	http://ftp.ebi.ac.uk/pub/databases/gwas/summary_statistics/GCST90202001-GCST90203000/GCST90202681	36635386
GCST90201656	Branched chain 14:0 dicarboxylic acid levels	branched chain 14:0 dicarboxylic acid measurement	58 African unspecified	http://ftp.ebi.ac.uk/pub/databases/gwas/summary_statistics/GCST90201001-GCST90202000/GCST90201656	36635386
GCST90200260	Branched chain 14:0 dicarboxylic acid levels	branched chain 14:0 dicarboxylic acid measurement	7990 European	http://ftp.ebi.ac.uk/pub/databases/gwas/summary_statistics/GCST90200001-GCST90201000/GCST90200260	36635386
GCST90203687	Branched chain 14:0 dicarboxylic acid levels	branched chain 14:0 dicarboxylic acid measurement	104 South Asian	http://ftp.ebi.ac.uk/pub/databases/gwas/summary_statistics/GCST90203001-GCST90204000/GCST90203687	36635386
GCST90202690	Branched-chain, straight-chain, or cyclopropyl 10:1 fatty acid (1) levels	branched-chain, straight-chain, or cyclopropyl 10:1 fatty acid (1) measurement	104 East Asian	http://ftp.ebi.ac.uk/pub/databases/gwas/summary_statistics/GCST90202001-GCST90203000/GCST90202690	36635386
GCST90201664	Branched-chain, straight-chain, or cyclopropyl 10:1 fatty acid (1) levels	branched-chain, straight-chain, or cyclopropyl 10:1 fatty acid (1) measurement	60 African unspecified	http://ftp.ebi.ac.uk/pub/databases/gwas/summary_statistics/GCST90201001-GCST90202000/GCST90201664	36635386
GCST90200251	Branched-chain, straight-chain, or cyclopropyl 10:1 fatty acid (1) levels	branched-chain, straight-chain, or cyclopropyl 10:1 fatty acid (1) measurement	8265 European	http://ftp.ebi.ac.uk/pub/databases/gwas/summary_statistics/GCST90200001-GCST90201000/GCST90200251	36635386
GCST90202706	Branched-chain, straight-chain, or cyclopropyl 12:1 fatty acid levels	branched-chain, straight-chain, or cyclopropyl 12:1 fatty acid measurement	103 East Asian	http://ftp.ebi.ac.uk/pub/databases/gwas/summary_statistics/GCST90202001-GCST90203000/GCST90202706	36635386
GCST90201659	Branched-chain, straight-chain, or cyclopropyl 12:1 fatty acid levels	branched-chain, straight-chain, or cyclopropyl 12:1 fatty acid measurement	60 African unspecified	http://ftp.ebi.ac.uk/pub/databases/gwas/summary_statistics/GCST90201001-GCST90202000/GCST90201659	36635386
GCST90200249	Branched-chain, straight-chain, or cyclopropyl 12:1 fatty acid levels	branched-chain, straight-chain, or cyclopropyl 12:1 fatty acid measurement	8256 European	http://ftp.ebi.ac.uk/pub/databases/gwas/summary_statistics/GCST90200001-GCST90201000/GCST90200249	36635386
GCST90203694	Branched-chain, straight-chain, or cyclopropyl 12:1 fatty acid levels	branched-chain, straight-chain, or cyclopropyl 12:1 fatty acid measurement	108 South Asian	http://ftp.ebi.ac.uk/pub/databases/gwas/summary_statistics/GCST90203001-GCST90204000/GCST90203694	36635386
GCST90202767	Butyrate/isobutyrate (4:0) levels	isobutyrate (4:0) measurement	101 East Asian	http://ftp.ebi.ac.uk/pub/databases/gwas/summary_statistics/GCST90202001-GCST90203000/GCST90202767	36635386
GCST90203747	Butyrate/isobutyrate (4:0) levels	isobutyrate (4:0) measurement	105 South Asian	http://ftp.ebi.ac.uk/pub/databases/gwas/summary_statistics/GCST90203001-GCST90204000/GCST90203747	36635386
GCST90201722	Butyrate/isobutyrate (4:0) levels	isobutyrate (4:0) measurement	60 African unspecified	http://ftp.ebi.ac.uk/pub/databases/gwas/summary_statistics/GCST90201001-GCST90202000/GCST90201722	36635386
GCST90200306	Butyrate/isobutyrate (4:0) levels	isobutyrate (4:0) measurement	8004 European	http://ftp.ebi.ac.uk/pub/databases/gwas/summary_statistics/GCST90200001-GCST90201000/GCST90200306	36635386
GCST90200673	Butyrylcarnitine (C4) levels	butyrylcarnitine (C4) measurement	8111 European	http://ftp.ebi.ac.uk/pub/databases/gwas/summary_statistics/GCST90200001-GCST90201000/GCST90200673	36635386
GCST90202134	Butyrylcarnitine (C4) levels	butyrylcarnitine (C4) measurement	101 East Asian	http://ftp.ebi.ac.uk/pub/databases/gwas/summary_statistics/GCST90202001-GCST90203000/GCST90202134	36635386
GCST90201093	Butyrylcarnitine (C4) levels	butyrylcarnitine (C4) measurement	58 African unspecified	http://ftp.ebi.ac.uk/pub/databases/gwas/summary_statistics/GCST90201001-GCST90202000/GCST90201093	36635386
GCST90203164	Butyrylcarnitine (C4) levels	butyrylcarnitine (C4) measurement	104 South Asian	http://ftp.ebi.ac.uk/pub/databases/gwas/summary_statistics/GCST90203001-GCST90204000/GCST90203164	36635386
GCST90201106	Butyrylglycine levels	butyrylglycine measurement	37 African unspecified	http://ftp.ebi.ac.uk/pub/databases/gwas/summary_statistics/GCST90201001-GCST90202000/GCST90201106	36635386
GCST90202138	Butyrylglycine levels	butyrylglycine measurement	69 East Asian	http://ftp.ebi.ac.uk/pub/databases/gwas/summary_statistics/GCST90202001-GCST90203000/GCST90202138	36635386
GCST90199706	Butyrylglycine levels	butyrylglycine measurement	6044 European	http://ftp.ebi.ac.uk/pub/databases/gwas/summary_statistics/GCST90199001-GCST90200000/GCST90199706	36635386
GCST90203161	Butyrylglycine levels	butyrylglycine measurement	69 South Asian	http://ftp.ebi.ac.uk/pub/databases/gwas/summary_statistics/GCST90203001-GCST90204000/GCST90203161	36635386
GCST90200093	Caffeic acid sulfate levels	caffeic acid sulfate measurement	7798 European	http://ftp.ebi.ac.uk/pub/databases/gwas/summary_statistics/GCST90200001-GCST90201000/GCST90200093	36635386
GCST90201503	Caffeic acid sulfate levels	caffeic acid sulfate measurement	54 African unspecified	http://ftp.ebi.ac.uk/pub/databases/gwas/summary_statistics/GCST90201001-GCST90202000/GCST90201503	36635386
GCST90203539	Caffeic acid sulfate levels	caffeic acid sulfate measurement	104 South Asian	http://ftp.ebi.ac.uk/pub/databases/gwas/summary_statistics/GCST90203001-GCST90204000/GCST90203539	36635386
GCST90202538	Caffeic acid sulfate levels	caffeic acid sulfate measurement	97 East Asian	http://ftp.ebi.ac.uk/pub/databases/gwas/summary_statistics/GCST90202001-GCST90203000/GCST90202538	36635386
GCST90200436	Caffeine levels	caffeine measurement	8005 European	http://ftp.ebi.ac.uk/pub/databases/gwas/summary_statistics/GCST90200001-GCST90201000/GCST90200436	36635386
GCST90203869	Caffeine levels	caffeine measurement	100 South Asian	http://ftp.ebi.ac.uk/pub/databases/gwas/summary_statistics/GCST90203001-GCST90204000/GCST90203869	36635386
GCST90202870	Caffeine levels	caffeine measurement	99 East Asian	http://ftp.ebi.ac.uk/pub/databases/gwas/summary_statistics/GCST90202001-GCST90203000/GCST90202870	36635386
GCST90200981	Caffeine to linoleate (18:2n6) ratio	metabolite ratio	7939 European	http://ftp.ebi.ac.uk/pub/databases/gwas/summary_statistics/GCST90200001-GCST90201000/GCST90200981	36635386
GCST90200978	Caffeine to paraxanthine ratio	metabolite ratio	7873 European	http://ftp.ebi.ac.uk/pub/databases/gwas/summary_statistics/GCST90200001-GCST90201000/GCST90200978	36635386
GCST90200925	Caffeine to theobromine ratio	metabolite ratio	7952 European	http://ftp.ebi.ac.uk/pub/databases/gwas/summary_statistics/GCST90200001-GCST90201000/GCST90200925	36635386
GCST90200919	Caffeine to theophylline ratio	metabolite ratio	7756 European	http://ftp.ebi.ac.uk/pub/databases/gwas/summary_statistics/GCST90200001-GCST90201000/GCST90200919	36635386
GCST90203211	Campesterol levels	campesterol measurement	69 South Asian	http://ftp.ebi.ac.uk/pub/databases/gwas/summary_statistics/GCST90203001-GCST90204000/GCST90203211	36635386
GCST90202163	Campesterol levels	campesterol measurement	83 East Asian	http://ftp.ebi.ac.uk/pub/databases/gwas/summary_statistics/GCST90202001-GCST90203000/GCST90202163	36635386
GCST90199725	Campesterol levels	campesterol measurement	5300 European	http://ftp.ebi.ac.uk/pub/databases/gwas/summary_statistics/GCST90199001-GCST90200000/GCST90199725	36635386
GCST90201132	Campesterol levels	campesterol measurement	47 African unspecified	http://ftp.ebi.ac.uk/pub/databases/gwas/summary_statistics/GCST90201001-GCST90202000/GCST90201132	36635386
GCST90201838	Caprate (10:0) levels	caprate 10:0 measurement	60 African unspecified	http://ftp.ebi.ac.uk/pub/databases/gwas/summary_statistics/GCST90201001-GCST90202000/GCST90201838	36635386
GCST90200428	Caprate (10:0) levels	caprate 10:0 measurement	8272 European	http://ftp.ebi.ac.uk/pub/databases/gwas/summary_statistics/GCST90200001-GCST90201000/GCST90200428	36635386
GCST90202868	Caprate (10:0) levels	caprate 10:0 measurement	103 East Asian	http://ftp.ebi.ac.uk/pub/databases/gwas/summary_statistics/GCST90202001-GCST90203000/GCST90202868	36635386
GCST90200450	Caproate (6:0) levels	caproate 6:0 measurement	7564 European	http://ftp.ebi.ac.uk/pub/databases/gwas/summary_statistics/GCST90200001-GCST90201000/GCST90200450	36635386
GCST90201856	Caproate (6:0) levels	caproate 6:0 measurement	53 African unspecified	http://ftp.ebi.ac.uk/pub/databases/gwas/summary_statistics/GCST90201001-GCST90202000/GCST90201856	36635386
GCST90202886	Caproate (6:0) levels	caproate 6:0 measurement	100 East Asian	http://ftp.ebi.ac.uk/pub/databases/gwas/summary_statistics/GCST90202001-GCST90203000/GCST90202886	36635386
GCST90200445	Caprylate (8:0) levels	caprylate 8:0 measurement	8163 European	http://ftp.ebi.ac.uk/pub/databases/gwas/summary_statistics/GCST90200001-GCST90201000/GCST90200445	36635386
GCST90201851	Caprylate (8:0) levels	caprylate 8:0 measurement	58 African unspecified	http://ftp.ebi.ac.uk/pub/databases/gwas/summary_statistics/GCST90201001-GCST90202000/GCST90201851	36635386
GCST90202892	Caprylate (8:0) levels	caprylate 8:0 measurement	102 East Asian	http://ftp.ebi.ac.uk/pub/databases/gwas/summary_statistics/GCST90202001-GCST90203000/GCST90202892	36635386
GCST90201320	Carboxyethyl-gaba levels	carboxyethyl-GABA measurement	57 African unspecified	http://ftp.ebi.ac.uk/pub/databases/gwas/summary_statistics/GCST90201001-GCST90202000/GCST90201320	36635386
GCST90202351	Carboxyethyl-gaba levels	carboxyethyl-GABA measurement	98 East Asian	http://ftp.ebi.ac.uk/pub/databases/gwas/summary_statistics/GCST90202001-GCST90203000/GCST90202351	36635386
GCST90199918	Carboxyethyl-gaba levels	carboxyethyl-GABA measurement	8090 European	http://ftp.ebi.ac.uk/pub/databases/gwas/summary_statistics/GCST90199001-GCST90200000/GCST90199918	36635386
GCST90203361	Carboxyethyl-gaba levels	carboxyethyl-GABA measurement	104 South Asian	http://ftp.ebi.ac.uk/pub/databases/gwas/summary_statistics/GCST90203001-GCST90204000/GCST90203361	36635386
GCST90201306	Carnitine C18:2 levels	linoleoylcarnitine (C18:2) measurement	60 African unspecified	http://ftp.ebi.ac.uk/pub/databases/gwas/summary_statistics/GCST90201001-GCST90202000/GCST90201306	36635386
GCST90202354	Carnitine C18:2 levels	linoleoylcarnitine (C18:2) measurement	104 East Asian	http://ftp.ebi.ac.uk/pub/databases/gwas/summary_statistics/GCST90202001-GCST90203000/GCST90202354	36635386
GCST90199916	Carnitine C18:2 levels	linoleoylcarnitine (C18:2) measurement	8268 European	http://ftp.ebi.ac.uk/pub/databases/gwas/summary_statistics/GCST90199001-GCST90200000/GCST90199916	36635386
GCST90203356	Carnitine C18:2 levels	linoleoylcarnitine (C18:2) measurement	107 South Asian	http://ftp.ebi.ac.uk/pub/databases/gwas/summary_statistics/GCST90203001-GCST90204000/GCST90203356	36635386
GCST90201021	Carnitine levels	carnitine measurement	58 African unspecified	http://ftp.ebi.ac.uk/pub/databases/gwas/summary_statistics/GCST90201001-GCST90202000/GCST90201021	36635386
GCST90203093	Carnitine levels	carnitine measurement	107 South Asian	http://ftp.ebi.ac.uk/pub/databases/gwas/summary_statistics/GCST90203001-GCST90204000/GCST90203093	36635386
GCST90202055	Carnitine levels	carnitine measurement	101 East Asian	http://ftp.ebi.ac.uk/pub/databases/gwas/summary_statistics/GCST90202001-GCST90203000/GCST90202055	36635386
GCST90199621	Carnitine levels	carnitine measurement	8192 European	http://ftp.ebi.ac.uk/pub/databases/gwas/summary_statistics/GCST90199001-GCST90200000/GCST90199621	36635386
GCST90200930	Carnitine to acetylcarnitine (C2) ratio	metabolite ratio	8206 European	http://ftp.ebi.ac.uk/pub/databases/gwas/summary_statistics/GCST90200001-GCST90201000/GCST90200930	36635386
GCST90200807	Carnitine to ergothioneine ratio	metabolite ratio	8110 European	http://ftp.ebi.ac.uk/pub/databases/gwas/summary_statistics/GCST90200001-GCST90201000/GCST90200807	36635386
GCST90200792	Carnitine to palmitoylcarnitine (C16) ratio	metabolite ratio	8146 European	http://ftp.ebi.ac.uk/pub/databases/gwas/summary_statistics/GCST90200001-GCST90201000/GCST90200792	36635386
GCST90200935	Carnitine to propionylcarnitine (C3) ratio	metabolite ratio	8185 European	http://ftp.ebi.ac.uk/pub/databases/gwas/summary_statistics/GCST90200001-GCST90201000/GCST90200935	36635386
GCST90201550	Carotene diol (1) levels	carotene diol (1) measurement	60 African unspecified	http://ftp.ebi.ac.uk/pub/databases/gwas/summary_statistics/GCST90201001-GCST90202000/GCST90201550	36635386
GCST90203584	Carotene diol (1) levels	carotene diol (1) measurement	108 South Asian	http://ftp.ebi.ac.uk/pub/databases/gwas/summary_statistics/GCST90203001-GCST90204000/GCST90203584	36635386
GCST90202586	Carotene diol (1) levels	carotene diol (1) measurement	103 East Asian	http://ftp.ebi.ac.uk/pub/databases/gwas/summary_statistics/GCST90202001-GCST90203000/GCST90202586	36635386
GCST90200142	Carotene diol (1) levels	carotene diol (1) measurement	8256 European	http://ftp.ebi.ac.uk/pub/databases/gwas/summary_statistics/GCST90200001-GCST90201000/GCST90200142	36635386
GCST90201552	Carotene diol (2) levels	carotene diol (2) measurement	60 African unspecified	http://ftp.ebi.ac.uk/pub/databases/gwas/summary_statistics/GCST90201001-GCST90202000/GCST90201552	36635386
GCST90203587	Carotene diol (2) levels	carotene diol (2) measurement	108 South Asian	http://ftp.ebi.ac.uk/pub/databases/gwas/summary_statistics/GCST90203001-GCST90204000/GCST90203587	36635386
GCST90202584	Carotene diol (2) levels	carotene diol (2) measurement	104 East Asian	http://ftp.ebi.ac.uk/pub/databases/gwas/summary_statistics/GCST90202001-GCST90203000/GCST90202584	36635386
GCST90200140	Carotene diol (2) levels	carotene diol (2) measurement	8196 European	http://ftp.ebi.ac.uk/pub/databases/gwas/summary_statistics/GCST90200001-GCST90201000/GCST90200140	36635386
GCST90201556	Carotene diol (3) levels	carotene diol (3) measurement	55 African unspecified	http://ftp.ebi.ac.uk/pub/databases/gwas/summary_statistics/GCST90201001-GCST90202000/GCST90201556	36635386
GCST90203585	Carotene diol (3) levels	carotene diol (3) measurement	99 South Asian	http://ftp.ebi.ac.uk/pub/databases/gwas/summary_statistics/GCST90203001-GCST90204000/GCST90203585	36635386
GCST90202602	Carotene diol (3) levels	carotene diol (3) measurement	94 East Asian	http://ftp.ebi.ac.uk/pub/databases/gwas/summary_statistics/GCST90202001-GCST90203000/GCST90202602	36635386
GCST90200157	Carotene diol (3) levels	carotene diol (3) measurement	7650 European	http://ftp.ebi.ac.uk/pub/databases/gwas/summary_statistics/GCST90200001-GCST90201000/GCST90200157	36635386
GCST90200096	Catechol glucuronide levels	catechol glucuronide measurement	4698 European	http://ftp.ebi.ac.uk/pub/databases/gwas/summary_statistics/GCST90200001-GCST90201000/GCST90200096	36635386
GCST90203260	Catechol sulfate levels	catechol sulfate measurement	107 South Asian	http://ftp.ebi.ac.uk/pub/databases/gwas/summary_statistics/GCST90203001-GCST90204000/GCST90203260	36635386
GCST90202239	Catechol sulfate levels	catechol sulfate measurement	102 East Asian	http://ftp.ebi.ac.uk/pub/databases/gwas/summary_statistics/GCST90202001-GCST90203000/GCST90202239	36635386
GCST90199803	Catechol sulfate levels	catechol sulfate measurement	8242 European	http://ftp.ebi.ac.uk/pub/databases/gwas/summary_statistics/GCST90199001-GCST90200000/GCST90199803	36635386
GCST90201223	Catechol sulfate levels	catechol sulfate measurement	60 African unspecified	http://ftp.ebi.ac.uk/pub/databases/gwas/summary_statistics/GCST90201001-GCST90202000/GCST90201223	36635386
GCST90201519	Ceramide (d18:1/14:0, d16:1/16:0) levels	ceramide measurement	47 African unspecified	http://ftp.ebi.ac.uk/pub/databases/gwas/summary_statistics/GCST90201001-GCST90202000/GCST90201519	36635386
GCST90203570	Ceramide (d18:1/14:0, d16:1/16:0) levels	ceramide measurement	91 South Asian	http://ftp.ebi.ac.uk/pub/databases/gwas/summary_statistics/GCST90203001-GCST90204000/GCST90203570	36635386
GCST90202560	Ceramide (d18:1/14:0, d16:1/16:0) levels	ceramide measurement	86 East Asian	http://ftp.ebi.ac.uk/pub/databases/gwas/summary_statistics/GCST90202001-GCST90203000/GCST90202560	36635386
GCST90200116	Ceramide (d18:1/14:0, d16:1/16:0) levels	ceramide measurement	7270 European	http://ftp.ebi.ac.uk/pub/databases/gwas/summary_statistics/GCST90200001-GCST90201000/GCST90200116	36635386
GCST90201520	Ceramide (d18:1/17:0, d17:1/18:0) levels	ceramide measurement	41 African unspecified	http://ftp.ebi.ac.uk/pub/databases/gwas/summary_statistics/GCST90201001-GCST90202000/GCST90201520	36635386
GCST90203552	Ceramide (d18:1/17:0, d17:1/18:0) levels	ceramide measurement	69 South Asian	http://ftp.ebi.ac.uk/pub/databases/gwas/summary_statistics/GCST90203001-GCST90204000/GCST90203552	36635386
GCST90202557	Ceramide (d18:1/17:0, d17:1/18:0) levels	ceramide measurement	75 East Asian	http://ftp.ebi.ac.uk/pub/databases/gwas/summary_statistics/GCST90202001-GCST90203000/GCST90202557	36635386
GCST90200121	Ceramide (d18:1/17:0, d17:1/18:0) levels	ceramide measurement	6073 European	http://ftp.ebi.ac.uk/pub/databases/gwas/summary_statistics/GCST90200001-GCST90201000/GCST90200121	36635386
GCST90201545	Cerotoylcarnitine (C26) levels	cerotoylcarnitine (C26) measurement	59 African unspecified	http://ftp.ebi.ac.uk/pub/databases/gwas/summary_statistics/GCST90201001-GCST90202000/GCST90201545	36635386
GCST90203581	Cerotoylcarnitine (C26) levels	cerotoylcarnitine (C26) measurement	108 South Asian	http://ftp.ebi.ac.uk/pub/databases/gwas/summary_statistics/GCST90203001-GCST90204000/GCST90203581	36635386
GCST90202576	Cerotoylcarnitine (C26) levels	cerotoylcarnitine (C26) measurement	104 East Asian	http://ftp.ebi.ac.uk/pub/databases/gwas/summary_statistics/GCST90202001-GCST90203000/GCST90202576	36635386
GCST90200136	Cerotoylcarnitine (C26) levels	cerotoylcarnitine (C26) measurement	8266 European	http://ftp.ebi.ac.uk/pub/databases/gwas/summary_statistics/GCST90200001-GCST90201000/GCST90200136	36635386
GCST90200008	C-glycosyltryptophan levels	C-glycosyltryptophan measurement	8204 European	http://ftp.ebi.ac.uk/pub/databases/gwas/summary_statistics/GCST90200001-GCST90201000/GCST90200008	36635386
GCST90201432	C-glycosyltryptophan levels	C-glycosyltryptophan measurement	60 African unspecified	http://ftp.ebi.ac.uk/pub/databases/gwas/summary_statistics/GCST90201001-GCST90202000/GCST90201432	36635386
GCST90202459	C-glycosyltryptophan levels	C-glycosyltryptophan measurement	102 East Asian	http://ftp.ebi.ac.uk/pub/databases/gwas/summary_statistics/GCST90202001-GCST90203000/GCST90202459	36635386
GCST90202269	Chiro-inositol levels	chiro-inositol measurement	64 East Asian	http://ftp.ebi.ac.uk/pub/databases/gwas/summary_statistics/GCST90202001-GCST90203000/GCST90202269	36635386
GCST90199843	Chiro-inositol levels	chiro-inositol measurement	4429 European	http://ftp.ebi.ac.uk/pub/databases/gwas/summary_statistics/GCST90199001-GCST90200000/GCST90199843	36635386
GCST90201245	Chiro-inositol levels	chiro-inositol measurement	31 African unspecified	http://ftp.ebi.ac.uk/pub/databases/gwas/summary_statistics/GCST90201001-GCST90202000/GCST90201245	36635386
GCST90202764	Cholate levels	cholate measurement	101 East Asian	http://ftp.ebi.ac.uk/pub/databases/gwas/summary_statistics/GCST90202001-GCST90203000/GCST90202764	36635386
GCST90200321	Cholate levels	cholate measurement	7892 European	http://ftp.ebi.ac.uk/pub/databases/gwas/summary_statistics/GCST90200001-GCST90201000/GCST90200321	36635386
GCST90201733	Cholate levels	cholate measurement	53 African unspecified	http://ftp.ebi.ac.uk/pub/databases/gwas/summary_statistics/GCST90201001-GCST90202000/GCST90201733	36635386
GCST90200830	Cholate to adenosine 3',5'-cyclic monophosphate (cAMP) ratio	metabolite ratio	6359 European	http://ftp.ebi.ac.uk/pub/databases/gwas/summary_statistics/GCST90200001-GCST90201000/GCST90200830	36635386
GCST90200833	Cholate to adenosine 5'-monophosphate (AMP) ratio	metabolite ratio	7769 European	http://ftp.ebi.ac.uk/pub/databases/gwas/summary_statistics/GCST90200001-GCST90201000/GCST90200833	36635386
GCST90200828	Cholate to bilirubin (Z,Z) ratio	metabolite ratio	7747 European	http://ftp.ebi.ac.uk/pub/databases/gwas/summary_statistics/GCST90200001-GCST90201000/GCST90200828	36635386
GCST90200831	Cholate to phosphate ratio	metabolite ratio	7742 European	http://ftp.ebi.ac.uk/pub/databases/gwas/summary_statistics/GCST90200001-GCST90201000/GCST90200831	36635386
GCST90200724	Cholate to taurocholate ratio	metabolite ratio	7328 European	http://ftp.ebi.ac.uk/pub/databases/gwas/summary_statistics/GCST90200001-GCST90201000/GCST90200724	36635386
GCST90201775	Cholesterol levels	total cholesterol measurement	60 African unspecified	http://ftp.ebi.ac.uk/pub/databases/gwas/summary_statistics/GCST90201001-GCST90202000/GCST90201775	36635386
GCST90202803	Cholesterol levels	total cholesterol measurement	104 East Asian	http://ftp.ebi.ac.uk/pub/databases/gwas/summary_statistics/GCST90202001-GCST90203000/GCST90202803	36635386
GCST90203802	Cholesterol levels	total cholesterol measurement	108 South Asian	http://ftp.ebi.ac.uk/pub/databases/gwas/summary_statistics/GCST90203001-GCST90204000/GCST90203802	36635386
GCST90200368	Cholesterol levels	total cholesterol measurement	8258 European	http://ftp.ebi.ac.uk/pub/databases/gwas/summary_statistics/GCST90200001-GCST90201000/GCST90200368	36635386
GCST90200984	Cholesterol to benzoate ratio	metabolite ratio	7387 European	http://ftp.ebi.ac.uk/pub/databases/gwas/summary_statistics/GCST90200001-GCST90201000/GCST90200984	36635386
GCST90200887	Cholesterol to cortisol ratio	metabolite ratio	8211 European	http://ftp.ebi.ac.uk/pub/databases/gwas/summary_statistics/GCST90200001-GCST90201000/GCST90200887	36635386
GCST90200983	Cholesterol to linoleoyl-arachidonoyl-glycerol (18:2 to 20:4) [1] ratio	metabolite ratio	7624 European	http://ftp.ebi.ac.uk/pub/databases/gwas/summary_statistics/GCST90200001-GCST90201000/GCST90200983	36635386
GCST90200986	Cholesterol to linoleoyl-arachidonoyl-glycerol (18:2 to 20:4) [2] ratio	metabolite ratio	7655 European	http://ftp.ebi.ac.uk/pub/databases/gwas/summary_statistics/GCST90200001-GCST90201000/GCST90200986	36635386
GCST90200985	Cholesterol to oleoyl-linoleoyl-glycerol (18:1 to 18:2) [2] ratio	metabolite ratio	7981 European	http://ftp.ebi.ac.uk/pub/databases/gwas/summary_statistics/GCST90200001-GCST90201000/GCST90200985	36635386
GCST90200889	Cholesterol to taurocholate ratio	metabolite ratio	7611 European	http://ftp.ebi.ac.uk/pub/databases/gwas/summary_statistics/GCST90200001-GCST90201000/GCST90200889	36635386
GCST90200219	Cholic acid glucuronide levels	cholic acid glucuronide measurement	4414 European	http://ftp.ebi.ac.uk/pub/databases/gwas/summary_statistics/GCST90200001-GCST90201000/GCST90200219	36635386
GCST90202760	Choline levels	choline measurement	104 East Asian	http://ftp.ebi.ac.uk/pub/databases/gwas/summary_statistics/GCST90202001-GCST90203000/GCST90202760	36635386
GCST90200327	Choline levels	choline measurement	8262 European	http://ftp.ebi.ac.uk/pub/databases/gwas/summary_statistics/GCST90200001-GCST90201000/GCST90200327	36635386
GCST90203757	Choline levels	choline measurement	107 South Asian	http://ftp.ebi.ac.uk/pub/databases/gwas/summary_statistics/GCST90203001-GCST90204000/GCST90203757	36635386
GCST90201715	Choline levels	choline measurement	59 African unspecified	http://ftp.ebi.ac.uk/pub/databases/gwas/summary_statistics/GCST90201001-GCST90202000/GCST90201715	36635386
GCST90201776	Choline phosphate levels	choline phosphate measurement	59 African unspecified	http://ftp.ebi.ac.uk/pub/databases/gwas/summary_statistics/GCST90201001-GCST90202000/GCST90201776	36635386
GCST90202802	Choline phosphate levels	choline phosphate measurement	104 East Asian	http://ftp.ebi.ac.uk/pub/databases/gwas/summary_statistics/GCST90202001-GCST90203000/GCST90202802	36635386
GCST90203797	Choline phosphate levels	choline phosphate measurement	108 South Asian	http://ftp.ebi.ac.uk/pub/databases/gwas/summary_statistics/GCST90203001-GCST90204000/GCST90203797	36635386
GCST90200363	Choline phosphate levels	choline phosphate measurement	8245 European	http://ftp.ebi.ac.uk/pub/databases/gwas/summary_statistics/GCST90200001-GCST90201000/GCST90200363	36635386
GCST90200959	Choline phosphate to choline ratio	metabolite ratio	8196 European	http://ftp.ebi.ac.uk/pub/databases/gwas/summary_statistics/GCST90200001-GCST90201000/GCST90200959	36635386
GCST90200960	Choline phosphate to phosphoethanolamine ratio	metabolite ratio	8213 European	http://ftp.ebi.ac.uk/pub/databases/gwas/summary_statistics/GCST90200001-GCST90201000/GCST90200960	36635386
GCST90200811	Choline to taurocholate ratio	metabolite ratio	7625 European	http://ftp.ebi.ac.uk/pub/databases/gwas/summary_statistics/GCST90200001-GCST90201000/GCST90200811	36635386
GCST90201280	Cinnamoylglycine levels	cinnamoylglycine measurement	58 African unspecified	http://ftp.ebi.ac.uk/pub/databases/gwas/summary_statistics/GCST90201001-GCST90202000/GCST90201280	36635386
GCST90202313	Cinnamoylglycine levels	cinnamoylglycine measurement	79 East Asian	http://ftp.ebi.ac.uk/pub/databases/gwas/summary_statistics/GCST90202001-GCST90203000/GCST90202313	36635386
GCST90199888	Cinnamoylglycine levels	cinnamoylglycine measurement	7824 European	http://ftp.ebi.ac.uk/pub/databases/gwas/summary_statistics/GCST90199001-GCST90200000/GCST90199888	36635386
GCST90203327	Cinnamoylglycine levels	cinnamoylglycine measurement	90 South Asian	http://ftp.ebi.ac.uk/pub/databases/gwas/summary_statistics/GCST90203001-GCST90204000/GCST90203327	36635386
GCST90202697	Cis 3,4-methyleneheptanoate levels	3,4-methyleneheptanoate measurement	104 East Asian	http://ftp.ebi.ac.uk/pub/databases/gwas/summary_statistics/GCST90202001-GCST90203000/GCST90202697	36635386
GCST90201652	Cis 3,4-methyleneheptanoate levels	3,4-methyleneheptanoate measurement	60 African unspecified	http://ftp.ebi.ac.uk/pub/databases/gwas/summary_statistics/GCST90201001-GCST90202000/GCST90201652	36635386
GCST90200248	Cis 3,4-methyleneheptanoate levels	3,4-methyleneheptanoate measurement	8223 European	http://ftp.ebi.ac.uk/pub/databases/gwas/summary_statistics/GCST90200001-GCST90201000/GCST90200248	36635386
GCST90203691	Cis 3,4-methyleneheptanoate levels	3,4-methyleneheptanoate measurement	107 South Asian	http://ftp.ebi.ac.uk/pub/databases/gwas/summary_statistics/GCST90203001-GCST90204000/GCST90203691	36635386
GCST90202694	Cis-3,4-methyleneheptanoylcarnitine levels	metabolite measurement	104 East Asian	http://ftp.ebi.ac.uk/pub/databases/gwas/summary_statistics/GCST90202001-GCST90203000/GCST90202694	36635386
GCST90201650	Cis-3,4-methyleneheptanoylcarnitine levels	metabolite measurement	60 African unspecified	http://ftp.ebi.ac.uk/pub/databases/gwas/summary_statistics/GCST90201001-GCST90202000/GCST90201650	36635386
GCST90200266	Cis-3,4-methyleneheptanoylcarnitine levels	metabolite measurement	8259 European	http://ftp.ebi.ac.uk/pub/databases/gwas/summary_statistics/GCST90200001-GCST90201000/GCST90200266	36635386
GCST90203693	Cis-3,4-methyleneheptanoylcarnitine levels	metabolite measurement	107 South Asian	http://ftp.ebi.ac.uk/pub/databases/gwas/summary_statistics/GCST90203001-GCST90204000/GCST90203693	36635386
GCST90202700	Cis-3,4-methyleneheptanoylglycine levels	metabolite measurement	102 East Asian	http://ftp.ebi.ac.uk/pub/databases/gwas/summary_statistics/GCST90202001-GCST90203000/GCST90202700	36635386
GCST90201670	Cis-3,4-methyleneheptanoylglycine levels	metabolite measurement	58 African unspecified	http://ftp.ebi.ac.uk/pub/databases/gwas/summary_statistics/GCST90201001-GCST90202000/GCST90201670	36635386
GCST90200274	Cis-3,4-methyleneheptanoylglycine levels	metabolite measurement	8106 European	http://ftp.ebi.ac.uk/pub/databases/gwas/summary_statistics/GCST90200001-GCST90201000/GCST90200274	36635386
GCST90203701	Cis-3,4-methyleneheptanoylglycine levels	metabolite measurement	108 South Asian	http://ftp.ebi.ac.uk/pub/databases/gwas/summary_statistics/GCST90203001-GCST90204000/GCST90203701	36635386
GCST90201317	Cis-4-decenoate (10:1n6) levels	cis-4-decenoate (10:1n6) measurement	59 African unspecified	http://ftp.ebi.ac.uk/pub/databases/gwas/summary_statistics/GCST90201001-GCST90202000/GCST90201317	36635386
GCST90202328	Cis-4-decenoate (10:1n6) levels	cis-4-decenoate (10:1n6) measurement	103 East Asian	http://ftp.ebi.ac.uk/pub/databases/gwas/summary_statistics/GCST90202001-GCST90203000/GCST90202328	36635386
GCST90199893	Cis-4-decenoate (10:1n6) levels	cis-4-decenoate (10:1n6) measurement	8173 European	http://ftp.ebi.ac.uk/pub/databases/gwas/summary_statistics/GCST90199001-GCST90200000/GCST90199893	36635386
GCST90203372	Cis-4-decenoate (10:1n6) levels	cis-4-decenoate (10:1n6) measurement	108 South Asian	http://ftp.ebi.ac.uk/pub/databases/gwas/summary_statistics/GCST90203001-GCST90204000/GCST90203372	36635386
GCST90201290	Cis-4-decenoylcarnitine (C10:1) levels	cis-4-decenoylcarnitine (C10:1) measurement	60 African unspecified	http://ftp.ebi.ac.uk/pub/databases/gwas/summary_statistics/GCST90201001-GCST90202000/GCST90201290	36635386
GCST90202315	Cis-4-decenoylcarnitine (C10:1) levels	cis-4-decenoylcarnitine (C10:1) measurement	104 East Asian	http://ftp.ebi.ac.uk/pub/databases/gwas/summary_statistics/GCST90202001-GCST90203000/GCST90202315	36635386
GCST90199880	Cis-4-decenoylcarnitine (C10:1) levels	cis-4-decenoylcarnitine (C10:1) measurement	8239 European	http://ftp.ebi.ac.uk/pub/databases/gwas/summary_statistics/GCST90199001-GCST90200000/GCST90199880	36635386
GCST90203334	Cis-4-decenoylcarnitine (C10:1) levels	cis-4-decenoylcarnitine (C10:1) measurement	107 South Asian	http://ftp.ebi.ac.uk/pub/databases/gwas/summary_statistics/GCST90203001-GCST90204000/GCST90203334	36635386
GCST90200005	Citraconate/glutaconate levels	blood glutaconic acid measurement,blood Citraconic acid measurement	8263 European	http://ftp.ebi.ac.uk/pub/databases/gwas/summary_statistics/GCST90200001-GCST90201000/GCST90200005	36635386
GCST90201429	Citraconate/glutaconate levels	blood glutaconic acid measurement,blood Citraconic acid measurement	60 African unspecified	http://ftp.ebi.ac.uk/pub/databases/gwas/summary_statistics/GCST90201001-GCST90202000/GCST90201429	36635386
GCST90203467	Citraconate/glutaconate levels	blood glutaconic acid measurement,blood Citraconic acid measurement	108 South Asian	http://ftp.ebi.ac.uk/pub/databases/gwas/summary_statistics/GCST90203001-GCST90204000/GCST90203467	36635386
GCST90202464	Citraconate/glutaconate levels	blood glutaconic acid measurement,blood Citraconic acid measurement	100 East Asian	http://ftp.ebi.ac.uk/pub/databases/gwas/summary_statistics/GCST90202001-GCST90203000/GCST90202464	36635386
GCST90201084	Citramalate levels	blood citramalate measurement	50 African unspecified	http://ftp.ebi.ac.uk/pub/databases/gwas/summary_statistics/GCST90201001-GCST90202000/GCST90201084	36635386
GCST90199692	Citramalate levels	blood citramalate measurement	7125 European	http://ftp.ebi.ac.uk/pub/databases/gwas/summary_statistics/GCST90199001-GCST90200000/GCST90199692	36635386
GCST90203149	Citramalate levels	blood citramalate measurement	83 South Asian	http://ftp.ebi.ac.uk/pub/databases/gwas/summary_statistics/GCST90203001-GCST90204000/GCST90203149	36635386
GCST90202116	Citramalate levels	blood citramalate measurement	84 East Asian	http://ftp.ebi.ac.uk/pub/databases/gwas/summary_statistics/GCST90202001-GCST90203000/GCST90202116	36635386
GCST90202746	Citrate levels	citrate measurement	104 East Asian	http://ftp.ebi.ac.uk/pub/databases/gwas/summary_statistics/GCST90202001-GCST90203000/GCST90202746	36635386
GCST90203737	Citrate levels	citrate measurement	107 South Asian	http://ftp.ebi.ac.uk/pub/databases/gwas/summary_statistics/GCST90203001-GCST90204000/GCST90203737	36635386
GCST90201689	Citrate levels	citrate measurement	60 African unspecified	http://ftp.ebi.ac.uk/pub/databases/gwas/summary_statistics/GCST90201001-GCST90202000/GCST90201689	36635386
GCST90200304	Citrate levels	citrate measurement	8260 European	http://ftp.ebi.ac.uk/pub/databases/gwas/summary_statistics/GCST90200001-GCST90201000/GCST90200304	36635386
GCST90200888	Citrate to 4-hydroxyphenylpyruvate ratio	metabolite ratio	7851 European	http://ftp.ebi.ac.uk/pub/databases/gwas/summary_statistics/GCST90200001-GCST90201000/GCST90200888	36635386
GCST90200842	Citrate to oxalate (ethanedioate) ratio	metabolite ratio	8097 European	http://ftp.ebi.ac.uk/pub/databases/gwas/summary_statistics/GCST90200001-GCST90201000/GCST90200842	36635386
GCST90200996	Citrate to taurocholate ratio	metabolite ratio	7618 European	http://ftp.ebi.ac.uk/pub/databases/gwas/summary_statistics/GCST90200001-GCST90201000/GCST90200996	36635386
GCST90201804	Citrulline levels	citrulline measurement	59 African unspecified	http://ftp.ebi.ac.uk/pub/databases/gwas/summary_statistics/GCST90201001-GCST90202000/GCST90201804	36635386
GCST90203812	Citrulline levels	citrulline measurement	106 South Asian	http://ftp.ebi.ac.uk/pub/databases/gwas/summary_statistics/GCST90203001-GCST90204000/GCST90203812	36635386
GCST90200403	Citrulline levels	citrulline measurement	8157 European	http://ftp.ebi.ac.uk/pub/databases/gwas/summary_statistics/GCST90200001-GCST90201000/GCST90200403	36635386
GCST90202830	Citrulline levels	citrulline measurement	104 East Asian	http://ftp.ebi.ac.uk/pub/databases/gwas/summary_statistics/GCST90202001-GCST90203000/GCST90202830	36635386
GCST90200761	Citrulline to dimethylarginine (SDMA + ADMA) ratio	metabolite ratio	8243 European	http://ftp.ebi.ac.uk/pub/databases/gwas/summary_statistics/GCST90200001-GCST90201000/GCST90200761	36635386
GCST90200899	Citrulline to ornithine ratio	metabolite ratio	8225 European	http://ftp.ebi.ac.uk/pub/databases/gwas/summary_statistics/GCST90200001-GCST90201000/GCST90200899	36635386
GCST90200898	Citrulline to phosphate ratio	metabolite ratio	8294 European	http://ftp.ebi.ac.uk/pub/databases/gwas/summary_statistics/GCST90200001-GCST90201000/GCST90200898	36635386
GCST90201806	Cortisol levels	cortisol measurement	59 African unspecified	http://ftp.ebi.ac.uk/pub/databases/gwas/summary_statistics/GCST90201001-GCST90202000/GCST90201806	36635386
GCST90203817	Cortisol levels	cortisol measurement	108 South Asian	http://ftp.ebi.ac.uk/pub/databases/gwas/summary_statistics/GCST90203001-GCST90204000/GCST90203817	36635386
GCST90200378	Cortisol levels	cortisol measurement	8193 European	http://ftp.ebi.ac.uk/pub/databases/gwas/summary_statistics/GCST90200001-GCST90201000/GCST90200378	36635386
GCST90202814	Cortisol levels	cortisol measurement	104 East Asian	http://ftp.ebi.ac.uk/pub/databases/gwas/summary_statistics/GCST90202001-GCST90203000/GCST90202814	36635386
GCST90200873	Cortisol to 4-cholesten-3-one ratio	metabolite ratio	7027 European	http://ftp.ebi.ac.uk/pub/databases/gwas/summary_statistics/GCST90200001-GCST90201000/GCST90200873	36635386
GCST90200890	Cortisol to taurocholate ratio	metabolite ratio	7610 European	http://ftp.ebi.ac.uk/pub/databases/gwas/summary_statistics/GCST90200001-GCST90201000/GCST90200890	36635386
GCST90201780	Cortisone levels	cortisone measurement	60 African unspecified	http://ftp.ebi.ac.uk/pub/databases/gwas/summary_statistics/GCST90201001-GCST90202000/GCST90201780	36635386
GCST90202810	Cortisone levels	cortisone measurement	102 East Asian	http://ftp.ebi.ac.uk/pub/databases/gwas/summary_statistics/GCST90202001-GCST90203000/GCST90202810	36635386
GCST90203792	Cortisone levels	cortisone measurement	107 South Asian	http://ftp.ebi.ac.uk/pub/databases/gwas/summary_statistics/GCST90203001-GCST90204000/GCST90203792	36635386
GCST90200360	Cortisone levels	cortisone measurement	8153 European	http://ftp.ebi.ac.uk/pub/databases/gwas/summary_statistics/GCST90200001-GCST90201000/GCST90200360	36635386
GCST90200876	Cortisone to 4-cholesten-3-one ratio	metabolite ratio	6971 European	http://ftp.ebi.ac.uk/pub/databases/gwas/summary_statistics/GCST90200001-GCST90201000/GCST90200876	36635386
GCST90200751	Cortisone to cortisol ratio	metabolite ratio	8173 European	http://ftp.ebi.ac.uk/pub/databases/gwas/summary_statistics/GCST90200001-GCST90201000/GCST90200751	36635386
GCST90201554	Cortolone glucuronide (1) levels	cortolone glucuronide (1) measurement	58 African unspecified	http://ftp.ebi.ac.uk/pub/databases/gwas/summary_statistics/GCST90201001-GCST90202000/GCST90201554	36635386
GCST90203580	Cortolone glucuronide (1) levels	cortolone glucuronide (1) measurement	106 South Asian	http://ftp.ebi.ac.uk/pub/databases/gwas/summary_statistics/GCST90203001-GCST90204000/GCST90203580	36635386
GCST90202599	Cortolone glucuronide (1) levels	cortolone glucuronide (1) measurement	102 East Asian	http://ftp.ebi.ac.uk/pub/databases/gwas/summary_statistics/GCST90202001-GCST90203000/GCST90202599	36635386
GCST90200156	Cortolone glucuronide (1) levels	cortolone glucuronide (1) measurement	8152 European	http://ftp.ebi.ac.uk/pub/databases/gwas/summary_statistics/GCST90200001-GCST90201000/GCST90200156	36635386
GCST90202756	Creatine levels	creatine measurement	104 East Asian	http://ftp.ebi.ac.uk/pub/databases/gwas/summary_statistics/GCST90202001-GCST90203000/GCST90202756	36635386
GCST90200323	Creatine levels	creatine measurement	8285 European	http://ftp.ebi.ac.uk/pub/databases/gwas/summary_statistics/GCST90200001-GCST90201000/GCST90200323	36635386
GCST90203751	Creatine levels	creatine measurement	107 South Asian	http://ftp.ebi.ac.uk/pub/databases/gwas/summary_statistics/GCST90203001-GCST90204000/GCST90203751	36635386
GCST90201721	Creatine levels	creatine measurement	60 African unspecified	http://ftp.ebi.ac.uk/pub/databases/gwas/summary_statistics/GCST90201001-GCST90202000/GCST90201721	36635386
GCST90200791	Creatine to carnitine ratio	metabolite ratio	8235 European	http://ftp.ebi.ac.uk/pub/databases/gwas/summary_statistics/GCST90200001-GCST90201000/GCST90200791	36635386
GCST90201777	Creatinine levels	serum creatinine amount	60 African unspecified	http://ftp.ebi.ac.uk/pub/databases/gwas/summary_statistics/GCST90201001-GCST90202000/GCST90201777	36635386
GCST90202808	Creatinine levels	serum creatinine amount	104 East Asian	http://ftp.ebi.ac.uk/pub/databases/gwas/summary_statistics/GCST90202001-GCST90203000/GCST90202808	36635386
GCST90200366	Creatinine levels	serum creatinine amount	8239 European	http://ftp.ebi.ac.uk/pub/databases/gwas/summary_statistics/GCST90200001-GCST90201000/GCST90200366	36635386
GCST90202757	Cys-gly, oxidized levels	cys-gly, oxidized measurement	104 East Asian	http://ftp.ebi.ac.uk/pub/databases/gwas/summary_statistics/GCST90202001-GCST90203000/GCST90202757	36635386
GCST90200319	Cys-gly, oxidized levels	cys-gly, oxidized measurement	8256 European	http://ftp.ebi.ac.uk/pub/databases/gwas/summary_statistics/GCST90200001-GCST90201000/GCST90200319	36635386
GCST90203752	Cys-gly, oxidized levels	cys-gly, oxidized measurement	108 South Asian	http://ftp.ebi.ac.uk/pub/databases/gwas/summary_statistics/GCST90203001-GCST90204000/GCST90203752	36635386
GCST90201720	Cys-gly, oxidized levels	cys-gly, oxidized measurement	59 African unspecified	http://ftp.ebi.ac.uk/pub/databases/gwas/summary_statistics/GCST90201001-GCST90202000/GCST90201720	36635386
GCST90201769	Cystathionine levels	cystathionine measurement	57 African unspecified	http://ftp.ebi.ac.uk/pub/databases/gwas/summary_statistics/GCST90201001-GCST90202000/GCST90201769	36635386
GCST90203804	Cystathionine levels	cystathionine measurement	104 South Asian	http://ftp.ebi.ac.uk/pub/databases/gwas/summary_statistics/GCST90203001-GCST90204000/GCST90203804	36635386
GCST90200383	Cystathionine levels	cystathionine measurement	8014 European	http://ftp.ebi.ac.uk/pub/databases/gwas/summary_statistics/GCST90200001-GCST90201000/GCST90200383	36635386
GCST90202817	Cystathionine levels	cystathionine measurement	100 East Asian	http://ftp.ebi.ac.uk/pub/databases/gwas/summary_statistics/GCST90202001-GCST90203000/GCST90202817	36635386
GCST90200439	Cysteine levels	cysteine measurement	8216 European	http://ftp.ebi.ac.uk/pub/databases/gwas/summary_statistics/GCST90200001-GCST90201000/GCST90200439	36635386
GCST90201840	Cysteine levels	cysteine measurement	60 African unspecified	http://ftp.ebi.ac.uk/pub/databases/gwas/summary_statistics/GCST90201001-GCST90202000/GCST90201840	36635386
GCST90203854	Cysteine levels	cysteine measurement	107 South Asian	http://ftp.ebi.ac.uk/pub/databases/gwas/summary_statistics/GCST90203001-GCST90204000/GCST90203854	36635386
GCST90202877	Cysteine levels	cysteine measurement	102 East Asian	http://ftp.ebi.ac.uk/pub/databases/gwas/summary_statistics/GCST90202001-GCST90203000/GCST90202877	36635386
GCST90201066	Cysteine s-sulfate levels	cysteine s-sulfate measurement	59 African unspecified	http://ftp.ebi.ac.uk/pub/databases/gwas/summary_statistics/GCST90201001-GCST90202000/GCST90201066	36635386
GCST90199671	Cysteine s-sulfate levels	cysteine s-sulfate measurement	8229 European	http://ftp.ebi.ac.uk/pub/databases/gwas/summary_statistics/GCST90199001-GCST90200000/GCST90199671	36635386
GCST90203138	Cysteine s-sulfate levels	cysteine s-sulfate measurement	106 South Asian	http://ftp.ebi.ac.uk/pub/databases/gwas/summary_statistics/GCST90203001-GCST90204000/GCST90203138	36635386
GCST90202104	Cysteine s-sulfate levels	cysteine s-sulfate measurement	103 East Asian	http://ftp.ebi.ac.uk/pub/databases/gwas/summary_statistics/GCST90202001-GCST90203000/GCST90202104	36635386
GCST90200785	Cysteine to 5-oxoproline ratio	metabolite ratio	8203 European	http://ftp.ebi.ac.uk/pub/databases/gwas/summary_statistics/GCST90200001-GCST90201000/GCST90200785	36635386
GCST90200786	Cysteine to alanine ratio	metabolite ratio	8220 European	http://ftp.ebi.ac.uk/pub/databases/gwas/summary_statistics/GCST90200001-GCST90201000/GCST90200786	36635386
GCST90203247	Cysteine-glutathione disulfide levels	cysteine-glutathione disulfide measurement	100 South Asian	http://ftp.ebi.ac.uk/pub/databases/gwas/summary_statistics/GCST90203001-GCST90204000/GCST90203247	36635386
GCST90202207	Cysteine-glutathione disulfide levels	cysteine-glutathione disulfide measurement	97 East Asian	http://ftp.ebi.ac.uk/pub/databases/gwas/summary_statistics/GCST90202001-GCST90203000/GCST90202207	36635386
GCST90199784	Cysteine-glutathione disulfide levels	cysteine-glutathione disulfide measurement	7812 European	http://ftp.ebi.ac.uk/pub/databases/gwas/summary_statistics/GCST90199001-GCST90200000/GCST90199784	36635386
GCST90201180	Cysteine-glutathione disulfide levels	cysteine-glutathione disulfide measurement	53 African unspecified	http://ftp.ebi.ac.uk/pub/databases/gwas/summary_statistics/GCST90201001-GCST90202000/GCST90201180	36635386
GCST90201295	Cysteinylglycine disulfide levels	cysteinylglycine disulfide measurement	58 African unspecified	http://ftp.ebi.ac.uk/pub/databases/gwas/summary_statistics/GCST90201001-GCST90202000/GCST90201295	36635386
GCST90202336	Cysteinylglycine disulfide levels	cysteinylglycine disulfide measurement	101 East Asian	http://ftp.ebi.ac.uk/pub/databases/gwas/summary_statistics/GCST90202001-GCST90203000/GCST90202336	36635386
GCST90199883	Cysteinylglycine disulfide levels	cysteinylglycine disulfide measurement	8216 European	http://ftp.ebi.ac.uk/pub/databases/gwas/summary_statistics/GCST90199001-GCST90200000/GCST90199883	36635386
GCST90203352	Cysteinylglycine disulfide levels	cysteinylglycine disulfide measurement	107 South Asian	http://ftp.ebi.ac.uk/pub/databases/gwas/summary_statistics/GCST90203001-GCST90204000/GCST90203352	36635386
GCST90201782	Cysteinylglycine levels	cysteinylglycine measurement	60 African unspecified	http://ftp.ebi.ac.uk/pub/databases/gwas/summary_statistics/GCST90201001-GCST90202000/GCST90201782	36635386
GCST90203806	Cysteinylglycine levels	cysteinylglycine measurement	108 South Asian	http://ftp.ebi.ac.uk/pub/databases/gwas/summary_statistics/GCST90203001-GCST90204000/GCST90203806	36635386
GCST90200364	Cysteinylglycine levels	cysteinylglycine measurement	8214 European	http://ftp.ebi.ac.uk/pub/databases/gwas/summary_statistics/GCST90200001-GCST90201000/GCST90200364	36635386
GCST90202812	Cysteinylglycine levels	cysteinylglycine measurement	103 East Asian	http://ftp.ebi.ac.uk/pub/databases/gwas/summary_statistics/GCST90202001-GCST90203000/GCST90202812	36635386
GCST90200875	Cysteinylglycine to glutamate ratio	metabolite ratio	8197 European	http://ftp.ebi.ac.uk/pub/databases/gwas/summary_statistics/GCST90200001-GCST90201000/GCST90200875	36635386
GCST90200874	Cysteinylglycine to taurine ratio	metabolite ratio	8193 European	http://ftp.ebi.ac.uk/pub/databases/gwas/summary_statistics/GCST90200001-GCST90201000/GCST90200874	36635386
GCST90201767	Cystine levels	cystine measurement	60 African unspecified	http://ftp.ebi.ac.uk/pub/databases/gwas/summary_statistics/GCST90201001-GCST90202000/GCST90201767	36635386
GCST90203811	Cystine levels	cystine measurement	107 South Asian	http://ftp.ebi.ac.uk/pub/databases/gwas/summary_statistics/GCST90203001-GCST90204000/GCST90203811	36635386
GCST90200382	Cystine levels	cystine measurement	8177 European	http://ftp.ebi.ac.uk/pub/databases/gwas/summary_statistics/GCST90200001-GCST90201000/GCST90200382	36635386
GCST90202813	Cystine levels	cystine measurement	100 East Asian	http://ftp.ebi.ac.uk/pub/databases/gwas/summary_statistics/GCST90202001-GCST90203000/GCST90202813	36635386
GCST90200429	Cytidine levels	cytidine measurement	7659 European	http://ftp.ebi.ac.uk/pub/databases/gwas/summary_statistics/GCST90200001-GCST90201000/GCST90200429	36635386
GCST90201829	Cytidine levels	cytidine measurement	52 African unspecified	http://ftp.ebi.ac.uk/pub/databases/gwas/summary_statistics/GCST90201001-GCST90202000/GCST90201829	36635386
GCST90203858	Cytidine levels	cytidine measurement	97 South Asian	http://ftp.ebi.ac.uk/pub/databases/gwas/summary_statistics/GCST90203001-GCST90204000/GCST90203858	36635386
GCST90202872	Cytidine levels	cytidine measurement	80 East Asian	http://ftp.ebi.ac.uk/pub/databases/gwas/summary_statistics/GCST90202001-GCST90203000/GCST90202872	36635386
GCST90200956	Cytidine to N-acetylglucosamine to N-acetylgalactosamine ratio	metabolite ratio	7427 European	http://ftp.ebi.ac.uk/pub/databases/gwas/summary_statistics/GCST90200001-GCST90201000/GCST90200956	36635386
GCST90200954	Cytidine to N-acetylneuraminate ratio	metabolite ratio	7683 European	http://ftp.ebi.ac.uk/pub/databases/gwas/summary_statistics/GCST90200001-GCST90201000/GCST90200954	36635386
GCST90200433	Cytosine levels	blood cytosine measurement	6990 European	http://ftp.ebi.ac.uk/pub/databases/gwas/summary_statistics/GCST90200001-GCST90201000/GCST90200433	36635386
GCST90201832	Cytosine levels	blood cytosine measurement	45 African unspecified	http://ftp.ebi.ac.uk/pub/databases/gwas/summary_statistics/GCST90201001-GCST90202000/GCST90201832	36635386
GCST90203865	Cytosine levels	blood cytosine measurement	83 South Asian	http://ftp.ebi.ac.uk/pub/databases/gwas/summary_statistics/GCST90203001-GCST90204000/GCST90203865	36635386
GCST90202884	Cytosine levels	blood cytosine measurement	88 East Asian	http://ftp.ebi.ac.uk/pub/databases/gwas/summary_statistics/GCST90202001-GCST90203000/GCST90202884	36635386
GCST90200700	Decadienedioic acid (C10:2-DC) levels	decadienedioic acid (C10:2-DC) measurement	8131 European	http://ftp.ebi.ac.uk/pub/databases/gwas/summary_statistics/GCST90200001-GCST90201000/GCST90200700	36635386
GCST90202707	Decadienedioic acid (C10:2-DC) levels	decadienedioic acid (C10:2-DC) measurement	102 East Asian	http://ftp.ebi.ac.uk/pub/databases/gwas/summary_statistics/GCST90202001-GCST90203000/GCST90202707	36635386
GCST90201660	Decadienedioic acid (C10:2-DC) levels	decadienedioic acid (C10:2-DC) measurement	58 African unspecified	http://ftp.ebi.ac.uk/pub/databases/gwas/summary_statistics/GCST90201001-GCST90202000/GCST90201660	36635386
GCST90203696	Decadienedioic acid (C10:2-DC) levels	decadienedioic acid (C10:2-DC) measurement	104 South Asian	http://ftp.ebi.ac.uk/pub/databases/gwas/summary_statistics/GCST90203001-GCST90204000/GCST90203696	36635386
GCST90202157	Decanoylcarnitine (C10) levels	decanoylcarnitine measurement	104 East Asian	http://ftp.ebi.ac.uk/pub/databases/gwas/summary_statistics/GCST90202001-GCST90203000/GCST90202157	36635386
GCST90199722	Decanoylcarnitine (C10) levels	decanoylcarnitine measurement	8225 European	http://ftp.ebi.ac.uk/pub/databases/gwas/summary_statistics/GCST90199001-GCST90200000/GCST90199722	36635386
GCST90203183	Decanoylcarnitine (C10) levels	decanoylcarnitine measurement	108 South Asian	http://ftp.ebi.ac.uk/pub/databases/gwas/summary_statistics/GCST90203001-GCST90204000/GCST90203183	36635386
GCST90201130	Decanoylcarnitine (C10) levels	decanoylcarnitine measurement	60 African unspecified	http://ftp.ebi.ac.uk/pub/databases/gwas/summary_statistics/GCST90201001-GCST90202000/GCST90201130	36635386
GCST90201598	Delta-CEHC levels	delta-CEHC measurement	48 African unspecified	http://ftp.ebi.ac.uk/pub/databases/gwas/summary_statistics/GCST90201001-GCST90202000/GCST90201598	36635386
GCST90202629	Delta-CEHC levels	delta-CEHC measurement	87 East Asian	http://ftp.ebi.ac.uk/pub/databases/gwas/summary_statistics/GCST90202001-GCST90203000/GCST90202629	36635386
GCST90200202	Delta-CEHC levels	delta-CEHC measurement	6233 European	http://ftp.ebi.ac.uk/pub/databases/gwas/summary_statistics/GCST90200001-GCST90201000/GCST90200202	36635386
GCST90203630	Delta-CEHC levels	delta-CEHC measurement	71 South Asian	http://ftp.ebi.ac.uk/pub/databases/gwas/summary_statistics/GCST90203001-GCST90204000/GCST90203630	36635386
GCST90203282	Deoxycarnitine levels	deoxycarnitine measurement	107 South Asian	http://ftp.ebi.ac.uk/pub/databases/gwas/summary_statistics/GCST90203001-GCST90204000/GCST90203282	36635386
GCST90202252	Deoxycarnitine levels	deoxycarnitine measurement	104 East Asian	http://ftp.ebi.ac.uk/pub/databases/gwas/summary_statistics/GCST90202001-GCST90203000/GCST90202252	36635386
GCST90199813	Deoxycarnitine levels	deoxycarnitine measurement	8271 European	http://ftp.ebi.ac.uk/pub/databases/gwas/summary_statistics/GCST90199001-GCST90200000/GCST90199813	36635386
GCST90201217	Deoxycarnitine levels	deoxycarnitine measurement	58 African unspecified	http://ftp.ebi.ac.uk/pub/databases/gwas/summary_statistics/GCST90201001-GCST90202000/GCST90201217	36635386
GCST90201771	Deoxycholate levels	deoxycholate measurement	56 African unspecified	http://ftp.ebi.ac.uk/pub/databases/gwas/summary_statistics/GCST90201001-GCST90202000/GCST90201771	36635386
GCST90203801	Deoxycholate levels	deoxycholate measurement	84 South Asian	http://ftp.ebi.ac.uk/pub/databases/gwas/summary_statistics/GCST90203001-GCST90204000/GCST90203801	36635386
GCST90200386	Deoxycholate levels	deoxycholate measurement	7649 European	http://ftp.ebi.ac.uk/pub/databases/gwas/summary_statistics/GCST90200001-GCST90201000/GCST90200386	36635386
GCST90202811	Deoxycholate levels	deoxycholate measurement	89 East Asian	http://ftp.ebi.ac.uk/pub/databases/gwas/summary_statistics/GCST90202001-GCST90203000/GCST90202811	36635386
GCST90202702	Deoxycholic acid 12-sulfate levels	deoxycholic acid (12 or 24)-sulfate measurement	90 East Asian	http://ftp.ebi.ac.uk/pub/databases/gwas/summary_statistics/GCST90202001-GCST90203000/GCST90202702	36635386
GCST90201667	Deoxycholic acid 12-sulfate levels	deoxycholic acid (12 or 24)-sulfate measurement	52 African unspecified	http://ftp.ebi.ac.uk/pub/databases/gwas/summary_statistics/GCST90201001-GCST90202000/GCST90201667	36635386
GCST90200250	Deoxycholic acid 12-sulfate levels	deoxycholic acid (12 or 24)-sulfate measurement	7438 European	http://ftp.ebi.ac.uk/pub/databases/gwas/summary_statistics/GCST90200001-GCST90201000/GCST90200250	36635386
GCST90203697	Deoxycholic acid 12-sulfate levels	deoxycholic acid (12 or 24)-sulfate measurement	81 South Asian	http://ftp.ebi.ac.uk/pub/databases/gwas/summary_statistics/GCST90203001-GCST90204000/GCST90203697	36635386
GCST90200699	Deoxycholic acid glucuronide levels	deoxycholic acid glucuronide measurement	8060 European	http://ftp.ebi.ac.uk/pub/databases/gwas/summary_statistics/GCST90200001-GCST90201000/GCST90200699	36635386
GCST90201623	Deoxycholic acid glucuronide levels	deoxycholic acid glucuronide measurement	57 African unspecified	http://ftp.ebi.ac.uk/pub/databases/gwas/summary_statistics/GCST90201001-GCST90202000/GCST90201623	36635386
GCST90202656	Deoxycholic acid glucuronide levels	deoxycholic acid glucuronide measurement	87 East Asian	http://ftp.ebi.ac.uk/pub/databases/gwas/summary_statistics/GCST90202001-GCST90203000/GCST90202656	36635386
GCST90203653	Deoxycholic acid glucuronide levels	deoxycholic acid glucuronide measurement	105 South Asian	http://ftp.ebi.ac.uk/pub/databases/gwas/summary_statistics/GCST90203001-GCST90204000/GCST90203653	36635386
GCST90201070	DHEAS levels	dehydroepiandrosterone sulphate measurement	60 African unspecified	http://ftp.ebi.ac.uk/pub/databases/gwas/summary_statistics/GCST90201001-GCST90202000/GCST90201070	36635386
GCST90199673	DHEAS levels	dehydroepiandrosterone sulphate measurement	8228 European	http://ftp.ebi.ac.uk/pub/databases/gwas/summary_statistics/GCST90199001-GCST90200000/GCST90199673	36635386
GCST90202689	Dibutyl sulfosuccinate levels	blood dibutyl sulfosuccinate measurement	104 East Asian	http://ftp.ebi.ac.uk/pub/databases/gwas/summary_statistics/GCST90202001-GCST90203000/GCST90202689	36635386
GCST90201663	Dibutyl sulfosuccinate levels	blood dibutyl sulfosuccinate measurement	58 African unspecified	http://ftp.ebi.ac.uk/pub/databases/gwas/summary_statistics/GCST90201001-GCST90202000/GCST90201663	36635386
GCST90200256	Dibutyl sulfosuccinate levels	blood dibutyl sulfosuccinate measurement	8099 European	http://ftp.ebi.ac.uk/pub/databases/gwas/summary_statistics/GCST90200001-GCST90201000/GCST90200256	36635386
GCST90203690	Dibutyl sulfosuccinate levels	blood dibutyl sulfosuccinate measurement	107 South Asian	http://ftp.ebi.ac.uk/pub/databases/gwas/summary_statistics/GCST90203001-GCST90204000/GCST90203690	36635386
GCST90202758	Dihomo-linoleate (20:2n6) levels	dihomo-linoleate 20:2n6 measurement	104 East Asian	http://ftp.ebi.ac.uk/pub/databases/gwas/summary_statistics/GCST90202001-GCST90203000/GCST90202758	36635386
GCST90200320	Dihomo-linoleate (20:2n6) levels	dihomo-linoleate 20:2n6 measurement	8284 European	http://ftp.ebi.ac.uk/pub/databases/gwas/summary_statistics/GCST90200001-GCST90201000/GCST90200320	36635386
GCST90203750	Dihomo-linoleate (20:2n6) levels	dihomo-linoleate 20:2n6 measurement	108 South Asian	http://ftp.ebi.ac.uk/pub/databases/gwas/summary_statistics/GCST90203001-GCST90204000/GCST90203750	36635386
GCST90201709	Dihomo-linoleate (20:2n6) levels	dihomo-linoleate 20:2n6 measurement	60 African unspecified	http://ftp.ebi.ac.uk/pub/databases/gwas/summary_statistics/GCST90201001-GCST90202000/GCST90201709	36635386
GCST90203288	Dihomo-linolenate (20:3n3 or n6) levels	dihomo-linolenate 20:3n3 or n6 measurement	108 South Asian	http://ftp.ebi.ac.uk/pub/databases/gwas/summary_statistics/GCST90203001-GCST90204000/GCST90203288	36635386
GCST90202263	Dihomo-linolenate (20:3n3 or n6) levels	dihomo-linolenate 20:3n3 or n6 measurement	104 East Asian	http://ftp.ebi.ac.uk/pub/databases/gwas/summary_statistics/GCST90202001-GCST90203000/GCST90202263	36635386
GCST90199820	Dihomo-linolenate (20:3n3 or n6) levels	dihomo-linolenate 20:3n3 or n6 measurement	8273 European	http://ftp.ebi.ac.uk/pub/databases/gwas/summary_statistics/GCST90199001-GCST90200000/GCST90199820	36635386
GCST90201227	Dihomo-linolenate (20:3n3 or n6) levels	dihomo-linolenate 20:3n3 or n6 measurement	60 African unspecified	http://ftp.ebi.ac.uk/pub/databases/gwas/summary_statistics/GCST90201001-GCST90202000/GCST90201227	36635386
GCST90203586	Dihomo-linolenoylcarnitine (C20:3n3 or 6) levels	dihomo-linolenoylcarnitine (C20:3n3 or 6) measurement	104 South Asian	http://ftp.ebi.ac.uk/pub/databases/gwas/summary_statistics/GCST90203001-GCST90204000/GCST90203586	36635386
GCST90202581	Dihomo-linolenoylcarnitine (C20:3n3 or 6) levels	dihomo-linolenoylcarnitine (C20:3n3 or 6) measurement	102 East Asian	http://ftp.ebi.ac.uk/pub/databases/gwas/summary_statistics/GCST90202001-GCST90203000/GCST90202581	36635386
GCST90200139	Dihomo-linolenoylcarnitine (C20:3n3 or 6) levels	dihomo-linolenoylcarnitine (C20:3n3 or 6) measurement	8092 European	http://ftp.ebi.ac.uk/pub/databases/gwas/summary_statistics/GCST90200001-GCST90201000/GCST90200139	36635386
GCST90200090	Dihomo-linolenoyl-choline levels	dihomo-linolenoyl-choline measurement	6954 European	http://ftp.ebi.ac.uk/pub/databases/gwas/summary_statistics/GCST90200001-GCST90201000/GCST90200090	36635386
GCST90201502	Dihomo-linolenoyl-choline levels	dihomo-linolenoyl-choline measurement	51 African unspecified	http://ftp.ebi.ac.uk/pub/databases/gwas/summary_statistics/GCST90201001-GCST90202000/GCST90201502	36635386
GCST90203532	Dihomo-linolenoyl-choline levels	dihomo-linolenoyl-choline measurement	79 South Asian	http://ftp.ebi.ac.uk/pub/databases/gwas/summary_statistics/GCST90203001-GCST90204000/GCST90203532	36635386
GCST90202537	Dihomo-linolenoyl-choline levels	dihomo-linolenoyl-choline measurement	84 East Asian	http://ftp.ebi.ac.uk/pub/databases/gwas/summary_statistics/GCST90202001-GCST90203000/GCST90202537	36635386
GCST90203589	Dihomo-linoleoylcarnitine (C20:2) levels	dihomo-linoleoylcarnitine (C20:2) measurement	103 South Asian	http://ftp.ebi.ac.uk/pub/databases/gwas/summary_statistics/GCST90203001-GCST90204000/GCST90203589	36635386
GCST90200144	Dihomo-linoleoylcarnitine (C20:2) levels	dihomo-linoleoylcarnitine (C20:2) measurement	7887 European	http://ftp.ebi.ac.uk/pub/databases/gwas/summary_statistics/GCST90200001-GCST90201000/GCST90200144	36635386
GCST90201616	Dihydrocaffeate sulfate (2) levels	dihydrocaffeate sulfate (2) measurement	44 African unspecified	http://ftp.ebi.ac.uk/pub/databases/gwas/summary_statistics/GCST90201001-GCST90202000/GCST90201616	36635386
GCST90202665	Dihydrocaffeate sulfate (2) levels	dihydrocaffeate sulfate (2) measurement	83 East Asian	http://ftp.ebi.ac.uk/pub/databases/gwas/summary_statistics/GCST90202001-GCST90203000/GCST90202665	36635386
GCST90200222	Dihydrocaffeate sulfate (2) levels	dihydrocaffeate sulfate (2) measurement	6519 European	http://ftp.ebi.ac.uk/pub/databases/gwas/summary_statistics/GCST90200001-GCST90201000/GCST90200222	36635386
GCST90203660	Dihydrocaffeate sulfate (2) levels	dihydrocaffeate sulfate (2) measurement	81 South Asian	http://ftp.ebi.ac.uk/pub/databases/gwas/summary_statistics/GCST90203001-GCST90204000/GCST90203660	36635386
GCST90201323	Dihydroferulate levels	dihydroferulate measurement	44 African unspecified	http://ftp.ebi.ac.uk/pub/databases/gwas/summary_statistics/GCST90201001-GCST90202000/GCST90201323	36635386
GCST90202349	Dihydroferulate levels	dihydroferulate measurement	86 East Asian	http://ftp.ebi.ac.uk/pub/databases/gwas/summary_statistics/GCST90202001-GCST90203000/GCST90202349	36635386
GCST90199921	Dihydroferulate levels	dihydroferulate measurement	6398 European	http://ftp.ebi.ac.uk/pub/databases/gwas/summary_statistics/GCST90199001-GCST90200000/GCST90199921	36635386
GCST90203362	Dihydroferulate levels	dihydroferulate measurement	75 South Asian	http://ftp.ebi.ac.uk/pub/databases/gwas/summary_statistics/GCST90203001-GCST90204000/GCST90203362	36635386
GCST90201578	Dihydroferulic acid sulfate levels	dihydroferulic acid sulfate measurement	33 African unspecified	http://ftp.ebi.ac.uk/pub/databases/gwas/summary_statistics/GCST90201001-GCST90202000/GCST90201578	36635386
GCST90202609	Dihydroferulic acid sulfate levels	dihydroferulic acid sulfate measurement	68 East Asian	http://ftp.ebi.ac.uk/pub/databases/gwas/summary_statistics/GCST90202001-GCST90203000/GCST90202609	36635386
GCST90200166	Dihydroferulic acid sulfate levels	dihydroferulic acid sulfate measurement	5188 European	http://ftp.ebi.ac.uk/pub/databases/gwas/summary_statistics/GCST90200001-GCST90201000/GCST90200166	36635386
GCST90203617	Dihydroferulic acid sulfate levels	dihydroferulic acid sulfate measurement	72 South Asian	http://ftp.ebi.ac.uk/pub/databases/gwas/summary_statistics/GCST90203001-GCST90204000/GCST90203617	36635386
GCST90200444	Dihydroorotate levels	dihydroorotate measurement	8195 European	http://ftp.ebi.ac.uk/pub/databases/gwas/summary_statistics/GCST90200001-GCST90201000/GCST90200444	36635386
GCST90201865	Dihydroorotate levels	dihydroorotate measurement	58 African unspecified	http://ftp.ebi.ac.uk/pub/databases/gwas/summary_statistics/GCST90201001-GCST90202000/GCST90201865	36635386
GCST90203871	Dihydroorotate levels	dihydroorotate measurement	107 South Asian	http://ftp.ebi.ac.uk/pub/databases/gwas/summary_statistics/GCST90203001-GCST90204000/GCST90203871	36635386
GCST90199942	Dimethyl sulfone levels	dimethyl sulfone measurement	7905 European	http://ftp.ebi.ac.uk/pub/databases/gwas/summary_statistics/GCST90199001-GCST90200000/GCST90199942	36635386
GCST90203383	Dimethyl sulfone levels	dimethyl sulfone measurement	105 South Asian	http://ftp.ebi.ac.uk/pub/databases/gwas/summary_statistics/GCST90203001-GCST90204000/GCST90203383	36635386
GCST90202385	Dimethyl sulfone levels	dimethyl sulfone measurement	95 East Asian	http://ftp.ebi.ac.uk/pub/databases/gwas/summary_statistics/GCST90202001-GCST90203000/GCST90202385	36635386
GCST90201354	Dimethyl sulfone levels	dimethyl sulfone measurement	56 African unspecified	http://ftp.ebi.ac.uk/pub/databases/gwas/summary_statistics/GCST90201001-GCST90202000/GCST90201354	36635386
GCST90203291	Dimethylarginine (sdma + adma) levels	dimethylarginine (SDMA + ADMA) measurement	108 South Asian	http://ftp.ebi.ac.uk/pub/databases/gwas/summary_statistics/GCST90203001-GCST90204000/GCST90203291	36635386
GCST90202276	Dimethylarginine (sdma + adma) levels	dimethylarginine (SDMA + ADMA) measurement	103 East Asian	http://ftp.ebi.ac.uk/pub/databases/gwas/summary_statistics/GCST90202001-GCST90203000/GCST90202276	36635386
GCST90199832	Dimethylarginine (sdma + adma) levels	dimethylarginine (SDMA + ADMA) measurement	8233 European	http://ftp.ebi.ac.uk/pub/databases/gwas/summary_statistics/GCST90199001-GCST90200000/GCST90199832	36635386
GCST90201230	Dimethylarginine (sdma + adma) levels	dimethylarginine (SDMA + ADMA) measurement	60 African unspecified	http://ftp.ebi.ac.uk/pub/databases/gwas/summary_statistics/GCST90201001-GCST90202000/GCST90201230	36635386
GCST90201839	Dimethylglycine levels	dimethylglycine measurement	59 African unspecified	http://ftp.ebi.ac.uk/pub/databases/gwas/summary_statistics/GCST90201001-GCST90202000/GCST90201839	36635386
GCST90200424	Dimethylglycine levels	dimethylglycine measurement	8224 European	http://ftp.ebi.ac.uk/pub/databases/gwas/summary_statistics/GCST90200001-GCST90201000/GCST90200424	36635386
GCST90202879	Dimethylglycine levels	dimethylglycine measurement	104 East Asian	http://ftp.ebi.ac.uk/pub/databases/gwas/summary_statistics/GCST90202001-GCST90203000/GCST90202879	36635386
GCST90201112	Docosadienoate (22:2n6) levels	docosadienoate (22:2n6) measurement	60 African unspecified	http://ftp.ebi.ac.uk/pub/databases/gwas/summary_statistics/GCST90201001-GCST90202000/GCST90201112	36635386
GCST90202146	Docosadienoate (22:2n6) levels	docosadienoate (22:2n6) measurement	104 East Asian	http://ftp.ebi.ac.uk/pub/databases/gwas/summary_statistics/GCST90202001-GCST90203000/GCST90202146	36635386
GCST90199711	Docosadienoate (22:2n6) levels	docosadienoate (22:2n6) measurement	8264 European	http://ftp.ebi.ac.uk/pub/databases/gwas/summary_statistics/GCST90199001-GCST90200000/GCST90199711	36635386
GCST90203186	Docosadienoate (22:2n6) levels	docosadienoate (22:2n6) measurement	107 South Asian	http://ftp.ebi.ac.uk/pub/databases/gwas/summary_statistics/GCST90203001-GCST90204000/GCST90203186	36635386
GCST90201307	Docosadioate (C22-DC) levels	docosadioate (C22-DC) measurement	60 African unspecified	http://ftp.ebi.ac.uk/pub/databases/gwas/summary_statistics/GCST90201001-GCST90202000/GCST90201307	36635386
GCST90202357	Docosadioate (C22-DC) levels	docosadioate (C22-DC) measurement	103 East Asian	http://ftp.ebi.ac.uk/pub/databases/gwas/summary_statistics/GCST90202001-GCST90203000/GCST90202357	36635386
GCST90199913	Docosadioate (C22-DC) levels	docosadioate (C22-DC) measurement	8225 European	http://ftp.ebi.ac.uk/pub/databases/gwas/summary_statistics/GCST90199001-GCST90200000/GCST90199913	36635386
GCST90201053	Docosahexaenoate DHA; 22:6n3 levels	docosahexaenoate DHA; 22:6n3 measurement	59 African unspecified	http://ftp.ebi.ac.uk/pub/databases/gwas/summary_statistics/GCST90201001-GCST90202000/GCST90201053	36635386
GCST90199651	Docosahexaenoate DHA; 22:6n3 levels	docosahexaenoate DHA; 22:6n3 measurement	8279 European	http://ftp.ebi.ac.uk/pub/databases/gwas/summary_statistics/GCST90199001-GCST90200000/GCST90199651	36635386
GCST90203126	Docosahexaenoate DHA; 22:6n3 levels	docosahexaenoate DHA; 22:6n3 measurement	108 South Asian	http://ftp.ebi.ac.uk/pub/databases/gwas/summary_statistics/GCST90203001-GCST90204000/GCST90203126	36635386
GCST90202090	Docosahexaenoate DHA; 22:6n3 levels	docosahexaenoate DHA; 22:6n3 measurement	104 East Asian	http://ftp.ebi.ac.uk/pub/databases/gwas/summary_statistics/GCST90202001-GCST90203000/GCST90202090	36635386
GCST90203575	Docosahexaenoylcarnitine (C22:6) levels	docosahexaenoylcarnitine (C22:6) measurement	81 South Asian	http://ftp.ebi.ac.uk/pub/databases/gwas/summary_statistics/GCST90203001-GCST90204000/GCST90203575	36635386
GCST90202588	Docosahexaenoylcarnitine (C22:6) levels	docosahexaenoylcarnitine (C22:6) measurement	92 East Asian	http://ftp.ebi.ac.uk/pub/databases/gwas/summary_statistics/GCST90202001-GCST90203000/GCST90202588	36635386
GCST90200146	Docosahexaenoylcarnitine (C22:6) levels	docosahexaenoylcarnitine (C22:6) measurement	6287 European	http://ftp.ebi.ac.uk/pub/databases/gwas/summary_statistics/GCST90200001-GCST90201000/GCST90200146	36635386
GCST90200091	Docosahexaenoylcholine levels	docosahexaenoylcholine measurement	7440 European	http://ftp.ebi.ac.uk/pub/databases/gwas/summary_statistics/GCST90200001-GCST90201000/GCST90200091	36635386
GCST90201504	Docosahexaenoylcholine levels	docosahexaenoylcholine measurement	55 African unspecified	http://ftp.ebi.ac.uk/pub/databases/gwas/summary_statistics/GCST90201001-GCST90202000/GCST90201504	36635386
GCST90203533	Docosahexaenoylcholine levels	docosahexaenoylcholine measurement	92 South Asian	http://ftp.ebi.ac.uk/pub/databases/gwas/summary_statistics/GCST90203001-GCST90204000/GCST90203533	36635386
GCST90202536	Docosahexaenoylcholine levels	docosahexaenoylcholine measurement	101 East Asian	http://ftp.ebi.ac.uk/pub/databases/gwas/summary_statistics/GCST90202001-GCST90203000/GCST90202536	36635386
GCST90203261	Docosapentaenoate (n6 DPA; 22:5n6) levels	docosapentaenoate (n6 DPA; 22:5n6) measurement	91 South Asian	http://ftp.ebi.ac.uk/pub/databases/gwas/summary_statistics/GCST90203001-GCST90204000/GCST90203261	36635386
GCST90202227	Docosapentaenoate (n6 DPA; 22:5n6) levels	docosapentaenoate (n6 DPA; 22:5n6) measurement	95 East Asian	http://ftp.ebi.ac.uk/pub/databases/gwas/summary_statistics/GCST90202001-GCST90203000/GCST90202227	36635386
GCST90199796	Docosapentaenoate (n6 DPA; 22:5n6) levels	docosapentaenoate (n6 DPA; 22:5n6) measurement	7540 European	http://ftp.ebi.ac.uk/pub/databases/gwas/summary_statistics/GCST90199001-GCST90200000/GCST90199796	36635386
GCST90201201	Docosapentaenoate (n6 DPA; 22:5n6) levels	docosapentaenoate (n6 DPA; 22:5n6) measurement	57 African unspecified	http://ftp.ebi.ac.uk/pub/databases/gwas/summary_statistics/GCST90201001-GCST90202000/GCST90201201	36635386
GCST90201107	Docosapentaenoate n3 DPA; 22:5n3 levels	docosapentaenoate n3 DPA; 22:5n3 measurement	60 African unspecified	http://ftp.ebi.ac.uk/pub/databases/gwas/summary_statistics/GCST90201001-GCST90202000/GCST90201107	36635386
GCST90202144	Docosapentaenoate n3 DPA; 22:5n3 levels	docosapentaenoate n3 DPA; 22:5n3 measurement	104 East Asian	http://ftp.ebi.ac.uk/pub/databases/gwas/summary_statistics/GCST90202001-GCST90203000/GCST90202144	36635386
GCST90199713	Docosapentaenoate n3 DPA; 22:5n3 levels	docosapentaenoate n3 DPA; 22:5n3 measurement	8284 European	http://ftp.ebi.ac.uk/pub/databases/gwas/summary_statistics/GCST90199001-GCST90200000/GCST90199713	36635386
GCST90203179	Docosapentaenoate n3 DPA; 22:5n3 levels	docosapentaenoate n3 DPA; 22:5n3 measurement	108 South Asian	http://ftp.ebi.ac.uk/pub/databases/gwas/summary_statistics/GCST90203001-GCST90204000/GCST90203179	36635386
GCST90201115	Docosatrienoate (22:3n3) levels	blood 13,16,19-Docosatrienoic acid amount	51 African unspecified	http://ftp.ebi.ac.uk/pub/databases/gwas/summary_statistics/GCST90201001-GCST90202000/GCST90201115	36635386
GCST90202148	Docosatrienoate (22:3n3) levels	blood 13,16,19-Docosatrienoic acid amount	89 East Asian	http://ftp.ebi.ac.uk/pub/databases/gwas/summary_statistics/GCST90202001-GCST90203000/GCST90202148	36635386
GCST90199710	Docosatrienoate (22:3n3) levels	blood 13,16,19-Docosatrienoic acid amount	6511 European	http://ftp.ebi.ac.uk/pub/databases/gwas/summary_statistics/GCST90199001-GCST90200000/GCST90199710	36635386
GCST90203176	Docosatrienoate (22:3n3) levels	blood 13,16,19-Docosatrienoic acid amount	88 South Asian	http://ftp.ebi.ac.uk/pub/databases/gwas/summary_statistics/GCST90203001-GCST90204000/GCST90203176	36635386
GCST90201531	Docosatrienoate (22:3n6) levels	metabolite measurement	32 African unspecified	http://ftp.ebi.ac.uk/pub/databases/gwas/summary_statistics/GCST90201001-GCST90202000/GCST90201531	36635386
GCST90203553	Docosatrienoate (22:3n6) levels	metabolite measurement	56 South Asian	http://ftp.ebi.ac.uk/pub/databases/gwas/summary_statistics/GCST90203001-GCST90204000/GCST90203553	36635386
GCST90200138	Docosatrienoate (22:3n6) levels	metabolite measurement	5398 European	http://ftp.ebi.ac.uk/pub/databases/gwas/summary_statistics/GCST90200001-GCST90201000/GCST90200138	36635386
GCST90201601	Dodecadienoate (12:2) levels	dodecadienoate (12:2) measurement	60 African unspecified	http://ftp.ebi.ac.uk/pub/databases/gwas/summary_statistics/GCST90201001-GCST90202000/GCST90201601	36635386
GCST90202645	Dodecadienoate (12:2) levels	dodecadienoate (12:2) measurement	104 East Asian	http://ftp.ebi.ac.uk/pub/databases/gwas/summary_statistics/GCST90202001-GCST90203000/GCST90202645	36635386
GCST90200190	Dodecadienoate (12:2) levels	dodecadienoate (12:2) measurement	8244 European	http://ftp.ebi.ac.uk/pub/databases/gwas/summary_statistics/GCST90200001-GCST90201000/GCST90200190	36635386
GCST90203636	Dodecadienoate (12:2) levels	dodecadienoate (12:2) measurement	108 South Asian	http://ftp.ebi.ac.uk/pub/databases/gwas/summary_statistics/GCST90203001-GCST90204000/GCST90203636	36635386
GCST90202130	Dodecanedioate (C12-DC) levels	dodecanedioate measurement	102 East Asian	http://ftp.ebi.ac.uk/pub/databases/gwas/summary_statistics/GCST90202001-GCST90203000/GCST90202130	36635386
GCST90201098	Dodecanedioate (C12-DC) levels	dodecanedioate measurement	58 African unspecified	http://ftp.ebi.ac.uk/pub/databases/gwas/summary_statistics/GCST90201001-GCST90202000/GCST90201098	36635386
GCST90199697	Dodecanedioate (C12-DC) levels	dodecanedioate measurement	8240 European	http://ftp.ebi.ac.uk/pub/databases/gwas/summary_statistics/GCST90199001-GCST90200000/GCST90199697	36635386
GCST90203159	Dodecanedioate (C12-DC) levels	dodecanedioate measurement	106 South Asian	http://ftp.ebi.ac.uk/pub/databases/gwas/summary_statistics/GCST90203001-GCST90204000/GCST90203159	36635386
GCST90201566	Dodecenedioate (C12:1-DC) levels	dodecenedioate (C12:1-DC) measurement	59 African unspecified	http://ftp.ebi.ac.uk/pub/databases/gwas/summary_statistics/GCST90201001-GCST90202000/GCST90201566	36635386
GCST90203597	Dodecenedioate (C12:1-DC) levels	dodecenedioate (C12:1-DC) measurement	106 South Asian	http://ftp.ebi.ac.uk/pub/databases/gwas/summary_statistics/GCST90203001-GCST90204000/GCST90203597	36635386
GCST90202601	Dodecenedioate (C12:1-DC) levels	dodecenedioate (C12:1-DC) measurement	103 East Asian	http://ftp.ebi.ac.uk/pub/databases/gwas/summary_statistics/GCST90202001-GCST90203000/GCST90202601	36635386
GCST90200159	Dodecenedioate (C12:1-DC) levels	dodecenedioate (C12:1-DC) measurement	8217 European	http://ftp.ebi.ac.uk/pub/databases/gwas/summary_statistics/GCST90200001-GCST90201000/GCST90200159	36635386
GCST90200019	Dopamine 3-o-sulfate levels	dopamine 3-O-sulfate measurement	8252 European	http://ftp.ebi.ac.uk/pub/databases/gwas/summary_statistics/GCST90200001-GCST90201000/GCST90200019	36635386
GCST90201417	Dopamine 3-o-sulfate levels	dopamine 3-O-sulfate measurement	59 African unspecified	http://ftp.ebi.ac.uk/pub/databases/gwas/summary_statistics/GCST90201001-GCST90202000/GCST90201417	36635386
GCST90203463	Dopamine 3-o-sulfate levels	dopamine 3-O-sulfate measurement	108 South Asian	http://ftp.ebi.ac.uk/pub/databases/gwas/summary_statistics/GCST90203001-GCST90204000/GCST90203463	36635386
GCST90202456	Dopamine 3-o-sulfate levels	dopamine 3-O-sulfate measurement	103 East Asian	http://ftp.ebi.ac.uk/pub/databases/gwas/summary_statistics/GCST90202001-GCST90203000/GCST90202456	36635386
GCST90200016	Dopamine 4-sulfate levels	dopamine 4-sulfate measurement	6888 European	http://ftp.ebi.ac.uk/pub/databases/gwas/summary_statistics/GCST90200001-GCST90201000/GCST90200016	36635386
GCST90201400	Dopamine 4-sulfate levels	dopamine 4-sulfate measurement	52 African unspecified	http://ftp.ebi.ac.uk/pub/databases/gwas/summary_statistics/GCST90201001-GCST90202000/GCST90201400	36635386
GCST90203453	Dopamine 4-sulfate levels	dopamine 4-sulfate measurement	87 South Asian	http://ftp.ebi.ac.uk/pub/databases/gwas/summary_statistics/GCST90203001-GCST90204000/GCST90203453	36635386
GCST90202451	Dopamine 4-sulfate levels	dopamine 4-sulfate measurement	76 East Asian	http://ftp.ebi.ac.uk/pub/databases/gwas/summary_statistics/GCST90202001-GCST90203000/GCST90202451	36635386
GCST90200798	Dopamine 4-sulfate to dopamine 3-O-sulfate ratio	metabolite ratio	6840 European	http://ftp.ebi.ac.uk/pub/databases/gwas/summary_statistics/GCST90200001-GCST90201000/GCST90200798	36635386
GCST90201085	EDTA levels	EDTA measurement	60 African unspecified	http://ftp.ebi.ac.uk/pub/databases/gwas/summary_statistics/GCST90201001-GCST90202000/GCST90201085	36635386
GCST90199690	EDTA levels	EDTA measurement	8239 European	http://ftp.ebi.ac.uk/pub/databases/gwas/summary_statistics/GCST90199001-GCST90200000/GCST90199690	36635386
GCST90203150	EDTA levels	EDTA measurement	107 South Asian	http://ftp.ebi.ac.uk/pub/databases/gwas/summary_statistics/GCST90203001-GCST90204000/GCST90203150	36635386
GCST90202122	EDTA levels	EDTA measurement	104 East Asian	http://ftp.ebi.ac.uk/pub/databases/gwas/summary_statistics/GCST90202001-GCST90203000/GCST90202122	36635386
GCST90201309	Eicosanedioate (C20-DC) levels	eicosanedioate (C20-DC) measurement	60 African unspecified	http://ftp.ebi.ac.uk/pub/databases/gwas/summary_statistics/GCST90201001-GCST90202000/GCST90201309	36635386
GCST90202353	Eicosanedioate (C20-DC) levels	eicosanedioate (C20-DC) measurement	104 East Asian	http://ftp.ebi.ac.uk/pub/databases/gwas/summary_statistics/GCST90202001-GCST90203000/GCST90202353	36635386
GCST90199909	Eicosanedioate (C20-DC) levels	eicosanedioate (C20-DC) measurement	8258 European	http://ftp.ebi.ac.uk/pub/databases/gwas/summary_statistics/GCST90199001-GCST90200000/GCST90199909	36635386
GCST90203369	Eicosanedioate (C20-DC) levels	eicosanedioate (C20-DC) measurement	107 South Asian	http://ftp.ebi.ac.uk/pub/databases/gwas/summary_statistics/GCST90203001-GCST90204000/GCST90203369	36635386
GCST90202789	Eicosapentaenoate (EPA; 20:5n3) levels	eicosapentaenoate (EPA; 20:5n3) measurement	104 East Asian	http://ftp.ebi.ac.uk/pub/databases/gwas/summary_statistics/GCST90202001-GCST90203000/GCST90202789	36635386
GCST90203780	Eicosapentaenoate (EPA; 20:5n3) levels	eicosapentaenoate (EPA; 20:5n3) measurement	107 South Asian	http://ftp.ebi.ac.uk/pub/databases/gwas/summary_statistics/GCST90203001-GCST90204000/GCST90203780	36635386
GCST90200349	Eicosapentaenoate (EPA; 20:5n3) levels	eicosapentaenoate (EPA; 20:5n3) measurement	8257 European	http://ftp.ebi.ac.uk/pub/databases/gwas/summary_statistics/GCST90200001-GCST90201000/GCST90200349	36635386
GCST90201752	Eicosapentaenoate (EPA; 20:5n3) levels	eicosapentaenoate (EPA; 20:5n3) measurement	59 African unspecified	http://ftp.ebi.ac.uk/pub/databases/gwas/summary_statistics/GCST90201001-GCST90202000/GCST90201752	36635386
GCST90201631	Eicosenedioate (C20:1-DC) levels	metabolite measurement	56 African unspecified	http://ftp.ebi.ac.uk/pub/databases/gwas/summary_statistics/GCST90201001-GCST90202000/GCST90201631	36635386
GCST90202672	Eicosenedioate (C20:1-DC) levels	metabolite measurement	100 East Asian	http://ftp.ebi.ac.uk/pub/databases/gwas/summary_statistics/GCST90202001-GCST90203000/GCST90202672	36635386
GCST90200245	Eicosenedioate (C20:1-DC) levels	metabolite measurement	7861 European	http://ftp.ebi.ac.uk/pub/databases/gwas/summary_statistics/GCST90200001-GCST90201000/GCST90200245	36635386
GCST90203670	Eicosenedioate (C20:1-DC) levels	metabolite measurement	104 South Asian	http://ftp.ebi.ac.uk/pub/databases/gwas/summary_statistics/GCST90203001-GCST90204000/GCST90203670	36635386
GCST90202175	Eicosenoate (20:1) levels	eicosenoate (20:1) measurement	104 East Asian	http://ftp.ebi.ac.uk/pub/databases/gwas/summary_statistics/GCST90202001-GCST90203000/GCST90202175	36635386
GCST90199744	Eicosenoate (20:1) levels	eicosenoate (20:1) measurement	8277 European	http://ftp.ebi.ac.uk/pub/databases/gwas/summary_statistics/GCST90199001-GCST90200000/GCST90199744	36635386
GCST90203204	Eicosenoate (20:1) levels	eicosenoate (20:1) measurement	108 South Asian	http://ftp.ebi.ac.uk/pub/databases/gwas/summary_statistics/GCST90203001-GCST90204000/GCST90203204	36635386
GCST90201144	Eicosenoate (20:1) levels	eicosenoate (20:1) measurement	60 African unspecified	http://ftp.ebi.ac.uk/pub/databases/gwas/summary_statistics/GCST90201001-GCST90202000/GCST90201144	36635386
GCST90201548	Eicosenoylcarnitine (C20:1) levels	eicosenoylcarnitine (C20:1) measurement	59 African unspecified	http://ftp.ebi.ac.uk/pub/databases/gwas/summary_statistics/GCST90201001-GCST90202000/GCST90201548	36635386
GCST90203590	Eicosenoylcarnitine (C20:1) levels	eicosenoylcarnitine (C20:1) measurement	106 South Asian	http://ftp.ebi.ac.uk/pub/databases/gwas/summary_statistics/GCST90203001-GCST90204000/GCST90203590	36635386
GCST90202579	Eicosenoylcarnitine (C20:1) levels	eicosenoylcarnitine (C20:1) measurement	103 East Asian	http://ftp.ebi.ac.uk/pub/databases/gwas/summary_statistics/GCST90202001-GCST90203000/GCST90202579	36635386
GCST90200148	Eicosenoylcarnitine (C20:1) levels	eicosenoylcarnitine (C20:1) measurement	8145 European	http://ftp.ebi.ac.uk/pub/databases/gwas/summary_statistics/GCST90200001-GCST90201000/GCST90200148	36635386
GCST90202169	Epiandrosterone sulfate levels	epiandrosterone sulfate measurement	103 East Asian	http://ftp.ebi.ac.uk/pub/databases/gwas/summary_statistics/GCST90202001-GCST90203000/GCST90202169	36635386
GCST90199752	Epiandrosterone sulfate levels	epiandrosterone sulfate measurement	8174 European	http://ftp.ebi.ac.uk/pub/databases/gwas/summary_statistics/GCST90199001-GCST90200000/GCST90199752	36635386
GCST90203200	Epiandrosterone sulfate levels	epiandrosterone sulfate measurement	106 South Asian	http://ftp.ebi.ac.uk/pub/databases/gwas/summary_statistics/GCST90203001-GCST90204000/GCST90203200	36635386
GCST90201122	Epiandrosterone sulfate levels	epiandrosterone sulfate measurement	60 African unspecified	http://ftp.ebi.ac.uk/pub/databases/gwas/summary_statistics/GCST90201001-GCST90202000/GCST90201122	36635386
GCST90201282	Ergothioneine levels	ergothioneine measurement	60 African unspecified	http://ftp.ebi.ac.uk/pub/databases/gwas/summary_statistics/GCST90201001-GCST90202000/GCST90201282	36635386
GCST90202308	Ergothioneine levels	ergothioneine measurement	104 East Asian	http://ftp.ebi.ac.uk/pub/databases/gwas/summary_statistics/GCST90202001-GCST90203000/GCST90202308	36635386
GCST90199879	Ergothioneine levels	ergothioneine measurement	8210 European	http://ftp.ebi.ac.uk/pub/databases/gwas/summary_statistics/GCST90199001-GCST90200000/GCST90199879	36635386
GCST90203328	Ergothioneine levels	ergothioneine measurement	108 South Asian	http://ftp.ebi.ac.uk/pub/databases/gwas/summary_statistics/GCST90203001-GCST90204000/GCST90203328	36635386
GCST90202729	Erucate (22:1n9) levels	erucate (22:1n9) measurement	103 East Asian	http://ftp.ebi.ac.uk/pub/databases/gwas/summary_statistics/GCST90202001-GCST90203000/GCST90202729	36635386
GCST90203730	Erucate (22:1n9) levels	erucate (22:1n9) measurement	106 South Asian	http://ftp.ebi.ac.uk/pub/databases/gwas/summary_statistics/GCST90203001-GCST90204000/GCST90203730	36635386
GCST90201688	Erucate (22:1n9) levels	erucate (22:1n9) measurement	59 African unspecified	http://ftp.ebi.ac.uk/pub/databases/gwas/summary_statistics/GCST90201001-GCST90202000/GCST90201688	36635386
GCST90200284	Erucate (22:1n9) levels	erucate (22:1n9) measurement	8208 European	http://ftp.ebi.ac.uk/pub/databases/gwas/summary_statistics/GCST90200001-GCST90201000/GCST90200284	36635386
GCST90201074	Erythritol levels	erythritol measurement	59 African unspecified	http://ftp.ebi.ac.uk/pub/databases/gwas/summary_statistics/GCST90201001-GCST90202000/GCST90201074	36635386
GCST90199667	Erythritol levels	erythritol measurement	8167 European	http://ftp.ebi.ac.uk/pub/databases/gwas/summary_statistics/GCST90199001-GCST90200000/GCST90199667	36635386
GCST90203147	Erythritol levels	erythritol measurement	106 South Asian	http://ftp.ebi.ac.uk/pub/databases/gwas/summary_statistics/GCST90203001-GCST90204000/GCST90203147	36635386
GCST90202098	Erythritol levels	erythritol measurement	103 East Asian	http://ftp.ebi.ac.uk/pub/databases/gwas/summary_statistics/GCST90202001-GCST90203000/GCST90202098	36635386
GCST90202187	Erythronate levels	erythronate measurement	103 East Asian	http://ftp.ebi.ac.uk/pub/databases/gwas/summary_statistics/GCST90202001-GCST90203000/GCST90202187	36635386
GCST90199746	Erythronate levels	erythronate measurement	8198 European	http://ftp.ebi.ac.uk/pub/databases/gwas/summary_statistics/GCST90199001-GCST90200000/GCST90199746	36635386
GCST90203203	Erythronate levels	erythronate measurement	107 South Asian	http://ftp.ebi.ac.uk/pub/databases/gwas/summary_statistics/GCST90203001-GCST90204000/GCST90203203	36635386
GCST90201154	Erythronate levels	erythronate measurement	59 African unspecified	http://ftp.ebi.ac.uk/pub/databases/gwas/summary_statistics/GCST90201001-GCST90202000/GCST90201154	36635386
GCST90201551	Ethyl alpha-glucopyranoside levels	ethyl alpha-glucopyranoside measurement	44 African unspecified	http://ftp.ebi.ac.uk/pub/databases/gwas/summary_statistics/GCST90201001-GCST90202000/GCST90201551	36635386
GCST90202585	Ethyl alpha-glucopyranoside levels	ethyl alpha-glucopyranoside measurement	74 East Asian	http://ftp.ebi.ac.uk/pub/databases/gwas/summary_statistics/GCST90202001-GCST90203000/GCST90202585	36635386
GCST90200141	Ethyl alpha-glucopyranoside levels	ethyl alpha-glucopyranoside measurement	6620 European	http://ftp.ebi.ac.uk/pub/databases/gwas/summary_statistics/GCST90200001-GCST90201000/GCST90200141	36635386
GCST90201593	Ethyl beta-glucopyranoside levels	ethyl beta-glucopyranoside measurement	57 African unspecified	http://ftp.ebi.ac.uk/pub/databases/gwas/summary_statistics/GCST90201001-GCST90202000/GCST90201593	36635386
GCST90202644	Ethyl beta-glucopyranoside levels	ethyl beta-glucopyranoside measurement	103 East Asian	http://ftp.ebi.ac.uk/pub/databases/gwas/summary_statistics/GCST90202001-GCST90203000/GCST90202644	36635386
GCST90200193	Ethyl beta-glucopyranoside levels	ethyl beta-glucopyranoside measurement	8152 European	http://ftp.ebi.ac.uk/pub/databases/gwas/summary_statistics/GCST90200001-GCST90201000/GCST90200193	36635386
GCST90203626	Ethyl beta-glucopyranoside levels	ethyl beta-glucopyranoside measurement	107 South Asian	http://ftp.ebi.ac.uk/pub/databases/gwas/summary_statistics/GCST90203001-GCST90204000/GCST90203626	36635386
GCST90200705	Ethylmalonate levels	ethylmalonate measurement	8172 European	http://ftp.ebi.ac.uk/pub/databases/gwas/summary_statistics/GCST90200001-GCST90201000/GCST90200705	36635386
GCST90202797	Ethylmalonate levels	ethylmalonate measurement	103 East Asian	http://ftp.ebi.ac.uk/pub/databases/gwas/summary_statistics/GCST90202001-GCST90203000/GCST90202797	36635386
GCST90203781	Ethylmalonate levels	ethylmalonate measurement	106 South Asian	http://ftp.ebi.ac.uk/pub/databases/gwas/summary_statistics/GCST90203001-GCST90204000/GCST90203781	36635386
GCST90201761	Ethylmalonate levels	ethylmalonate measurement	58 African unspecified	http://ftp.ebi.ac.uk/pub/databases/gwas/summary_statistics/GCST90201001-GCST90202000/GCST90201761	36635386
GCST90199994	Ethylparaben sulfate levels	blood ethylparaben sulfate measurement	6408 European	http://ftp.ebi.ac.uk/pub/databases/gwas/summary_statistics/GCST90199001-GCST90200000/GCST90199994	36635386
GCST90201416	Ethylparaben sulfate levels	blood ethylparaben sulfate measurement	42 African unspecified	http://ftp.ebi.ac.uk/pub/databases/gwas/summary_statistics/GCST90201001-GCST90202000/GCST90201416	36635386
GCST90203434	Ethylparaben sulfate levels	blood ethylparaben sulfate measurement	76 South Asian	http://ftp.ebi.ac.uk/pub/databases/gwas/summary_statistics/GCST90203001-GCST90204000/GCST90203434	36635386
GCST90202442	Ethylparaben sulfate levels	blood ethylparaben sulfate measurement	83 East Asian	http://ftp.ebi.ac.uk/pub/databases/gwas/summary_statistics/GCST90202001-GCST90203000/GCST90202442	36635386
GCST90199964	Etiocholanolone glucuronide levels	etiocholanolone glucuronide measurement	7821 European	http://ftp.ebi.ac.uk/pub/databases/gwas/summary_statistics/GCST90199001-GCST90200000/GCST90199964	36635386
GCST90203430	Etiocholanolone glucuronide levels	etiocholanolone glucuronide measurement	99 South Asian	http://ftp.ebi.ac.uk/pub/databases/gwas/summary_statistics/GCST90203001-GCST90204000/GCST90203430	36635386
GCST90201373	Etiocholanolone glucuronide levels	etiocholanolone glucuronide measurement	58 African unspecified	http://ftp.ebi.ac.uk/pub/databases/gwas/summary_statistics/GCST90201001-GCST90202000/GCST90201373	36635386
GCST90202410	Etiocholanolone glucuronide levels	etiocholanolone glucuronide measurement	99 East Asian	http://ftp.ebi.ac.uk/pub/databases/gwas/summary_statistics/GCST90202001-GCST90203000/GCST90202410	36635386
GCST90199986	Eugenol sulfate levels	eugenol sulfate measurement	7063 European	http://ftp.ebi.ac.uk/pub/databases/gwas/summary_statistics/GCST90199001-GCST90200000/GCST90199986	36635386
GCST90201412	Eugenol sulfate levels	eugenol sulfate measurement	54 African unspecified	http://ftp.ebi.ac.uk/pub/databases/gwas/summary_statistics/GCST90201001-GCST90202000/GCST90201412	36635386
GCST90203437	Eugenol sulfate levels	eugenol sulfate measurement	96 South Asian	http://ftp.ebi.ac.uk/pub/databases/gwas/summary_statistics/GCST90203001-GCST90204000/GCST90203437	36635386
GCST90202433	Eugenol sulfate levels	eugenol sulfate measurement	83 East Asian	http://ftp.ebi.ac.uk/pub/databases/gwas/summary_statistics/GCST90202001-GCST90203000/GCST90202433	36635386
GCST90199955	Ferulic acid 4-sulfate levels	ferulic acid 4-sulfate measurement	7332 European	http://ftp.ebi.ac.uk/pub/databases/gwas/summary_statistics/GCST90199001-GCST90200000/GCST90199955	36635386
GCST90203427	Ferulic acid 4-sulfate levels	ferulic acid 4-sulfate measurement	96 South Asian	http://ftp.ebi.ac.uk/pub/databases/gwas/summary_statistics/GCST90203001-GCST90204000/GCST90203427	36635386
GCST90201366	Ferulic acid 4-sulfate levels	ferulic acid 4-sulfate measurement	56 African unspecified	http://ftp.ebi.ac.uk/pub/databases/gwas/summary_statistics/GCST90201001-GCST90202000/GCST90201366	36635386
GCST90202418	Ferulic acid 4-sulfate levels	ferulic acid 4-sulfate measurement	92 East Asian	http://ftp.ebi.ac.uk/pub/databases/gwas/summary_statistics/GCST90202001-GCST90203000/GCST90202418	36635386
GCST90201783	Flavin adenine dinucleotide (FAD) levels	flavin adenine dinucleotide (FAD) measurement	48 African unspecified	http://ftp.ebi.ac.uk/pub/databases/gwas/summary_statistics/GCST90201001-GCST90202000/GCST90201783	36635386
GCST90202807	Flavin adenine dinucleotide (FAD) levels	flavin adenine dinucleotide (FAD) measurement	76 East Asian	http://ftp.ebi.ac.uk/pub/databases/gwas/summary_statistics/GCST90202001-GCST90203000/GCST90202807	36635386
GCST90203809	Flavin adenine dinucleotide (FAD) levels	flavin adenine dinucleotide (FAD) measurement	80 South Asian	http://ftp.ebi.ac.uk/pub/databases/gwas/summary_statistics/GCST90203001-GCST90204000/GCST90203809	36635386
GCST90200376	Flavin adenine dinucleotide (FAD) levels	flavin adenine dinucleotide (FAD) measurement	6257 European	http://ftp.ebi.ac.uk/pub/databases/gwas/summary_statistics/GCST90200001-GCST90201000/GCST90200376	36635386
GCST90201298	Formiminoglutamate levels	formiminoglutamate measurement	58 African unspecified	http://ftp.ebi.ac.uk/pub/databases/gwas/summary_statistics/GCST90201001-GCST90202000/GCST90201298	36635386
GCST90202333	Formiminoglutamate levels	formiminoglutamate measurement	103 East Asian	http://ftp.ebi.ac.uk/pub/databases/gwas/summary_statistics/GCST90202001-GCST90203000/GCST90202333	36635386
GCST90199905	Formiminoglutamate levels	formiminoglutamate measurement	8175 European	http://ftp.ebi.ac.uk/pub/databases/gwas/summary_statistics/GCST90199001-GCST90200000/GCST90199905	36635386
GCST90203343	Formiminoglutamate levels	formiminoglutamate measurement	107 South Asian	http://ftp.ebi.ac.uk/pub/databases/gwas/summary_statistics/GCST90203001-GCST90204000/GCST90203343	36635386
GCST90200437	Fructose levels	fructose measurement	8137 European	http://ftp.ebi.ac.uk/pub/databases/gwas/summary_statistics/GCST90200001-GCST90201000/GCST90200437	36635386
GCST90201833	Fructose levels	fructose measurement	60 African unspecified	http://ftp.ebi.ac.uk/pub/databases/gwas/summary_statistics/GCST90201001-GCST90202000/GCST90201833	36635386
GCST90202876	Fructose levels	fructose measurement	102 East Asian	http://ftp.ebi.ac.uk/pub/databases/gwas/summary_statistics/GCST90202001-GCST90203000/GCST90202876	36635386
GCST90201005	Fructose to maltose ratio	metabolite ratio	6307 European	http://ftp.ebi.ac.uk/pub/databases/gwas/summary_statistics/GCST90201001-GCST90202000/GCST90201005	36635386
GCST90200916	Fructose to sucrose ratio	metabolite ratio	7719 European	http://ftp.ebi.ac.uk/pub/databases/gwas/summary_statistics/GCST90200001-GCST90201000/GCST90200916	36635386
GCST90199965	Fructosyllysine levels	fructosyllysine measurement	8238 European	http://ftp.ebi.ac.uk/pub/databases/gwas/summary_statistics/GCST90199001-GCST90200000/GCST90199965	36635386
GCST90203405	Fructosyllysine levels	fructosyllysine measurement	108 South Asian	http://ftp.ebi.ac.uk/pub/databases/gwas/summary_statistics/GCST90203001-GCST90204000/GCST90203405	36635386
GCST90202403	Fructosyllysine levels	fructosyllysine measurement	102 East Asian	http://ftp.ebi.ac.uk/pub/databases/gwas/summary_statistics/GCST90202001-GCST90203000/GCST90202403	36635386
GCST90201374	Fructosyllysine levels	fructosyllysine measurement	59 African unspecified	http://ftp.ebi.ac.uk/pub/databases/gwas/summary_statistics/GCST90201001-GCST90202000/GCST90201374	36635386
GCST90201501	Furaneol sulfate levels	metabolite measurement	43 African unspecified	http://ftp.ebi.ac.uk/pub/databases/gwas/summary_statistics/GCST90201001-GCST90202000/GCST90201501	36635386
GCST90203529	Furaneol sulfate levels	metabolite measurement	78 South Asian	http://ftp.ebi.ac.uk/pub/databases/gwas/summary_statistics/GCST90203001-GCST90204000/GCST90203529	36635386
GCST90202526	Furaneol sulfate levels	metabolite measurement	89 East Asian	http://ftp.ebi.ac.uk/pub/databases/gwas/summary_statistics/GCST90202001-GCST90203000/GCST90202526	36635386
GCST90200097	Furaneol sulfate levels	metabolite measurement	5882 European	http://ftp.ebi.ac.uk/pub/databases/gwas/summary_statistics/GCST90200001-GCST90201000/GCST90200097	36635386
GCST90201086	Galactonate levels	galactonate measurement	45 African unspecified	http://ftp.ebi.ac.uk/pub/databases/gwas/summary_statistics/GCST90201001-GCST90202000/GCST90201086	36635386
GCST90199695	Galactonate levels	galactonate measurement	7518 European	http://ftp.ebi.ac.uk/pub/databases/gwas/summary_statistics/GCST90199001-GCST90200000/GCST90199695	36635386
GCST90203157	Galactonate levels	galactonate measurement	97 South Asian	http://ftp.ebi.ac.uk/pub/databases/gwas/summary_statistics/GCST90203001-GCST90204000/GCST90203157	36635386
GCST90202117	Galactonate levels	galactonate measurement	89 East Asian	http://ftp.ebi.ac.uk/pub/databases/gwas/summary_statistics/GCST90202001-GCST90203000/GCST90202117	36635386
GCST90199941	Gamma-CEHC glucuronide levels	gamma-CEHC glucuronide measurement	6305 European	http://ftp.ebi.ac.uk/pub/databases/gwas/summary_statistics/GCST90199001-GCST90200000/GCST90199941	36635386
GCST90203378	Gamma-CEHC glucuronide levels	gamma-CEHC glucuronide measurement	79 South Asian	http://ftp.ebi.ac.uk/pub/databases/gwas/summary_statistics/GCST90203001-GCST90204000/GCST90203378	36635386
GCST90202387	Gamma-CEHC glucuronide levels	gamma-CEHC glucuronide measurement	75 East Asian	http://ftp.ebi.ac.uk/pub/databases/gwas/summary_statistics/GCST90202001-GCST90203000/GCST90202387	36635386
GCST90201350	Gamma-CEHC glucuronide levels	gamma-CEHC glucuronide measurement	48 African unspecified	http://ftp.ebi.ac.uk/pub/databases/gwas/summary_statistics/GCST90201001-GCST90202000/GCST90201350	36635386
GCST90202311	Gamma-CEHC levels	gamma-CEHC measurement	104 East Asian	http://ftp.ebi.ac.uk/pub/databases/gwas/summary_statistics/GCST90202001-GCST90203000/GCST90202311	36635386
GCST90203321	Gamma-CEHC levels	gamma-CEHC measurement	108 South Asian	http://ftp.ebi.ac.uk/pub/databases/gwas/summary_statistics/GCST90203001-GCST90204000/GCST90203321	36635386
GCST90199864	Gamma-CEHC levels	gamma-CEHC measurement	8258 European	http://ftp.ebi.ac.uk/pub/databases/gwas/summary_statistics/GCST90199001-GCST90200000/GCST90199864	36635386
GCST90201277	Gamma-CEHC levels	gamma-CEHC measurement	60 African unspecified	http://ftp.ebi.ac.uk/pub/databases/gwas/summary_statistics/GCST90201001-GCST90202000/GCST90201277	36635386
GCST90203239	Gamma-glutamyl-2-aminobutyrate levels	gamma-glutamyl-2-aminobutyrate measurement	101 South Asian	http://ftp.ebi.ac.uk/pub/databases/gwas/summary_statistics/GCST90203001-GCST90204000/GCST90203239	36635386
GCST90202223	Gamma-glutamyl-2-aminobutyrate levels	gamma-glutamyl-2-aminobutyrate measurement	102 East Asian	http://ftp.ebi.ac.uk/pub/databases/gwas/summary_statistics/GCST90202001-GCST90203000/GCST90202223	36635386
GCST90199779	Gamma-glutamyl-2-aminobutyrate levels	gamma-glutamyl-2-aminobutyrate measurement	7826 European	http://ftp.ebi.ac.uk/pub/databases/gwas/summary_statistics/GCST90199001-GCST90200000/GCST90199779	36635386
GCST90201187	Gamma-glutamyl-2-aminobutyrate levels	gamma-glutamyl-2-aminobutyrate measurement	56 African unspecified	http://ftp.ebi.ac.uk/pub/databases/gwas/summary_statistics/GCST90201001-GCST90202000/GCST90201187	36635386
GCST90203292	Gamma-glutamylalanine levels	gamma-glutamylalanine measurement	103 South Asian	http://ftp.ebi.ac.uk/pub/databases/gwas/summary_statistics/GCST90203001-GCST90204000/GCST90203292	36635386
GCST90202277	Gamma-glutamylalanine levels	gamma-glutamylalanine measurement	88 East Asian	http://ftp.ebi.ac.uk/pub/databases/gwas/summary_statistics/GCST90202001-GCST90203000/GCST90202277	36635386
GCST90199834	Gamma-glutamylalanine levels	gamma-glutamylalanine measurement	7518 European	http://ftp.ebi.ac.uk/pub/databases/gwas/summary_statistics/GCST90199001-GCST90200000/GCST90199834	36635386
GCST90201235	Gamma-glutamylalanine levels	gamma-glutamylalanine measurement	49 African unspecified	http://ftp.ebi.ac.uk/pub/databases/gwas/summary_statistics/GCST90201001-GCST90202000/GCST90201235	36635386
GCST90201513	Gamma-glutamyl-alpha-lysine levels	gamma-glutamyl-alpha-lysine measurement	60 African unspecified	http://ftp.ebi.ac.uk/pub/databases/gwas/summary_statistics/GCST90201001-GCST90202000/GCST90201513	36635386
GCST90203546	Gamma-glutamyl-alpha-lysine levels	gamma-glutamyl-alpha-lysine measurement	107 South Asian	http://ftp.ebi.ac.uk/pub/databases/gwas/summary_statistics/GCST90203001-GCST90204000/GCST90203546	36635386
GCST90202562	Gamma-glutamyl-alpha-lysine levels	gamma-glutamyl-alpha-lysine measurement	103 East Asian	http://ftp.ebi.ac.uk/pub/databases/gwas/summary_statistics/GCST90202001-GCST90203000/GCST90202562	36635386
GCST90200107	Gamma-glutamyl-alpha-lysine levels	gamma-glutamyl-alpha-lysine measurement	8250 European	http://ftp.ebi.ac.uk/pub/databases/gwas/summary_statistics/GCST90200001-GCST90201000/GCST90200107	36635386
GCST90201579	Gamma-glutamylcitrulline levels	gamma-glutamylcitrulline measurement	60 African unspecified	http://ftp.ebi.ac.uk/pub/databases/gwas/summary_statistics/GCST90201001-GCST90202000/GCST90201579	36635386
GCST90202618	Gamma-glutamylcitrulline levels	gamma-glutamylcitrulline measurement	102 East Asian	http://ftp.ebi.ac.uk/pub/databases/gwas/summary_statistics/GCST90202001-GCST90203000/GCST90202618	36635386
GCST90200185	Gamma-glutamylcitrulline levels	gamma-glutamylcitrulline measurement	8163 European	http://ftp.ebi.ac.uk/pub/databases/gwas/summary_statistics/GCST90200001-GCST90201000/GCST90200185	36635386
GCST90203611	Gamma-glutamylcitrulline levels	gamma-glutamylcitrulline measurement	108 South Asian	http://ftp.ebi.ac.uk/pub/databases/gwas/summary_statistics/GCST90203001-GCST90204000/GCST90203611	36635386
GCST90201768	Gamma-glutamylglutamate levels	gamma-glutamylglutamate measurement	60 African unspecified	http://ftp.ebi.ac.uk/pub/databases/gwas/summary_statistics/GCST90201001-GCST90202000/GCST90201768	36635386
GCST90203798	Gamma-glutamylglutamate levels	gamma-glutamylglutamate measurement	108 South Asian	http://ftp.ebi.ac.uk/pub/databases/gwas/summary_statistics/GCST90203001-GCST90204000/GCST90203798	36635386
GCST90200375	Gamma-glutamylglutamate levels	gamma-glutamylglutamate measurement	8244 European	http://ftp.ebi.ac.uk/pub/databases/gwas/summary_statistics/GCST90200001-GCST90201000/GCST90200375	36635386
GCST90202824	Gamma-glutamylglutamate levels	gamma-glutamylglutamate measurement	103 East Asian	http://ftp.ebi.ac.uk/pub/databases/gwas/summary_statistics/GCST90202001-GCST90203000/GCST90202824	36635386
GCST90202753	Gamma-glutamylglutamine levels	gamma-glutamylglutamine measurement	103 East Asian	http://ftp.ebi.ac.uk/pub/databases/gwas/summary_statistics/GCST90202001-GCST90203000/GCST90202753	36635386
GCST90203739	Gamma-glutamylglutamine levels	gamma-glutamylglutamine measurement	107 South Asian	http://ftp.ebi.ac.uk/pub/databases/gwas/summary_statistics/GCST90203001-GCST90204000/GCST90203739	36635386
GCST90201712	Gamma-glutamylglutamine levels	gamma-glutamylglutamine measurement	59 African unspecified	http://ftp.ebi.ac.uk/pub/databases/gwas/summary_statistics/GCST90201001-GCST90202000/GCST90201712	36635386
GCST90200301	Gamma-glutamylglutamine levels	gamma-glutamylglutamine measurement	8217 European	http://ftp.ebi.ac.uk/pub/databases/gwas/summary_statistics/GCST90200001-GCST90201000/GCST90200301	36635386
GCST90202174	Gamma-glutamylglycine levels	gamma-glutamylglycine measurement	103 East Asian	http://ftp.ebi.ac.uk/pub/databases/gwas/summary_statistics/GCST90202001-GCST90203000/GCST90202174	36635386
GCST90199741	Gamma-glutamylglycine levels	gamma-glutamylglycine measurement	8263 European	http://ftp.ebi.ac.uk/pub/databases/gwas/summary_statistics/GCST90199001-GCST90200000/GCST90199741	36635386
GCST90203201	Gamma-glutamylglycine levels	gamma-glutamylglycine measurement	107 South Asian	http://ftp.ebi.ac.uk/pub/databases/gwas/summary_statistics/GCST90203001-GCST90204000/GCST90203201	36635386
GCST90201149	Gamma-glutamylglycine levels	gamma-glutamylglycine measurement	59 African unspecified	http://ftp.ebi.ac.uk/pub/databases/gwas/summary_statistics/GCST90201001-GCST90202000/GCST90201149	36635386
GCST90202765	Gamma-glutamylhistidine levels	gamma-glutamylhistidine measurement	104 East Asian	http://ftp.ebi.ac.uk/pub/databases/gwas/summary_statistics/GCST90202001-GCST90203000/GCST90202765	36635386
GCST90200315	Gamma-glutamylhistidine levels	gamma-glutamylhistidine measurement	8220 European	http://ftp.ebi.ac.uk/pub/databases/gwas/summary_statistics/GCST90200001-GCST90201000/GCST90200315	36635386
GCST90203753	Gamma-glutamylhistidine levels	gamma-glutamylhistidine measurement	106 South Asian	http://ftp.ebi.ac.uk/pub/databases/gwas/summary_statistics/GCST90203001-GCST90204000/GCST90203753	36635386
GCST90201714	Gamma-glutamylhistidine levels	gamma-glutamylhistidine measurement	59 African unspecified	http://ftp.ebi.ac.uk/pub/databases/gwas/summary_statistics/GCST90201001-GCST90202000/GCST90201714	36635386
GCST90203235	Gamma-glutamylisoleucine levels	gamma-glutamylisoleucine measurement	107 South Asian	http://ftp.ebi.ac.uk/pub/databases/gwas/summary_statistics/GCST90203001-GCST90204000/GCST90203235	36635386
GCST90202221	Gamma-glutamylisoleucine levels	gamma-glutamylisoleucine measurement	104 East Asian	http://ftp.ebi.ac.uk/pub/databases/gwas/summary_statistics/GCST90202001-GCST90203000/GCST90202221	36635386
GCST90199775	Gamma-glutamylisoleucine levels	gamma-glutamylisoleucine measurement	8267 European	http://ftp.ebi.ac.uk/pub/databases/gwas/summary_statistics/GCST90199001-GCST90200000/GCST90199775	36635386
GCST90201183	Gamma-glutamylisoleucine levels	gamma-glutamylisoleucine measurement	60 African unspecified	http://ftp.ebi.ac.uk/pub/databases/gwas/summary_statistics/GCST90201001-GCST90202000/GCST90201183	36635386
[truncated: 2,531 more rows]

## Sheet: Data 2
Supplementary Data 2. Datasets information for stroke and its subtypes
[truncated: 21 more rows]

[truncated: 7 more sheets: Data 3, Data 4, Data 5, Data 6, Data 7, Data8, Data9]
